# Supplementary material for: Alternative Splicing in Multiple Myeloma is Associated with the Non-Homologous End Joining Pathway
Source: Research Square preprint supplement (doi:10.21203/rs.3.rs-1957271/v1), 2022-08-18
Supplement: Supplementary file 1 [file 788c3a9d119fb1369e8b93ab.xlsx]

## Sheet: Table_of_contents
Table of contents	Names in the paper	Table name
S1	Supplementary Table1	Sample size of treatment group and control group among 16 comparisons
S2	Supplementary Table2	All high quality AS events identified from 16 comparisons
S3	Supplementary Table3	AS types of events identified in 16 comparisons
S4	Supplementary Table4	Events that are significantly associated with prognosis
S5	Supplementary Table5	Overlapped correlation network among three translocation comparisons

## Sheet: S1
Table 1. Sample size of treatment group and control group among 16 comparisons
Comparisons	treatment n=	Control n=
t(11;14) vs. No translocations	117	352
t(4;14) vs. No translocations	78	352
t(14;16) vs. No translocations	26	352
Hyperdiploid vs. Non-hyperdiploid	322	223
NRAS mutated vs. Wild type	93	505
KRAS mutated vs. Wild type	119	479
BRAF mutated vs. Wild type	49	549
FAM46C mutated vs. Wild type	61	537
Biallelic FAM46C vs. Wild type	26	419
DIS3 mutated vs. Wild type	64	534
Biallelic DIS3 vs. Wild type	36	295
t(4;14) plus mutated DIS3 vs other t(4;14)	17	61
Mutated TP53 vs. Wild type	35	563
Biallelic TP53 vs. Wild type	21	483
SF3B1 mutated vs. Wild type	11	11
SF3B1 mutation & hotspot vs. Wild type (SF3B1 mutation & non hotspot)	5	6

## Sheet: S2
Table 2. All high quality AS events identified from 16 comparisons
Events	dPSI	Group	Gene	MM_driver	ONCO_gene	TSG
ENSG00000168214.20;AF:chr4:26320725:26320815-26386353:26362436:26362628-26386353:+	0.122832	TENT5C	RBPJ	NO	NA	NA
ENSG00000176783.15;AF:chr5:179550836:179550879-179560025:179559692:179559835-179560025:+	0.150761	TENT5C	RUFY1	NO	NA	NA
ENSG00000099958.15;AL:chr22:23834503:23834932-23837064:23836734:23836962-23837064:-	-0.116099	TENT5C	DERL3	NO	NA	NA
ENSG00000158805.12;AF:chr16:89720400:89720582-89722531:89721160:89721276-89722531:+	-0.108302	TENT5C	ZNF276	NO	NA	NA
ENSG00000142541.17;A5:chr19:49490090-49490232:49489912-49490232:+	0.104162	TENT5C	RPL13A	NO	NA	NA
ENSG00000165140.11;SE:chr9:94610061-94617768:94617860-94620329:-	0.166448	TENT5C	FBP1	NO	NA	NA
ENSG00000123349.14;A3:chr12:53295941-53296430:53295941-53297850:+	0.107416	TENT5C	PFDN5	NO	NA	NA
ENSG00000070081.17;AF:chr11:17276739:17276828-17282789:17277023:17277095-17282789:+	-0.125984	TENT5C	NUCB2	NO	NA	NA
ENSG00000005893.16;A3:chrX:120431462-120441730:120428626-120441730:-	-0.110238	TENT5C	LAMP2	NO	NA	NA
ENSG00000035862.12;AF:chr17:78873919-78874029:78874150:78873919-78924959:78925387:-	-0.10546	TENT5C	TIMP2	NO	NA	NA
ENSG00000091490.11;AL:chr4:25748266:25748564-25757534:25755922:25756908-25757534:-	0.101222	TENT5C	SEL1L3	NO	NA	NA
ENSG00000103769.10;AF:chr15:65869491:65869625-65877332:65870013:65870085-65877332:+	0.104937	TENT5C	RAB11A	NO	NA	NA
ENSG00000158805.12;AF:chr16:89720400:89720582-89722531:89721007:89721276-89722531:+	-0.119638	TENT5C	ZNF276	NO	NA	NA
ENSG00000140299.13;SE:chr15:59664120-59665350:59665442-59668103:-	-0.140248	TENT5C	BNIP2	NO	NA	NA
ENSG00000143321.19;AF:chr1:156745373-156747435:156747471:156745373-156751343:156751496:-	0.11715	TENT5C	HDGF	NO	NA	NA
ENSG00000102805.16;AL:chr13:76996127-77000458:77002464:76996127-77008744:77010968:+	-0.11104	TENT5C	CLN5	NO	NA	NA
ENSG00000168216.13;AF:chr6:69790472-69796294:69796341:69790472-69796813:69797010:-	0.119495	TENT5C	LMBRD1	NO	NA	NA
ENSG00000158604.15;AL:chr7:44577894:44579628-44581449:44579897:44581239-44581449:-	0.11765	TENT5C	TMED4	NO	NA	NA
ENSG00000196352.16;AL:chr1:207339417-207340391:207340766:207339417-207359546:207360966:+	0.13319	TENT5C	CD55	NO	NA	NA
ENSG00000100299.18;SE:chr22:50627406-50627556:50627792-50627946:-	0.10473	TENT5C	ARSA	NO	NA	NA
ENSG00000125347.14;AF:chr5:132489483-132490050:132490262:132489483-132490545:132490773:-	-0.126173	TENT5C	IRF1	YES	NA	NA
ENSG00000179630.11;AF:chr13:43879284:43879734-43880952:43879904:43880119-43880952:+	0.100405	TENT5C	LACC1	NO	NA	NA
ENSG00000242086.8;AL:chr3:195699207-195701380:195701621:195699207-195708747:195708807:+	0.211814	TENT5C	MUC20-OT1	NO	NA	NA
ENSG00000005893.16;AL:chrX:120427827:120428626-120441730:120436494:120439293-120441730:-	0.105442	TENT5C	LAMP2	NO	NA	NA
ENSG00000176783.15;AF:chr5:179550554:179550879-179560025:179559692:179559835-179560025:+	0.123457	TENT5C	RUFY1	NO	NA	NA
ENSG00000242086.8;AF:chr3:195698663:195699207-195708747:195708154:195708268-195708747:+	-0.126406	TENT5C	MUC20-OT1	NO	NA	NA
ENSG00000167460.17;AF:chr19:16076489:16076697-16081913:16080552:16081343-16081913:+	-0.105987	TENT5C	TPM4	NO	NA	NA
ENSG00000178177.16;AF:chr4:17972885-18020531:18020734:17972885-18021598:18021757:-	-0.103409	TENT5C	LCORL	NO	NA	NA
ENSG00000100219.16;RI:chr22:28796047:28796123-28796150:28796192:-	0.100292	TENT5C	XBP1	YES	NA	NA
ENSG00000120805.14;AF:chr12:101405981-101407278:101407463:101405981-101407642:101407756:-	0.114007	TENT5C	ARL1	NO	NA	NA
ENSG00000159023.21;AF:chr1:28887091:28887210-28987431:28914562:28914768-28987431:+	-0.105492	TENT5C	EPB41	NO	NA	NA
ENSG00000129657.16;AF:chr17:77209861:77212201-77213314:77212715:77212752-77213314:+	0.121476	TENT5C	SEC14L1	NO	NA	NA
ENSG00000158290.18;AF:chrX:120558039-120559779:120559915:120558039-120560083:120560962:-	-0.101255	TENT5C	CUL4B	NO	NA	NA
ENSG00000134285.11;AL:chr12:48921959:48922201-48923782:48922565:48923145-48923782:-	-0.105305	TENT5C	FKBP11	NO	NA	NA
ENSG00000027697.15;AF:chr6:137207077-137219094:137219122:137207077-137219243:137219449:-	-0.11772	TENT5C	IFNGR1	NO	NA	NA
ENSG00000080822.17;AL:chr3:98500840:98501520-98517052:98515483:98515832-98517052:-	-0.115334	HyperD	CLDND1	NO	NA	NA
ENSG00000145425.10;SE:chr4:151099714-151100485:151100588-151102871:+	0.101825	HyperD	RPS3A	YES	NA	NA
ENSG00000101294.18;AL:chr20:31561736-31562413:31562671:31561736-31566210:31566275:+	0.115947	HyperD	HM13	NO	NA	NA
ENSG00000177410.13;AL:chr20:49279208-49280485:49281181:49279208-49289045:49289260:+	0.119385	HyperD	ZFAS1	NO	NA	NA
ENSG00000168488.18;AF:chr16:28823252:28823558-28825366:28824451:28824661-28825366:+	0.109141	HyperD	ATXN2L	NO	NA	NA
ENSG00000125347.14;AF:chr5:132489483-132490050:132490262:132489483-132490545:132490754:-	-0.105439	HyperD	IRF1	YES	NA	NA
ENSG00000168216.13;AF:chr6:69790472-69796294:69796341:69790472-69796813:69797010:-	0.10551	HyperD	LMBRD1	NO	NA	NA
ENSG00000058799.15;SE:chr1:53852270-53855001:53855051-53860056:-	0.103353	HyperD	YIPF1	NO	NA	NA
ENSG00000163453.11;AF:chr4:57040933-57065489:57065603:57040933-57109877:57110385:-	-0.172064	HyperD	IGFBP7	NO	NA	NA
ENSG00000077380.16;AF:chr2:171687409:171687627-171690147:171687672:171687873-171690147:+	-0.112391	HyperD	DYNC1I2	NO	NA	NA
ENSG00000269893.8;SE:chr4:118278792-118278944:118279137-118279389:+	-0.11294	HyperD	SNHG8	NO	NA	NA
ENSG00000230590.11;AF:chrX:74281848-74292169:74292351:74281848-74293352:74293543:-	0.102411	HyperD	FTX	NO	NA	NA
ENSG00000119705.10;AL:chr14:77715879-77717496:77717584:77715879-77720516:77721107:+	-0.109839	HyperD	SLIRP	NO	NA	NA
ENSG00000070081.17;AF:chr11:17276741:17276828-17282789:17277023:17277095-17282789:+	-0.144978	HyperD	NUCB2	NO	NA	NA
ENSG00000075711.21;SE:chr3:197149796-197161640:197161738-197194425:-	0.107387	HyperD	DLG1	NO	NA	NA
ENSG00000205581.11;AF:chr21:39348577-39348903:39349054:39348577-39349460:39349647:-	0.112934	HyperD	HMGN1	NO	NA	NA
ENSG00000115677.17;AF:chr2:241268541-241272761:241272863:241268541-241315570:241315672:-	-0.185718	HyperD	HDLBP	NO	NA	NA
ENSG00000123352.18;SE:chr12:49367587-49371228:49371290-49441730:+	0.159833	HyperD	SPATS2	NO	NA	NA
ENSG00000119185.13;AF:chr2:9420100-9422479:9423229:9420100-9423373:9423480:-	-0.131197	HyperD	ITGB1BP1	NO	NA	NA
ENSG00000198682.13;SE:chr10:87715843-87721756:87721770-87727284:+	0.125498	HyperD	PAPSS2	NO	NA	NA
ENSG00000104852.15;A5:chr19:49102185-49104634:49102173-49104634:+	-0.118644	HyperD	SNRNP70	NO	NA	NA
ENSG00000214827.11;SE:chrX:155065789-155065906:155066057-155070694:-	-0.10861	HyperD	MTCP1	NO	NA	NA
ENSG00000231721.7;AL:chr7:130938963:130941858-130945720:130944796:130944889-130945720:-	0.106927	HyperD	LINC-PINT	NO	NA	NA
ENSG00000075420.13;AF:chr3:172039578:172039771-172112452:172040554:172040624-172112452:+	-0.121868	HyperD	FNDC3B	NO	NA	NA
ENSG00000187091.14;AF:chr3:38020352-38024337:38024787:38020352-38029506:38029642:-	-0.136527	HyperD	PLCD1	NO	NA	NA
ENSG00000203875.13;A3:chr6:85678032-85678136:85677492-85678136:-	0.111088	HyperD	SNHG5	NO	NA	NA
ENSG00000121940.16;AF:chr1:108949921-108950309:108951926:108949921-108963361:108963476:-	-0.105212	HyperD	CLCC1	NO	NA	NA
ENSG00000225484.7;AL:chr10:79766290:79766324-79804485:79795691:79798027-79804485:-	-0.137464	HyperD	NUTM2B-AS1	NO	NA	NA
ENSG00000203875.13;A3:chr6:85677875-85677954:85677492-85677954:-	0.11025	HyperD	SNHG5	NO	NA	NA
ENSG00000158805.12;AF:chr16:89720400:89720582-89722531:89721160:89721276-89722531:+	-0.162821	HyperD	ZNF276	NO	NA	NA
ENSG00000142541.17;A5:chr19:49490090-49490232:49489912-49490232:+	0.143351	HyperD	RPL13A	NO	NA	NA
ENSG00000135916.16;AF:chr2:230864980:230865145-230873417:230873231:230873338-230873417:+	0.103721	HyperD	ITM2C	NO	NA	NA
ENSG00000135930.14;SE:chr2:232567214-232574263:232574341-232580904:+	0.102041	HyperD	EIF4E2	NO	NA	NA
ENSG00000075413.18;SE:chr14:103498528-103500156:103500200-103502882:+	0.141501	HyperD	MARK3	NO	NA	NA
ENSG00000101294.18;AL:chr20:31566295-31567640:31567986:31566295-31569120:31569308:+	0.112797	HyperD	HM13	NO	NA	NA
ENSG00000230590.11;AL:chrX:74028251:74031813-74280394:74067483:74069584-74280394:-	0.131926	HyperD	FTX	NO	NA	NA
ENSG00000225484.7;SE:chr10:79804527-79808759:79808832-79814613:-	-0.137807	HyperD	NUTM2B-AS1	NO	NA	NA
ENSG00000005801.18;MX:chr11:3360565-3360720:3360788-3370975:3360565-3361743:3368855-3370975:-	-0.10634	HyperD	ZNF195	NO	NA	NA
ENSG00000204628.12;AF:chr5:181242345-181242554:181243370:181242345-181243680:181243916:-	0.236704	HyperD	RACK1	NO	NA	NA
ENSG00000158805.12;AF:chr16:89720400:89720582-89722531:89721007:89721276-89722531:+	-0.170079	HyperD	ZNF276	NO	NA	NA
ENSG00000067225.18;A5:chr15:72200655-72202454:72200655-72203022:-	0.122235	HyperD	PKM	NO	NA	NA
ENSG00000099810.21;AL:chr9:21859425-21861976:21867081:21859425-21931008:21937651:+	0.102923	HyperD	MTAP	NO	NA	NA
ENSG00000134419.15;SE:chr16:18784823-18788063:18788159-18788981:-	0.103702	HyperD	RPS15A	NO	NA	NA
ENSG00000138757.14;SE:chr4:75662049-75724056:75724176-75724276:-	0.106361	HyperD	G3BP2	NO	NA	NA
ENSG00000187391.22;SE:chr7:78178102-78185629:78185670-78194874:-	-0.124239	HyperD	MAGI2	NO	NA	NA
ENSG00000265681.7;A3:chr18:49491833-49492275:49491584-49492275:-	-0.11536	HyperD	RPL17	NO	NA	NA
ENSG00000161960.16;AF:chr17:7572837:7572864-7574260:7573235:7573547-7574260:+	-0.112693	HyperD	EIF4A1	NO	NA	NA
ENSG00000100209.11;AF:chr22:28742055:28742331-28743882:28742679:28742728-28743882:+	-0.128796	HyperD	HSCB	NO	NA	NA
ENSG00000104973.19;RI:chr19:49836226:49836406-49836847:49836979:+	0.123408	HyperD	MED25	NO	NA	NA
ENSG00000150967.18;SE:chr12:122940284-122940807:122940995-122944391:-	-0.104117	HyperD	ABCB9	NO	NA	NA
ENSG00000140009.18;A3:chr14:64227929-64234970:64227614-64234970:-	0.111483	HyperD	ESR2	NO	NA	NA
ENSG00000129657.16;AF:chr17:77140932:77141054-77142646:77141386:77141721-77142646:+	-0.100467	HyperD	SEC14L1	NO	NA	NA
ENSG00000265681.7;AF:chr18:49491833-49492275:49492305:49491833-49492458:49492479:-	-0.113982	HyperD	RPL17	NO	NA	NA
ENSG00000165359.15;RI:chrX:135569337:135569431-135572815:135573033:+	0.131863	HyperD	INTS6L	NO	NA	NA
ENSG00000227543.5;SE:chr17:28599839-28606296:28606460-28616285:+	0.105286	HyperD	SPAG5-AS1	NO	NA	NA
ENSG00000231721.7;AF:chr7:131052555-131088320:131088474:131052555-131107720:131107923:-	-0.106927	HyperD	LINC-PINT	NO	NA	NA
ENSG00000033030.15;SE:chr12:122482695-122483279:122483563-122489386:-	-0.115934	HyperD	ZCCHC8	NO	NA	NA
ENSG00000070081.17;AF:chr11:17276739:17276828-17282789:17277023:17277095-17282789:+	-0.155238	HyperD	NUCB2	NO	NA	NA
ENSG00000163938.17;AF:chr3:52686005:52686105-52686769:52686171:52686425-52686769:+	-0.139141	HyperD	GNL3	NO	NA	NA
ENSG00000152556.17;SE:chr12:48135038-48135291:48135383-48137721:+	0.133904	HyperD	PFKM	NO	NA	NA
ENSG00000064225.12;AF:chr3:98732704:98733011-98768430:98763348:98763439-98768430:+	-0.14819	HyperD	ST3GAL6	NO	NA	NA
ENSG00000185963.14;RI:chr9:92711363:92713461-92715253:92715463:-	-0.103269	HyperD	BICD2	NO	NA	NA
ENSG00000064225.12;AF:chr3:98732704:98733011-98768430:98763321:98763431-98768430:+	-0.107283	HyperD	ST3GAL6	NO	NA	NA
ENSG00000123352.18;AL:chr12:49461037-49462275:49463625:49461037-49484590:49484673:+	0.16839	HyperD	SPATS2	NO	NA	NA
ENSG00000204628.12;AL:chr5:181236934:181237042-181239067:181238124:181238239-181239067:-	-0.11401	HyperD	RACK1	NO	NA	NA
ENSG00000203875.13;SE:chr6:85677492-85677795:85678032-85678136:-	0.106531	HyperD	SNHG5	NO	NA	NA
ENSG00000151702.17;AF:chr11:128692982:128693143-128758115:128694072:128694276-128758115:+	-0.124972	HyperD	FLI1	NO	NA	NA
ENSG00000059377.18;AL:chr7:139787426-139789264:139789622:139787426-139797210:139797484:+	0.211678	HyperD	TBXAS1	NO	NA	NA
ENSG00000109685.18;AL:chr4:1939778-1942339:1948818:1939778-1951072:1951180:+	-0.138944	HyperD	NSD2	NO	NA	NA
ENSG00000130349.10;A5:chr6:107028797-107039749:107028271-107039749:+	0.112669	HyperD	MTRES1	NO	NA	NA
ENSG00000229809.8;AF:chr16:30571123-30571225:30571320:30571123-30571434:30572734:-	0.118207	HyperD	ZNF688	NO	NA	NA
ENSG00000146828.18;AL:chr7:100862827-100865287:100865538:100862827-100865719:100867010:+	-0.139261	HyperD	SLC12A9	NO	NA	NA
ENSG00000003402.20;AF:chr2:201116239:201116481-201129729:201122477:201122747-201129729:+	-0.110728	HyperD	CFLAR	NO	NA	NA
ENSG00000257727.6;AF:chr12:56314966-56315130:56315206:56314966-56315821:56315930:-	-0.101421	HyperD	CNPY2	NO	NA	NA
ENSG00000003402.20;AF:chr2:201116239:201116481-201129729:201116837:201116967-201129729:+	-0.151935	HyperD	CFLAR	NO	NA	NA
ENSG00000119705.10;AL:chr14:77715879-77717502:77717598:77715879-77720516:77721107:+	-0.102497	HyperD	SLIRP	NO	NA	NA
ENSG00000124222.22;SE:chr20:58652138-58659623:58659634-58667490:+	0.105564	HyperD	STX16	NO	NA	NA
ENSG00000115998.7;AF:chr2:70182935-70190184:70190699:70182935-70190973:70191071:-	0.10869	HyperD	C2orf42	NO	NA	NA
ENSG00000075711.21;AF:chr3:197297235-197297673:197298115:197297235-197298418:197298576:-	-0.110777	HyperD	DLG1	NO	NA	NA
ENSG00000196693.15;AL:chr10:42574185:42574678-42594595:42581594:42583123-42594595:-	-0.132317	HyperD	ZNF33B	NO	NA	NA
ENSG00000158411.11;A5:chr2:99170652-99171343:99170652-99171510:-	0.110554	HyperD	MITD1	NO	NA	NA
ENSG00000174373.16;SE:chr14:35539690-35548508:35548538-35549110:-	0.167725	HyperD	RALGAPA1	NO	NA	NA
ENSG00000104973.19;AL:chr19:49836406-49836847:49836979:49836406-49838580:49840383:+	-0.109931	HyperD	MED25	NO	NA	NA
ENSG00000165359.15;SE:chrX:135569431-135570436:135570546-135572815:+	0.152501	HyperD	INTS6L	NO	NA	NA
ENSG00000065882.16;SE:chr4:38049898-38053106:38053225-38054199:+	0.118036	HyperD	TBC1D1	NO	NA	NA
ENSG00000105701.16;AF:chr19:18541995-18542888:18542972:18541995-18543909:18544077:-	0.135373	HyperD	FKBP8	NO	NA	NA
ENSG00000168385.18;MX:chr2:241315982-241324216:241324241-241335126:241315982-241325993:241326113-241335126:+	0.135141	HyperD	SEPTIN2	NO	NA	NA
ENSG00000154511.12;AF:chr1:92876430-92876961:92877150:92876430-92961376:92961522:-	-0.104636	HyperD	DIPK1A	NO	NA	NA
ENSG00000101294.18;AL:chr20:31566295-31568078:31568211:31566295-31569120:31569308:+	0.119678	HyperD	HM13	NO	NA	NA
ENSG00000172725.14;SE:chr11:67440439-67440702:67440836-67441125:-	0.129489	HyperD	CORO1B	NO	NA	NA
ENSG00000154723.12;AF:chr21:25729801-25734939:25735033:25729801-25735315:25735646:-	0.10313	HyperD	ATP5PF	NO	NA	NA
ENSG00000149761.9;AL:chr11:64229571-64229850:64230007:64229571-64230183:64230219:+	0.110488	HyperD	NUDT22	NO	NA	NA
ENSG00000137500.9;AF:chr11:83280260-83285127:83285998:83280260-83286100:83286390:-	0.107889	HyperD	CCDC90B	NO	NA	NA
ENSG00000143164.15;AF:chr1:167936274:167936509-167951800:167936673:167937008-167951800:+	-0.124434	HyperD	DCAF6	NO	NA	NA
ENSG00000185475.11;A3:chr11:62789426-62789601:62789426-62789886:+	0.1052	HyperD	TMEM179B	NO	NA	NA
ENSG00000023445.16;SE:chr11:102317571-102319877:102320006-102321837:+	-0.110412	HyperD	BIRC3	NO	NA	NA
ENSG00000136856.18;AL:chr9:127404991-127405420:127405447:127404991-127407112:127407898:+	0.113454	TP53	SLC2A8	NO	NA	NA
ENSG00000241370.6;RI:chr6:30345298:30345398-30345467:30345573:+	0.121339	TP53	RPP21	NO	NA	NA
ENSG00000093010.14;AL:chr22:19964299-19967164:19967694:19964299-19968536:19969016:+	0.104588	TP53	COMT	NO	NA	NA
ENSG00000143761.16;AF:chr1:228082741:228082850-228097078:228088116:228088277-228097078:+	-0.121172	TP53	ARF1	NO	NA	NA
ENSG00000127314.18;SE:chr12:68611043-68648699:68648781-68654112:+	-0.106834	TP53	RAP1B	NO	NA	NA
ENSG00000168214.20;AF:chr4:26320725:26320815-26386353:26362436:26362628-26386353:+	0.181393	TP53	RBPJ	NO	NA	NA
ENSG00000153048.11;AF:chr16:8859335-8868327:8868361:8859335-8868966:8869006:-	0.134808	TP53	CARHSP1	NO	NA	NA
ENSG00000131089.17;AL:chrX:63634967:63638209-63643980:63639524:63642910-63643980:-	-0.121205	TP53	ARHGEF9	NO	NA	NA
ENSG00000115053.16;AF:chr2:231463316-231464160:231464199:231463316-231482684:231483641:-	-0.138722	TP53	NCL	NO	NA	NA
ENSG00000105926.15;SE:chr7:24573593-24623666:24623784-24641716:+	0.101824	TP53	MPP6	NO	NA	NA
ENSG00000187231.14;A5:chr2:179115256-179116574:179115256-179116668:-	-0.145116	TP53	SESTD1	NO	NA	NA
ENSG00000135916.16;AF:chr2:230864980:230865145-230873417:230873231:230873338-230873417:+	0.111522	TP53	ITM2C	NO	NA	NA
ENSG00000143761.16;AF:chr1:228082741:228082850-228097078:228090488:228091071-228097078:+	-0.119542	TP53	ARF1	NO	NA	NA
ENSG00000143761.16;AF:chr1:228082741:228082850-228097078:228083085:228083512-228097078:+	-0.120754	TP53	ARF1	NO	NA	NA
ENSG00000171928.14;AF:chr17:18781314:18782549-18789353:18789035:18789051-18789353:+	-0.151223	TP53	TVP23B	NO	NA	NA
ENSG00000205352.11;AF:chr12:53441732:53441792-53442695:53441795:53442586-53442695:+	-0.170796	TP53	PRR13	NO	NA	NA
ENSG00000136104.21;AL:chr13:50949505-50956358:50956460:50949505-50969932:50973745:+	-0.121217	TP53	RNASEH2B	NO	NA	NA
ENSG00000138032.21;AL:chr2:44218537-44229993:44231471:44218537-44232316:44232721:+	0.125419	TP53	PPM1B	NO	NA	NA
ENSG00000230590.11;AL:chrX:74028251:74031813-74280394:74067483:74069584-74280394:-	-0.153738	TP53	FTX	NO	NA	NA
ENSG00000119397.16;AF:chr9:121118469:121118540-121123931:121121801:121121951-121123931:+	-0.131273	TP53	CNTRL	NO	NA	NA
ENSG00000077454.16;AL:chr7:100574011:100574356-100575705:100574709:100575304-100575705:-	-0.145257	TP53	LRCH4	NO	NA	NA
ENSG00000223482.8;SE:chr10:87203936-87246115:87246212-87288442:-	-0.152371	TP53	NUTM2A-AS1	NO	NA	NA
ENSG00000135441.7;AF:chr12:55716038:55716196-55716933:55716292:55716717-55716933:+	0.112494	TP53	BLOC1S1	NO	NA	NA
ENSG00000173221.14;AL:chr5:95813979:95814389-95816507:95814563:95814807-95816507:-	0.125469	TP53	GLRX	NO	NA	NA
ENSG00000102034.17;AF:chrX:130081539-130110325:130110497:130081539-130110620:130110716:-	0.11428	TP53	ELF4	NO	NA	NA
ENSG00000156384.14;AF:chr10:104122058:104122154-104122965:104122165:104122196-104122965:+	0.129156	TP53	SFR1	NO	NA	NA
ENSG00000115677.17;AF:chr2:241248348-241249358:241249396:241248348-241249841:241250937:-	-0.148153	TP53	HDLBP	NO	NA	NA
ENSG00000088038.19;AL:chr19:54153840-54153944:54154455:54153840-54155309:54155680:+	-0.144052	TP53	CNOT3	NO	NA	NA
ENSG00000198791.12;SE:chr8:17230848-17232427:17232537-17234716:-	0.106861	TP53	CNOT7	NO	NA	NA
ENSG00000128951.14;AF:chr15:48331095:48331191-48332268:48331429:48331795-48332268:+	-0.142711	TP53	DUT	NO	NA	NA
ENSG00000136856.18;AL:chr9:127404991-127405420:127405469:127404991-127407112:127407898:+	0.112746	TP53	SLC2A8	NO	NA	NA
ENSG00000143549.21;AF:chr1:154173201-154176115:154176242:154173201-154182988:154183147:-	-0.143127	TP53	TPM3	NO	NA	NA
ENSG00000136104.21;AL:chr13:50949505-50956358:50956460:50949505-50969932:50970456:+	-0.14331	TP53	RNASEH2B	NO	NA	NA
ENSG00000158604.15;AL:chr7:44577894:44579628-44581449:44579897:44581239-44581449:-	0.106009	TP53	TMED4	NO	NA	NA
ENSG00000134508.12;AF:chr18:23134564:23134651-23188838:23135763:23136607-23188838:+	-0.11086	TP53	CABLES1	NO	NA	NA
ENSG00000137216.19;AF:chr6:44126914:44127072-44134561:44127554:44127678-44134561:+	-0.113557	TP53	TMEM63B	NO	NA	NA
ENSG00000230989.7;A3:chr16:83809425-83811421:83809425-83817786:+	0.120469	TP53	HSBP1	NO	NA	NA
ENSG00000197841.15;RI:chr19:34739148:34739268-34739523:34739621:+	-0.106093	TP53	ZNF181	NO	NA	NA
ENSG00000196642.19;AL:chr9:136832370-136833720:136834340:136832370-136835742:136836998:+	-0.122669	TP53	RABL6	NO	NA	NA
ENSG00000128609.15;SE:chr7:123545676-123550470:123550586-123557404:-	-0.127525	TP53	NDUFA5	NO	NA	NA
ENSG00000138668.19;AF:chr4:82371584-82373119:82373150:82371584-82373446:82373991:-	-0.159394	TP53	HNRNPD	NO	NA	NA
ENSG00000100614.18;AF:chr14:60245785:60246046-60282684:60249221:60249677-60282684:+	-0.168786	TP53	PPM1A	NO	NA	NA
ENSG00000182568.17;SE:chr3:18349682-18351313:18351408-18351992:-	-0.119013	TP53	SATB1	NO	NA	NA
ENSG00000052723.12;A5:chr1:114779284-114780110:114779284-114780449:-	0.106974	TP53	SIKE1	NO	NA	NA
ENSG00000156313.15;RI:chrX:38287094:38287245-38287861:38288041:-	-0.139766	TP53	RPGR	NO	NA	NA
ENSG00000217128.12;SE:chr5:131709272-131710578:131710661-131716565:-	0.130525	TP53	FNIP1	NO	NA	NA
ENSG00000079616.13;A3:chr16:29804065-29804576:29804065-29804814:+	0.120994	TP53	KIF22	NO	NA	NA
ENSG00000166803.14;SE:chr15:64366075-64373698:64373764-64376743:-	-0.109249	TP53	PCLAF	NO	NA	NA
ENSG00000273841.5;AF:chr5:69366595-69369387:69369477:69366595-69369657:69370013:-	-0.128134	TP53	TAF9	NO	NA	NA
ENSG00000108107.15;AL:chr19:55388048-55388243:55388343:55388048-55402943:55403250:+	0.118361	TP53	RPL28	NO	NA	NA
ENSG00000136104.21;AL:chr13:50949505-50956358:50956460:50949505-50969932:50970357:+	-0.145978	TP53	RNASEH2B	NO	NA	NA
ENSG00000160050.15;RI:chr1:32204598:32204620-32205194:32205387:+	0.160745	TP53	CCDC28B	NO	NA	NA
ENSG00000150967.18;SE:chr12:122940284-122940807:122940995-122944391:-	-0.140108	TP53	ABCB9	NO	NA	NA
ENSG00000234912.12;AF:chr17:77088631:77088682-77089153:77088778:77088949-77089153:+	0.102781	TP53	SNHG20	NO	NA	NA
ENSG00000061676.15;SE:chr2:183023916-183024978:183024995-183037992:-	0.182685	TP53	NCKAP1	NO	NA	NA
ENSG00000136754.17;SE:chr10:26751783-26759062:26759238-26765218:-	0.117518	TP53	ABI1	NO	NA	NA
ENSG00000241370.6;RI:chr6:30345298:30345398-30345467:30345573:+	0.157028	TP53_BI	RPP21	NO	NA	NA
ENSG00000131089.17;AL:chrX:63634967:63638209-63643980:63639524:63642910-63643980:-	-0.11089	TP53_BI	ARHGEF9	NO	NA	NA
ENSG00000105926.15;SE:chr7:24573593-24623666:24623784-24641716:+	0.171527	TP53_BI	MPP6	NO	NA	NA
ENSG00000187231.14;A5:chr2:179115256-179116574:179115256-179116668:-	-0.154523	TP53_BI	SESTD1	NO	NA	NA
ENSG00000064225.12;AF:chr3:98732255:98732532-98768430:98763321:98763431-98768430:+	0.260685	TP53_BI	ST3GAL6	NO	NA	NA
ENSG00000168273.8;AL:chr3:52536906-52540424:52541890:52536906-52579018:52579237:+	0.109723	TP53_BI	SMIM4	NO	NA	NA
ENSG00000100811.14;SE:chr14:100274758-100276490:100276648-100277418:+	0.105564	TP53_BI	YY1	NO	NA	NA
ENSG00000153029.14;SE:chr1:181034074-181036997:181037112-181049052:+	-0.105295	TP53_BI	MR1	NO	NA	NA
ENSG00000217128.12;SE:chr5:131709272-131710578:131710661-131716565:-	0.145036	TP53_BI	FNIP1	NO	NA	NA
ENSG00000106603.19;AL:chr7:43609233:43609641-43639449:43631152:43633408-43639449:-	0.109208	TP53_BI	COA1	NO	NA	NA
ENSG00000163584.18;A3:chr3:170868201-170868298:170868134-170868298:-	-0.102892	TP53_BI	RPL22L1	NO	NA	NA
ENSG00000205352.11;AF:chr12:53441732:53441792-53442695:53441795:53442586-53442695:+	-0.173476	TP53_BI	PRR13	NO	NA	NA
ENSG00000077454.16;AL:chr7:100574011:100574356-100575705:100574709:100575304-100575705:-	-0.173442	TP53_BI	LRCH4	NO	NA	NA
ENSG00000182165.18;A5:chr7:87341684-87345043:87341684-87345305:-	-0.104845	TP53_BI	TP53TG1	NO	NA	NA
ENSG00000164104.12;A5:chr4:173333669-173334246:173333669-173334272:-	0.113608	TP53_BI	HMGB2	NO	NA	NA
ENSG00000137216.19;AF:chr6:44126914:44127072-44134561:44127554:44127678-44134561:+	-0.139253	TP53_BI	TMEM63B	NO	NA	NA
ENSG00000179454.14;SE:chr14:44945928-44953623:44953709-44961846:-	-0.100709	TP53_BI	KLHL28	NO	NA	NA
ENSG00000052723.12;A5:chr1:114779284-114780110:114779284-114780449:-	0.100256	TP53_BI	SIKE1	NO	NA	NA
ENSG00000105443.15;A5:chr19:48474953-48478069:48474949-48478069:+	0.15564	TP53_BI	CYTH2	NO	NA	NA
ENSG00000133460.19;AF:chr22:23857000:23857531-23862104:23857895:23858029-23862104:+	0.11634	TP53_BI	SLC2A11	NO	NA	NA
ENSG00000133460.19;A3:chr22:23868641-23875085:23868641-23875121:+	-0.110707	TP53_BI	SLC2A11	NO	NA	NA
ENSG00000219200.11;A5:chr17:7012761-7013666:7012757-7013666:+	0.102965	TP53_BI	RNASEK	NO	NA	NA
ENSG00000054654.19;SE:chr14:64081580-64087419:64087487-64087671:+	-0.10266	TP53_BI	SYNE2	NO	NA	NA
ENSG00000136754.17;SE:chr10:26751783-26759062:26759238-26765218:-	0.124893	TP53_BI	ABI1	NO	NA	NA
ENSG00000143761.16;AF:chr1:228082741:228082850-228097078:228088116:228088277-228097078:+	-0.214092	TP53_BI	ARF1	NO	NA	NA
ENSG00000115053.16;AF:chr2:231463316-231464160:231464199:231463316-231482684:231483641:-	-0.157387	TP53_BI	NCL	NO	NA	NA
ENSG00000163945.18;A5:chr4:1347887-1348090:1347760-1348090:+	0.101799	TP53_BI	UVSSA	NO	NA	NA
ENSG00000213999.17;A3:chr19:19146384-19146555:19146022-19146555:-	0.115771	TP53_BI	MEF2B	NO	NA	NA
ENSG00000074603.19;AF:chr15:65512564-65515656:65517273:65512564-65517486:65517663:-	0.102145	TP53_BI	DPP8	NO	NA	NA
ENSG00000135916.16;AF:chr2:230864980:230865145-230873417:230873231:230873338-230873417:+	0.143809	TP53_BI	ITM2C	NO	NA	NA
ENSG00000249915.8;AF:chr5:271661:271821-304177:272712:272772-304177:+	0.116553	TP53_BI	PDCD6	NO	NA	NA
ENSG00000137070.18;AF:chr9:34650702:34652057-34655218:34652185:34652233-34655218:+	-0.130995	TP53_BI	IL11RA	NO	NA	NA
ENSG00000102034.17;AF:chrX:130081539-130110325:130110497:130081539-130110620:130110716:-	0.145904	TP53_BI	ELF4	NO	NA	NA
ENSG00000035115.22;MX:chr2:242871-243503:243562-247538:242871-244627:244738-247538:-	-0.138668	TP53_BI	SH3YL1	NO	NA	NA
ENSG00000173915.16;SE:chr10:103394394-103395746:103396032-103396409:-	-0.113422	TP53_BI	ATP5MD	NO	NA	NA
ENSG00000149091.15;RI:chr11:46378457:46378500-46378894:46379111:+	0.133819	TP53_BI	DGKZ	NO	NA	NA
ENSG00000148484.18;SE:chr10:16782084-16816973:16817084-16817315:-	0.122626	TP53_BI	RSU1	NO	NA	NA
ENSG00000112977.16;AL:chr5:10683096:10683571-10748175:10733772:10734268-10748175:-	0.136202	TP53_BI	DAP	NO	NA	NA
ENSG00000196655.12;AF:chr11:119018766:119018970-119021760:119019392:119020253-119021760:+	-0.127531	TP53_BI	TRAPPC4	NO	NA	NA
ENSG00000100614.18;AF:chr14:60245785:60246046-60282684:60249221:60249677-60282684:+	-0.259578	TP53_BI	PPM1A	NO	NA	NA
ENSG00000115310.18;AF:chr2:54987698-55010087:55010449:54987698-55049745:55050544:-	0.100431	TP53_BI	RTN4	NO	NA	NA
ENSG00000171552.13;AF:chr20:31722348-31722444:31722548:31722348-31722618:31722860:-	0.1917	TP53_BI	BCL2L1	NO	NA	NA
ENSG00000229117.9;A5:chr12:56117211-56117482:56116799-56117482:+	0.108827	TP53_BI	RPL41	NO	NA	NA
ENSG00000162804.14;SE:chr2:241082364-241087392:241087475-241088365:+	0.181279	TP53_BI	SNED1	NO	NA	NA
ENSG00000136450.13;AL:chr17:58003493:58003718-58004923:58003802:58004001-58004923:-	0.168159	TP53_BI	SRSF1	NO	NA	NA
ENSG00000166508.18;RI:chr7:100099023:100099403-100099589:100099753:-	-0.104675	TP53_BI	MCM7	NO	NA	NA
ENSG00000114062.22;SE:chr15:25405502-25407067:25407262-25409088:-	0.11346	TP53_BI	UBE3A	NO	NA	NA
ENSG00000231074.9;A5:chr6:30296237-30326009:30296237-30326151:-	-0.146005	TP53_BI	HCG18	NO	NA	NA
ENSG00000285437.1;AL:chr7:102562656:102567083-102569835:102567484:102568184-102569835:-	0.119819	TP53_BI	POLR2J3	NO	NA	NA
ENSG00000184220.12;SE:chr3:99818043-100051232:100051306-100146973:+	-0.137427	TP53_BI	CMSS1	NO	NA	NA
ENSG00000249915.8;A5:chr5:306754-311293:304221-311293:+	0.117159	TP53_BI	PDCD6	NO	NA	NA
ENSG00000122359.18;SE:chr10:80176155-80180941:80181455-80205343:-	-0.102718	TP53_BI	ANXA11	NO	NA	NA
ENSG00000115694.15;A5:chr2:241497687-241498235:241497687-241498639:-	0.128101	TP53_BI	STK25	NO	NA	NA
ENSG00000135441.7;AF:chr12:55716038:55716196-55716933:55716292:55716717-55716933:+	0.155061	TP53_BI	BLOC1S1	NO	NA	NA
ENSG00000110066.15;AF:chr11:68190152-68213138:68213286:68190152-68213477:68213828:-	-0.121459	TP53_BI	KMT5B	NO	NA	NA
ENSG00000088038.19;AL:chr19:54153840-54153944:54154455:54153840-54155309:54155680:+	-0.143367	TP53_BI	CNOT3	NO	NA	NA
ENSG00000249859.12;SE:chr8:127939676-127982360:127982479-127983904:+	0.166661	TP53_BI	PVT1	NO	NA	NA
ENSG00000142188.17;AL:chr21:33432798:33432802-33439214:33436884:33436992-33439214:-	-0.10376	TP53_BI	TMEM50B	NO	NA	NA
ENSG00000136856.18;AL:chr9:127404991-127405420:127405469:127404991-127407112:127407898:+	0.115317	TP53_BI	SLC2A8	NO	NA	NA
ENSG00000143549.21;AF:chr1:154173201-154176115:154176242:154173201-154182988:154183147:-	-0.165908	TP53_BI	TPM3	NO	NA	NA
ENSG00000128609.15;SE:chr7:123545676-123550470:123550586-123557404:-	-0.176554	TP53_BI	NDUFA5	NO	NA	NA
ENSG00000169592.15;A5:chr16:30004657-30005221:30001530-30005221:+	0.106523	TP53_BI	INO80E	NO	NA	NA
ENSG00000049323.16;SE:chr2:33315269-33342838:33342963-33347367:+	0.103877	TP53_BI	LTBP1	NO	NA	NA
ENSG00000148019.14;A3:chr9:78248873-78251905:78248873-78251908:+	-0.103288	TP53_BI	CEP78	NO	NA	NA
ENSG00000150967.18;SE:chr12:122940284-122940807:122940995-122944391:-	-0.207393	TP53_BI	ABCB9	NO	NA	NA
ENSG00000137343.18;SE:chr6:30640422-30640535:30640603-30642176:+	0.121184	TP53_BI	ATAT1	NO	NA	NA
ENSG00000136856.18;AL:chr9:127404991-127405420:127405447:127404991-127407112:127407898:+	0.112161	TP53_BI	SLC2A8	NO	NA	NA
ENSG00000066136.20;AF:chr1:40692290:40692347-40738836:40709357:40709616-40738836:+	-0.112694	TP53_BI	NFYC	NO	NA	NA
ENSG00000162804.14;SE:chr2:241071878-241073266:241073364-241081677:+	0.179162	TP53_BI	SNED1	NO	NA	NA
ENSG00000143321.19;AF:chr1:156745373-156751343:156751544:156745373-156752229:156752272:-	0.211546	TP53_BI	HDGF	NO	NA	NA
ENSG00000143761.16;AF:chr1:228082741:228082850-228097078:228090488:228091071-228097078:+	-0.211253	TP53_BI	ARF1	NO	NA	NA
ENSG00000130731.16;SE:chr16:634797-634889:634956-635612:-	0.116719	TP53_BI	METTL26	NO	NA	NA
ENSG00000178982.10;AL:chr19:38626102-38630702:38630968:38626102-38632430:38632900:+	-0.126889	TP53_BI	EIF3K	NO	NA	NA
ENSG00000013561.18;AF:chr5:141969151:141969167-141970704:141969269:141969617-141970704:+	-0.102959	TP53_BI	RNF14	NO	NA	NA
ENSG00000135655.16;SE:chr12:62393202-62396295:62396398-62401187:+	0.113187	TP53_BI	USP15	NO	NA	NA
ENSG00000108107.15;AL:chr19:55388048-55388243:55388343:55388048-55402943:55403250:+	0.131217	TP53_BI	RPL28	NO	NA	NA
ENSG00000066136.20;A3:chr1:40769415-40770397:40769415-40770712:+	0.108995	TP53_BI	NFYC	NO	NA	NA
ENSG00000273841.5;AF:chr5:69366595-69369387:69369477:69366595-69369657:69370013:-	-0.135158	TP53_BI	TAF9	NO	NA	NA
ENSG00000166803.14;SE:chr15:64366075-64373698:64373764-64376743:-	-0.164091	TP53_BI	PCLAF	NO	NA	NA
ENSG00000073060.16;RI:chr12:124782683:124782811-124786357:124786503:-	0.124258	TP53_BI	SCARB1	NO	NA	NA
ENSG00000168958.20;MX:chr2:227340380-227347226:227347384-227355677:227340380-227352514:227352573-227355677:+	0.11058	TP53_BI	MFF	NO	NA	NA
ENSG00000156384.14;AF:chr10:104122058:104122154-104122965:104122165:104122196-104122965:+	0.145571	TP53_BI	SFR1	NO	NA	NA
ENSG00000185104.20;SE:chr1:50441523-50451793:50452193-50475464:-	-0.155635	TP53_BI	FAF1	NO	NA	NA
ENSG00000113851.14;SE:chr3:3174261-3175163:3175266-3179621:-	-0.135586	TP53_BI	CRBN	NO	NA	NA
ENSG00000128951.14;AF:chr15:48331095:48331191-48332268:48331429:48331795-48332268:+	-0.184106	TP53_BI	DUT	NO	NA	NA
ENSG00000116678.20;AL:chr1:65622981-65633152:65635428:65622981-65636191:65641559:+	0.129736	TP53_BI	LEPR	NO	NA	NA
ENSG00000182858.14;A3:chr22:49904066-49904179:49903879-49904179:-	0.108336	TP53_BI	ALG12	NO	NA	NA
ENSG00000285437.1;AL:chr7:102562656:102567083-102569835:102569200:102569543-102569835:-	0.102865	TP53_BI	POLR2J3	NO	NA	NA
ENSG00000138032.21;AL:chr2:44218537-44229993:44231471:44218537-44232316:44232721:+	0.179182	TP53_BI	PPM1B	NO	NA	NA
ENSG00000156030.13;AF:chr14:73740255-73759763:73760298:73740255-73787102:73787258:-	-0.146869	TP53_BI	MIDEAS	NO	NA	NA
ENSG00000105810.10;AF:chr7:92833690-92833873:92833917:92833690-92836478:92836573:-	-0.133669	TP53_BI	CDK6	NO	NA	NA
ENSG00000106615.10;AF:chr7:151491014-151519460:151519895:151491014-151519898:151520120:-	-0.117024	TP53_BI	RHEB	NO	NA	NA
ENSG00000079616.13;A3:chr16:29804065-29804576:29804065-29804814:+	0.166035	TP53_BI	KIF22	NO	NA	NA
ENSG00000140983.14;AF:chr16:668105:668154-668353:668180:668236-668353:+	-0.103562	TP53_BI	RHOT2	NO	NA	NA
ENSG00000154309.9;SE:chr1:222823945-222827428:222827601-222835119:+	0.102205	TP53_BI	DISP1	NO	NA	NA
ENSG00000143761.16;AF:chr1:228082741:228082850-228097078:228083085:228083512-228097078:+	-0.215816	TP53_BI	ARF1	NO	NA	NA
ENSG00000160050.15;RI:chr1:32204598:32204620-32205194:32205387:+	0.141219	TP53_BI	CCDC28B	NO	NA	NA
ENSG00000173221.14;AL:chr5:95813979:95814389-95816507:95814563:95814807-95816507:-	0.165899	TP53_BI	GLRX	NO	NA	NA
ENSG00000173221.14;A3:chr5:95814957-95816507:95814807-95816507:-	0.114162	TP53_BI	GLRX	NO	NA	NA
ENSG00000073060.16;A5:chr12:124778586-124782683:124778586-124786357:-	0.108968	TP53_BI	SCARB1	NO	NA	NA
ENSG00000182196.13;RI:chr12:122982469:122982538-122982620:122982909:+	0.126976	SF3B1_HOT	ARL6IP4	NO	NA	NA
ENSG00000149054.16;AL:chr11:6955782-6956172:6956533:6955782-6988216:6988930:+	0.258447	SF3B1_HOT	ZNF215	NO	NA	NA
ENSG00000149273.15;AL:chr11:75404868-75405614:75406907:75404868-75421727:75422280:+	-0.158743	SF3B1_HOT	RPS3	NO	NA	NA
ENSG00000137496.18;A5:chr11:72001552-72001784:72001424-72001784:+	-0.178172	SF3B1_HOT	IL18BP	NO	NA	NA
ENSG00000214413.9;AF:chr10:110918213-110918845:110918936:110918213-110919121:110919182:-	0.506642	SF3B1_HOT	BBIP1	NO	NA	NA
ENSG00000076554.15;AF:chr8:80064593-80171021:80171200:80064593-80171425:80171558:-	0.1341	SF3B1_HOT	TPD52	NO	NA	NA
ENSG00000081189.16;AF:chr5:88823930-88824310:88824340:88823930-88884489:88884568:-	-0.51708	SF3B1_HOT	MEF2C	NO	NA	NA
ENSG00000116670.15;AF:chr1:11680613-11681039:11681111:11680613-11691413:11691593:-	0.111025	SF3B1_HOT	MAD2L2	NO	NA	NA
ENSG00000186591.13;AF:chr7:129880971-129951278:129951327:129880971-129952503:129952960:-	-0.142462	SF3B1_HOT	UBE2H	NO	NA	NA
ENSG00000179988.14;AF:chr10:122980531:122980695-122983272:122982463:122983024-122983272:+	0.308205	SF3B1_HOT	PSTK	NO	NA	NA
ENSG00000135164.19;A3:chr7:87181341-87182017:87181341-87182056:+	-0.154908	SF3B1_HOT	DMTF1	NO	NA	NA
ENSG00000135953.11;A3:chr2:102732426-102736646:102732409-102736646:-	-0.178793	SF3B1_HOT	MFSD9	NO	NA	NA
ENSG00000103502.14;SE:chr16:29861259-29862586:29862635-29862815:-	-0.260787	SF3B1_HOT	CDIPT	NO	NA	NA
ENSG00000115053.16;AF:chr2:231463316-231463586:231463693:231463316-231482684:231483641:-	0.120025	SF3B1_HOT	NCL	NO	NA	NA
ENSG00000171307.19;A3:chr10:97454799-97455639:97454799-97455660:+	-0.225797	SF3B1_HOT	ZDHHC16	NO	NA	NA
ENSG00000140497.16;AF:chr15:74854649-74872924:74873040:74854649-74873199:74873358:-	0.471246	SF3B1_HOT	SCAMP2	NO	NA	NA
ENSG00000111843.14;SE:chr6:10723241-10724556:10724633-10724961:+	-0.538675	SF3B1_HOT	TMEM14C	NO	NA	NA
ENSG00000171988.19;SE:chr10:63217331-63264651:63264764-63268663:-	0.144909	SF3B1_HOT	JMJD1C	NO	NA	NA
ENSG00000139597.18;SE:chr13:32416703-32420371:32420576-32427904:-	-0.189011	SF3B1_HOT	N4BP2L1	NO	NA	NA
ENSG00000132485.14;A5:chr1:71065137-71065678:71065137-71066776:-	0.124828	SF3B1_HOT	ZRANB2	NO	NA	NA
ENSG00000189403.15;AF:chr13:30463694-30465796:30465914:30463694-30616671:30617597:-	-0.173712	SF3B1_HOT	HMGB1	NO	NA	NA
ENSG00000172575.12;SE:chr15:38502421-38503272:38503376-38505840:-	0.120992	SF3B1_HOT	RASGRP1	NO	NA	NA
ENSG00000110074.11;A3:chr11:126273079-126273316:126273079-126273336:+	-0.106664	SF3B1_HOT	FOXRED1	NO	NA	NA
ENSG00000157617.17;AF:chr21:41922085-41926572:41926690:41922085-41942147:41942160:-	0.304686	SF3B1_HOT	C2CD2	NO	NA	NA
ENSG00000243970.3;AF:chr1:39554392-39556599:39556662:39554392-39558638:39558707:-	0.310477	SF3B1_HOT	PPIEL	NO	NA	NA
ENSG00000187535.14;RI:chr16:1523828:1523956-1524552:1524695:-	-0.104702	SF3B1_HOT	IFT140	NO	NA	NA
ENSG00000108883.13;A5:chr17:44867897-44868287:44867897-44868382:-	0.489585	SF3B1_HOT	EFTUD2	NO	NA	NA
ENSG00000144711.16;AF:chr3:12941865-12986971:12987036:12941865-13022033:13022596:-	0.411373	SF3B1_HOT	IQSEC1	NO	NA	NA
ENSG00000063176.16;A5:chr19:48624855-48625891:48624430-48625891:+	0.513811	SF3B1_HOT	SPHK2	NO	NA	NA
ENSG00000141644.17;A3:chr18:50271540-50272677:50269818-50272677:-	0.133406	SF3B1_HOT	MBD1	NO	NA	NA
ENSG00000103502.14;A5:chr16:29861259-29862586:29861259-29862815:-	-0.187646	SF3B1_HOT	CDIPT	NO	NA	NA
ENSG00000075711.21;MX:chr3:197069260-197075837:197075870-197081051:197069260-197076586:197076685-197081051:-	0.144297	SF3B1_HOT	DLG1	NO	NA	NA
ENSG00000169093.16;AF:chrX:1442317-1452748:1452872:1442317-1453618:1453762:-	0.365186	SF3B1_HOT	ASMTL	NO	NA	NA
ENSG00000198131.14;AL:chr19:58246794-58247282:58247611:58246794-58260851:58263190:+	-0.419986	SF3B1_HOT	ZNF544	NO	NA	NA
ENSG00000167930.17;A3:chr16:249654-254329:249654-254388:+	0.212874	SF3B1_HOT	FAM234A	NO	NA	NA
ENSG00000255717.7;SE:chr11:62854064-62854519:62854551-62855133:-	0.429858	SF3B1_HOT	SNHG1	NO	NA	NA
ENSG00000002330.14;AF:chr11:64271803-64272719:64272856:64271803-64284182:64284639:-	-0.354375	SF3B1_HOT	BAD	NO	NA	NA
ENSG00000225470.8;SE:chrX:73947374-73994840:73994961-73998768:+	-0.496264	SF3B1_HOT	JPX	NO	NA	NA
ENSG00000120992.18;AF:chr8:54100939-54101350:54101554:54100939-54101755:54102017:-	0.430138	SF3B1_HOT	LYPLA1	NO	NA	NA
ENSG00000168421.13;AF:chr4:40193649:40193812-40242714:40197245:40197300-40242714:+	-0.345419	SF3B1_HOT	RHOH	NO	NA	NA
ENSG00000144591.19;A3:chr2:219498938-219499956:219498938-219499961:+	-0.167949	SF3B1_HOT	GMPPA	NO	NA	NA
ENSG00000163660.12;AL:chr3:157146508:157146607-157149287:157148316:157148589-157149287:-	0.221422	SF3B1_HOT	CCNL1	NO	NA	NA
ENSG00000077152.11;A5:chr1:202333555-202334989:202333555-202335642:-	-0.453217	SF3B1_HOT	UBE2T	NO	NA	NA
ENSG00000078319.10;AL:chr7:100328684:100329194-100330463:100330208:100330284-100330463:-	-0.534126	SF3B1_HOT	PMS2P1	NO	NA	NA
ENSG00000203875.13;SE:chr6:85677492-85677791:85677875-85677954:-	-0.168551	SF3B1_HOT	SNHG5	NO	NA	NA
ENSG00000080845.17;AF:chr20:36461478:36461510-36496705:36461747:36462599-36496705:+	-0.157732	SF3B1_HOT	DLGAP4	NO	NA	NA
ENSG00000183696.14;SE:chr7:48101870-48103297:48103411-48106873:+	0.431859	SF3B1_HOT	UPP1	NO	NA	NA
ENSG00000122482.21;AF:chr1:90982370-91021273:91021473:90982370-91021990:91022272:-	-0.279891	SF3B1_HOT	ZNF644	NO	NA	NA
ENSG00000143409.15;A3:chr1:151002968-151006312:151002323-151006312:-	0.102011	SF3B1_HOT	MINDY1	NO	NA	NA
ENSG00000005238.20;AF:chr9:35108737-35112330:35112392:35108737-35115671:35115862:-	-0.383265	SF3B1_HOT	FAM214B	NO	NA	NA
ENSG00000081307.13;AL:chr3:132675923-132676443:132676541:132675923-132676855:132677189:+	-0.209224	SF3B1_HOT	UBA5	NO	NA	NA
ENSG00000187742.15;A3:chr9:89319797-89325427:89319797-89325548:+	0.161326	SF3B1_HOT	SECISBP2	NO	NA	NA
ENSG00000170946.15;AL:chr11:31370859-31384594:31385100:31370859-31414811:31417338:+	-0.241932	SF3B1_HOT	DNAJC24	NO	NA	NA
ENSG00000164924.18;AF:chr8:100948900-100951235:100951449:100948900-100951929:100951969:-	0.232466	SF3B1_HOT	YWHAZ	NO	NA	NA
ENSG00000147789.15;AL:chr8:144837507-144841355:144841579:144837507-144845979:144847509:+	0.34299	SF3B1_HOT	ZNF7	NO	NA	NA
ENSG00000132254.12;A3:chr11:6480463-6481231:6480068-6481231:-	-0.132364	SF3B1_HOT	ARFIP2	NO	NA	NA
ENSG00000135486.18;AF:chr12:54280763:54280822-54281386:54281006:54281094-54281386:+	0.2118	SF3B1_HOT	HNRNPA1	NO	NA	NA
ENSG00000166508.18;AF:chr7:100100093-100100213:100100780:100100093-100101264:100101940:-	-0.504938	SF3B1_HOT	MCM7	NO	NA	NA
ENSG00000156976.17;A3:chr3:186787264-186787495:186787264-186787803:+	-0.24652	SF3B1_HOT	EIF4A2	NO	NA	NA
ENSG00000196150.13;AF:chr8:144890403-144901399:144901479:144890403-144901749:144902168:-	0.120784	SF3B1_HOT	ZNF250	NO	NA	NA
ENSG00000110074.11;AF:chr11:126269194:126269415-126272969:126270945:126271657-126272969:+	-0.21655	SF3B1_HOT	FOXRED1	NO	NA	NA
ENSG00000095397.16;AF:chr9:114478771-114503107:114503173:114478771-114504184:114505450:-	0.331288	SF3B1_HOT	WHRN	NO	NA	NA
ENSG00000133460.19;AF:chr22:23856957:23856991-23862104:23857471:23857531-23862104:+	0.555456	SF3B1_HOT	SLC2A11	NO	NA	NA
ENSG00000100889.12;SE:chr14:24098678-24099049:24099247-24099558:+	0.319596	SF3B1_HOT	PCK2	NO	NA	NA
ENSG00000179943.8;AF:chr19:55597901-55598495:55598788:55597901-55599474:55599517:-	-0.155766	SF3B1_HOT	FIZ1	NO	NA	NA
ENSG00000164924.18;AF:chr8:100948900-100951235:100951449:100948900-100951929:100952020:-	0.304076	SF3B1_HOT	YWHAZ	NO	NA	NA
ENSG00000140521.16;A5:chr15:89317536-89317939:89317536-89318541:-	-0.166775	SF3B1_HOT	POLG	NO	NA	NA
ENSG00000108946.15;AF:chr17:68512379:68512579-68515394:68512882:68512978-68515394:+	-0.378434	SF3B1_HOT	PRKAR1A	NO	NA	NA
ENSG00000004866.21;MX:chr7:117209937-117219084:117219176-117229762:117209937-117221923:117222062-117229762:+	0.153304	SF3B1_HOT	ST7	NO	NA	NA
ENSG00000028310.18;SE:chr5:865581-869245:869404-870473:-	-0.253512	SF3B1_HOT	BRD9	NO	NA	NA
ENSG00000116809.12;A3:chr1:15942441-15942529:15942420-15942529:-	-0.159645	SF3B1_HOT	ZBTB17	NO	NA	NA
ENSG00000038358.15;SE:chr16:67873343-67875738:67875837-67875945:+	-0.118686	SF3B1_HOT	EDC4	NO	NA	NA
ENSG00000048405.10;AL:chr7:127346790:127348043-127373342:127370043:127371814-127373342:-	0.127331	SF3B1_HOT	ZNF800	NO	NA	NA
ENSG00000137171.15;AF:chr6:43059653:43059685-43061311:43059890:43060605-43061311:+	-0.176361	SF3B1_HOT	KLC4	NO	NA	NA
ENSG00000127586.17;A3:chr16:793274-794040:793274-794054:+	-0.257305	SF3B1_HOT	CHTF18	NO	NA	NA
ENSG00000188785.12;AF:chr19:57389875:57390114-57394188:57390453:57390845-57394188:+	-0.388366	SF3B1_HOT	ZNF548	NO	NA	NA
ENSG00000248309.7;AF:chr5:88883417:88883485-88905209:88889335:88889480-88905209:+	0.263157	SF3B1_HOT	MEF2C-AS1	NO	NA	NA
ENSG00000103168.16;A3:chr16:84184989-84186901:84184899-84186901:-	0.231395	SF3B1_HOT	TAF1C	NO	NA	NA
ENSG00000120008.16;SE:chr10:120866764-120867066:120867169-120871170:+	0.113793	SF3B1_HOT	WDR11	NO	NA	NA
ENSG00000120832.10;A3:chr12:106985225-106986969:106985215-106986969:-	0.275461	SF3B1_HOT	MTERF2	NO	NA	NA
ENSG00000069424.15;AF:chr1:5992262:5992788-6040517:6026276:6026445-6040517:+	0.164689	SF3B1_HOT	KCNAB2	NO	NA	NA
ENSG00000112584.14;AF:chr6:170295321:170295453-170317370:170306758:170306842-170317370:+	0.37085	SF3B1_HOT	FAM120B	NO	NA	NA
ENSG00000111679.17;AF:chr12:6946577:6946739-6951609:6951372:6951520-6951609:+	0.127264	SF3B1_HOT	PTPN6	NO	NA	NA
ENSG00000161204.11;RI:chr3:184187664:184187761-184187861:184187983:+	-0.140689	SF3B1_HOT	ABCF3	NO	NA	NA
ENSG00000214413.9;AF:chr10:110918213-110918845:110918936:110918213-110919121:110919167:-	0.621921	SF3B1_HOT	BBIP1	NO	NA	NA
ENSG00000145191.15;RI:chr3:184143442:184143565-184144079:184144224:+	0.120263	SF3B1_HOT	EIF2B5	NO	NA	NA
ENSG00000144711.16;AF:chr3:12941865-13022033:13022596:12941865-13072992:13073429:-	-0.100148	SF3B1_HOT	IQSEC1	NO	NA	NA
ENSG00000165782.11;RI:chr14:20457858:20458702-20459206:20459296:-	-0.103617	SF3B1_HOT	PIP4P1	NO	NA	NA
ENSG00000166598.15;AL:chr12:103947430-103947633:103947927:103947430-103953386:103953645:+	-0.426834	SF3B1_HOT	HSP90B1	NO	NA	NA
ENSG00000131748.16;A5:chr17:39653195-39653481:39653158-39653481:+	0.261186	SF3B1_HOT	STARD3	NO	NA	NA
ENSG00000142864.14;A3:chr1:67424322-67424888:67424277-67424888:-	0.112244	SF3B1_HOT	SERBP1	NO	NA	NA
ENSG00000140157.15;SE:chr15:22838947-22839655:22839790-22845146:+	0.46876	SF3B1_HOT	NIPA2	NO	NA	NA
ENSG00000111596.13;MX:chr12:70278274-70294237:70294294-70310895:70278274-70301705:70301865-70310895:+	0.428803	SF3B1_HOT	CNOT2	NO	NA	NA
ENSG00000171566.12;SE:chr4:154536744-154537286:154537479-154537969:-	0.140893	SF3B1_HOT	PLRG1	NO	NA	NA
ENSG00000176715.17;AL:chr16:89146049-89151028:89151348:89146049-89154090:89156233:+	-0.306632	SF3B1_HOT	ACSF3	NO	NA	NA
ENSG00000159720.12;A3:chr16:67452426-67453544:67452360-67453544:-	0.387145	SF3B1_HOT	ATP6V0D1	NO	NA	NA
ENSG00000015676.18;SE:chr7:44485284-44485531:44485622-44490409:-	0.199602	SF3B1_HOT	NUDCD3	NO	NA	NA
ENSG00000075711.21;AF:chr3:197297235-197297353:197297523:197297235-197297673:197298115:-	-0.411126	SF3B1_HOT	DLG1	NO	NA	NA
ENSG00000143442.22;AF:chr1:151442205-151442305:151442478:151442205-151459152:151459494:-	-0.252669	SF3B1_HOT	POGZ	NO	NA	NA
ENSG00000134369.15;SE:chr1:201786577-201788468:201788638-201789740:+	-0.149326	SF3B1_HOT	NAV1	NO	NA	NA
ENSG00000197111.16;A3:chr12:53459403-53459800:53459403-53460331:+	-0.126151	SF3B1_HOT	PCBP2	NO	NA	NA
ENSG00000138032.21;AL:chr2:44218537-44229993:44231471:44218537-44232316:44234646:+	-0.141515	SF3B1_HOT	PPM1B	NO	NA	NA
ENSG00000198860.13;AL:chr1:184054863-184070616:184071220:184054863-184072157:184074127:+	0.268784	SF3B1_HOT	TSEN15	NO	NA	NA
ENSG00000168517.10;AF:chr17:45160700:45160943-45162488:45161845:45162031-45162488:+	-0.185659	SF3B1_HOT	HEXIM2	NO	NA	NA
ENSG00000075711.21;A3:chr3:197065464-197065708:197065448-197065708:-	-0.106949	SF3B1_HOT	DLG1	NO	NA	NA
ENSG00000255717.7;RI:chr11:62853075:62853115-62853552:62853590:-	-0.11938	SF3B1_HOT	SNHG1	NO	NA	NA
ENSG00000171634.18;A5:chr17:67946325-67947726:67945896-67947726:+	-0.177333	SF3B1_HOT	BPTF	NO	NA	NA
ENSG00000204410.16;A3:chr6:31744025-31744139:31744025-31744190:+	0.109682	SF3B1_HOT	MSH5	NO	NA	NA
ENSG00000167674.15;AL:chr19:4501317-4501462:4501578:4501317-4501911:4502201:+	-0.156538	SF3B1_HOT	HDGFL2	NO	NA	NA
ENSG00000169241.19;AF:chr1:155135391:155135680-155136299:155135897:155135991-155136299:+	0.306196	SF3B1_HOT	SLC50A1	NO	NA	NA
ENSG00000232931.6;AF:chr2:95814145-95814671:95815790:95814145-95816724:95819724:-	-0.224792	SF3B1_HOT	LINC00342	NO	NA	NA
ENSG00000150433.9;A3:chr11:125102351-125102637:125102317-125102637:-	-0.232872	SF3B1_HOT	TMEM218	NO	NA	NA
ENSG00000147854.17;SE:chr9:6493932-6495585:6497103-6497198:+	-0.11483	SF3B1_HOT	UHRF2	NO	NA	NA
ENSG00000136758.19;SE:chr10:27145590-27147498:27147668-27148906:-	-0.193138	SF3B1_HOT	YME1L1	NO	NA	NA
ENSG00000183010.17;A5:chr17:81936861-81937180:81936861-81937228:-	-0.38081	SF3B1_HOT	PYCR1	NO	NA	NA
ENSG00000115525.18;AF:chr2:85863485-85888228:85888401:85863485-85888824:85888990:-	-0.743348	SF3B1_HOT	ST3GAL5	NO	NA	NA
ENSG00000073605.18;SE:chr17:39906271-39906961:39906987-39908958:-	0.286655	SF3B1_HOT	GSDMB	NO	NA	NA
ENSG00000104299.15;A3:chr8:28768376-28769889:28768322-28769889:-	-0.177223	SF3B1_HOT	INTS9	NO	NA	NA
ENSG00000172824.16;A5:chr16:67001002-67001308:67000990-67001308:+	-0.14092	SF3B1_HOT	CES4A	NO	NA	NA
ENSG00000099622.14;AF:chr19:1259384:1259638-1270928:1269347:1269410-1270928:+	-0.499703	SF3B1_HOT	CIRBP	NO	NA	NA
ENSG00000160953.16;AF:chr19:1372099:1373160-1376519:1373507:1374049-1376519:+	-0.282575	SF3B1_HOT	PWWP3A	NO	NA	NA
ENSG00000112983.18;SE:chr5:138157267-138159555:138159599-138160069:-	0.144503	SF3B1_HOT	BRD8	NO	NA	NA
ENSG00000087460.26;AF:chr20:58891760:58891865-58895612:58892333:58892506-58895612:+	-0.284393	SF3B1_HOT	GNAS	NO	NA	NA
ENSG00000172775.17;A5:chr16:57173869-57185821:57173869-57185825:-	-0.145372	SF3B1_HOT	PSME3IP1	NO	NA	NA
ENSG00000135930.14;AL:chr2:232556530-232557529:232557648:232556530-232557884:232558824:+	-0.156409	SF3B1_HOT	EIF4E2	NO	NA	NA
ENSG00000135164.19;AF:chr7:87152436:87152555-87154390:87152613:87152944-87154390:+	0.484735	SF3B1_HOT	DMTF1	NO	NA	NA
ENSG00000110063.10;AF:chr11:126331404:126331550-126343307:126336414:126338399-126343307:+	-0.625431	SF3B1_HOT	DCPS	NO	NA	NA
ENSG00000145730.20;MX:chr5:103019843-103025131:103025334-103028887:103019843-103028185:103028238-103028887:+	-0.189818	SF3B1_HOT	PAM	NO	NA	NA
ENSG00000163832.16;AF:chr3:47511226-47512992:47513381:47511226-47513537:47513709:-	0.208023	SF3B1_HOT	ELP6	NO	NA	NA
ENSG00000197471.12;AF:chr16:29662979:29663080-29663695:29663219:29663316-29663695:+	-0.63188	SF3B1_HOT	SPN	NO	NA	NA
ENSG00000173992.9;RI:chr11:66599116:66599253-66599459:66599636:+	0.103684	SF3B1_HOT	CCS	NO	NA	NA
ENSG00000076984.18;SE:chr19:7904068-7904451:7904548-7905808:+	-0.1463	SF3B1_HOT	MAP2K7	NO	NA	NA
ENSG00000130734.10;A5:chr19:10544325-10544709:10544320-10544709:+	0.237233	SF3B1_HOT	ATG4D	NO	NA	NA
ENSG00000081189.16;AL:chr5:88722498:88722827-88728493:88722837:88722925-88728493:-	0.162781	SF3B1_HOT	MEF2C	NO	NA	NA
ENSG00000143786.8;SE:chr1:224435187-224513781:224513936-224515741:+	-0.221494	SF3B1_HOT	CNIH3	NO	NA	NA
ENSG00000155366.17;SE:chr1:112703806-112705100:112705123-112707078:-	0.353127	SF3B1_HOT	RHOC	NO	NA	NA
ENSG00000144451.19;SE:chr2:213297357-213317219:213317356-213340163:+	0.484907	SF3B1_HOT	SPAG16	NO	NA	NA
ENSG00000172915.18;SE:chr13:35164509-35168987:35168995-35171272:+	-0.217635	SF3B1_HOT	NBEA	NO	NA	NA
ENSG00000034152.19;MX:chr17:21284969-21295675:21295769-21298413:21284969-21296086:21296210-21298413:+	-0.30155	SF3B1_HOT	MAP2K3	NO	NA	NA
ENSG00000187091.14;AF:chr3:38020352-38024156:38024576:38020352-38029506:38029559:-	0.127957	SF3B1_HOT	PLCD1	NO	NA	NA
ENSG00000136161.12;SE:chr13:48502914-48510629:48510771-48511770:-	0.191015	SF3B1_HOT	RCBTB2	NO	NA	NA
ENSG00000051382.9;SE:chr3:138759359-138770051:138770117-138796463:-	0.223563	SF3B1_HOT	PIK3CB	NO	NA	NA
ENSG00000116584.20;AF:chr1:155969300-155969969:155971063:155969300-155978913:155979099:-	-0.285689	SF3B1_HOT	ARHGEF2	NO	NA	NA
ENSG00000124214.19;A3:chr20:49124605-49135833:49124587-49135833:-	-0.13558	SF3B1_HOT	STAU1	NO	NA	NA
ENSG00000113742.14;AF:chr5:173890674:173890858-173910523:173893051:173893183-173910523:+	-0.197377	SF3B1_HOT	CPEB4	NO	NA	NA
ENSG00000145979.18;A5:chr6:13326906-13327833:13326906-13328296:-	-0.101714	SF3B1_HOT	TBC1D7	NO	NA	NA
ENSG00000116750.13;AL:chr1:193015759:193016395-193021097:193018405:193018820-193021097:-	0.482107	SF3B1_HOT	UCHL5	NO	NA	NA
ENSG00000108443.14;SE:chr17:59912804-59914635:59914703-59926435:+	-0.20571	SF3B1_HOT	RPS6KB1	NO	NA	NA
ENSG00000120071.14;AF:chr17:46172232-46192419:46192800:46172232-46223671:46223685:-	0.22828	SF3B1_HOT	KANSL1	NO	NA	NA
ENSG00000196655.12;AL:chr11:119021886-119023010:119023282:119021886-119024857:119025454:+	-0.216502	SF3B1_HOT	TRAPPC4	NO	NA	NA
ENSG00000116161.18;SE:chr1:174999689-175000089:175000195-175004614:+	0.281689	SF3B1_HOT	CACYBP	NO	NA	NA
ENSG00000123600.20;A5:chr2:171330698-171331765:171330698-171331804:-	0.272486	SF3B1_HOT	METTL8	NO	NA	NA
ENSG00000198732.11;A3:chr14:70023447-70030242:70023447-70030245:+	-0.102727	SF3B1_HOT	SMOC1	NO	NA	NA
ENSG00000100926.15;A5:chr14:24195036-24195309:24195036-24195550:-	0.192508	SF3B1_HOT	TM9SF1	NO	NA	NA
ENSG00000164405.11;SE:chr5:132866687-132866869:132867035-132867488:+	0.154234	SF3B1_HOT	UQCRQ	NO	NA	NA
ENSG00000110801.14;SE:chr12:121894841-121899634:121899889-121903006:+	-0.485343	SF3B1_HOT	PSMD9	NO	NA	NA
ENSG00000166508.18;AF:chr7:100100093-100100213:100100780:100100093-100101264:100101409:-	-0.439124	SF3B1_HOT	MCM7	NO	NA	NA
ENSG00000160991.16;SE:chr7:102433661-102436202:102436333-102438944:+	-0.648032	SF3B1_HOT	ORAI2	NO	NA	NA
ENSG00000110921.14;SE:chr12:109576145-109579165:109579282-109579802:+	-0.138711	SF3B1_HOT	MVK	NO	NA	NA
ENSG00000224870.7;RI:chr1:1399520:1399689-1400158:1400303:+	-0.284452	SF3B1_HOT	MRPL20-AS1	NO	NA	NA
ENSG00000116750.13;SE:chr1:193016395-193020307:193020381-193021097:-	-0.125752	SF3B1_HOT	UCHL5	NO	NA	NA
ENSG00000205572.10;AL:chr5:70026515-70032315:70032694:70026515-70041524:70042008:+	-0.291906	SF3B1_HOT	SERF1B	NO	NA	NA
ENSG00000004975.12;A3:chr17:7227783-7227977:7227711-7227977:-	0.127978	SF3B1_HOT	DVL2	NO	NA	NA
ENSG00000250571.7;AF:chr8:143267434:143267484-143274704:143269358:143269520-143274704:+	-0.312062	SF3B1_HOT	GLI4	NO	NA	NA
ENSG00000198131.14;AL:chr19:58246794-58247282:58247328:58246794-58260851:58263190:+	-0.367695	SF3B1_HOT	ZNF544	NO	NA	NA
ENSG00000165966.16;SE:chr12:41438013-41459951:41460070-41506456:+	-0.259244	SF3B1_HOT	PDZRN4	NO	NA	NA
ENSG00000160710.17;AF:chr1:154602626-154607992:154608186:154602626-154627954:154627986:-	-0.151054	SF3B1_HOT	ADAR	NO	NA	NA
ENSG00000029639.11;A3:chr6:155260568-155285158:155260400-155285158:-	-0.169667	SF3B1_HOT	TFB1M	NO	NA	NA
ENSG00000169567.13;SE:chr5:131162676-131163331:131163492-131164305:-	-0.164921	SF3B1_HOT	HINT1	NO	NA	NA
ENSG00000130396.20;A5:chr6:167943194-167943402:167943191-167943402:+	-0.208204	SF3B1_HOT	AFDN	NO	NA	NA
ENSG00000136527.18;AF:chr3:185925626-185926601:185929073:185925626-185937825:185938103:-	-0.164728	SF3B1_HOT	TRA2B	NO	NA	NA
ENSG00000164054.15;RI:chr3:48467876:48468217-48469361:48469573:-	-0.267697	SF3B1_HOT	SHISA5	NO	NA	NA
ENSG00000121940.16;A3:chr1:108938308-108939636:108938216-108939636:-	0.452777	SF3B1_HOT	CLCC1	NO	NA	NA
ENSG00000143774.16;AF:chr1:228140302:228140363-228145511:228141132:228141288-228145511:+	-0.718846	SF3B1_HOT	GUK1	NO	NA	NA
ENSG00000228060.3;SE:chr1:39565219-39566583:39566674-39570480:+	-0.149098	SF3B1_HOT	PABPC4-AS1	NO	NA	NA
ENSG00000187555.16;AF:chr16:8930397-8936583:8936729:8930397-8963207:8963906:-	0.573639	SF3B1_HOT	USP7	NO	NA	NA
ENSG00000175309.15;AL:chr5:178226466:178226698-178229940:178228125:178228589-178229940:-	-0.109208	SF3B1_HOT	PHYKPL	NO	NA	NA
ENSG00000132507.18;AF:chr17:7307582:7307752-7309615:7307974:7308113-7309615:+	-0.153974	SF3B1_HOT	EIF5A	NO	NA	NA
ENSG00000166508.18;AF:chr7:100100093-100100213:100100757:100100093-100101264:100101409:-	0.329945	SF3B1_HOT	MCM7	NO	NA	NA
ENSG00000162777.17;AF:chr1:111199798-111200393:111200546:111199798-111204296:111204409:-	-0.102568	SF3B1_HOT	DENND2D	NO	NA	NA
ENSG00000251301.7;AF:chr12:68333664-68335655:68335781:68333664-68442064:68442216:-	-0.301961	SF3B1_HOT	LINC02384	NO	NA	NA
ENSG00000160710.17;AF:chr1:154602626-154607992:154608170:154602626-154627954:154628004:-	0.249097	SF3B1_HOT	ADAR	NO	NA	NA
ENSG00000124508.17;A5:chr6:26383244-26383792:26383181-26383792:+	0.160398	SF3B1_HOT	BTN2A2	NO	NA	NA
ENSG00000148842.18;SE:chr10:103068722-103071774:103071839-103076086:+	-0.215468	SF3B1_HOT	CNNM2	NO	NA	NA
ENSG00000169567.13;AF:chr5:131162676-131164305:131164496:131162676-131165060:131165333:-	0.206194	SF3B1_HOT	HINT1	NO	NA	NA
ENSG00000163681.16;SE:chr3:57865292-57871636:57871698-57890041:+	-0.199387	SF3B1_HOT	SLMAP	NO	NA	NA
ENSG00000113621.15;SE:chr5:134874530-134887695:134888182-134893492:+	-0.229207	SF3B1_HOT	TXNDC15	NO	NA	NA
ENSG00000113108.19;A3:chr5:140561722-140561844:140561701-140561844:-	-0.188991	SF3B1_HOT	APBB3	NO	NA	NA
ENSG00000141644.17;AF:chr18:50280017-50281363:50281476:50280017-50281575:50281767:-	-0.129531	SF3B1_HOT	MBD1	NO	NA	NA
ENSG00000073921.18;A3:chr11:85990399-85996826:85990378-85996826:-	-0.184671	SF3B1_HOT	PICALM	NO	NA	NA
ENSG00000093072.18;SE:chr22:17207290-17209356:17209598-17219356:-	0.524501	SF3B1_HOT	ADA2	NO	NA	NA
ENSG00000204371.11;SE:chr6:31888747-31888969:31889070-31889228:-	0.134381	SF3B1_HOT	EHMT2	NO	NA	NA
ENSG00000175582.20;MX:chr11:73716362-73718613:73718718-73720846:73716362-73718785:73718890-73720846:-	-0.128797	SF3B1_HOT	RAB6A	NO	NA	NA
ENSG00000113456.19;SE:chr5:34913578-34913927:34914026-34914695:-	0.170473	SF3B1_HOT	RAD1	NO	NA	NA
ENSG00000126602.11;AL:chr16:3674336:3674494-3675324:3674656:3674905-3675324:-	0.255921	SF3B1_HOT	TRAP1	NO	NA	NA
ENSG00000093010.14;SE:chr22:19961289-19961697:19961874-19962527:+	-0.253636	SF3B1_HOT	COMT	NO	NA	NA
ENSG00000160908.15;SE:chr7:99494631-99498716:99498842-99499638:-	0.218648	SF3B1_HOT	ZNF394	NO	NA	NA
ENSG00000062194.16;SE:chr5:57214193-57221376:57221396-57230846:+	-0.12333	SF3B1_HOT	GPBP1	NO	NA	NA
ENSG00000105974.12;A5:chr7:116525805-116526525:116525092-116526525:+	-0.551425	SF3B1_HOT	CAV1	NO	NA	NA
ENSG00000163138.19;AF:chr4:20696282:20696513-20704466:20700458:20700611-20704466:+	-0.185697	SF3B1_HOT	PACRGL	NO	NA	NA
ENSG00000130299.17;AF:chr19:17336692:17337157-17338008:17337559:17337576-17338008:+	0.370676	SF3B1_HOT	GTPBP3	NO	NA	NA
ENSG00000161558.11;SE:chr19:48345354-48360072:48360176-48363291:-	-0.132688	SF3B1_HOT	TMEM143	NO	NA	NA
ENSG00000010278.14;SE:chr12:6232729-6232937:6233005-6233412:+	0.102327	SF3B1_HOT	CD9	NO	NA	NA
ENSG00000215012.9;A5:chr22:19854539-19854660:19854539-19854820:-	0.310504	SF3B1_HOT	RTL10	NO	NA	NA
ENSG00000047315.17;SE:chr4:56986426-56990748:56990898-56994404:+	0.125979	SF3B1_HOT	POLR2B	NO	NA	NA
ENSG00000131373.15;SE:chr3:15582989-15585248:15585342-15589540:-	-0.397521	SF3B1_HOT	HACL1	NO	NA	NA
ENSG00000112983.18;SE:chr5:138166108-138166518:138166727-138167934:-	0.129658	SF3B1_HOT	BRD8	NO	NA	NA
ENSG00000144535.20;A3:chr2:232335874-232336141:232335874-232336469:+	-0.229534	SF3B1_HOT	DIS3L2	NO	NA	NA
ENSG00000101972.19;AF:chrX:123960519:123960866-124022531:123961739:123961856-124022531:+	0.162598	SF3B1_HOT	STAG2	NO	NA	NA
ENSG00000163138.19;SE:chr4:20704814-20709683:20709773-20712788:+	-0.304587	SF3B1_HOT	PACRGL	NO	NA	NA
ENSG00000135446.17;AF:chr12:57751736-57751913:57752115:57751736-57752175:57752364:-	-0.164399	SF3B1_HOT	CDK4	NO	NA	NA
ENSG00000110075.14;SE:chr11:68564432-68566999:68567166-68569748:+	-0.452936	SF3B1_HOT	PPP6R3	NO	NA	NA
ENSG00000135070.15;AL:chr9:86265679:86266191-86272007:86266863:86267805-86272007:-	0.26056	SF3B1_HOT	ISCA1	NO	NA	NA
ENSG00000117139.18;AF:chr1:202777094-202807963:202808049:202777094-202808102:202808433:-	-0.526516	SF3B1_HOT	KDM5B	NO	NA	NA
ENSG00000051825.15;A5:chr12:123161383-123162115:123161383-123163014:-	-0.191014	SF3B1_HOT	MPHOSPH9	NO	NA	NA
ENSG00000137411.19;A5:chr6:30914469-30914805:30914344-30914805:+	0.184494	SF3B1_HOT	VARS2	NO	NA	NA
ENSG00000105221.18;SE:chr19:40238973-40240045:40240121-40241938:-	-0.527096	SF3B1_HOT	AKT2	NO	NA	NA
ENSG00000119185.13;AF:chr2:9420100-9422479:9423229:9420100-9423373:9423480:-	0.186579	SF3B1_HOT	ITGB1BP1	NO	NA	NA
ENSG00000114745.13;AF:chr3:39103553-39106988:39107336:39103553-39107479:39107633:-	0.196907	SF3B1_HOT	GORASP1	NO	NA	NA
ENSG00000168300.14;AL:chr8:51817583:51820718-51831444:51826929:51827361-51831444:-	0.11535	SF3B1_HOT	PCMTD1	NO	NA	NA
ENSG00000100926.15;AF:chr14:24195036-24195346:24195441:24195036-24195550:24195687:-	0.155294	SF3B1_HOT	TM9SF1	NO	NA	NA
ENSG00000214063.11;AF:chr11:842812:842915-850288:847197:847300-850288:+	-0.459441	SF3B1_HOT	TSPAN4	NO	NA	NA
ENSG00000057608.17;A3:chr10:5766638-5768213:5766295-5768213:-	-0.174753	SF3B1_HOT	GDI2	NO	NA	NA
ENSG00000133460.19;AF:chr22:23856934:23856991-23862104:23857471:23857531-23862104:+	0.450491	SF3B1_HOT	SLC2A11	NO	NA	NA
ENSG00000160813.7;A5:chr7:100435533-100435631:100435533-100435848:-	-0.106183	SF3B1_HOT	PPP1R35	NO	NA	NA
ENSG00000276045.3;RI:chr12:121626550:121626865-121626871:121627050:+	-0.120179	SF3B1_HOT	ORAI1	NO	NA	NA
ENSG00000169020.10;AF:chr4:673401-673507:673821:673401-673912:674121:-	-0.175814	SF3B1_HOT	ATP5ME	NO	NA	NA
ENSG00000177943.14;RI:chr9:136856464:136856575-136856710:136856826:+	0.153734	SF3B1_HOT	MAMDC4	NO	NA	NA
ENSG00000183955.13;SE:chr12:123384208-123389433:123389554-123390630:+	-0.110596	SF3B1_HOT	KMT5A	NO	NA	NA
ENSG00000197363.9;AL:chr8:144804238-144807191:144809144:144804238-144810106:144811169:+	-0.112027	SF3B1_HOT	ZNF517	NO	NA	NA
ENSG00000135185.12;AF:chr7:87199057-87202964:87203043:87199057-87219426:87219626:-	-0.158656	SF3B1_HOT	TMEM243	NO	NA	NA
ENSG00000073060.16;A5:chr12:124778586-124782683:124778586-124786357:-	0.288539	SF3B1_HOT	SCARB1	NO	NA	NA
ENSG00000121578.13;AL:chr3:119229975:119230244-119236853:119236215:119236251-119236853:-	0.436752	SF3B1_HOT	B4GALT4	NO	NA	NA
ENSG00000110074.11;A3:chr11:126273454-126274927:126273454-126275327:+	-0.194385	SF3B1_HOT	FOXRED1	NO	NA	NA
ENSG00000158985.13;AF:chr5:131245493:131245599-131255095:131253053:131253129-131255095:+	0.36067	SF3B1_HOT	CDC42SE2	NO	NA	NA
ENSG00000139725.8;AF:chr12:121793239-121793496:121793688:121793239-121799847:121800677:-	-0.36437	SF3B1_HOT	RHOF	NO	NA	NA
ENSG00000167186.11;AF:chr16:19067661:19067737-19071928:19067924:19068230-19071928:+	-0.55385	SF3B1_HOT	COQ7	NO	NA	NA
ENSG00000168421.13;AF:chr4:40193649:40193812-40242714:40197031:40197300-40242714:+	-0.343893	SF3B1_HOT	RHOH	NO	NA	NA
ENSG00000118482.12;SE:chr6:63646795-63678828:63679020-63680000:+	0.652977	SF3B1_HOT	PHF3	NO	NA	NA
ENSG00000164924.18;AF:chr8:100948900-100951456:100951595:100948900-100951929:100951969:-	-0.220685	SF3B1_HOT	YWHAZ	NO	NA	NA
ENSG00000198874.13;AF:chr7:66995173:66995497-66998065:66996833:66996982-66998065:+	-0.263867	SF3B1_HOT	TYW1	NO	NA	NA
ENSG00000153815.16;AF:chr16:81645358:81645598-81652203:81651191:81651427-81652203:+	0.503693	SF3B1_HOT	CMIP	NO	NA	NA
ENSG00000120709.11;A3:chr5:138338307-138341184:138338307-138341809:+	-0.181616	SF3B1_HOT	FAM53C	NO	NA	NA
ENSG00000259024.6;SE:chr17:15547148-15553685:15553829-15555282:-	0.128723	SF3B1_HOT	TVP23C-CDRT4	NO	NA	NA
ENSG00000121964.14;SE:chr2:143952843-143957195:143957339-143970653:-	-0.141335	SF3B1_HOT	GTDC1	NO	NA	NA
ENSG00000160908.15;AL:chr7:99493242:99494631-99499638:99498484:99498842-99499638:-	-0.139006	SF3B1_HOT	ZNF394	NO	NA	NA
ENSG00000171163.16;A3:chr1:248858065-248858131:248858017-248858131:-	0.113094	SF3B1_HOT	ZNF692	NO	NA	NA
ENSG00000137941.17;SE:chr1:83883136-83885076:83885094-83887177:-	-0.397416	SF3B1_HOT	TTLL7	NO	NA	NA
ENSG00000162604.12;A5:chr1:61723772-61724902:61723772-61724920:-	-0.19369	SF3B1_HOT	TM2D1	NO	NA	NA
ENSG00000167608.11;A5:chr19:54163159-54163653:54163159-54163724:-	0.391017	SF3B1_HOT	TMC4	NO	NA	NA
ENSG00000225470.8;AL:chrX:73998844-73998954:73999669:73998844-74004270:74004551:+	-0.531035	SF3B1_HOT	JPX	NO	NA	NA
ENSG00000166508.18;AF:chr7:100100093-100100213:100100757:100100093-100101264:100101940:-	0.540563	SF3B1_HOT	MCM7	NO	NA	NA
ENSG00000175106.16;AF:chr17:15555364-15562193:15563428:15555364-15563437:15563544:-	0.239211	SF3B1_HOT	TVP23C	NO	NA	NA
ENSG00000149257.16;AF:chr11:75562137:75562319-75566316:75562370:75563770-75566316:+	0.215606	SF3B1_HOT	SERPINH1	NO	NA	NA
ENSG00000115970.18;RI:chr2:43291696:43291768-43292104:43292222:-	-0.11162	SF3B1_HOT	THADA	NO	NA	NA
ENSG00000166946.14;A5:chr15:43186233-43189199:43185879-43189199:+	-0.118292	SF3B1_HOT	CCNDBP1	NO	NA	NA
ENSG00000175224.16;SE:chr11:46617890-46618325:46618375-46644279:+	0.296256	SF3B1_HOT	ATG13	NO	NA	NA
ENSG00000121073.15;AF:chr17:49707068-49707343:49707771:49707068-49708076:49708157:-	-0.140783	SF3B1_HOT	SLC35B1	NO	NA	NA
ENSG00000245060.8;SE:chr5:180831806-180832673:180832860-180834312:+	-0.259642	SF3B1_HOT	LINC00847	NO	NA	NA
ENSG00000174775.17;RI:chr11:532242:532522-532631:532755:-	-0.113141	SF3B1_HOT	HRAS	NO	NA	NA
ENSG00000063601.17;SE:chrX:150699300-150712342:150712365-150718625:+	-0.127853	SF3B1_HOT	MTMR1	NO	NA	NA
ENSG00000099622.14;AF:chr19:1261156:1261453-1270928:1269352:1269410-1270928:+	-0.243203	SF3B1_HOT	CIRBP	NO	NA	NA
ENSG00000177728.17;SE:chr17:75496471-75496730:75496807-75497113:+	0.132374	SF3B1_HOT	TMEM94	NO	NA	NA
ENSG00000228315.12;AL:chr22:23652860:23652944-23659865:23653169:23653352-23659865:-	-0.160441	SF3B1_HOT	GUSBP11	NO	NA	NA
ENSG00000214331.8;A3:chr16:74338660-74338739:74338578-74338739:-	-0.145969	SF3B1_HOT	AC009053.1	NO	NA	NA
ENSG00000149054.16;AL:chr11:6955782-6956172:6956533:6955782-6984129:6984632:+	0.484569	SF3B1_HOT	ZNF215	NO	NA	NA
ENSG00000141552.17;A5:chr17:81891863-81893552:81891833-81893552:+	-0.106174	SF3B1_HOT	ANAPC11	NO	NA	NA
ENSG00000117139.18;AF:chr1:202777094-202807963:202808049:202777094-202808102:202808487:-	-0.529836	SF3B1_HOT	KDM5B	NO	NA	NA
ENSG00000077152.11;SE:chr1:202333555-202334989:202335058-202335642:-	-0.41484	SF3B1_HOT	UBE2T	NO	NA	NA
ENSG00000129292.21;RI:chr8:132814637:132814889-132817339:132817545:+	-0.2857	SF3B1_HOT	PHF20L1	NO	NA	NA
ENSG00000170638.9;AF:chr22:50185918:50186001-50193027:50190598:50190648-50193027:+	-0.158835	SF3B1_HOT	TRABD	NO	NA	NA
ENSG00000181991.16;SE:chr15:88468024-88472627:88472725-88475110:+	-0.14352	SF3B1_HOT	MRPS11	NO	NA	NA
ENSG00000029639.11;AL:chr6:155257653:155257908-155260273:155257977:155258082-155260273:-	0.30089	SF3B1_HOT	TFB1M	NO	NA	NA
ENSG00000121864.10;AF:chr3:179323076:179323291-179325042:179323763:179323844-179325042:+	0.222503	SF3B1_HOT	ZNF639	NO	NA	NA
ENSG00000114745.13;RI:chr3:39100305:39100454-39100747:39100877:-	0.238132	SF3B1_HOT	GORASP1	NO	NA	NA
ENSG00000153310.19;MX:chr8:129904585-129912470:129912515-129970943:129904585-129948966:129949067-129970943:-	0.116114	SF3B1_HOT	CYRIB	NO	NA	NA
ENSG00000048740.18;AF:chr10:11005321:11005440-11165486:11165140:11165317-11165486:+	-0.530443	SF3B1_HOT	CELF2	NO	NA	NA
ENSG00000204842.18;SE:chr12:111470742-111482787:111482831-111485271:-	-0.123059	SF3B1_HOT	ATXN2	NO	NA	NA
ENSG00000168488.18;AF:chr16:28823095:28823558-28825366:28824138:28824542-28825366:+	-0.211211	SF3B1_HOT	ATXN2L	NO	NA	NA
ENSG00000132522.16;AL:chr17:7311324:7311590-7313029:7312696:7312839-7313029:-	-0.325651	SF3B1_HOT	GPS2	NO	NA	NA
ENSG00000184925.12;A3:chr9:136953028-136953488:136953028-136953700:+	-0.28339	SF3B1_HOT	LCN12	NO	NA	NA
ENSG00000160953.16;A5:chr19:1374371-1376519:1374049-1376519:+	-0.512339	SF3B1_HOT	PWWP3A	NO	NA	NA
ENSG00000082153.18;AF:chr2:200811546:200811727-200813208:200811910:200811990-200813208:+	0.145768	SF3B1_HOT	BZW1	NO	NA	NA
ENSG00000075415.13;A5:chr12:98595661-98597856:98595557-98597856:+	-0.472371	SF3B1_HOT	SLC25A3	NO	NA	NA
ENSG00000225138.8;RI:chr5:479782:479997-480068:480216:+	0.129265	SF3B1_HOT	SLC9A3-AS1	NO	NA	NA
ENSG00000172775.17;AF:chr16:57173869-57175539:57175690:57173869-57185825:57186040:-	-0.213441	SF3B1_HOT	PSME3IP1	NO	NA	NA
ENSG00000154237.13;A5:chr15:101022597-101024803:101022478-101024803:+	-0.154835	SF3B1_HOT	LRRK1	NO	NA	NA
ENSG00000006652.15;AF:chr7:112451020:112451138-112455763:112452058:112452511-112455763:+	0.177214	SF3B1_HOT	IFRD1	NO	NA	NA
ENSG00000139620.13;SE:chr12:48671962-48679036:48679150-48679655:-	0.177803	SF3B1_HOT	KANSL2	NO	NA	NA
ENSG00000196295.12;SE:chr7:30579314-30584711:30584808-30585330:-	-0.105177	SF3B1_HOT	GARS1-DT	NO	NA	NA
ENSG00000174456.15;AL:chr12:110027028:110028589-110048363:110041895:110042459-110048363:-	-0.140989	SF3B1_HOT	C12orf76	NO	NA	NA
ENSG00000176715.17;AL:chr16:89146049-89151028:89151348:89146049-89154090:89154540:+	-0.383861	SF3B1_HOT	ACSF3	NO	NA	NA
ENSG00000127483.19;A5:chr1:20780540-20786186:20780540-20786253:-	-0.143793	SF3B1_HOT	HP1BP3	NO	NA	NA
ENSG00000214078.12;A5:chr20:35632923-35664802:35632923-35664879:-	0.370442	SF3B1_HOT	CPNE1	NO	NA	NA
ENSG00000104325.7;SE:chr8:90001561-90017302:90017326-90018909:+	-0.546457	SF3B1_HOT	DECR1	NO	NA	NA
ENSG00000196547.15;AF:chr15:90902926:90902975-90904190:90903302:90903432-90904190:+	-0.406629	SF3B1_HOT	MAN2A2	NO	NA	NA
ENSG00000066136.20;AF:chr1:40691716:40691867-40738836:40692290:40692347-40738836:+	0.23521	SF3B1_HOT	NFYC	NO	NA	NA
ENSG00000068120.15;A3:chr17:42562219-42562356:42562219-42562612:+	-0.200331	SF3B1_HOT	COASY	NO	NA	NA
ENSG00000186591.13;AF:chr7:129880971-129951278:129951327:129880971-129952503:129952943:-	-0.505672	SF3B1_HOT	UBE2H	NO	NA	NA
ENSG00000132507.18;AF:chr17:7307326:7307409-7309615:7307974:7308113-7309615:+	-0.12368	SF3B1_HOT	EIF5A	NO	NA	NA
ENSG00000178950.17;AF:chr4:913668-915498:915678:913668-932043:932220:-	-0.156437	SF3B1_HOT	GAK	NO	NA	NA
ENSG00000116212.15;MX:chr1:53946549-53947788:53947821-53951986:53946549-53947862:53947981-53951986:+	-0.123434	SF3B1_HOT	LRRC42	NO	NA	NA
ENSG00000214160.10;AF:chr3:184245812-184248782:184248949:184245812-184248990:184249520:-	-0.74202	SF3B1_HOT	ALG3	NO	NA	NA
ENSG00000179818.14;SE:chr2:70053792-70059643:70059680-70083538:-	0.186543	SF3B1_HOT	PCBP1-AS1	NO	NA	NA
ENSG00000167074.15;AF:chr22:41367333:41367599-41387351:41381942:41382201-41387351:+	-0.110292	SF3B1_HOT	TEF	NO	NA	NA
ENSG00000117682.17;A5:chr1:26432723-26432891:26432415-26432891:+	-0.156679	SF3B1_HOT	DHDDS	NO	NA	NA
ENSG00000245060.8;A5:chr5:180831941-180834312:180831806-180834312:+	-0.306487	SF3B1_HOT	LINC00847	NO	NA	NA
ENSG00000088986.11;A3:chr12:120496216-120496402:120496216-120496416:+	-0.284057	SF3B1_HOT	DYNLL1	NO	NA	NA
ENSG00000250903.9;AL:chr6:2399037-2412780:2412830:2399037-2480834:2483139:+	-0.291866	SF3B1_HOT	GMDS-DT	NO	NA	NA
ENSG00000135164.19;AF:chr7:87152468:87152555-87163495:87162798:87163332-87163495:+	-0.336015	SF3B1_HOT	DMTF1	NO	NA	NA
ENSG00000125388.20;SE:chr4:3029409-3035386:3035523-3037374:+	0.2529	SF3B1_HOT	GRK4	NO	NA	NA
ENSG00000180953.11;AF:chr15:79907684-79914588:79915256:79907684-79923452:79923702:-	-0.181436	SF3B1_HOT	ST20	NO	NA	NA
ENSG00000179335.18;AL:chr15:74629032-74629707:74630116:74629032-74635098:74645414:+	-0.22443	SF3B1_HOT	CLK3	NO	NA	NA
ENSG00000107372.13;SE:chr9:72360787-72363470:72363606-72364462:-	0.151462	SF3B1_HOT	ZFAND5	NO	NA	NA
ENSG00000134419.15;SE:chr16:18784823-18788063:18788159-18788981:-	-0.235944	SF3B1_HOT	RPS15A	NO	NA	NA
ENSG00000058272.19;MX:chr12:79798584-79805592:79805768-79807226:79798584-79806166:79806333-79807226:-	0.472626	SF3B1_HOT	PPP1R12A	NO	NA	NA
ENSG00000057935.14;A3:chr2:42697834-42704194:42697834-42704197:+	-0.138727	SF3B1_HOT	MTA3	NO	NA	NA
ENSG00000151092.18;A3:chr3:25737455-25739577:25736400-25739577:-	0.173747	SF3B1_HOT	NGLY1	NO	NA	NA
ENSG00000197530.12;A3:chr1:1628722-1629034:1628722-1629133:+	-0.137277	SF3B1_HOT	MIB2	NO	NA	NA
ENSG00000112425.16;SE:chr6:145635486-145671239:145671399-145686122:-	-0.166003	SF3B1_HOT	EPM2A	NO	NA	NA
ENSG00000243970.3;SE:chr1:39522505-39523562:39523697-39529055:-	0.215119	SF3B1_HOT	PPIEL	NO	NA	NA
ENSG00000141452.10;RI:chr18:23530229:23530297-23530511:23530612:+	-0.14566	SF3B1_HOT	RMC1	NO	NA	NA
ENSG00000111642.16;A5:chr12:6578917-6580278:6578917-6580582:-	-0.566634	SF3B1_HOT	CHD4	NO	NA	NA
ENSG00000149428.19;AF:chr11:119056167-119056805:119056910:119056167-119057020:119057139:-	0.169186	SF3B1_HOT	HYOU1	NO	NA	NA
ENSG00000118596.12;SE:chr12:59705018-59735930:59735988-59761125:+	-0.364862	SF3B1_HOT	SLC16A7	NO	NA	NA
ENSG00000213523.10;A3:chr5:140552184-140557147:140551169-140557147:-	-0.141804	SF3B1_HOT	SRA1	NO	NA	NA
ENSG00000138375.13;AF:chr2:216412484:216412648-216413856:216412743:216412798-216413856:+	-0.430508	SF3B1_HOT	SMARCAL1	NO	NA	NA
ENSG00000162236.12;A3:chr11:62831262-62831954:62831110-62831954:-	0.146663	SF3B1_HOT	STX5	NO	NA	NA
ENSG00000172354.10;AF:chr7:100673878:100673923-100677498:100677370:100677415-100677498:+	-0.488327	SF3B1_HOT	GNB2	NO	NA	NA
ENSG00000184203.8;MX:chr3:195519185-195523692:195523786-195529794:195519185-195524819:195524896-195529794:-	0.129997	SF3B1_HOT	PPP1R2	NO	NA	NA
ENSG00000106415.13;SE:chr7:8071131-8084897:8085017-8086193:+	0.10342	SF3B1_HOT	GLCCI1	NO	NA	NA
ENSG00000184203.8;SE:chr3:195523786-195524819:195524896-195529794:-	-0.132767	SF3B1_HOT	PPP1R2	NO	NA	NA
ENSG00000225648.5;A5:chr7:72829976-72830692:72829783-72830692:+	-0.104986	SF3B1_HOT	SBDSP1	NO	NA	NA
ENSG00000126070.20;SE:chr1:36004475-36005719:36005858-36008690:+	0.128876	SF3B1_HOT	AGO3	NO	NA	NA
ENSG00000118600.12;SE:chr12:63781174-63782541:63782704-63784970:+	0.102476	SF3B1_HOT	RXYLT1	NO	NA	NA
ENSG00000241769.7;A3:chrX:149536255-149538115:149536213-149538115:-	-0.189602	SF3B1_HOT	LINC00893	NO	NA	NA
ENSG00000163913.12;RI:chr3:129514389:129514554-129515488:129515599:+	-0.175003	SF3B1_HOT	IFT122	NO	NA	NA
ENSG00000120992.18;AF:chr8:54100939-54101350:54101554:54100939-54101755:54101854:-	0.359873	SF3B1_HOT	LYPLA1	NO	NA	NA
ENSG00000147586.10;AL:chr8:79918855:79919148-80002999:79957803:79958435-80002999:-	0.226651	SF3B1_HOT	MRPS28	NO	NA	NA
ENSG00000119720.18;SE:chr14:90316811-90317704:90317820-90318005:-	0.195608	SF3B1_HOT	NRDE2	NO	NA	NA
ENSG00000126746.17;AF:chr12:6688226-6688703:6688859:6688226-6689368:6689572:-	0.24876	SF3B1_HOT	ZNF384	NO	NA	NA
ENSG00000144120.13;A5:chr2:119679617-119680832:119679276-119680832:+	-0.299948	SF3B1_HOT	TMEM177	NO	NA	NA
ENSG00000011304.21;SE:chr19:805187-805492:805569-806408:+	0.143356	SF3B1_HOT	PTBP1	NO	NA	NA
ENSG00000153250.20;AF:chr2:160367391-160407464:160407889:160367391-160493289:160493482:-	-0.396271	SF3B1_HOT	RBMS1	NO	NA	NA
ENSG00000230606.11;AF:chr2:97423918-97424295:97425278:97423918-97429217:97429871:-	-0.529146	SF3B1_HOT	AC092683.1	NO	NA	NA
ENSG00000164828.18;AF:chr7:816615:816673-838798:832955:833229-838798:+	0.358384	SF3B1_HOT	SUN1	NO	NA	NA
ENSG00000162244.12;AF:chr3:51995469-51995779:51995815:51995469-51995857:51995881:-	0.611701	SF3B1_HOT	RPL29	NO	NA	NA
ENSG00000139546.11;AF:chr12:53500921:53501461-53502015:53501605:53501708-53502015:+	-0.234406	SF3B1_HOT	TARBP2	NO	NA	NA
ENSG00000015479.20;AF:chr5:139293716:139293805-139314675:139308243:139308327-139314675:+	-0.312478	SF3B1_HOT	MATR3	NO	NA	NA
ENSG00000103335.22;AL:chr16:88717023:88717211-88719574:88717715:88717808-88719574:-	0.421579	SF3B1_HOT	PIEZO1	NO	NA	NA
ENSG00000167186.11;A5:chr16:19068878-19071928:19068230-19071928:+	-0.160083	SF3B1_HOT	COQ7	NO	NA	NA
ENSG00000135912.11;A5:chr2:218747738-218748105:218747725-218748105:+	-0.108203	SF3B1_HOT	TTLL4	NO	NA	NA
ENSG00000088387.19;SE:chr13:98846060-98846520:98846556-98848592:-	0.201439	SF3B1_HOT	DOCK9	NO	NA	NA
ENSG00000121073.15;AF:chr17:49705896-49706204:49706355:49705896-49706965:49707067:-	0.118532	SF3B1_HOT	SLC35B1	NO	NA	NA
ENSG00000160953.16;AF:chr19:1354972:1355020-1357009:1356364:1356449-1357009:+	-0.385769	SF3B1_HOT	PWWP3A	NO	NA	NA
ENSG00000066044.15;AF:chr19:7991831-8002052:8002203:7991831-8005495:8005641:-	-0.454393	SF3B1_HOT	ELAVL1	NO	NA	NA
ENSG00000248309.7;MX:chr5:88889480-88892167:88892277-88905209:88889480-88903938:88904203-88905209:+	-0.447777	SF3B1_HOT	MEF2C-AS1	NO	NA	NA
ENSG00000130724.9;AF:chr19:58554236-58554865:58554973:58554236-58554988:58555105:-	0.11394	SF3B1_HOT	CHMP2A	NO	NA	NA
ENSG00000091527.16;AL:chr3:133586722-133587896:133588052:133586722-133588353:133589162:+	0.10044	SF3B1_HOT	CDV3	NO	NA	NA
ENSG00000144559.10;SE:chr3:11844211-11844891:11845096-11846502:-	-0.138154	SF3B1_HOT	TAMM41	NO	NA	NA
ENSG00000182196.13;AF:chr12:122980231:122980385-122981129:122980716:122980812-122981129:+	0.160424	SF3B1_HOT	ARL6IP4	NO	NA	NA
ENSG00000111481.10;MX:chr12:54342287-54343225:54343316-54347767:54342287-54345460:54345515-54347767:+	0.194719	SF3B1_HOT	COPZ1	NO	NA	NA
ENSG00000126457.21;AF:chr19:49675786:49676439-49680487:49677277:49677316-49680487:+	-0.202269	SF3B1_HOT	PRMT1	NO	NA	NA
ENSG00000139624.14;AF:chr12:50144057-50144203:50144499:50144057-50167101:50167320:-	-0.223654	SF3B1_HOT	CERS5	NO	NA	NA
ENSG00000136856.18;AL:chr9:127404991-127405420:127405469:127404991-127407112:127407898:+	-0.247765	SF3B1_HOT	SLC2A8	NO	NA	NA
ENSG00000169093.16;AF:chrX:1442317-1452748:1452929:1442317-1453618:1453762:-	0.336702	SF3B1_HOT	ASMTL	NO	NA	NA
ENSG00000119953.14;A3:chr10:110298810-110300547:110298790-110300547:-	-0.139808	SF3B1_HOT	SMNDC1	NO	NA	NA
ENSG00000184209.15;AL:chr12:123458216-123464429:123464899:123458216-123465538:123466936:+	-0.183496	SF3B1_HOT	SNRNP35	NO	NA	NA
ENSG00000170476.16;SE:chr5:139388131-139388461:139388667-139389680:-	-0.231641	SF3B1_HOT	MZB1	NO	NA	NA
ENSG00000244687.12;AF:chr20:50096820-50113107:50113125:50096820-50115485:50115957:-	-0.362739	SF3B1_HOT	UBE2V1	NO	NA	NA
ENSG00000106077.18;RI:chr7:73737221:73737391-73737562:73737735:-	-0.163962	SF3B1_HOT	ABHD11	NO	NA	NA
ENSG00000137171.15;A5:chr6:43060605-43061311:43060238-43061311:+	0.356045	SF3B1_HOT	KLC4	NO	NA	NA
ENSG00000101194.18;AF:chr20:62952709:62952889-62956765:62953046:62953272-62956765:+	-0.194878	SF3B1_HOT	SLC17A9	NO	NA	NA
ENSG00000130717.13;A3:chr9:131530687-131531094:131530645-131531094:-	-0.477973	SF3B1_HOT	UCK1	NO	NA	NA
ENSG00000133773.12;AF:chr12:82357269-82358223:82358387:82357269-82358679:82358805:-	0.323633	SF3B1_HOT	CCDC59	NO	NA	NA
ENSG00000135722.9;AF:chr16:67159961:67160056-67161735:67161120:67161241-67161735:+	0.432787	SF3B1_HOT	FBXL8	NO	NA	NA
ENSG00000174456.15;AL:chr12:110041895:110042459-110048363:110044117:110044533-110048363:-	0.129993	SF3B1_HOT	C12orf76	NO	NA	NA
ENSG00000166347.19;AF:chr18:74263477-74290888:74291041:74263477-74291747:74291973:-	-0.347425	SF3B1_HOT	CYB5A	NO	NA	NA
ENSG00000136874.11;AL:chr9:99951285-99953994:99954043:99951285-99959917:99959953:+	-0.503374	SF3B1_HOT	STX17	NO	NA	NA
ENSG00000129187.14;AF:chr4:182915575-182916286:182916627:182915575-182917311:182917594:-	-0.125873	SF3B1_HOT	DCTD	NO	NA	NA
ENSG00000153048.11;AF:chr16:8859335-8867707:8867887:8859335-8868966:8869006:-	-0.117772	SF3B1_HOT	CARHSP1	NO	NA	NA
ENSG00000125734.15;A3:chr19:6731111-6731199:6731054-6731199:-	0.153726	SF3B1_HOT	GPR108	NO	NA	NA
ENSG00000132964.12;A3:chr13:26401347-26401466:26401347-26401469:+	0.163231	SF3B1_HOT	CDK8	NO	NA	NA
ENSG00000177683.14;AL:chr7:108564382:108565105-108569490:108565171:108566022-108569490:-	0.13073	SF3B1_HOT	THAP5	NO	NA	NA
ENSG00000131503.21;A3:chr5:140436257-140438461:140436257-140438494:+	0.410755	SF3B1_HOT	ANKHD1	NO	NA	NA
ENSG00000249673.7;AL:chr4:2938792-2940302:2940504:2938792-2946873:2947673:+	-0.39651	SF3B1_HOT	NOP14-AS1	NO	NA	NA
ENSG00000269609.6;AF:chr10:102450068:102450330-102455337:102450804:102452187-102455337:+	-0.384638	SF3B1_HOT	RPARP-AS1	NO	NA	NA
ENSG00000083168.11;SE:chr8:41955411-41957049:41957180-41974704:-	-0.186146	SF3B1_HOT	KAT6A	NO	NA	NA
ENSG00000172273.13;AF:chr11:119121592:119121639-119126935:119123733:119124236-119126935:+	0.129747	SF3B1_HOT	HINFP	NO	NA	NA
ENSG00000101187.16;AL:chr20:62669078-62671750:62672154:62669078-62685441:62685785:+	-0.342968	SF3B1_HOT	SLCO4A1	NO	NA	NA
ENSG00000071994.11;AL:chr6:170580093:170580105-170583057:170581745:170582265-170583057:-	-0.143259	SF3B1_HOT	PDCD2	NO	NA	NA
ENSG00000154743.18;A3:chr3:12532773-12538802:12532773-12539161:+	-0.139069	SF3B1_HOT	TSEN2	NO	NA	NA
ENSG00000127314.18;SE:chr12:68611043-68648699:68648781-68654112:+	0.48208	SF3B1_HOT	RAP1B	NO	NA	NA
ENSG00000104635.14;AF:chr8:22367249:22367408-22404696:22367537:22367737-22404696:+	-0.382855	SF3B1_HOT	SLC39A14	NO	NA	NA
ENSG00000267002.4;A3:chr17:43167849-43170126:43167262-43170126:-	0.171845	SF3B1_HOT	AC060780.1	NO	NA	NA
ENSG00000169398.19;A5:chr8:140674404-140675430:140674404-140675460:-	-0.477187	SF3B1_HOT	PTK2	NO	NA	NA
ENSG00000143499.14;RI:chr1:214330950:214331070-214332018:214334308:+	-0.117506	SF3B1_HOT	SMYD2	NO	NA	NA
ENSG00000166169.17;A5:chr10:101587406-101587822:101587406-101588204:-	0.233635	SF3B1_HOT	POLL	NO	NA	NA
ENSG00000156976.17;SE:chr3:186787264-186787479:186787584-186787803:+	-0.302272	SF3B1_HOT	EIF4A2	NO	NA	NA
ENSG00000135535.17;SE:chr6:109368325-109368922:109369017-109370411:-	-0.345713	SF3B1_HOT	CD164	NO	NA	NA
ENSG00000168421.13;AF:chr4:40193649:40193812-40242714:40196907:40197300-40242714:+	-0.252671	SF3B1_HOT	RHOH	NO	NA	NA
ENSG00000163378.14;RI:chr3:68988506:68988577-68988925:68989017:-	-0.163114	SF3B1_HOT	EOGT	NO	NA	NA
ENSG00000149792.9;A5:chr11:65122464-65125488:65122424-65125488:+	-0.207251	SF3B1_HOT	MRPL49	NO	NA	NA
ENSG00000104979.9;SE:chr19:13774574-13774652:13774707-13778052:+	0.108593	SF3B1_HOT	C19orf53	NO	NA	NA
ENSG00000120899.18;SE:chr8:27444271-27445794:27445919-27450749:+	0.252172	SF3B1_HOT	PTK2B	NO	NA	NA
ENSG00000170445.16;RI:chr5:140677655:140677753-140677908:140679127:-	-0.12841	SF3B1_HOT	HARS1	NO	NA	NA
ENSG00000040531.16;AF:chr17:3636459:3636708-3637107:3636726:3636831-3637107:+	0.164147	SF3B1_HOT	CTNS	NO	NA	NA
ENSG00000198563.14;A3:chr6:31540664-31541950:31540534-31541950:-	0.240923	SF3B1_HOT	DDX39B	NO	NA	NA
ENSG00000123415.15;A5:chr12:54187905-54188511:54187905-54188515:-	0.264685	SF3B1_HOT	SMUG1	NO	NA	NA
ENSG00000139620.13;MX:chr12:48655060-48660366:48660619-48667693:48655060-48662560:48662654-48667693:-	0.107605	SF3B1_HOT	KANSL2	NO	NA	NA
ENSG00000225484.7;AF:chr10:79814716-79825288:79825381:79814716-79826198:79826282:-	-0.332997	SF3B1_HOT	NUTM2B-AS1	NO	NA	NA
ENSG00000167595.15;A3:chr19:35766955-35767072:35766955-35767804:+	0.365375	SF3B1_HOT	PROSER3	NO	NA	NA
ENSG00000080503.24;AF:chr9:2158476:2158553-2161686:2160613:2161035-2161686:+	0.537991	SF3B1_HOT	SMARCA2	NO	NA	NA
ENSG00000163534.15;A3:chr1:157801591-157801915:157801577-157801915:-	-0.262223	SF3B1_HOT	FCRL1	NO	NA	NA
ENSG00000167460.17;AL:chr19:16093753-16095264:16095496:16093753-16101264:16102952:+	-0.229709	SF3B1_HOT	TPM4	NO	NA	NA
ENSG00000204576.12;SE:chr6:30557450-30558150:30558212-30561834:+	0.13513	SF3B1_HOT	PRR3	NO	NA	NA
ENSG00000110031.13;AF:chr11:58570713-58575760:58575883:58570713-58577986:58578220:-	-0.254457	SF3B1_HOT	LPXN	NO	NA	NA
ENSG00000170476.16;A3:chr5:139389420-139389680:139388601-139389680:-	0.543338	SF3B1_HOT	MZB1	NO	NA	NA
ENSG00000182979.18;SE:chr14:105466742-105468338:105468349-105469467:+	-0.140217	SF3B1_HOT	MTA1	NO	NA	NA
ENSG00000065029.15;AF:chr6:35259604:35259727-35281056:35259735:35259841-35281056:+	-0.115506	SF3B1_HOT	ZNF76	NO	NA	NA
ENSG00000179029.15;A3:chr17:8175875-8175959:8175857-8175959:-	0.316952	SF3B1_HOT	TMEM107	NO	NA	NA
ENSG00000213347.10;AL:chr5:177305500:177307195-177307781:177307205:177307703-177307781:-	-0.282577	SF3B1_HOT	MXD3	NO	NA	NA
ENSG00000177595.18;AF:chr11:804463-805179:805230:804463-809412:809523:-	-0.291185	SF3B1_HOT	PIDD1	NO	NA	NA
ENSG00000130726.12;A3:chr19:58548776-58548862:58548776-58548886:+	0.116484	SF3B1_HOT	TRIM28	NO	NA	NA
ENSG00000204351.12;A3:chr6:31968538-31968623:31968538-31968686:+	-0.155673	SF3B1_HOT	SKIV2L	NO	NA	NA
ENSG00000108433.17;AL:chr17:46932199-46935029:46937696:46932199-46938599:46942019:+	-0.232104	SF3B1_HOT	GOSR2	NO	NA	NA
ENSG00000223960.7;AL:chr2:178430889-178431047:178433024:178430889-178433382:178434057:+	-0.190939	SF3B1_HOT	CHROMR	NO	NA	NA
ENSG00000001084.13;A3:chr6:53516240-53520778:53516222-53520778:-	-0.23773	SF3B1_HOT	GCLC	NO	NA	NA
ENSG00000068137.15;A5:chr17:42670705-42670994:42670705-42671003:-	-0.14182	SF3B1_HOT	PLEKHH3	NO	NA	NA
ENSG00000166347.19;SE:chr18:74255775-74260915:74260944-74263349:-	-0.283652	SF3B1_HOT	CYB5A	NO	NA	NA
ENSG00000175224.16;SE:chr11:46617890-46618260:46618375-46644279:+	0.242673	SF3B1_HOT	ATG13	NO	NA	NA
ENSG00000113048.17;AL:chr5:72238025:72238128-72295531:72294554:72294788-72295531:-	-0.51778	SF3B1_HOT	MRPS27	NO	NA	NA
ENSG00000109113.20;A3:chr17:28717425-28718122:28717291-28718122:-	-0.376307	SF3B1_HOT	RAB34	NO	NA	NA
ENSG00000101246.20;SE:chr20:63706738-63706999:63707092-63707867:-	-0.390109	SF3B1_HOT	ARFRP1	NO	NA	NA
ENSG00000141522.12;AL:chr17:81867897:81868943-81869173:81869004:81869075-81869173:-	0.468007	SF3B1_HOT	ARHGDIA	NO	NA	NA
ENSG00000254986.7;RI:chr11:66495206:66495268-66495365:66495489:+	-0.128498	SF3B1_HOT	DPP3	NO	NA	NA
ENSG00000125812.16;SE:chr20:23368929-23369584:23369741-23370091:+	0.125043	SF3B1_HOT	GZF1	NO	NA	NA
ENSG00000127419.17;A3:chr4:932540-950421:932540-950424:+	-0.111757	SF3B1_HOT	TMEM175	NO	NA	NA
ENSG00000133460.19;AF:chr22:23857471:23857531-23862104:23857875:23858029-23862104:+	-0.329214	SF3B1_HOT	SLC2A11	NO	NA	NA
ENSG00000245937.8;AF:chr5:128061244-128081973:128082176:128061244-128082735:128083100:-	-0.28562	SF3B1_HOT	LINC01184	NO	NA	NA
ENSG00000135452.10;RI:chr12:57746176:57746256-57746589:57746720:+	-0.104602	SF3B1_HOT	TSPAN31	NO	NA	NA
ENSG00000164828.18;AF:chr7:832476:832601-838798:832955:833229-838798:+	0.328147	SF3B1_HOT	SUN1	NO	NA	NA
ENSG00000152942.19;A5:chr5:69370284-69371035:69369933-69371035:+	-0.102854	SF3B1_HOT	RAD17	NO	NA	NA
ENSG00000122224.18;SE:chr1:160823796-160824181:160824249-160827748:+	0.107789	SF3B1_HOT	LY9	NO	NA	NA
ENSG00000168014.16;A3:chr11:74129972-74132844:74129842-74132844:-	-0.111507	SF3B1_HOT	C2CD3	NO	NA	NA
ENSG00000013375.16;AL:chr6:83168903:83169323-83170305:83169521:83169841-83170305:-	0.396891	SF3B1_HOT	PGM3	NO	NA	NA
ENSG00000065357.20;RI:chr12:55939415:55940170-55940314:55940433:+	0.272698	SF3B1_HOT	DGKA	NO	NA	NA
ENSG00000115652.15;A3:chr2:106164799-106166056:106164784-106166056:-	-0.245828	SF3B1_HOT	UXS1	NO	NA	NA
ENSG00000214022.11;SE:chr7:150369868-150370760:150370884-150371228:+	0.141571	SF3B1_HOT	REPIN1	NO	NA	NA
ENSG00000170476.16;A3:chr5:139389420-139389680:139388667-139389680:-	0.554299	SF3B1_HOT	MZB1	NO	NA	NA
ENSG00000174227.16;SE:chr4:516185-521056:521227-521660:+	0.187834	SF3B1_HOT	PIGG	NO	NA	NA
ENSG00000115415.20;AL:chr2:190908460:190909000-190974830:190970291:190970717-190974830:-	-0.276254	SF3B1_HOT	STAT1	NO	NA	NA
ENSG00000087470.18;SE:chr12:32737161-32738264:32738296-32740064:+	-0.150799	SF3B1_HOT	DNM1L	NO	NA	NA
ENSG00000175197.12;A3:chr12:57517595-57517706:57517424-57517706:-	-0.34038	SF3B1_HOT	DDIT3	NO	NA	NA
ENSG00000168010.11;AF:chr11:72814411:72814563-72816728:72815887:72816349-72816728:+	-0.546308	SF3B1_HOT	ATG16L2	NO	NA	NA
ENSG00000150433.9;A3:chr11:125102351-125102734:125102317-125102734:-	-0.190782	SF3B1_HOT	TMEM218	NO	NA	NA
ENSG00000198563.14;RI:chr6:31532780:31532911-31535367:31535485:-	-0.206192	SF3B1_HOT	DDX39B	NO	NA	NA
ENSG00000198728.11;AF:chr10:102111536-102114406:102114946:102111536-102120086:102120285:-	0.131084	SF3B1_HOT	LDB1	NO	NA	NA
ENSG00000100225.18;A3:chr22:32475124-32478981:32475124-32479133:+	0.105088	SF3B1_HOT	FBXO7	NO	NA	NA
ENSG00000164924.18;AF:chr8:100948900-100951456:100951595:100948900-100951929:100952619:-	-0.649707	SF3B1_HOT	YWHAZ	NO	NA	NA
ENSG00000125991.20;AF:chr20:35554916:35555075-35556207:35556095:35556129-35556207:+	0.664505	SF3B1_HOT	ERGIC3	NO	NA	NA
ENSG00000126005.17;A5:chr20:35277932-35278009:35277932-35278046:-	-0.116213	SF3B1_HOT	MMP24OS	NO	NA	NA
ENSG00000217930.8;AF:chr16:4343291-4343483:4343761:4343291-4351232:4351270:-	-0.20461	SF3B1_HOT	PAM16	NO	NA	NA
ENSG00000173681.16;A5:chrX:19935898-19937418:19935898-19937505:-	0.212623	SF3B1_HOT	BCLAF3	NO	NA	NA
ENSG00000108946.15;AF:chr17:68512430:68512548-68515394:68512882:68512978-68515394:+	-0.304153	SF3B1_HOT	PRKAR1A	NO	NA	NA
ENSG00000011260.14;AF:chr17:51275868:51275991-51280005:51277163:51277304-51280005:+	-0.45351	SF3B1_HOT	UTP18	NO	NA	NA
ENSG00000168421.13;AF:chr4:40193649:40193812-40242714:40200344:40200565-40242714:+	-0.423405	SF3B1_HOT	RHOH	NO	NA	NA
ENSG00000142687.18;MX:chr1:35466695-35470863:35470960-35478966:35466695-35474805:35474906-35478966:-	0.489452	SF3B1_HOT	KIAA0319L	NO	NA	NA
ENSG00000117335.20;A5:chr1:207770362-207783292:207767823-207783292:+	-0.18977	SF3B1_HOT	CD46	NO	NA	NA
ENSG00000153714.6;AL:chr9:12776027-12777200:12777578:12776027-12821386:12823060:+	-0.286219	SF3B1_HOT	LURAP1L	NO	NA	NA
ENSG00000163479.14;AF:chr1:156020167-156020424:156020845:156020167-156020888:156020928:-	0.172301	SF3B1_HOT	SSR2	NO	NA	NA
ENSG00000205268.11;AF:chr8:65782843-65788882:65789084:65782843-65841371:65841508:-	-0.7365	SF3B1_HOT	PDE7A	NO	NA	NA
ENSG00000131165.16;AF:chr16:89653923-89654338:89654613:89653923-89657582:89657708:-	-0.596235	SF3B1_HOT	CHMP1A	NO	NA	NA
ENSG00000204351.12;RI:chr6:31969280:31969420-31969515:31969751:+	-0.136994	SF3B1_HOT	SKIV2L	NO	NA	NA
ENSG00000115677.17;AF:chr2:241268541-241272761:241272863:241268541-241315570:241315672:-	0.515354	SF3B1_HOT	HDLBP	NO	NA	NA
ENSG00000123415.15;A5:chr12:54188596-54188726:54188596-54188826:-	0.264685	SF3B1_HOT	SMUG1	NO	NA	NA
ENSG00000166347.19;AF:chr18:74263477-74290888:74291041:74263477-74291747:74291963:-	-0.617627	SF3B1_HOT	CYB5A	NO	NA	NA
ENSG00000239213.6;A5:chr3:136846586-136861615:136846586-136861747:-	0.121107	SF3B1_HOT	NCK1-DT	NO	NA	NA
ENSG00000085978.22;RI:chr2:233289854:233289974-233290248:233290353:+	-0.191468	SF3B1_HOT	ATG16L1	NO	NA	NA
ENSG00000135297.16;AF:chr6:73461578:73462071-73466209:73462143:73462322-73466209:+	0.143242	SF3B1_HOT	MTO1	NO	NA	NA
ENSG00000163681.16;AL:chr3:57923023-57925845:57926290:57923023-57927296:57929168:+	-0.176422	SF3B1_HOT	SLMAP	NO	NA	NA
ENSG00000224597.10;AL:chr10:29415412-29420491:29422372:29415412-29482833:29483918:+	-0.154231	SF3B1_HOT	SVIL-AS1	NO	NA	NA
ENSG00000065150.21;SE:chr13:97969830-97975891:97975997-97976693:+	0.274549	SF3B1_HOT	IPO5	NO	NA	NA
ENSG00000168970.22;RI:chr15:41845203:41845320-41845638:41845775:+	0.106927	SF3B1_HOT	JMJD7-PLA2G4B	NO	NA	NA
ENSG00000206503.13;RI:chr6:29944500:29944616-29945063:29945091:+	-0.371129	SF3B1_HOT	HLA-A	NO	NA	NA
ENSG00000151092.18;MX:chr3:25736149-25736309:25736400-25739577:25736149-25737334:25737455-25739577:-	-0.122555	SF3B1_HOT	NGLY1	NO	NA	NA
ENSG00000174177.13;RI:chr16:88714383:88714486-88714587:88714737:+	-0.169184	SF3B1_HOT	CTU2	NO	NA	NA
ENSG00000155463.14;RI:chr14:22770193:22770278-22770461:22770625:+	-0.314939	SF3B1_HOT	OXA1L	NO	NA	NA
ENSG00000262879.6;AL:chr17:46984045:46984069-47021582:47010070:47010736-47021582:-	-0.209523	SF3B1_HOT	AC005670.3	NO	NA	NA
ENSG00000065029.15;AF:chr6:35258909:35259386-35281056:35259604:35259727-35281056:+	0.305544	SF3B1_HOT	ZNF76	NO	NA	NA
ENSG00000143786.8;AF:chr1:224434660:224434862-224515741:224434912:224435187-224515741:+	-0.22715	SF3B1_HOT	CNIH3	NO	NA	NA
ENSG00000236104.3;AF:chr6:33316985-33317653:33317744:33316985-33317878:33317942:-	0.194618	SF3B1_HOT	ZBTB22	NO	NA	NA
ENSG00000184465.16;A3:chr6:169663878-169664166:169663706-169664166:-	-0.10923	SF3B1_HOT	WDR27	NO	NA	NA
ENSG00000198563.14;AF:chr6:31540534-31541634:31541729:31540534-31541950:31541989:-	0.345116	SF3B1_HOT	DDX39B	NO	NA	NA
ENSG00000198668.13;A5:chr14:90397233-90400065:90397154-90400065:+	-0.12363	SF3B1_HOT	CALM1	NO	NA	NA
ENSG00000171453.20;AL:chr6:43521048-43521182:43521513:43521048-43529249:43529585:+	0.172137	SF3B1_HOT	POLR1C	NO	NA	NA
ENSG00000072786.13;SE:chr5:172045022-172045426:172045480-172052929:-	-0.119743	SF3B1_HOT	STK10	NO	NA	NA
ENSG00000220804.8;SE:chr2:242114741-242116183:242116232-242118965:+	-0.266863	SF3B1_HOT	LINC01881	NO	NA	NA
ENSG00000177943.14;SE:chr9:136854676-136854762:136854850-136854937:+	-0.103648	SF3B1_HOT	MAMDC4	NO	NA	NA
ENSG00000153250.20;AF:chr2:160367391-160407464:160407889:160367391-160493289:160493807:-	-0.223647	SF3B1_HOT	RBMS1	NO	NA	NA
ENSG00000103121.9;MX:chr16:80981877-80988540:80988596-80997314:80981877-80996923:80997020-80997314:-	-0.320722	SF3B1_HOT	CMC2	NO	NA	NA
ENSG00000115415.20;AL:chr2:190908460:190909000-190974830:190944703:190945657-190974830:-	-0.308803	SF3B1_HOT	STAT1	NO	NA	NA
ENSG00000135018.14;A5:chr9:83665145-83666350:83665145-83669185:-	-0.314057	SF3B1_HOT	UBQLN1	NO	NA	NA
ENSG00000187535.14;RI:chr16:1525887:1526077-1526619:1526796:-	-0.107506	SF3B1_HOT	IFT140	NO	NA	NA
ENSG00000251022.6;MX:chr4:82895774-82897989:82898062-82900077:82895774-82899713:82899737-82900077:-	0.109689	SF3B1_HOT	THAP9-AS1	NO	NA	NA
ENSG00000189190.10;A3:chr19:52781464-52786595:52781055-52786595:-	-0.143319	SF3B1_HOT	ZNF600	NO	NA	NA
ENSG00000253686.2;MX:chr5:173710268-173711846:173711948-173746020:173710268-173718841:173719543-173746020:-	-0.292786	SF3B1_HOT	LINC01484	NO	NA	NA
ENSG00000153310.19;SE:chr8:129862334-129871375:129871496-129903312:-	0.11909	SF3B1_HOT	CYRIB	NO	NA	NA
ENSG00000184047.20;AF:chr12:122218397-122220530:122222556:122218397-122224512:122226022:-	-0.103036	SF3B1_HOT	DIABLO	NO	NA	NA
ENSG00000104529.17;SE:chr8:143590081-143592647:143592942-143597348:-	0.133634	SF3B1_HOT	EEF1D	NO	NA	NA
ENSG00000172936.16;RI:chr3:38140388:38140549-38140757:38140848:+	-0.1618	SF3B1_HOT	MYD88	NO	NA	NA
ENSG00000206149.10;RI:chr15:28655273:28655420-28655495:28655691:+	-0.205295	SF3B1_HOT	HERC2P9	NO	NA	NA
ENSG00000144645.14;AF:chr3:31879830-31960143:31960336:31879830-31980899:31981302:-	-0.174767	SF3B1_HOT	OSBPL10	NO	NA	NA
ENSG00000048740.18;AF:chr10:11005335:11005440-11165486:11165140:11165317-11165486:+	-0.324354	SF3B1_HOT	CELF2	NO	NA	NA
ENSG00000168255.20;RI:chr7:102566997:102567083-102568010:102568184:-	-0.285767	SF3B1_HOT	POLR2J3	NO	NA	NA
ENSG00000223960.7;AL:chr2:178430889-178431047:178433024:178430889-178433382:178435210:+	-0.182156	SF3B1_HOT	CHROMR	NO	NA	NA
ENSG00000144535.20;A3:chr2:232335874-232336141:232335874-232336214:+	-0.56447	SF3B1_HOT	DIS3L2	NO	NA	NA
ENSG00000131473.17;SE:chr17:41893174-41896620:41896649-41897749:-	-0.132676	SF3B1_HOT	ACLY	NO	NA	NA
ENSG00000121940.16;SE:chr1:108940142-108941405:108941494-108943475:-	0.180722	SF3B1_HOT	CLCC1	NO	NA	NA
ENSG00000146576.13;SE:chr7:6602140-6602664:6602752-6607537:+	0.116571	SF3B1_HOT	C7orf26	NO	NA	NA
ENSG00000166347.19;AF:chr18:74263477-74290888:74291041:74263477-74291747:74291957:-	-0.609317	SF3B1_HOT	CYB5A	NO	NA	NA
ENSG00000105819.14;AL:chr7:103312131-103312207:103312312:103312131-103328931:103329511:+	-0.60544	SF3B1_HOT	PMPCB	NO	NA	NA
ENSG00000206149.10;SE:chr15:28612173-28618219:28618378-28618524:+	-0.1677	SF3B1_HOT	HERC2P9	NO	NA	NA
ENSG00000064607.17;AL:chr19:18990888:18991149-18993638:18991268:18991742-18993638:-	0.251257	SF3B1_HOT	SUGP2	NO	NA	NA
ENSG00000171703.17;A3:chr20:64070635-64071858:64070635-64071870:+	-0.245027	SF3B1_HOT	TCEA2	NO	NA	NA
ENSG00000153029.14;SE:chr1:181034074-181036997:181037112-181049052:+	-0.249359	SF3B1_HOT	MR1	NO	NA	NA
ENSG00000063176.16;A5:chr19:48619689-48620402:48619543-48620402:+	0.256265	SF3B1_HOT	SPHK2	NO	NA	NA
ENSG00000230590.11;AF:chrX:74281848-74292326:74292351:74281848-74292427:74292516:-	0.1646	SF3B1_HOT	FTX	NO	NA	NA
ENSG00000126790.12;A5:chr14:59479351-59483490:59479351-59483680:-	0.107514	SF3B1_HOT	L3HYPDH	NO	NA	NA
ENSG00000128739.23;A3:chr15:24968082-24974288:24968082-24974387:+	0.334695	SF3B1_HOT	SNRPN	NO	NA	NA
ENSG00000189362.12;AF:chr2:190525378-190534012:190534349:190525378-190534559:190534722:-	0.152964	SF3B1_HOT	NEMP2	NO	NA	NA
ENSG00000099622.14;AF:chr19:1261156:1261453-1270928:1269268:1269410-1270928:+	-0.150508	SF3B1_HOT	CIRBP	NO	NA	NA
ENSG00000100911.16;A3:chr14:24146240-24146534:24145772-24146534:-	0.147539	SF3B1_HOT	PSME2	NO	NA	NA
ENSG00000036257.13;AF:chr2:224557856-224569689:224569825:224557856-224584944:224585363:-	-0.559377	SF3B1_HOT	CUL3	NO	NA	NA
ENSG00000011485.15;SE:chr19:46376574-46383411:46383476-46383780:+	-0.120165	SF3B1_HOT	PPP5C	NO	NA	NA
ENSG00000171703.17;AF:chr20:64049836:64050052-64062430:64057293:64057651-64062430:+	-0.373472	SF3B1_HOT	TCEA2	NO	NA	NA
ENSG00000091527.16;AF:chr3:133574434:133574551-133575039:133574638:133574742-133575039:+	0.162289	SF3B1_HOT	CDV3	NO	NA	NA
ENSG00000066136.20;AF:chr1:40691648:40691867-40738836:40692290:40692347-40738836:+	0.226486	SF3B1_HOT	NFYC	NO	NA	NA
ENSG00000204954.10;AL:chr12:103951282:103951630-103956631:103954652:103954968-103956631:-	-0.304122	SF3B1_HOT	C12orf73	NO	NA	NA
ENSG00000262879.6;AL:chr17:46984045:46984069-47021582:47016149:47018465-47021582:-	-0.353311	SF3B1_HOT	AC005670.3	NO	NA	NA
ENSG00000132603.15;RI:chr16:69340006:69340092-69340194:69340332:+	-0.138785	SF3B1_HOT	NIP7	NO	NA	NA
ENSG00000125991.20;A3:chr20:35556271-35556955:35556271-35556973:+	-0.108335	SF3B1_HOT	ERGIC3	NO	NA	NA
ENSG00000182196.13;AF:chr12:122980495:122980887-122981129:122980928:122980987-122981129:+	-0.267632	SF3B1_HOT	ARL6IP4	NO	NA	NA
ENSG00000140563.15;MX:chr15:94231664-94278154:94278263-94298201:94231664-94292851:94292964-94298201:+	-0.159178	SF3B1_HOT	MCTP2	NO	NA	NA
ENSG00000006744.19;A5:chr17:13017121-13017567:13017121-13017582:-	0.204978	SF3B1_HOT	ELAC2	NO	NA	NA
ENSG00000135365.16;A3:chr11:45946098-45948886:45946003-45948886:-	-0.165753	SF3B1_HOT	PHF21A	NO	NA	NA
ENSG00000152256.14;AF:chr2:172556102:172556346-172558708:172556565:172556627-172558708:+	-0.36446	SF3B1_HOT	PDK1	NO	NA	NA
ENSG00000140525.19;A5:chr15:89244067-89247629:89244044-89247629:+	-0.203193	SF3B1_HOT	FANCI	NO	NA	NA
ENSG00000144120.13;A5:chr2:119679276-119680832:119679225-119680832:+	0.250668	SF3B1_HOT	TMEM177	NO	NA	NA
ENSG00000133812.16;SE:chr11:9817024-9828126:9828221-9829356:-	-0.11502	SF3B1_HOT	SBF2	NO	NA	NA
ENSG00000127511.9;SE:chr19:16862559-16862884:16862979-16863680:+	-0.126456	SF3B1_HOT	SIN3B	NO	NA	NA
ENSG00000121940.16;A5:chr1:108950448-108963361:108950448-108963401:-	-0.32276	SF3B1_HOT	CLCC1	NO	NA	NA
ENSG00000150636.17;MX:chr18:68716594-68734734:68734766-68836749:68716594-68823366:68823416-68836749:+	0.454668	SF3B1_HOT	CCDC102B	NO	NA	NA
ENSG00000177943.14;A3:chr9:136852462-136853102:136852462-136853142:+	-0.103648	SF3B1_HOT	MAMDC4	NO	NA	NA
ENSG00000158669.11;A3:chr8:41612273-41612786:41612273-41612845:+	0.107821	SF3B1_HOT	GPAT4	NO	NA	NA
ENSG00000172354.10;AF:chr7:100673878:100673923-100677498:100676836:100677415-100677498:+	-0.500309	SF3B1_HOT	GNB2	NO	NA	NA
ENSG00000256269.10;AF:chr11:119084930:119085066-119088635:119087987:119088308-119088635:+	-0.259657	SF3B1_HOT	HMBS	NO	NA	NA
ENSG00000099991.18;SE:chr22:24171995-24176111:24176275-24177504:+	0.294577	SF3B1_HOT	CABIN1	NO	NA	NA
ENSG00000100926.15;A5:chr14:24195036-24195346:24195036-24195550:-	0.184659	SF3B1_HOT	TM9SF1	NO	NA	NA
ENSG00000155287.11;SE:chr10:99612599-99613696:99613924-99620045:-	0.100517	SF3B1_HOT	SLC25A28	NO	NA	NA
ENSG00000157601.14;AF:chr21:41420366:41420440-41421838:41420515:41420817-41421838:+	-0.257594	SF3B1_HOT	MX1	NO	NA	NA
ENSG00000115677.17;AF:chr2:241268541-241272761:241272831:241268541-241315570:241315672:-	0.200747	SF3B1_HOT	HDLBP	NO	NA	NA
ENSG00000205268.11;AF:chr8:65782843-65788882:65789084:65782843-65841371:65842064:-	-0.588104	SF3B1_HOT	PDE7A	NO	NA	NA
ENSG00000130844.18;SE:chr19:53555908-53563763:53563792-53569304:+	-0.148534	SF3B1_HOT	ZNF331	NO	NA	NA
ENSG00000206573.9;A5:chr3:9390497-9393988:9390497-9395506:-	-0.263084	SF3B1_HOT	THUMPD3-AS1	NO	NA	NA
ENSG00000042088.14;AL:chr14:89956278-89956578:89957187:89956278-89963108:89963569:+	-0.226541	SF3B1_HOT	TDP1	NO	NA	NA
ENSG00000163644.15;AF:chr4:88278642-88283775:88284261:88278642-88284406:88284769:-	-0.189038	SF3B1_HOT	PPM1K	NO	NA	NA
ENSG00000100124.15;RI:chr22:37832958:37833082-37833159:37833206:-	-0.105178	SF3B1_HOT	ANKRD54	NO	NA	NA
ENSG00000140939.14;A3:chr16:67171457-67173750:67171457-67173862:+	-0.104486	SF3B1_HOT	NOL3	NO	NA	NA
ENSG00000134900.12;SE:chr13:102616500-102616956:102617051-102618722:+	-0.217558	SF3B1_HOT	TPP2	NO	NA	NA
ENSG00000099338.23;AF:chr19:38335849:38335875-38337221:38335996:38336633-38337221:+	0.379975	SF3B1_HOT	CATSPERG	NO	NA	NA
ENSG00000088808.18;SE:chr14:103736202-103737694:103737860-103738679:-	0.179407	SF3B1_HOT	PPP1R13B	NO	NA	NA
ENSG00000108559.12;A3:chr17:5387952-5388802:5387904-5388802:-	0.122222	SF3B1_HOT	NUP88	NO	NA	NA
ENSG00000104177.18;SE:chr15:48149371-48151100:48151171-48151473:-	-0.104836	SF3B1_HOT	MYEF2	NO	NA	NA
ENSG00000133460.19;AF:chr22:23857471:23857531-23862104:23857919:23858156-23862104:+	-0.603905	SF3B1_HOT	SLC2A11	NO	NA	NA
ENSG00000166483.11;AF:chr11:9573670:9574509-9575888:9574687:9575375-9575888:+	0.250454	SF3B1_HOT	WEE1	NO	NA	NA
ENSG00000104325.7;SE:chr8:90001561-90017124:90017326-90018909:+	-0.33223	SF3B1_HOT	DECR1	NO	NA	NA
ENSG00000139546.11;AF:chr12:53501350:53501461-53502015:53501605:53501708-53502015:+	-0.270905	SF3B1_HOT	TARBP2	NO	NA	NA
ENSG00000115657.14;RI:chr2:219210381:219210475-219210711:219210823:-	-0.136138	SF3B1_HOT	ABCB6	NO	NA	NA
ENSG00000042429.12;A3:chr11:93801972-93807501:93801972-93807518:+	-0.114432	SF3B1_HOT	MED17	NO	NA	NA
ENSG00000124508.17;A5:chr6:26383299-26383792:26383244-26383792:+	-0.309628	SF3B1_HOT	BTN2A2	NO	NA	NA
ENSG00000093072.18;A3:chr22:17209723-17219356:17209598-17219356:-	-0.146942	SF3B1_HOT	ADA2	NO	NA	NA
ENSG00000121064.13;AL:chr17:56995018-56995447:56995504:56995018-56995507:56995875:+	-0.62573	SF3B1_HOT	SCPEP1	NO	NA	NA
ENSG00000123992.19;AF:chr2:219387163-219387576:219387796:219387163-219399866:219400022:-	0.2174	SF3B1_HOT	DNPEP	NO	NA	NA
ENSG00000214160.10;AF:chr3:184245812-184248782:184248949:184245812-184249226:184249548:-	-0.551644	SF3B1_HOT	ALG3	NO	NA	NA
ENSG00000173457.11;AF:chr11:64245287-64246054:64246193:64245287-64246416:64246943:-	-0.121271	SF3B1_HOT	PPP1R14B	NO	NA	NA
ENSG00000167978.17;A3:chr16:2769284-2769628:2769284-2769862:+	0.302761	SF3B1_HOT	SRRM2	NO	NA	NA
ENSG00000099331.13;RI:chr19:17202842:17202883-17203147:17203258:+	-0.10741	SF3B1_HOT	MYO9B	NO	NA	NA
ENSG00000110801.14;SE:chr12:121894841-121899634:121899845-121903006:+	-0.111805	SF3B1_HOT	PSMD9	NO	NA	NA
ENSG00000196655.12;AL:chr11:119021886-119023321:119023671:119021886-119024857:119025454:+	-0.184352	SF3B1_HOT	TRAPPC4	NO	NA	NA
ENSG00000075711.21;RI:chr3:197065276:197065464-197065708:197065809:-	0.35093	SF3B1_HOT	DLG1	NO	NA	NA
ENSG00000110777.12;AF:chr11:111358918-111359272:111359406:111358918-111363833:111364277:-	-0.31247	SF3B1_HOT	POU2AF1	NO	NA	NA
ENSG00000169045.17;RI:chr5:179616126:179616218-179617021:179617110:-	-0.137838	SF3B1_HOT	HNRNPH1	NO	NA	NA
ENSG00000183077.15;AL:chr17:78191060-78197135:78197560:78191060-78206911:78207329:+	-0.174685	SF3B1_HOT	AFMID	NO	NA	NA
ENSG00000106462.11;A5:chr7:148832750-148846470:148832750-148846497:-	-0.109666	SF3B1_HOT	EZH2	NO	NA	NA
ENSG00000152256.14;AF:chr2:172556090:172556346-172558708:172556565:172556627-172558708:+	-0.186684	SF3B1_HOT	PDK1	NO	NA	NA
ENSG00000147586.10;AF:chr8:80003180-80029761:80029839:80003180-80029905:80029964:-	0.149731	SF3B1_HOT	MRPS28	NO	NA	NA
ENSG00000167632.17;SE:chr8:140405698-140426615:140426641-140435112:-	-0.117595	SF3B1_HOT	TRAPPC9	NO	NA	NA
ENSG00000185813.11;SE:chr17:81906898-81907204:81907257-81907554:-	-0.137177	SF3B1_HOT	PCYT2	NO	NA	NA
ENSG00000028310.18;SE:chr5:865581-868607:869119-869245:-	0.366826	SF3B1_HOT	BRD9	NO	NA	NA
ENSG00000179104.9;SE:chr12:82687669-82857010:82857580-82895818:+	-0.215519	SF3B1_HOT	TMTC2	NO	NA	NA
ENSG00000171105.14;SE:chr19:7143090-7150497:7150532-7152726:-	-0.102718	SF3B1_HOT	INSR	NO	NA	NA
ENSG00000071082.11;AL:chr2:101006071-101006350:101007267:101006071-101023625:101024032:+	0.181473	SF3B1_HOT	RPL31	NO	NA	NA
ENSG00000235437.8;SE:chrX:63399903-63509944:63510079-63516910:-	-0.255691	SF3B1_HOT	LINC01278	NO	NA	NA
ENSG00000122873.12;SE:chr10:58269304-58276118:58276212-58277117:+	0.437653	SF3B1_HOT	CISD1	NO	NA	NA
ENSG00000133460.19;AF:chr22:23856703:23856991-23862104:23857471:23857531-23862104:+	0.210337	SF3B1_HOT	SLC2A11	NO	NA	NA
ENSG00000033011.13;AF:chr16:5071843:5072057-5072951:5072205:5072318-5072951:+	-0.231138	SF3B1_HOT	ALG1	NO	NA	NA
ENSG00000147789.15;AF:chr8:144827579:144827609-144829043:144827618:144827812-144829043:+	0.219237	SF3B1_HOT	ZNF7	NO	NA	NA
ENSG00000106479.11;A5:chr7:149838635-149844625:149838461-149844625:+	-0.177521	SF3B1_HOT	ZNF862	NO	NA	NA
ENSG00000107372.13;AF:chr9:72363606-72364462:72364626:72363606-72364696:72365208:-	0.178848	SF3B1_HOT	ZFAND5	NO	NA	NA
ENSG00000169519.21;A3:chr11:28290397-28296753:28290397-28296797:+	0.192976	SF3B1_HOT	METTL15	NO	NA	NA
ENSG00000249709.8;MX:chr19:12528696-12541425:12541537-12551330:12528696-12550463:12550652-12551330:-	-0.392038	SF3B1_HOT	ZNF564	NO	NA	NA
ENSG00000106610.15;A3:chr7:67306083-67308577:67306083-67308935:+	-0.154319	SF3B1_HOT	STAG3L4	NO	NA	NA
ENSG00000110066.15;AF:chr11:68190152-68213138:68213286:68190152-68213477:68213595:-	-0.513509	SF3B1_HOT	KMT5B	NO	NA	NA
ENSG00000095066.11;AF:chr19:12774897-12775405:12775523:12774897-12778300:12778420:-	-0.245454	SF3B1_HOT	HOOK2	NO	NA	NA
ENSG00000132680.11;RI:chr1:155913045:155914320-155915873:155915964:-	-0.223558	SF3B1_HOT	KHDC4	NO	NA	NA
ENSG00000105819.14;AL:chr7:103312131-103312207:103314686:103312131-103328931:103329511:+	0.120046	SF3B1_HOT	PMPCB	NO	NA	NA
ENSG00000110911.16;AF:chr12:51010766-51025775:51026141:51010766-51026310:51026393:-	-0.496559	SF3B1_HOT	SLC11A2	NO	NA	NA
ENSG00000135486.18;AF:chr12:54280193:54280822-54281386:54281186:54281295-54281386:+	0.175031	SF3B1_HOT	HNRNPA1	NO	NA	NA
ENSG00000139546.11;AF:chr12:53501305:53501461-53502015:53501605:53501708-53502015:+	-0.325265	SF3B1_HOT	TARBP2	NO	NA	NA
ENSG00000205572.10;AL:chr5:70026515-70032315:70032694:70026515-70041524:70043113:+	-0.124696	SF3B1_HOT	SERF1B	NO	NA	NA
ENSG00000079805.17;AL:chr19:10830378-10830978:10831884:10830378-10832304:10833484:+	0.55015	SF3B1_HOT	DNM2	NO	NA	NA
ENSG00000141458.13;AL:chr18:23528207:23529727-23533355:23531442:23532284-23533355:-	-0.128576	SF3B1_HOT	NPC1	NO	NA	NA
ENSG00000173209.23;SE:chr2:61181405-61183547:61183662-61184712:+	0.116629	SF3B1_HOT	AHSA2P	NO	NA	NA
ENSG00000206503.13;RI:chr6:29942757:29942854-29943285:29943543:+	0.402266	SF3B1_HOT	HLA-A	NO	NA	NA
ENSG00000134575.13;A3:chr11:47248133-47248676:47247727-47248676:-	-0.18067	SF3B1_HOT	ACP2	NO	NA	NA
ENSG00000114745.13;A3:chr3:39100503-39100747:39100454-39100747:-	0.283355	SF3B1_HOT	GORASP1	NO	NA	NA
ENSG00000040341.18;SE:chr8:73688813-73709032:73709177-73738284:-	-0.145449	SF3B1_HOT	STAU2	NO	NA	NA
ENSG00000171792.11;AF:chr12:2876258:2876515-2887911:2877208:2877282-2887911:+	0.277643	SF3B1_HOT	RHNO1	NO	NA	NA
ENSG00000223960.7;AL:chr2:178430889-178431047:178433024:178430889-178433382:178434067:+	-0.313798	SF3B1_HOT	CHROMR	NO	NA	NA
ENSG00000165119.21;AF:chr9:83978452-83980153:83980250:83978452-83980503:83980604:-	0.104152	SF3B1_HOT	HNRNPK	NO	NA	NA
ENSG00000121310.17;A3:chr1:52906611-52907868:52905090-52907868:-	0.21723	SF3B1_HOT	ECHDC2	NO	NA	NA
ENSG00000042088.14;SE:chr14:89955970-89956578:89956800-89963108:+	-0.183428	SF3B1_HOT	TDP1	NO	NA	NA
ENSG00000131165.16;AF:chr16:89653923-89654338:89654613:89653923-89656633:89657708:-	-0.398783	SF3B1_HOT	CHMP1A	NO	NA	NA
ENSG00000204435.14;AF:chr6:31665236:31665493-31666821:31666094:31666208-31666821:+	-0.124775	SF3B1_HOT	CSNK2B	NO	NA	NA
ENSG00000184470.21;AF:chr22:19931098-19933434:19933526:19931098-19941701:19941818:-	-0.101913	SF3B1_HOT	TXNRD2	NO	NA	NA
ENSG00000147789.15;AL:chr8:144837507-144838008:144838848:144837507-144841355:144841579:+	-0.176381	SF3B1_HOT	ZNF7	NO	NA	NA
ENSG00000130475.14;AF:chr19:17747745:17747814-17754317:17751477:17751577-17754317:+	-0.130072	SF3B1_HOT	FCHO1	NO	NA	NA
ENSG00000064225.12;AL:chr3:98773983-98782207:98782460:98773983-98783563:98783739:+	-0.110009	SF3B1_HOT	ST3GAL6	NO	NA	NA
ENSG00000134899.23;AF:chr13:102845831:102846354-102852118:102848739:102849194-102852118:+	0.103071	SF3B1_HOT	ERCC5	NO	NA	NA
ENSG00000197958.13;A5:chr9:127449362-127449610:127449362-127450731:-	0.175346	SF3B1_HOT	RPL12	NO	NA	NA
ENSG00000159592.11;SE:chr1:45661225-45685576:45685620-45687983:-	0.116441	SF3B1_HOT	GPBP1L1	NO	NA	NA
ENSG00000126351.13;A3:chr17:40089333-40093020:40089333-40093137:+	0.281659	SF3B1_HOT	THRA	NO	NA	NA
ENSG00000120334.15;A5:chr1:173824019-173824138:173824019-173824212:-	0.210052	SF3B1_HOT	CENPL	NO	NA	NA
ENSG00000231389.7;A3:chr6:33073772-33080680:33073669-33080680:-	-0.150723	SF3B1_HOT	HLA-DPA1	NO	NA	NA
ENSG00000213983.12;RI:chr14:23561512:23561635-23561962:23562415:-	-0.14244	SF3B1_HOT	AP1G2	NO	NA	NA
ENSG00000111540.16;AF:chr12:55973913:55974000-55986869:55974074:55974139-55986869:+	-0.509221	SF3B1_HOT	RAB5B	NO	NA	NA
ENSG00000124357.13;RI:chr2:71068650:71068712-71070502:71070586:+	-0.206445	SF3B1_HOT	NAGK	NO	NA	NA
ENSG00000133460.19;AF:chr22:23856703:23856991-23862104:23857000:23857531-23862104:+	-0.134163	SF3B1_HOT	SLC2A11	NO	NA	NA
ENSG00000109762.16;AL:chr4:185362711-185363385:185363971:185362711-185369750:185370185:+	-0.583214	SF3B1_HOT	SNX25	NO	NA	NA
ENSG00000031823.14;SE:chr19:5941835-5951393:5951596-5957918:-	-0.180751	SF3B1_HOT	RANBP3	NO	NA	NA
ENSG00000137817.17;SE:chr15:72250092-72250845:72250954-72251207:-	-0.142488	SF3B1_HOT	PARP6	NO	NA	NA
ENSG00000099840.14;SE:chr19:2098804-2098976:2099029-2099255:+	0.294124	SF3B1_HOT	IZUMO4	NO	NA	NA
ENSG00000147687.19;AF:chr8:124523002-124538331:124538469:124523002-124538928:124539088:-	-0.205565	SF3B1_HOT	TATDN1	NO	NA	NA
ENSG00000079432.7;AF:chr19:42279992:42280203-42286771:42284020:42284771-42286771:+	-0.351956	SF3B1_HOT	CIC	NO	NA	NA
ENSG00000166986.15;AF:chr12:57488062:57488199-57489019:57488212:57488661-57489019:+	0.380074	SF3B1_HOT	MARS1	NO	NA	NA
ENSG00000067064.11;A3:chr10:1044171-1048864:1043393-1048864:-	-0.273418	SF3B1_HOT	IDI1	NO	NA	NA
ENSG00000087460.26;AF:chr20:58889171:58889353-58895612:58891364:58891865-58895612:+	-0.137645	SF3B1_HOT	GNAS	NO	NA	NA
ENSG00000168970.22;RI:chr15:41845943:41846047-41846203:41846382:+	0.106927	SF3B1_HOT	JMJD7-PLA2G4B	NO	NA	NA
ENSG00000083838.16;RI:chr19:58479643:58479727-58479930:58480019:+	-0.191854	SF3B1_HOT	ZNF446	NO	NA	NA
ENSG00000108946.15;A5:chr17:68513271-68515394:68512978-68515394:+	-0.189052	SF3B1_HOT	PRKAR1A	NO	NA	NA
ENSG00000172775.17;AF:chr16:57173869-57174620:57174886:57173869-57185825:57186040:-	-0.241057	SF3B1_HOT	PSME3IP1	NO	NA	NA
ENSG00000104375.17;A3:chr8:98595750-98596032:98595045-98596032:-	-0.572784	SF3B1_HOT	STK3	NO	NA	NA
ENSG00000240498.9;AL:chr9:21995161-22012128:22015088:21995161-22029433:22031041:+	0.258447	SF3B1_HOT	CDKN2B-AS1	NO	NA	NA
ENSG00000169045.17;A5:chr5:179616218-179616869:179616218-179617021:-	-0.120434	SF3B1_HOT	HNRNPH1	NO	NA	NA
ENSG00000033030.15;RI:chr12:122483279:122483344-122483460:122483563:-	-0.245381	SF3B1_HOT	ZCCHC8	NO	NA	NA
ENSG00000156313.15;SE:chrX:38276772-38287094:38288041-38290959:-	-0.397699	SF3B1_HOT	RPGR	NO	NA	NA
ENSG00000164548.11;MX:chr7:23521840-23522132:23522432-23531789:23521840-23531181:23531270-23531789:-	0.41257	SF3B1_HOT	TRA2A	NO	NA	NA
ENSG00000137055.15;SE:chr9:26913947-26917097:26917165-26919310:-	0.104052	SF3B1_HOT	PLAA	NO	NA	NA
ENSG00000087460.26;AF:chr20:58891760:58891865-58895612:58892078:58892209-58895612:+	-0.332948	SF3B1_HOT	GNAS	NO	NA	NA
ENSG00000182196.13;AF:chr12:122980231:122980385-122981129:122980495:122980887-122981129:+	0.191122	SF3B1_HOT	ARL6IP4	NO	NA	NA
ENSG00000140474.14;SE:chr15:74842420-74842535:74842674-74843004:-	-0.106266	SF3B1_HOT	ULK3	NO	NA	NA
ENSG00000079805.17;SE:chr19:10805967-10808569:10808580-10812264:+	-0.272467	SF3B1_HOT	DNM2	NO	NA	NA
ENSG00000126581.13;A5:chr17:42818415-42818544:42818415-42819548:-	-0.150746	SF3B1_HOT	BECN1	NO	NA	NA
ENSG00000066933.16;AF:chr15:72032588-72045724:72046636:72032588-72117680:72117999:-	0.24114	SF3B1_HOT	MYO9A	NO	NA	NA
ENSG00000125450.11;SE:chr17:75205794-75208504:75208620-75209823:+	-0.184883	SF3B1_HOT	NUP85	NO	NA	NA
ENSG00000120458.13;AF:chr11:124779139-124783171:124783290:124779139-124799871:124800364:-	-0.162246	SF3B1_HOT	MSANTD2	NO	NA	NA
ENSG00000138777.20;AF:chr4:105456745-105473340:105473709:105456745-105473894:105474062:-	0.321932	SF3B1_HOT	PPA2	NO	NA	NA
ENSG00000237499.7;A3:chr6:137865372-137866583:137865320-137866583:-	0.228926	SF3B1_HOT	WAKMAR2	NO	NA	NA
ENSG00000177943.14;SE:chr9:136856149-136856257:136856381-136856464:+	-0.153734	SF3B1_HOT	MAMDC4	NO	NA	NA
ENSG00000119777.20;A3:chr2:27037702-27037790:27037702-27037815:+	0.264023	SF3B1_HOT	TMEM214	NO	NA	NA
ENSG00000100523.16;SE:chr14:53093444-53096117:53096218-53103683:-	0.205923	SF3B1_HOT	DDHD1	NO	NA	NA
ENSG00000085760.15;A5:chr2:55267635-55268817:55267635-55269169:-	0.436928	SF3B1_HOT	MTIF2	NO	NA	NA
ENSG00000127483.19;AF:chr1:20780540-20786514:20786640:20780540-20787195:20787307:-	0.116222	SF3B1_HOT	HP1BP3	NO	NA	NA
ENSG00000170476.16;SE:chr5:139388131-139388461:139388601-139389680:-	-0.222158	SF3B1_HOT	MZB1	NO	NA	NA
ENSG00000158793.14;AL:chr1:161120232-161120499:161121194:161120232-161124141:161125445:+	0.143216	SF3B1_HOT	NIT1	NO	NA	NA
ENSG00000188542.10;AF:chr2:240562487:240562596-240563674:240562983:240563130-240563674:+	0.324906	SF3B1_HOT	DUSP28	NO	NA	NA
ENSG00000115053.16;AF:chr2:231463316-231463586:231463693:231463316-231463701:231464180:-	0.450532	SF3B1_HOT	NCL	NO	NA	NA
ENSG00000143774.16;AF:chr1:228140302:228140363-228145511:228144328:228144752-228145511:+	-0.174791	SF3B1_HOT	GUK1	NO	NA	NA
ENSG00000175197.12;RI:chr12:57517269:57517438-57517706:57517753:-	-0.124229	SF3B1_HOT	DDIT3	NO	NA	NA
ENSG00000063854.13;SE:chr16:1823037-1826507:1826602-1826712:-	0.136005	SF3B1_HOT	HAGH	NO	NA	NA
ENSG00000115042.10;AF:chr2:95402708:95402872-95405553:95405274:95405402-95405553:+	0.13249	SF3B1_HOT	FAHD2A	NO	NA	NA
ENSG00000184924.5;AF:chr2:24790581-24792767:24793074:24790581-24793126:24793382:-	0.147443	SF3B1_HOT	PTRHD1	NO	NA	NA
ENSG00000099622.14;SE:chr19:1272051-1273601:1273715-1274307:+	-0.118446	SF3B1_HOT	CIRBP	NO	NA	NA
ENSG00000121940.16;A5:chr1:108950448-108962309:108950448-108963381:-	-0.157158	SF3B1_HOT	CLCC1	NO	NA	NA
ENSG00000175376.9;A5:chr11:66000505-66001910:66000505-66002040:-	-0.165969	SF3B1_HOT	EIF1AD	NO	NA	NA
ENSG00000047346.12;SE:chr15:52584944-52587056:52587219-52593578:-	0.237979	SF3B1_HOT	FAM214A	NO	NA	NA
ENSG00000135185.12;A5:chr7:87219718-87220217:87219718-87220361:-	-0.104385	SF3B1_HOT	TMEM243	NO	NA	NA
ENSG00000114745.13;AF:chr3:39103553-39106988:39107336:39103553-39107479:39107630:-	0.154693	SF3B1_HOT	GORASP1	NO	NA	NA
ENSG00000083520.15;SE:chr13:72781003-72781289:72781356-72781605:-	0.258001	SF3B1_HOT	DIS3	YES	NA	NA
ENSG00000141458.13;AL:chr18:23522315:23522906-23533355:23531442:23532284-23533355:-	-0.156324	SF3B1_HOT	NPC1	NO	NA	NA
ENSG00000162241.12;AF:chr11:65380175-65380534:65380989:65380175-65381915:65382373:-	0.107813	SF3B1_HOT	SLC25A45	NO	NA	NA
ENSG00000102984.15;AF:chr16:71883273-71883423:71883487:71883273-71883908:71884190:-	-0.240016	SF3B1_HOT	ZNF821	NO	NA	NA
ENSG00000075711.21;AL:chr3:197042985:197044729-197051577:197047379:197050659-197051577:-	0.652029	SF3B1_HOT	DLG1	NO	NA	NA
ENSG00000164022.17;AF:chr4:106315544:106315636-106324985:106320477:106320889-106324985:+	0.345075	SF3B1_HOT	AIMP1	NO	NA	NA
ENSG00000040341.18;A3:chr8:73709177-73738284:73709162-73738284:-	-0.228851	SF3B1_HOT	STAU2	NO	NA	NA
ENSG00000196756.13;AF:chr20:38426503-38427680:38429330:38426503-38429954:38430213:-	-0.499661	SF3B1_HOT	SNHG17	NO	NA	NA
ENSG00000183506.17;A3:chr22:21476741-21477790:21476160-21477790:-	-0.193022	SF3B1_HOT	PI4KAP2	NO	NA	NA
ENSG00000163681.16;SE:chr3:57864716-57865242:57865292-57890041:+	0.121231	SF3B1_HOT	SLMAP	NO	NA	NA
ENSG00000196628.20;RI:chr18:55228847:55229076-55232521:55232671:-	-0.253157	SF3B1_HOT	TCF4	NO	NA	NA
ENSG00000183506.17;A3:chr22:21476764-21477790:21476160-21477790:-	-0.252353	SF3B1_HOT	PI4KAP2	NO	NA	NA
ENSG00000119777.20;A3:chr2:27037892-27038032:27037892-27038146:+	0.125806	SF3B1_HOT	TMEM214	NO	NA	NA
ENSG00000178950.17;AF:chr4:913668-915498:915678:913668-932043:932365:-	-0.523027	SF3B1_HOT	GAK	NO	NA	NA
ENSG00000163681.16;MX:chr3:57864716-57865242:57865292-57890041:57864716-57871636:57871698-57890041:+	0.173556	SF3B1_HOT	SLMAP	NO	NA	NA
ENSG00000133706.19;AF:chr5:146177665-146182140:146182475:146177665-146182488:146182650:-	0.387434	SF3B1_HOT	LARS1	NO	NA	NA
ENSG00000128739.23;A3:chr15:24968082-24974311:24968082-24974387:+	0.215607	SF3B1_HOT	SNRPN	NO	NA	NA
ENSG00000214413.9;AF:chr10:110918213-110918845:110918936:110918213-110919121:110919180:-	0.505036	SF3B1_HOT	BBIP1	NO	NA	NA
ENSG00000067064.11;RI:chr10:1043301:1043393-1043999:1044171:-	-0.128882	SF3B1_HOT	IDI1	NO	NA	NA
ENSG00000013561.18;AF:chr5:141969105:141969167-141970704:141969269:141969617-141970704:+	-0.264596	SF3B1_HOT	RNF14	NO	NA	NA
ENSG00000242086.8;AF:chr3:195683773:195683865-195688533:195687821:195688319-195688533:+	-0.292055	SF3B1_HOT	MUC20-OT1	NO	NA	NA
ENSG00000179818.14;SE:chr2:70085624-70085816:70085930-70086978:-	-0.156201	SF3B1_HOT	PCBP1-AS1	NO	NA	NA
ENSG00000166965.12;AF:chr15:90954881:90954948-90956612:90955393:90955883-90956612:+	0.435758	SF3B1_HOT	RCCD1	NO	NA	NA
ENSG00000087111.21;SE:chr17:28570963-28571049:28571188-28571463:-	0.224584	SF3B1_HOT	PIGS	NO	NA	NA
ENSG00000205352.11;A3:chr12:53442733-53443487:53442733-53443679:+	-0.436404	SF3B1_HOT	PRR13	NO	NA	NA
ENSG00000081189.16;AF:chr5:88823930-88827036:88827192:88823930-88884489:88884568:-	-0.37562	SF3B1_HOT	MEF2C	NO	NA	NA
ENSG00000205352.11;A3:chr12:53442733-53443487:53442733-53443541:+	-0.287526	SF3B1_HOT	PRR13	NO	NA	NA
ENSG00000139597.18;A5:chr13:32416029-32416499:32416029-32416551:-	-0.189011	SF3B1_HOT	N4BP2L1	NO	NA	NA
ENSG00000101246.20;AF:chr20:63706738-63706999:63707658:63706738-63707867:63708025:-	-0.363682	SF3B1_HOT	ARFRP1	NO	NA	NA
ENSG00000075711.21;AF:chr3:197297235-197297353:197297523:197297235-197297544:197297871:-	-0.470213	SF3B1_HOT	DLG1	NO	NA	NA
ENSG00000162777.17;AF:chr1:111199798-111200393:111200646:111199798-111204296:111204409:-	-0.149307	SF3B1_HOT	DENND2D	NO	NA	NA
ENSG00000120899.18;AF:chr8:27325564:27325681-27397548:27380651:27380792-27397548:+	-0.358625	SF3B1_HOT	PTK2B	NO	NA	NA
ENSG00000181038.14;SE:chr17:76726879-76726970:76727178-76732978:+	0.253975	SF3B1_HOT	METTL23	NO	NA	NA
ENSG00000109762.16;AF:chr4:185204237:185204467-185247294:185209577:185210255-185247294:+	-0.386149	SF3B1_HOT	SNX25	NO	NA	NA
ENSG00000168385.18;SE:chr2:241315982-241324216:241324241-241335126:+	0.217	SF3B1_HOT	SEPTIN2	NO	NA	NA
ENSG00000136051.15;A3:chr12:105120597-105121089:105120597-105121101:+	-0.263841	SF3B1_HOT	WASHC4	NO	NA	NA
ENSG00000105926.15;AF:chr7:24573346:24573593-24623666:24574013:24574278-24623666:+	-0.253897	SF3B1_HOT	MPP6	NO	NA	NA
ENSG00000189050.16;SE:chr17:59958444-59962540:59962616-59962827:-	0.221474	SF3B1_HOT	RNFT1	NO	NA	NA
ENSG00000131503.21;A3:chr5:140436257-140438494:140436257-140438503:+	-0.629222	SF3B1_HOT	ANKHD1	NO	NA	NA
ENSG00000135452.10;A5:chr12:57745231-57745745:57745217-57745745:+	0.220309	SF3B1_HOT	TSPAN31	NO	NA	NA
ENSG00000182552.15;SE:chr4:183651131-183651218:183651323-183655881:-	0.315087	SF3B1_HOT	RWDD4	NO	NA	NA
ENSG00000163138.19;SE:chr4:20700787-20702141:20702221-20704466:+	-0.1194	SF3B1_HOT	PACRGL	NO	NA	NA
ENSG00000204954.10;AF:chr12:103956748-103957069:103957215:103956748-103965516:103965708:-	0.149319	SF3B1_HOT	C12orf73	NO	NA	NA
ENSG00000183597.16;SE:chr22:20052584-20053437:20053551-20055943:+	-0.135903	SF3B1_HOT	TANGO2	NO	NA	NA
ENSG00000137807.15;SE:chr15:69440487-69440768:69441079-69444790:+	-0.305833	SF3B1_HOT	KIF23	NO	NA	NA
ENSG00000164022.17;AF:chr4:106315544:106315636-106324985:106316578:106320713-106324985:+	0.216105	SF3B1_HOT	AIMP1	NO	NA	NA
ENSG00000075711.21;AL:chr3:197044095:197044729-197051577:197047379:197050659-197051577:-	0.187379	SF3B1_HOT	DLG1	NO	NA	NA
ENSG00000245937.8;SE:chr5:128061244-128062370:128062500-128082970:-	0.100613	SF3B1_HOT	LINC01184	NO	NA	NA
ENSG00000139546.11;A5:chr12:53503212-53503730:53503129-53503730:+	0.186801	SF3B1_HOT	TARBP2	NO	NA	NA
ENSG00000135164.19;A3:chr7:87181341-87182056:87181341-87182228:+	0.112394	SF3B1_HOT	DMTF1	NO	NA	NA
ENSG00000250571.7;AL:chr8:143274802-143274978:143275694:143274802-143275897:143276170:+	-0.208916	SF3B1_HOT	GLI4	NO	NA	NA
ENSG00000141376.22;SE:chr17:61380571-61388618:61388708-61391977:+	0.117738	SF3B1_HOT	BCAS3	NO	NA	NA
ENSG00000130731.16;A5:chr16:634797-634889:634797-635612:-	0.103551	SF3B1_HOT	METTL26	NO	NA	NA
ENSG00000104973.19;RI:chr19:49836226:49836406-49836847:49836979:+	-0.257308	SF3B1_HOT	MED25	NO	NA	NA
ENSG00000179818.14;SE:chr2:70051305-70083538:70083687-70085547:-	-0.143851	SF3B1_HOT	PCBP1-AS1	NO	NA	NA
ENSG00000170633.16;SE:chr12:121402807-121404849:121405113-121416159:+	-0.148755	SF3B1_HOT	RNF34	NO	NA	NA
ENSG00000104325.7;A3:chr8:90001561-90017124:90001561-90017302:+	0.316242	SF3B1_HOT	DECR1	NO	NA	NA
ENSG00000111843.14;A3:chr6:10723241-10724556:10723241-10724570:+	-0.228178	SF3B1_HOT	TMEM14C	NO	NA	NA
ENSG00000132694.19;SE:chr1:156970043-156971697:156971816-156976983:-	-0.167549	SF3B1_HOT	ARHGEF11	NO	NA	NA
ENSG00000111540.16;AF:chr12:55973913:55974000-55986869:55974078:55974139-55986869:+	-0.611753	SF3B1_HOT	RAB5B	NO	NA	NA
ENSG00000115053.16;AF:chr2:231463316-231463586:231463693:231463316-231464336:231464379:-	0.447941	SF3B1_HOT	NCL	NO	NA	NA
ENSG00000159069.14;A3:chr9:136943003-136943349:136942973-136943349:-	-0.301458	SF3B1_HOT	FBXW5	NO	NA	NA
ENSG00000204954.10;AF:chr12:103956748-103957069:103957213:103956748-103965516:103965708:-	0.365069	SF3B1_HOT	C12orf73	NO	NA	NA
ENSG00000087053.20;SE:chr11:95838207-95841617:95841709-95844953:-	-0.242346	SF3B1_HOT	MTMR2	NO	NA	NA
ENSG00000138709.19;SE:chr4:128207383-128220355:128220440-128222349:+	-0.418177	SF3B1_HOT	LARP1B	NO	NA	NA
ENSG00000167978.17;AF:chr16:2767507:2768261-2768997:2768551:2768767-2768997:+	-0.136195	SF3B1_HOT	SRRM2	NO	NA	NA
ENSG00000176142.13;SE:chr3:119447172-119451209:119451317-119452447:-	-0.115643	SF3B1_HOT	TMEM39A	NO	NA	NA
ENSG00000131748.16;AF:chr17:39637141:39637231-39653481:39653098:39653158-39653481:+	0.280457	SF3B1_HOT	STARD3	NO	NA	NA
ENSG00000106608.17;AL:chr7:43878944:43879260-43881659:43881138:43881275-43881659:-	-0.402936	SF3B1_HOT	URGCP	NO	NA	NA
ENSG00000147955.17;A5:chr9:34635858-34636997:34635858-34637220:-	0.143385	SF3B1_HOT	SIGMAR1	NO	NA	NA
ENSG00000033030.15;SE:chr12:122482695-122483279:122483563-122489386:-	-0.248339	SF3B1_HOT	ZCCHC8	NO	NA	NA
ENSG00000205937.12;AF:chr16:2264331-2264573:2265250:2264331-2268055:2268397:-	0.203366	SF3B1_HOT	RNPS1	NO	NA	NA
ENSG00000109118.14;A3:chr17:28911384-28912482:28911237-28912482:-	-0.1209	SF3B1_HOT	PHF12	NO	NA	NA
ENSG00000174928.16;SE:chr3:155802591-155805597:155805723-155806139:-	-0.133973	SF3B1_HOT	C3orf33	NO	NA	NA
ENSG00000172273.13;AF:chr11:119121616:119121639-119126935:119123733:119124236-119126935:+	0.200329	SF3B1_HOT	HINFP	NO	NA	NA
ENSG00000133641.18;SE:chr12:88035738-88040148:88040265-88042825:+	0.16604	SF3B1_HOT	C12orf29	NO	NA	NA
ENSG00000179240.12;A5:chr11:76382293-76403660:76382210-76403660:+	0.331138	SF3B1_HOT	GVQW3	NO	NA	NA
ENSG00000168028.14;A3:chr3:39406764-39407603:39406764-39407621:+	-0.102622	SF3B1_HOT	RPSA	NO	NA	NA
ENSG00000144535.20;AL:chr2:232335874-232336141:232336973:232335874-232340724:232340999:+	-0.40351	SF3B1_HOT	DIS3L2	NO	NA	NA
ENSG00000135365.16;A5:chr11:45938312-45945840:45938312-45946076:-	-0.13805	SF3B1_HOT	PHF21A	NO	NA	NA
ENSG00000185963.14;RI:chr9:92711363:92713461-92715253:92715463:-	-0.209973	SF3B1_HOT	BICD2	NO	NA	NA
ENSG00000090263.16;AF:chr7:141010660-141014352:141014429:141010660-141014551:141014679:-	-0.279418	SF3B1_HOT	MRPS33	NO	NA	NA
ENSG00000169756.16;AF:chr2:108621251:108621461-108659605:108655016:108655256-108659605:+	-0.649338	SF3B1_HOT	LIMS1	NO	NA	NA
ENSG00000164088.18;AF:chr3:52245759:52246048-52246695:52246170:52246314-52246695:+	0.123216	SF3B1_HOT	PPM1M	NO	NA	NA
ENSG00000135297.16;AL:chr6:73466606-73471460:73471795:73466606-73473365:73473411:+	0.256088	SF3B1_HOT	MTO1	NO	NA	NA
ENSG00000124596.17;A5:chr6:41071675-41072319:41071675-41072335:-	-0.103822	SF3B1_HOT	OARD1	NO	NA	NA
ENSG00000143258.16;RI:chr1:161164534:161164612-161164835:161164942:+	-0.146527	SF3B1_HOT	USP21	NO	NA	NA
ENSG00000142046.15;AF:chr19:41354169:41354315-41378281:41376533:41376854-41378281:+	-0.283842	SF3B1_HOT	TMEM91	NO	NA	NA
ENSG00000063978.16;AF:chr4:2468729:2468927-2490337:2469107:2469258-2490337:+	-0.450885	SF3B1_HOT	RNF4	NO	NA	NA
ENSG00000091527.16;AF:chr3:133574434:133574551-133575039:133574648:133574756-133575039:+	0.10044	SF3B1_HOT	CDV3	NO	NA	NA
ENSG00000090554.13;A3:chr19:49474672-49475674:49474672-49475691:+	-0.118908	SF3B1_HOT	FLT3LG	NO	NA	NA
ENSG00000141644.17;AL:chr18:50266882:50267663-50272677:50269031:50269818-50272677:-	0.113623	SF3B1_HOT	MBD1	NO	NA	NA
ENSG00000239213.6;A5:chr3:136846586-136861573:136846586-136861615:-	-0.318743	SF3B1_HOT	NCK1-DT	NO	NA	NA
ENSG00000067064.11;AF:chr10:1043393-1048264:1048397:1043393-1048864:1049103:-	-0.248218	SF3B1_HOT	IDI1	NO	NA	NA
ENSG00000145901.16;AF:chr5:151065131-151080880:151081084:151065131-151087085:151087158:-	-0.203314	SF3B1_HOT	TNIP1	NO	NA	NA
ENSG00000197694.18;AF:chr9:128552593:128552696-128566738:128553147:128553311-128566738:+	0.564165	SF3B1_HOT	SPTAN1	NO	NA	NA
ENSG00000105223.20;A3:chr19:40348768-40365553:40348768-40365718:+	0.129443	SF3B1_HOT	PLD3	NO	NA	NA
ENSG00000115677.17;AF:chr2:241268541-241271917:241271971:241268541-241272761:241272863:-	-0.358406	SF3B1_HOT	HDLBP	NO	NA	NA
ENSG00000099956.20;RI:chr22:23800944:23801135-23803295:23803422:+	-0.229307	SF3B1_HOT	SMARCB1	NO	NA	NA
ENSG00000175470.20;SE:chr10:131901330-131911562:131912598-131934458:+	-0.118606	SF3B1_HOT	PPP2R2D	NO	NA	NA
ENSG00000230606.11;AF:chr2:97423918-97425878:97426072:97423918-97429217:97429871:-	-0.339873	SF3B1_HOT	AC092683.1	NO	NA	NA
ENSG00000109927.10;A3:chr11:121160421-121162075:121160421-121162090:+	-0.200653	SF3B1_HOT	TECTA	NO	NA	NA
ENSG00000108946.15;AF:chr17:68512415:68512548-68515394:68512882:68512978-68515394:+	-0.12179	SF3B1_HOT	PRKAR1A	NO	NA	NA
ENSG00000104047.15;A3:chr15:49625431-49630824:49625431-49630956:+	0.118838	SF3B1_HOT	DTWD1	NO	NA	NA
ENSG00000144120.13;AL:chr2:119679276-119680832:119682118:119679276-119685658:119686464:+	0.364799	SF3B1_HOT	TMEM177	NO	NA	NA
ENSG00000221978.12;A5:chr1:1390865-1392679:1390865-1392790:-	-0.298266	SF3B1_HOT	CCNL2	NO	NA	NA
ENSG00000003756.17;RI:chr3:50117074:50117171-50117250:50117379:+	-0.102314	SF3B1_HOT	RBM5	NO	NA	NA
ENSG00000142867.14;A5:chr1:85270906-85274944:85270906-85276296:-	-0.183829	SF3B1_HOT	BCL10	NO	NA	NA
ENSG00000214413.9;AF:chr10:110918213-110918845:110918936:110918213-110919121:110919201:-	0.563614	SF3B1_HOT	BBIP1	NO	NA	NA
ENSG00000147586.10;AF:chr8:80028796-80029905:80029974:80028796-80030054:80030232:-	0.279814	SF3B1_HOT	MRPS28	NO	NA	NA
ENSG00000181513.15;AL:chr17:45139160-45142583:45142959:45139160-45143443:45144181:+	-0.168951	SF3B1_HOT	ACBD4	NO	NA	NA
ENSG00000119777.20;SE:chr2:27037702-27037815:27037892-27038146:+	-0.170528	SF3B1_HOT	TMEM214	NO	NA	NA
ENSG00000121864.10;SE:chr3:179323291-179324950:179324993-179327561:+	-0.410964	SF3B1_HOT	ZNF639	NO	NA	NA
ENSG00000140983.14;RI:chr16:670892:671000-671115:671203:+	0.129474	SF3B1_HOT	RHOT2	NO	NA	NA
ENSG00000111271.15;MX:chr12:111709684-111712498:111712657-111721671:111709684-111715821:111715962-111721671:+	-0.185047	SF3B1_HOT	ACAD10	NO	NA	NA
ENSG00000146828.18;AF:chr7:100852777:100852839-100854156:100853286:100853446-100854156:+	-0.481407	SF3B1_HOT	SLC12A9	NO	NA	NA
ENSG00000189403.15;AF:chr13:30463694-30465073:30465242:30463694-30465796:30465914:-	0.157546	SF3B1_HOT	HMGB1	NO	NA	NA
ENSG00000169398.19;SE:chr8:140890769-140925661:140925749-141001125:-	-0.501445	SF3B1_HOT	PTK2	NO	NA	NA
ENSG00000168255.20;SE:chr7:102567083-102568010:102568184-102569835:-	0.234638	SF3B1_HOT	POLR2J3	NO	NA	NA
ENSG00000102225.16;A3:chrX:47227099-47227160:47227099-47227181:+	-0.132794	SF3B1_HOT	CDK16	NO	NA	NA
ENSG00000234912.12;AL:chr17:77093347-77094070:77094983:77093347-77098165:77099506:+	-0.170457	SF3B1_HOT	SNHG20	NO	NA	NA
ENSG00000114098.18;SE:chr3:138187599-138209817:138209893-138221926:+	-0.13164	SF3B1_HOT	ARMC8	NO	NA	NA
ENSG00000121073.15;AF:chr17:49707444-49707730:49707949:49707444-49708076:49708166:-	0.215682	SF3B1_HOT	SLC35B1	NO	NA	NA
ENSG00000156304.15;A3:chr21:31696750-31700995:31696736-31700995:-	0.103989	SF3B1_HOT	SCAF4	NO	NA	NA
ENSG00000032444.17;A3:chr19:7534239-7534379:7534239-7534750:+	-0.114012	SF3B1_HOT	PNPLA6	NO	NA	NA
ENSG00000080546.13;AF:chr6:109002343-109009359:109009555:109002343-109093795:109094819:-	-0.349812	SF3B1_HOT	SESN1	NO	NA	NA
ENSG00000163138.19;AF:chr4:20696282:20696513-20704466:20700458:20700578-20704466:+	-0.35771	SF3B1_HOT	PACRGL	NO	NA	NA
ENSG00000221978.12;RI:chr1:1390766:1390865-1392790:1392803:-	-0.115935	SF3B1_HOT	CCNL2	NO	NA	NA
ENSG00000144840.10;SE:chr3:120690487-120694153:120694224-120698423:-	-0.166003	SF3B1_HOT	RABL3	NO	NA	NA
ENSG00000134419.15;AF:chr16:18789118-18789897:18790260:18789118-18790310:18790334:-	0.250046	SF3B1_HOT	RPS15A	NO	NA	NA
ENSG00000205352.11;AF:chr12:53441732:53441792-53442695:53441795:53442586-53442695:+	-0.514037	SF3B1_HOT	PRR13	NO	NA	NA
ENSG00000156313.15;SE:chrX:38276772-38279167:38279205-38287094:-	-0.149125	SF3B1_HOT	RPGR	NO	NA	NA
ENSG00000169241.19;A5:chr1:155135692-155136299:155135598-155136299:+	-0.188331	SF3B1_HOT	SLC50A1	NO	NA	NA
ENSG00000197694.18;SE:chr9:128591625-128592983:128593042-128594175:+	-0.364383	SF3B1_HOT	SPTAN1	NO	NA	NA
ENSG00000168010.11;RI:chr11:72822478:72822543-72822848:72824842:+	-0.152908	SF3B1_HOT	ATG16L2	NO	NA	NA
ENSG00000104973.19;AL:chr19:49836406-49836847:49836979:49836406-49838580:49840383:+	0.237937	SF3B1_HOT	MED25	NO	NA	NA
ENSG00000177943.14;SE:chr9:136858097-136858186:136858276-136858400:+	-0.103648	SF3B1_HOT	MAMDC4	NO	NA	NA
ENSG00000077463.15;RI:chr19:4175028:4175760-4175842:4175937:-	-0.231221	SF3B1_HOT	SIRT6	NO	NA	NA
ENSG00000120992.18;AF:chr8:54100939-54101350:54101554:54100939-54101755:54101849:-	0.426798	SF3B1_HOT	LYPLA1	NO	NA	NA
ENSG00000141002.20;AF:chr16:89908966:89909107-89910591:89910293:89910356-89910591:+	0.155149	SF3B1_HOT	TCF25	NO	NA	NA
ENSG00000175756.13;A5:chr1:1374790-1374997:1374790-1375154:-	0.126452	SF3B1_HOT	AURKAIP1	NO	NA	NA
ENSG00000116459.11;A3:chr1:111449873-111456086:111449873-111456227:+	0.12487	SF3B1_HOT	ATP5PB	NO	NA	NA
ENSG00000148180.20;SE:chr9:121231303-121248276:121248323-121265154:+	-0.26424	SF3B1_HOT	GSN	NO	NA	NA
ENSG00000119640.9;AF:chr14:75063561-75063954:75064020:75063561-75069210:75069483:-	-0.210404	SF3B1_HOT	ACYP1	NO	NA	NA
ENSG00000099326.9;AF:chr19:58571429-58572550:58572775:58571429-58573373:58573575:-	0.194996	SF3B1_HOT	MZF1	NO	NA	NA
ENSG00000196352.16;AL:chr1:207339417-207340391:207340766:207339417-207359546:207360502:+	0.17289	SF3B1_HOT	CD55	NO	NA	NA
ENSG00000072756.17;A3:chr3:3144710-3146416:3144710-3146430:+	-0.166276	SF3B1_HOT	TRNT1	NO	NA	NA
ENSG00000147471.12;AL:chr8:37766355-37766482:37766716:37766355-37772755:37772866:+	0.251115	SF3B1_HOT	PLPBP	NO	NA	NA
ENSG00000099849.15;RI:chr11:563189:563317-563396:563478:+	0.285173	SF3B1_HOT	RASSF7	NO	NA	NA
ENSG00000169398.19;SE:chr8:140668424-140669727:140669735-140674298:-	-0.488032	SF3B1_HOT	PTK2	NO	NA	NA
ENSG00000071051.14;SE:chr2:105855289-105881328:105882049-105892982:+	0.12645	SF3B1_HOT	NCK2	NO	NA	NA
ENSG00000148444.16;AF:chr10:22316420:22316556-22317884:22316735:22316967-22317884:+	0.211423	SF3B1_HOT	COMMD3	NO	NA	NA
ENSG00000071462.12;MX:chr7:73686900-73686999:73687095-73692596:73686900-73690916:73691012-73692596:+	0.342494	SF3B1_HOT	BUD23	NO	NA	NA
ENSG00000180879.14;RI:chrX:153798071:153798136-153798329:153798493:+	-0.188451	SF3B1_HOT	SSR4	NO	NA	NA
ENSG00000095397.16;AF:chr9:114478771-114503107:114503173:114478771-114504184:114505473:-	0.435066	SF3B1_HOT	WHRN	NO	NA	NA
ENSG00000115677.17;AF:chr2:241268541-241272761:241272863:241268541-241315570:241315702:-	0.506914	SF3B1_HOT	HDLBP	NO	NA	NA
ENSG00000234072.1;AF:chr2:27356246:27356856-27357808:27357140:27357292-27357808:+	-0.134146	SF3B1_HOT	AC074117.1	NO	NA	NA
ENSG00000132879.14;AF:chr1:11654375:11654581-11655806:11654881:11654952-11655806:+	-0.34272	SF3B1_HOT	FBXO44	NO	NA	NA
ENSG00000128739.23;A3:chr15:24968082-24974387:24968082-24974398:+	-0.492813	SF3B1_HOT	SNRPN	NO	NA	NA
ENSG00000104325.7;AF:chr8:90001476:90001561-90018909:90016734:90017326-90018909:+	0.60905	SF3B1_HOT	DECR1	NO	NA	NA
ENSG00000160991.16;A3:chr7:102433661-102436202:102433661-102436225:+	-0.235409	SF3B1_HOT	ORAI2	NO	NA	NA
ENSG00000108298.11;A3:chr17:39200349-39201213:39200349-39201222:+	0.124567	SF3B1_HOT	RPL19	NO	NA	NA
ENSG00000167635.11;A5:chr19:36215196-36228748:36215155-36228748:+	0.100153	SF3B1_HOT	ZNF146	NO	NA	NA
ENSG00000125347.14;AF:chr5:132489483-132490050:132490262:132489483-132490545:132490754:-	0.142968	BRAF	IRF1	YES	NA	NA
ENSG00000120526.11;AF:chr8:109322463-109329805:109329934:109322463-109333893:109334087:-	-0.115369	BRAF	NUDCD1	NO	NA	NA
ENSG00000162704.16;A3:chr1:183633163-183635517:183633154-183635517:-	0.108627	BRAF	ARPC5	NO	NA	NA
ENSG00000127922.9;AL:chr7:96622562:96622643-96694798:96687951:96688966-96694798:-	0.174963	BRAF	SEM1	NO	NA	NA
ENSG00000117616.18;AL:chr1:25246577:25247029-25267740:25253114:25253937-25267740:-	0.109751	BRAF	RSRP1	NO	NA	NA
ENSG00000156709.15;SE:chrX:130149568-130155156:130155286-130165551:-	0.117598	BRAF	AIFM1	NO	NA	NA
ENSG00000142208.16;A5:chr14:104792722-104793127:104792722-104794119:-	-0.108325	BRAF	AKT1	NO	NA	NA
ENSG00000079805.17;AL:chr19:10830378-10830978:10831884:10830378-10832304:10833484:+	0.146738	BRAF	DNM2	NO	NA	NA
ENSG00000127922.9;AL:chr7:96622562:96622643-96694798:96688769:96688966-96694798:-	0.21252	BRAF	SEM1	NO	NA	NA
ENSG00000167315.18;AF:chr18:49802853-49813469:49813533:49802853-49813682:49813953:-	-0.123649	BRAF	ACAA2	NO	NA	NA
ENSG00000123352.18;AL:chr12:49461037-49462275:49463625:49461037-49484590:49484673:+	-0.112952	BRAF	SPATS2	NO	NA	NA
ENSG00000165914.15;SE:chr14:90695578-90699158:90699223-90730075:-	-0.111921	BRAF	TTC7B	NO	NA	NA
ENSG00000121060.18;AF:chr17:56908563-56912759:56913117:56908563-56913392:56914080:-	0.102243	BRAF	TRIM25	NO	NA	NA
ENSG00000151702.17;AF:chr11:128692982:128693143-128758115:128694072:128694276-128758115:+	0.122825	BRAF	FLI1	NO	NA	NA
ENSG00000176148.16;AF:chr11:33039572:33039792-33043750:33040015:33040206-33043750:+	0.102425	BRAF	TCP11L1	NO	NA	NA
ENSG00000034677.13;A3:chr8:100303401-100309867:100303365-100309867:-	0.112518	BRAF	RNF19A	NO	NA	NA
ENSG00000125347.14;AF:chr5:132489483-132490050:132490262:132489483-132490545:132490773:-	0.10771	BRAF	IRF1	YES	NA	NA
ENSG00000198363.18;AF:chr8:61684188-61689673:61689849:61684188-61714269:61714587:-	0.162049	BRAF	ASPH	NO	NA	NA
ENSG00000197943.10;RI:chr16:81956695:81956847-81956849:81956879:+	-0.135484	BRAF	PLCG2	NO	NA	NA
ENSG00000100614.18;AF:chr14:60245752:60246046-60282684:60249221:60249677-60282684:+	-0.103576	BRAF	PPM1A	NO	NA	NA
ENSG00000015153.15;AL:chr12:42161699:42161765-42237599:42231224:42235997-42237599:-	0.155874	BRAF	YAF2	NO	NA	NA
ENSG00000100445.17;MX:chr14:24440926-24441674:24441795-24442346:24440926-24442178:24442260-24442346:-	-0.120977	BRAF	SDR39U1	NO	NA	NA
ENSG00000132470.14;SE:chr17:75752577-75753765:75753974-75754576:+	-0.117901	BRAF	ITGB4	NO	NA	NA
ENSG00000231721.7;AL:chr7:130938963:130941858-130945720:130944796:130944889-130945720:-	0.112522	NRAS	LINC-PINT	NO	NA	NA
ENSG00000111540.16;AF:chr12:55973913:55974000-55986869:55974078:55974139-55986869:+	0.146958	NRAS	RAB5B	NO	NA	NA
ENSG00000105810.10;AF:chr7:92833690-92833873:92833917:92833690-92836478:92836573:-	-0.114952	NRAS	CDK6	NO	NA	NA
ENSG00000196704.13;AL:chr17:68251178-68254404:68254562:68251178-68256814:68257153:+	0.128569	NRAS	AMZ2	NO	NA	NA
ENSG00000003402.20;AF:chr2:201118491:201118901-201129729:201129329:201129520-201129729:+	-0.114215	NRAS	CFLAR	NO	NA	NA
ENSG00000254986.7;A3:chr11:66480465-66482180:66480465-66482196:+	-0.140444	NRAS	DPP3	NO	NA	NA
ENSG00000175061.18;A5:chr17:16439060-16439327:16439029-16439327:+	0.104032	NRAS	SNHG29	NO	NA	NA
ENSG00000003402.20;AF:chr2:201118664:201118901-201129729:201129329:201129520-201129729:+	-0.144746	NRAS	CFLAR	NO	NA	NA
ENSG00000168283.14;AF:chr10:22322106:22322170-22326431:22325670:22325722-22326431:+	0.100547	NRAS	BMI1	NO	NA	NA
ENSG00000162843.17;SE:chr1:241780062-241783272:241783381-241787849:+	0.109153	NRAS	WDR64	NO	NA	NA
ENSG00000231721.7;AF:chr7:131052555-131088320:131088474:131052555-131107720:131107923:-	-0.112522	NRAS	LINC-PINT	NO	NA	NA
ENSG00000003402.20;AF:chr2:201116164:201116481-201129729:201129329:201129520-201129729:+	-0.138139	NRAS	CFLAR	NO	NA	NA
ENSG00000242086.8;AL:chr3:195699207-195701380:195701621:195699207-195708747:195708807:+	0.103838	NRAS	MUC20-OT1	NO	NA	NA
ENSG00000003402.20;AF:chr2:201116239:201116481-201129729:201129329:201129520-201129729:+	-0.130033	NRAS	CFLAR	NO	NA	NA
ENSG00000003402.20;AF:chr2:201122477:201122747-201129729:201129329:201129520-201129729:+	-0.106117	NRAS	CFLAR	NO	NA	NA
ENSG00000067208.14;SE:chr1:92636336-92663420:92663452-92665939:-	-0.10682	t414_DIS3	EVI5	NO	NA	NA
ENSG00000076108.11;SE:chr12:56615607-56617395:56617532-56630125:-	0.160962	t414_DIS3	BAZ2A	NO	NA	NA
ENSG00000187735.14;AF:chr8:54010492-54022063:54022265:54010492-54022266:54022448:-	-0.132086	t414_DIS3	TCEA1	NO	NA	NA
ENSG00000178149.17;AF:chr3:49018318-49018400:49018564:49018318-49020846:49021251:-	0.111379	t414_DIS3	DALRD3	NO	NA	NA
ENSG00000278540.5;AF:chr17:37339850-37358999:37359116:37339850-37406262:37406836:-	0.221779	t414_DIS3	ACACA	NO	NA	NA
ENSG00000112812.16;AF:chr6:27251071:27251264-27254986:27252986:27254872-27254986:+	-0.27707	t414_DIS3	PRSS16	NO	NA	NA
ENSG00000145979.18;AF:chr6:13326906-13327833:13328332:13326906-13328456:13328555:-	-0.13253	t414_DIS3	TBC1D7	NO	NA	NA
ENSG00000089094.19;A3:chr12:121443793-121444012:121443030-121444012:-	0.105307	t414_DIS3	KDM2B	NO	NA	NA
ENSG00000158019.21;AF:chr2:27889941:27890264-27892383:27890792:27890842-27892383:+	-0.180636	t414_DIS3	BABAM2	NO	NA	NA
ENSG00000205981.8;AF:chr3:180988229-180989332:180989518:180988229-180989600:180989736:-	-0.133275	t414_DIS3	DNAJC19	NO	NA	NA
ENSG00000151422.13;SE:chr5:108748000-108768093:108768238-108798124:+	0.212196	t414_DIS3	FER	NO	NA	NA
ENSG00000212694.8;AL:chr12:121795893:121796242-121799847:121799172:121799657-121799847:-	-0.292016	t414_DIS3	LINC01089	NO	NA	NA
ENSG00000009844.16;SE:chr6:142198615-142203985:142204065-142218498:+	0.132912	t414_DIS3	VTA1	NO	NA	NA
ENSG00000112679.14;AF:chr6:319952:320364-345854:337039:337187-345854:+	-0.12175	t414_DIS3	DUSP22	NO	NA	NA
ENSG00000129993.15;AF:chr16:88901656-88941020:88941198:88901656-88941771:88941809:-	-0.150882	t414_DIS3	CBFA2T3	NO	NA	NA
ENSG00000123815.12;AF:chr19:40714635-40715325:40715616:40714635-40716587:40716885:-	-0.198151	t414_DIS3	COQ8B	NO	NA	NA
ENSG00000096746.17;RI:chr10:68337199:68337333-68338503:68338687:+	-0.152127	t414_DIS3	HNRNPH3	NO	NA	NA
ENSG00000173744.17;SE:chr2:227536993-227550059:227550106-227551959:+	0.107262	t414_DIS3	AGFG1	NO	NA	NA
ENSG00000213928.9;RI:chr14:24164063:24164134-24164614:24164955:+	0.110627	t414_DIS3	IRF9	NO	NA	NA
ENSG00000183283.16;AL:chr12:51241116-51242330:51243931:51241116-51270718:51271362:+	0.228564	t414_DIS3	DAZAP2	NO	NA	NA
ENSG00000084676.15;SE:chr2:24762776-24768079:24768135-24768224:+	0.125249	t414_DIS3	NCOA1	NO	NA	NA
ENSG00000096746.17;A5:chr10:68332216-68337199:68331854-68337199:+	-0.152127	t414_DIS3	HNRNPH3	NO	NA	NA
ENSG00000144747.17;A5:chr3:69044595-69047349:69044595-69047358:-	0.141395	t414_DIS3	TMF1	NO	NA	NA
ENSG00000105323.17;AF:chr19:41262662:41263016-41268223:41265122:41265343-41268223:+	-0.178283	t414_DIS3	HNRNPUL1	NO	NA	NA
ENSG00000117394.24;RI:chr1:42929210:42929314-42929593:42929780:-	0.106268	t414_DIS3	SLC2A1	NO	NA	NA
ENSG00000227354.7;SE:chr13:79412907-79415111:79415364-79417835:+	0.198744	t414_DIS3	RBM26-AS1	NO	NA	NA
ENSG00000111364.16;RI:chr12:123607432:123607662-123608680:123608829:+	0.118217	t414_DIS3	DDX55	NO	NA	NA
ENSG00000005893.16;AL:chrX:120427827:120428626-120441730:120436494:120439293-120441730:-	0.158891	t414_DIS3	LAMP2	NO	NA	NA
ENSG00000052723.12;A5:chr1:114779284-114780110:114779284-114780449:-	0.110903	t414_DIS3	SIKE1	NO	NA	NA
ENSG00000074657.14;AF:chr18:58862600:58863166-58865304:58863604:58863750-58865304:+	-0.268188	t414_DIS3	ZNF532	NO	NA	NA
ENSG00000134453.16;AF:chr10:6089054:6089193-6101271:6096910:6097188-6101271:+	-0.111559	t414_DIS3	RBM17	NO	NA	NA
ENSG00000121274.13;A5:chr16:50223400-50224657:50223387-50224657:+	0.117125	t414_DIS3	TENT4B	NO	NA	NA
ENSG00000156482.11;AF:chr8:98045399-98045508:98045548:98045399-98045715:98046469:-	0.218318	t414_DIS3	RPL30	NO	NA	NA
ENSG00000092096.17;AL:chr14:23348627:23349426-23351752:23350919:23351672-23351752:-	0.116584	t414_DIS3	SLC22A17	NO	NA	NA
ENSG00000164022.17;AF:chr4:106315696:106316344-106324985:106316555:106316809-106324985:+	-0.171301	t414_DIS3	AIMP1	NO	NA	NA
ENSG00000148444.16;AF:chr10:22316409:22316556-22317884:22316735:22316967-22317884:+	0.156855	t414_DIS3	COMMD3	NO	NA	NA
ENSG00000117713.20;A3:chr1:26772632-26772812:26772632-26772815:+	-0.153669	t414_DIS3	ARID1A	YES	NA	NA
ENSG00000176731.12;SE:chr8:85217502-85219323:85219363-85220306:-	-0.104779	t414_DIS3	RBIS	NO	NA	NA
ENSG00000154723.12;AF:chr21:25729801-25734939:25735033:25729801-25735487:25735639:-	-0.166397	t414_DIS3	ATP5PF	NO	NA	NA
ENSG00000112851.14;SE:chr5:66054951-66075024:66075230-66076316:+	0.183835	t414_DIS3	ERBIN	NO	NA	NA
ENSG00000228801.6;AL:chr8:51899846-51911420:51911729:51899846-51946436:51949870:+	0.127726	t414_DIS3	AC064807.1	NO	NA	NA
ENSG00000141027.21;A3:chr17:16065694-16067894:16065691-16067894:-	0.106227	t414_DIS3	NCOR1	YES	NA	NA
ENSG00000111679.17;AL:chr12:6952177-6953342:6953601:6952177-6954805:6954847:+	-0.213947	t414_DIS3	PTPN6	NO	NA	NA
ENSG00000222011.9;A5:chr7:102749658-102751692:102749417-102751692:+	-0.16189	t414_DIS3	FAM185A	NO	NA	NA
ENSG00000167965.18;A3:chr16:2205875-2206031:2205875-2206061:+	-0.188672	t414_DIS3	MLST8	NO	NA	NA
ENSG00000140443.15;A3:chr15:98924684-98929558:98924684-98929561:+	0.125115	t414_DIS3	IGF1R	NO	NA	NA
ENSG00000158985.13;AF:chr5:131263666:131263900-131315976:131264062:131264166-131315976:+	-0.234829	t414_DIS3	CDC42SE2	NO	NA	NA
ENSG00000112851.14;MX:chr5:66054951-66068877:66069020-66075024:66054951-66072169:66072291-66075024:+	0.161919	t414_DIS3	ERBIN	NO	NA	NA
ENSG00000166377.20;SE:chr18:79374101-79375394:79375426-79377247:+	-0.111181	t414_DIS3	ATP9B	NO	NA	NA
ENSG00000165671.21;AF:chr5:177133079:177133154-177135087:177134173:177134245-177135087:+	0.189674	t414_DIS3	NSD1	NO	NA	NA
ENSG00000173915.16;SE:chr10:103394394-103395746:103396032-103396409:-	-0.116795	t414_DIS3	ATP5MD	NO	NA	NA
ENSG00000109689.17;MX:chr4:27017984-27019400:27021068-27022519:27017984-27021494:27021612-27022519:+	-0.100892	t414_DIS3	STIM2	NO	NA	NA
ENSG00000230989.7;A3:chr16:83809425-83811421:83809425-83817786:+	0.204091	t414_DIS3	HSBP1	NO	NA	NA
ENSG00000134369.15;SE:chr1:201789792-201790554:201790577-201790689:+	0.111036	t414_DIS3	NAV1	NO	NA	NA
ENSG00000198843.13;A5:chr3:150603686-150622385:150603499-150622385:+	0.108667	t414_DIS3	SELENOT	NO	NA	NA
ENSG00000177707.11;AF:chr3:111070115:111070329-111112030:111072168:111072510-111112030:+	-0.121014	t414_DIS3	NECTIN3	NO	NA	NA
ENSG00000116584.20;AF:chr1:155969300-155978067:155978160:155969300-155978913:155979113:-	0.163916	t414_DIS3	ARHGEF2	NO	NA	NA
ENSG00000156795.8;SE:chr8:123441349-123448047:123448224-123467079:+	-0.108584	t414_DIS3	NTAQ1	NO	NA	NA
ENSG00000271858.5;AF:chr3:50366223:50366331-50367796:50367465:50367521-50367796:+	-0.150198	t414_DIS3	CYB561D2	NO	NA	NA
ENSG00000060642.11;A5:chr1:26788819-26790759:26788268-26790759:+	-0.151789	t414_DIS3	PIGV	NO	NA	NA
ENSG00000144843.11;A5:chr3:119580636-119582134:119579851-119582134:+	-0.182534	t414_DIS3	ADPRH	NO	NA	NA
ENSG00000213462.5;AL:chr7:64990356:64993414-65006541:65006084:65006322-65006541:-	0.126259	t414_DIS3	ERV3-1	NO	NA	NA
ENSG00000033170.17;AF:chr14:65410592:65411993-65455621:65412730:65413214-65455621:+	-0.102798	t414_DIS3	FUT8	NO	NA	NA
ENSG00000015153.15;AL:chr12:42161699:42161765-42237599:42231224:42235997-42237599:-	0.148949	t414_DIS3	YAF2	NO	NA	NA
ENSG00000138621.12;SE:chr15:75028453-75044386:75044514-75048553:+	0.113651	t414_DIS3	PPCDC	NO	NA	NA
ENSG00000033170.17;AF:chr14:65411874:65411993-65455621:65412730:65413214-65455621:+	0.206486	t414_DIS3	FUT8	NO	NA	NA
ENSG00000138757.14;SE:chr4:75662049-75724056:75724176-75724276:-	-0.220457	t414_DIS3	G3BP2	NO	NA	NA
ENSG00000122008.15;AF:chr5:75511845:75511914-75552472:75547023:75547157-75552472:+	0.139303	t414_DIS3	POLK	NO	NA	NA
ENSG00000142252.11;AL:chr19:45080029-45088509:45088699:45080029-45090107:45091518:+	-0.132715	t414_DIS3	GEMIN7	NO	NA	NA
ENSG00000111679.17;AL:chr12:6952177-6953342:6953601:6952177-6954805:6954915:+	-0.121389	t414_DIS3	PTPN6	NO	NA	NA
ENSG00000102984.15;AF:chr16:71883273-71883908:71884153:71883273-71894889:71895336:-	0.195568	t414_DIS3	ZNF821	NO	NA	NA
ENSG00000123552.18;AL:chr6:99445962:99446463-99464604:99462464:99462815-99464604:-	0.115681	t414_DIS3	USP45	NO	NA	NA
ENSG00000133063.16;SE:chr1:203222325-203223135:203223259-203223495:-	0.279047	t414_DIS3	CHIT1	NO	NA	NA
ENSG00000101040.19;AF:chr20:47347926-47356380:47356414:47347926-47356657:47356889:-	0.118938	t414_DIS3	ZMYND8	NO	NA	NA
ENSG00000109065.12;AL:chr17:74772275:74772395-74772896:74772442:74772576-74772896:-	-0.103252	t414_DIS3	NAT9	NO	NA	NA
ENSG00000198363.18;AF:chr8:61684188-61689673:61689786:61684188-61714269:61714587:-	-0.123097	t414_DIS3	ASPH	NO	NA	NA
ENSG00000166971.17;AF:chr16:53500329-53501106:53501488:53500329-53503147:53503206:-	-0.159124	t414_DIS3	AKTIP	NO	NA	NA
ENSG00000136104.21;AF:chr13:50909747:50910140-50927407:50910274:50913131-50927407:+	0.124116	t414_DIS3	RNASEH2B	NO	NA	NA
ENSG00000140983.14;RI:chr16:668353:668411-668488:668699:+	-0.105915	t414_DIS3	RHOT2	NO	NA	NA
ENSG00000179335.18;SE:chr15:74620225-74622120:74622216-74622494:+	-0.10267	t414_DIS3	CLK3	NO	NA	NA
ENSG00000162869.16;AF:chr2:48440769:48441010-48451008:48441129:48441470-48451008:+	0.15105	t414_DIS3	PPP1R21	NO	NA	NA
ENSG00000100983.12;AF:chr20:34951860-34954716:34955643:34951860-34955727:34955783:-	-0.108829	t414_DIS3	GSS	NO	NA	NA
ENSG00000072609.17;A3:chr12:132869834-132870724:132869798-132870724:-	0.127157	t414_DIS3	CHFR	NO	NA	NA
ENSG00000160991.16;AF:chr7:102433106:102433355-102436225:102433575:102433661-102436225:+	-0.282386	t414_DIS3	ORAI2	NO	NA	NA
ENSG00000269893.8;SE:chr4:118278792-118278944:118279137-118279389:+	0.125458	t414_DIS3	SNHG8	NO	NA	NA
ENSG00000179818.14;SE:chr2:70053792-70055656:70055910-70059643:-	0.17213	t414_DIS3	PCBP1-AS1	NO	NA	NA
ENSG00000125534.10;A3:chr20:63520894-63521284:63520894-63521512:+	-0.131923	t414_DIS3	PPDPF	NO	NA	NA
ENSG00000204628.12;AF:chr5:181242345-181243692:181243914:181242345-181247124:181247576:-	0.176276	t414_DIS3	RACK1	NO	NA	NA
ENSG00000140264.20;AL:chr15:43793083-43793576:43794444:43793083-43799619:43800279:+	-0.131241	t414_DIS3	SERF2	NO	NA	NA
ENSG00000198860.13;AL:chr1:184054863-184072157:184074127:184054863-184093625:184095617:+	-0.123498	t414_DIS3	TSEN15	NO	NA	NA
ENSG00000242485.6;AL:chr1:1405109:1405886-1406909:1406249:1406346-1406909:-	0.127681	t414_DIS3	MRPL20	NO	NA	NA
ENSG00000123240.17;AF:chr10:13099603:13099958-13108138:13100173:13100302-13108138:+	0.266383	t414_DIS3	OPTN	NO	NA	NA
ENSG00000163902.12;AF:chr3:128644983-128650540:128650821:128644983-128680754:128681075:-	0.187709	t414_DIS3	RPN1	NO	NA	NA
ENSG00000141027.21;A3:chr17:16034944-16039433:16034941-16039433:-	0.103145	t414_DIS3	NCOR1	YES	NA	NA
ENSG00000197182.14;A3:chr22:46109353-46109671:46109353-46109764:+	-0.188687	t414_DIS3	MIRLET7BHG	NO	NA	NA
ENSG00000156110.14;AF:chr10:74151240:74151343-74200764:74176551:74176886-74200764:+	0.206244	t414_DIS3	ADK	NO	NA	NA
ENSG00000105223.20;SE:chr19:40348768-40365553:40365930-40366419:+	-0.147957	t414_DIS3	PLD3	NO	NA	NA
ENSG00000090097.21;AF:chr3:51961304-51962810:51962892:51961304-51967326:51967457:-	0.171617	t414_DIS3	PCBP4	NO	NA	NA
ENSG00000172780.17;AF:chr3:129121492-129121899:129121922:129121492-129122490:129122801:-	0.155073	t414_DIS3	RAB43	NO	NA	NA
ENSG00000131473.17;AF:chr17:41913900-41918880:41919022:41913900-41930358:41930542:-	0.202938	t414_DIS3	ACLY	NO	NA	NA
ENSG00000160688.19;A5:chr1:154992786-154992902:154992673-154992902:+	0.119356	t414_DIS3	FLAD1	NO	NA	NA
ENSG00000128335.14;SE:chr22:36233455-36237061:36237185-36239441:-	0.130905	t414_DIS3	APOL2	NO	NA	NA
ENSG00000185650.10;AF:chr14:68790492-68790983:68791243:68790492-68792882:68794736:-	0.126889	t414_DIS3	ZFP36L1	YES	NA	NA
ENSG00000239900.13;A5:chr22:40361677-40362981:40361666-40362981:+	-0.149667	t414_DIS3	ADSL	NO	NA	NA
ENSG00000228863.8;AL:chr1:160685101-160686609:160686692:160685101-160698955:160699761:+	-0.110789	t414_DIS3	AL121985.1	NO	NA	NA
ENSG00000117616.18;A3:chr1:25244224-25244454:25243633-25244454:-	-0.164795	t414_DIS3	RSRP1	NO	NA	NA
ENSG00000072310.17;SE:chr17:17820521-17823518:17823607-17836727:-	-0.181641	t414_DIS3	SREBF1	NO	NA	NA
ENSG00000128581.17;SE:chr7:101318213-101318956:101319032-101321671:-	-0.160234	t414_DIS3	IFT22	NO	NA	NA
ENSG00000235703.6;AF:chrX:149938624:149938786-149940659:149939739:149940111-149940659:+	0.199686	t414_DIS3	LINC00894	NO	NA	NA
ENSG00000171853.16;AL:chr2:3478933-3479219:3479567:3478933-3484720:3485094:+	0.101539	t414_DIS3	TRAPPC12	NO	NA	NA
ENSG00000214706.10;RI:chr3:50290170:50290294-50290560:50290679:-	0.110581	t414_DIS3	IFRD2	NO	NA	NA
ENSG00000259448.3;AL:chr15:31216037-31219289:31220945:31216037-31223995:31224445:+	-0.116184	t414_DIS3	LINC02352	NO	NA	NA
ENSG00000172992.12;A3:chr17:45035002-45060888:45034999-45060888:-	-0.215979	t414_DIS3	DCAKD	NO	NA	NA
ENSG00000101246.20;SE:chr20:63700702-63701830:63701898-63702136:-	0.114633	t414_DIS3	ARFRP1	NO	NA	NA
ENSG00000212694.8;SE:chr12:121801808-121802631:121802784-121802879:-	-0.263258	t414_DIS3	LINC01089	NO	NA	NA
ENSG00000181991.16;A3:chr15:88468024-88472236:88468024-88472355:+	-0.135665	t414_DIS3	MRPS11	NO	NA	NA
ENSG00000158710.15;AF:chr1:159920537-159925019:159925229:159920537-159925450:159925491:-	-0.10675	t414_DIS3	TAGLN2	NO	NA	NA
ENSG00000135365.16;A3:chr11:45969904-45971116:45969901-45971116:-	-0.119507	t414_DIS3	PHF21A	NO	NA	NA
ENSG00000100031.19;AF:chr22:24603213:24603321-24607954:24607639:24607732-24607954:+	-0.193682	t414_DIS3	GGT1	NO	NA	NA
ENSG00000133460.19;AF:chr22:23856957:23856991-23862104:23857000:23857531-23862104:+	0.108608	t414_DIS3	SLC2A11	NO	NA	NA
ENSG00000153048.11;AF:chr16:8859335-8867707:8867887:8859335-8868966:8869006:-	-0.160564	t414_DIS3	CARHSP1	NO	NA	NA
ENSG00000110200.8;AF:chr11:72111496-72111924:72112232:72111496-72112650:72112774:-	-0.116621	t414_DIS3	ANAPC15	NO	NA	NA
ENSG00000179818.14;AF:chr2:70085624-70085816:70086484:70085624-70086978:70087015:-	-0.188207	t414_DIS3	PCBP1-AS1	NO	NA	NA
ENSG00000093010.14;AL:chr22:19964299-19967164:19967694:19964299-19968536:19968958:+	0.135372	t414_DIS3	COMT	NO	NA	NA
ENSG00000170469.10;A3:chr5:139396955-139397041:139396929-139397041:-	-0.138126	t414_DIS3	SPATA24	NO	NA	NA
ENSG00000102226.10;AF:chrX:47233009:47233219-47239070:47233392:47233533-47239070:+	0.262627	t414_DIS3	USP11	NO	NA	NA
ENSG00000183281.14;AF:chr2:87017688-87017953:87017985:87017688-87021735:87021852:-	0.120849	t414_DIS3	PLGLB1	NO	NA	NA
ENSG00000173264.14;AF:chr11:64270062:64270661-64286510:64285859:64286134-64286510:+	-0.146923	t414_DIS3	GPR137	NO	NA	NA
ENSG00000172765.17;AF:chr3:129880559-129892573:129892745:129880559-129893182:129893419:-	0.107551	t414_DIS3	TMCC1	NO	NA	NA
ENSG00000116871.15;AF:chr1:36155579:36155733-36170971:36156202:36156463-36170971:+	-0.247548	t414_DIS3	MAP7D1	NO	NA	NA
ENSG00000118482.12;SE:chr6:63646795-63678828:63679020-63680000:+	-0.227345	t414_DIS3	PHF3	NO	NA	NA
ENSG00000148444.16;AF:chr10:22316441:22316556-22317884:22316735:22316967-22317884:+	0.192131	t414_DIS3	COMMD3	NO	NA	NA
ENSG00000187735.14;AF:chr8:54010492-54022063:54022159:54010492-54022266:54022448:-	-0.163652	t414_DIS3	TCEA1	NO	NA	NA
ENSG00000179818.14;A5:chr2:70053792-70055656:70053792-70055714:-	0.103743	t414_DIS3	PCBP1-AS1	NO	NA	NA
ENSG00000110200.8;AL:chr11:72106378:72107605-72110088:72109802:72109928-72110088:-	0.169387	t414_DIS3	ANAPC15	NO	NA	NA
ENSG00000129187.14;SE:chr4:182915575-182916419:182916539-182916673:-	-0.114423	t414_DIS3	DCTD	NO	NA	NA
ENSG00000141499.17;A3:chr17:7700829-7701427:7700829-7701459:+	0.15739	t414_DIS3	WRAP53	NO	NA	NA
ENSG00000115415.20;AF:chr2:191013678-191014018:191014197:191013678-191020758:191020960:-	0.121944	t414_DIS3	STAT1	NO	NA	NA
ENSG00000105287.12;A3:chr19:46716535-46716951:46716259-46716951:-	-0.171759	t414_DIS3	PRKD2	YES	NA	NA
ENSG00000175106.16;AF:chr17:15555364-15562193:15563428:15555364-15563437:15563544:-	-0.228324	t414_DIS3	TVP23C	NO	NA	NA
ENSG00000198715.13;AL:chr1:156290089:156290360-156292886:156290541:156291106-156292886:-	0.166289	t414_DIS3	GLMP	NO	NA	NA
ENSG00000198860.13;SE:chr1:184054863-184095031:184095092-184095690:+	0.145791	t414_DIS3	TSEN15	NO	NA	NA
ENSG00000177311.11;AF:chr3:141386446:141386937-141403927:141387812:141387887-141403927:+	-0.121448	t414_DIS3	ZBTB38	NO	NA	NA
ENSG00000167522.16;AL:chr16:89291728:89291777-89305206:89301324:89301636-89305206:-	-0.114977	t414_DIS3	ANKRD11	NO	NA	NA
ENSG00000014641.21;AF:chr2:63588609:63589046-63594488:63589151:63589384-63594488:+	0.14648	t414_DIS3	MDH1	NO	NA	NA
ENSG00000143190.23;SE:chr1:167220958-167241407:167241610-167332470:+	-0.159435	t414_DIS3	POU2F1	NO	NA	NA
ENSG00000196405.13;AF:chr14:99971449:99972057-100084687:100019382:100019687-100084687:+	-0.180557	t414_DIS3	EVL	NO	NA	NA
ENSG00000166839.17;SE:chr15:64917514-64919819:64919976-64921921:+	-0.194445	t414_DIS3	ANKDD1A	NO	NA	NA
ENSG00000102805.16;AL:chr13:76996127-77000458:77001331:76996127-77008744:77010968:+	0.249073	t414_DIS3	CLN5	NO	NA	NA
ENSG00000101040.19;AF:chr20:47347926-47356380:47356414:47347926-47356657:47356706:-	0.115763	t414_DIS3	ZMYND8	NO	NA	NA
ENSG00000163902.12;AF:chr3:128644983-128650540:128650820:128644983-128680754:128681075:-	0.16579	t414_DIS3	RPN1	NO	NA	NA
ENSG00000034533.12;AF:chr3:131025594-131026188:131026609:131025594-131026732:131026792:-	0.124135	t414_DIS3	ASTE1	NO	NA	NA
ENSG00000155957.18;AF:chr12:66153448-66168915:66169511:66153448-66169855:66169996:-	0.128419	t414_DIS3	TMBIM4	NO	NA	NA
ENSG00000198815.9;AF:chr1:42311110-42335059:42335235:42311110-42335626:42335877:-	0.163079	t414_DIS3	FOXJ3	NO	NA	NA
ENSG00000109971.14;AF:chr11:123061329-123062347:123062669:123061329-123062750:123063230:-	0.200102	t414_DIS3	HSPA8	NO	NA	NA
ENSG00000143458.12;SE:chr1:151070934-151073039:151073157-151088190:+	-0.146656	t414_DIS3	GABPB2	NO	NA	NA
ENSG00000138101.18;SE:chr2:25383889-25387289:25387378-25388202:-	-0.179692	t414_DIS3	DTNB	NO	NA	NA
ENSG00000248309.7;AF:chr5:88883328:88883485-88905209:88889445:88889480-88905209:+	-0.146947	t414_DIS3	MEF2C-AS1	NO	NA	NA
ENSG00000133195.11;AF:chr17:73088775-73089714:73089764:73088775-73092611:73092688:-	0.103988	t414_DIS3	SLC39A11	NO	NA	NA
ENSG00000142937.12;AF:chr1:44775251:44775473-44776034:44775578:44775600-44776034:+	-0.136656	t414_DIS3	RPS8	NO	NA	NA
ENSG00000212694.8;RI:chr12:121795267:121795726-121796191:121796242:-	0.241476	t414_DIS3	LINC01089	NO	NA	NA
ENSG00000119242.8;AL:chr12:123922922:123924288-123942744:123936417:123937830-123942744:-	-0.184953	t414_DIS3	CCDC92	NO	NA	NA
ENSG00000198794.12;AL:chr15:75012805-75016593:75016749:75012805-75017870:75017946:+	0.246796	t414_DIS3	SCAMP5	NO	NA	NA
ENSG00000231507.2;AF:chr1:203282421:203282556-203287989:203287770:203287831-203287989:+	0.11963	t414_DIS3	LINC01353	NO	NA	NA
ENSG00000134982.17;AF:chr5:112707521:112707882-112754873:112737885:112737925-112754873:+	0.121951	t414_DIS3	APC	NO	NA	NA
ENSG00000111481.10;AF:chr12:54325109:54325181-54340547:54325584:54325682-54340547:+	0.120442	t414_DIS3	COPZ1	NO	NA	NA
ENSG00000104853.16;AF:chr19:44954591:44954701-44961963:44955380:44955467-44961963:+	0.113767	t414_DIS3	CLPTM1	NO	NA	NA
ENSG00000133943.20;A5:chr14:91115221-91157639:91114994-91157639:+	-0.318785	t414_DIS3	DGLUCY	NO	NA	NA
ENSG00000175984.15;SE:chr1:114618482-114621895:114622065-114622987:-	0.100426	t414_DIS3	DENND2C	NO	NA	NA
ENSG00000132781.19;AF:chr1:45334511-45339899:45339970:45334511-45340219:45340893:-	-0.173108	t414_DIS3	MUTYH	NO	NA	NA
ENSG00000161267.12;SE:chr3:197533561-197546361:197546486-197555781:-	-0.137922	t414_DIS3	BDH1	NO	NA	NA
ENSG00000134369.15;AF:chr1:201739317:201739844-201780421:201739868:201740076-201780421:+	-0.158818	t414_DIS3	NAV1	NO	NA	NA
ENSG00000111679.17;AF:chr12:6946577:6946739-6951609:6951435:6951520-6951609:+	0.301849	t414_DIS3	PTPN6	NO	NA	NA
ENSG00000142082.15;SE:chr11:233534-233911:234004-236616:-	0.14786	t414_DIS3	SIRT3	NO	NA	NA
ENSG00000117616.18;A3:chr1:25244224-25245150:25243633-25245150:-	0.159132	t414_DIS3	RSRP1	NO	NA	NA
ENSG00000205885.7;SE:chr12:7108947-7110064:7110147-7110298:+	0.142412	t414_DIS3	C1RL-AS1	NO	NA	NA
ENSG00000172349.17;A3:chr15:81290540-81291924:81290540-81292556:+	0.117443	t414_DIS3	IL16	NO	NA	NA
ENSG00000133943.20;A5:chr14:91114528-91157639:91114283-91157639:+	-0.170187	t414_DIS3	DGLUCY	NO	NA	NA
ENSG00000134905.17;SE:chr13:110647239-110650637:110651100-110663451:-	-0.149873	t414_DIS3	CARS2	NO	NA	NA
ENSG00000119487.17;SE:chr9:125657799-125669818:125669907-125706971:-	-0.123637	t414_DIS3	MAPKAP1	NO	NA	NA
ENSG00000177311.11;AL:chr3:141386937-141394200:141394457:141386937-141403927:141404006:+	0.176721	t414_DIS3	ZBTB38	NO	NA	NA
ENSG00000126088.14;A5:chr1:45013354-45013594:45013215-45013594:+	0.14666	t414_DIS3	UROD	NO	NA	NA
ENSG00000068305.17;AF:chr15:99565417:99565669-99598430:99565980:99566104-99598430:+	-0.136386	t414_DIS3	MEF2A	NO	NA	NA
ENSG00000161217.12;AF:chr3:196270541-196287615:196287690:196270541-196287764:196287957:-	0.196711	t414_DIS3	PCYT1A	NO	NA	NA
ENSG00000167112.10;SE:chr9:128315628-128315822:128315896-128317152:-	0.159208	t414_DIS3	TRUB2	NO	NA	NA
ENSG00000105971.15;AL:chr7:116499931-116500260:116501286:116499931-116505971:116506554:+	0.214742	t414_DIS3	CAV2	NO	NA	NA
ENSG00000228863.8;A3:chr1:160683695-160684955:160683695-160684983:+	-0.100665	t414_DIS3	AL121985.1	NO	NA	NA
ENSG00000156482.11;AF:chr8:98045399-98045508:98045550:98045399-98045715:98046469:-	0.142158	t414_DIS3	RPL30	NO	NA	NA
ENSG00000134684.11;SE:chr1:32806611-32810591:32810766-32817188:-	0.157528	t414_DIS3	YARS1	NO	NA	NA
ENSG00000093183.14;A3:chr3:42563980-42568865:42563880-42568865:-	-0.187896	t414_DIS3	SEC22C	NO	NA	NA
ENSG00000120992.18;AF:chr8:54100939-54101350:54101554:54100939-54101755:54101854:-	0.12096	t414_DIS3	LYPLA1	NO	NA	NA
ENSG00000231074.9;AL:chr6:30286703:30289494-30296132:30291006:30294964-30296132:-	-0.115553	t414_DIS3	HCG18	NO	NA	NA
ENSG00000259583.3;AL:chr15:100892343:100896066-100918804:100913203:100915980-100918804:-	0.184461	t414_DIS3	AC015712.2	NO	NA	NA
ENSG00000131848.9;AL:chr19:56224932:56225173-56313283:56263218:56263682-56313283:-	0.220724	t414_DIS3	ZSCAN5A	NO	NA	NA
ENSG00000226853.3;A5:chr2:174487827-174488035:174487529-174488035:+	-0.200924	t414_DIS3	AC010894.1	NO	NA	NA
ENSG00000111679.17;AF:chr12:6946577:6946739-6951609:6951285:6951520-6951609:+	0.259221	t414_DIS3	PTPN6	NO	NA	NA
ENSG00000188690.15;AL:chr10:125785517:125785839-125794880:125793858:125794388-125794880:-	-0.208969	t414_DIS3	UROS	NO	NA	NA
ENSG00000172936.16;SE:chr3:38139998-38140388:38140549-38140757:+	0.107157	t414_DIS3	MYD88	NO	NA	NA
ENSG00000204406.14;A5:chr2:148484135-148485742:148483436-148485742:+	-0.123411	t414_DIS3	MBD5	NO	NA	NA
ENSG00000182165.18;MX:chr7:87325444-87326263:87326449-87345043:87325444-87341523:87341684-87345043:-	-0.223116	t414_DIS3	TP53TG1	NO	NA	NA
ENSG00000198794.12;AF:chr15:74995584:74995673-75011792:74995967:74996259-75011792:+	0.156556	t414_DIS3	SCAMP5	NO	NA	NA
ENSG00000134684.11;SE:chr1:32810766-32810911:32811057-32817188:-	-0.114353	t414_DIS3	YARS1	NO	NA	NA
ENSG00000095794.19;AF:chr10:35126959:35127193-35148368:35127424:35127567-35148368:+	0.227463	t414_DIS3	CREM	NO	NA	NA
ENSG00000114738.11;AF:chr3:50611908:50612129-50612848:50612328:50612699-50612848:+	0.153331	t414_DIS3	MAPKAPK3	NO	NA	NA
ENSG00000155957.18;SE:chr12:66138166-66138724:66138734-66145841:-	0.185791	t414_DIS3	TMBIM4	NO	NA	NA
ENSG00000070614.15;AF:chr5:150485818:150486003-150520868:150497778:150497979-150520868:+	-0.118285	t414_DIS3	NDST1	NO	NA	NA
ENSG00000189339.12;AL:chr1:1659529:1660111-1668327:1661478:1666019-1668327:-	-0.143224	t414_DIS3	SLC35E2B	NO	NA	NA
ENSG00000148358.19;SE:chr9:130107539-130110370:130110426-130124915:+	0.117929	t414_DIS3	GPR107	NO	NA	NA
ENSG00000137713.16;SE:chr11:111752332-111753443:111753577-111754499:-	-0.1543	t414_DIS3	PPP2R1B	NO	NA	NA
ENSG00000112812.16;AF:chr6:27251071:27251264-27254986:27251588:27252040-27254986:+	-0.121059	t414_DIS3	PRSS16	NO	NA	NA
ENSG00000251669.6;AL:chr4:3942911:3943372-3948090:3947905:3948007-3948090:-	0.12964	t414_DIS3	FAM86EP	NO	NA	NA
ENSG00000090661.12;AF:chr19:8209431:8209494-8210706:8209634:8209948-8210706:+	0.158304	t414_DIS3	CERS4	NO	NA	NA
ENSG00000131446.17;AF:chr5:180809076-180809364:180809875:180809076-180810192:180810503:-	0.108986	t414_DIS3	MGAT1	NO	NA	NA
ENSG00000133943.20;AF:chr14:91114063:91114283-91157639:91114700:91115221-91157639:+	0.378861	t414_DIS3	DGLUCY	NO	NA	NA
ENSG00000003402.20;AF:chr2:201116239:201116481-201129729:201116837:201116967-201129729:+	0.133565	t414_DIS3	CFLAR	NO	NA	NA
ENSG00000105085.11;AF:chr19:16578409-16627872:16628204:16578409-16628522:16629062:-	0.18876	t414_DIS3	MED26	NO	NA	NA
ENSG00000105220.17;A5:chr19:34381598-34393248:34381519-34393248:+	0.154493	t414_DIS3	GPI	NO	NA	NA
ENSG00000204186.10;SE:chr2:206281909-206292014:206292116-206297246:+	0.125557	t414_DIS3	ZDBF2	NO	NA	NA
ENSG00000204569.10;SE:chr6:30609955-30614549:30614602-30616478:-	-0.271297	t414_DIS3	PPP1R10	NO	NA	NA
ENSG00000178096.9;A5:chr1:149899730-149899843:149899672-149899843:+	-0.137639	t414_DIS3	BOLA1	NO	NA	NA
ENSG00000002919.15;AF:chr17:48107549:48107596-48112031:48107766:48107838-48112031:+	0.106602	t414_DIS3	SNX11	NO	NA	NA
ENSG00000165775.18;SE:chrX:155046584-155047369:155047391-155051670:+	0.136494	t414_DIS3	FUNDC2	NO	NA	NA
ENSG00000102401.20;A5:chrX:101623430-101623786:101623276-101623786:+	0.14017	t414_DIS3	ARMCX3	NO	NA	NA
ENSG00000148444.16;AF:chr10:22316386:22316556-22317884:22316735:22316967-22317884:+	0.132066	t414_DIS3	COMMD3	NO	NA	NA
ENSG00000116977.19;AL:chr1:236544915-236545162:236545201:236544915-236548012:236552981:+	-0.113121	t414_DIS3	LGALS8	NO	NA	NA
ENSG00000137504.13;SE:chr11:85660597-85661637:85661749-85662389:-	-0.108467	t414_DIS3	CREBZF	NO	NA	NA
ENSG00000152147.11;SE:chr2:38779118-38779258:38779441-38781517:+	0.103856	t414_DIS3	GEMIN6	NO	NA	NA
ENSG00000160570.14;A5:chr19:42199829-42201989:42199829-42202051:-	-0.110706	t414_DIS3	DEDD2	NO	NA	NA
ENSG00000212694.8;A5:chr12:121801808-121802631:121801808-121802879:-	-0.227174	t414_DIS3	LINC01089	NO	NA	NA
ENSG00000107614.22;AF:chr10:17174660-17201281:17201428:17174660-17201571:17201657:-	-0.128259	t414_DIS3	TRDMT1	NO	NA	NA
ENSG00000174915.12;A3:chr11:450637-451352:450637-451385:+	0.20262	t414_DIS3	PTDSS2	NO	NA	NA
ENSG00000134982.17;SE:chr5:112737925-112738353:112738460-112754873:+	0.241606	t414_DIS3	APC	NO	NA	NA
ENSG00000160710.17;AF:chr1:154602626-154607992:154608186:154602626-154627855:154627968:-	-0.149513	t414_DIS3	ADAR	NO	NA	NA
ENSG00000273061.1;AL:chr9:4676600:4676749-4679387:4678819:4679165-4679387:-	0.141475	t414_DIS3	CDC37L1-DT	NO	NA	NA
ENSG00000255339.6;SE:chr10:100516960-100526399:100526554-100526975:-	0.129614	t414_DIS3	AL133352.1	NO	NA	NA
ENSG00000103496.15;AF:chr16:31033095:31033522-31034013:31033557:31033835-31034013:+	-0.272347	t414_DIS3	STX4	NO	NA	NA
ENSG00000010818.10;AF:chr6:142837047-142944801:142945031:142837047-142945944:142946365:-	0.106878	t414_DIS3	HIVEP2	NO	NA	NA
ENSG00000101040.19;AF:chr20:47347926-47351710:47351877:47347926-47356380:47356414:-	-0.271798	t414_DIS3	ZMYND8	NO	NA	NA
ENSG00000102316.17;AF:chrX:54807747:54807802-54809303:54808371:54808433-54809303:+	0.108443	t414_DIS3	MAGED2	NO	NA	NA
ENSG00000126581.13;MX:chr17:42810928-42811655:42811797-42814524:42810928-42813948:42814008-42814524:-	-0.146852	t414_DIS3	BECN1	NO	NA	NA
ENSG00000188690.15;AL:chr10:125788590:125789005-125794880:125791520:125794388-125794880:-	-0.106628	t414_DIS3	UROS	NO	NA	NA
ENSG00000165819.12;A3:chr14:21510980-21511124:21510913-21511124:-	0.101718	t414_DIS3	METTL3	NO	NA	NA
ENSG00000074657.14;AF:chr18:58863483:58863750-58865470:58864821:58864986-58865470:+	-0.134483	t414_DIS3	ZNF532	NO	NA	NA
ENSG00000123609.11;AL:chr2:151277255:151278990-151282868:151282039:151282043-151282868:-	0.145278	t414_DIS3	NMI	NO	NA	NA
ENSG00000173264.14;AF:chr11:64270062:64270661-64286510:64284811:64285262-64286510:+	-0.140212	t414_DIS3	GPR137	NO	NA	NA
ENSG00000134077.16;A5:chr3:9363728-9365016:9363127-9365016:+	0.146847	t414_DIS3	THUMPD3	NO	NA	NA
ENSG00000117616.18;SE:chr1:25244224-25244454:25244498-25245150:-	-0.230943	t414_DIS3	RSRP1	NO	NA	NA
ENSG00000182093.16;A5:chr21:39391476-39391769:39390919-39391769:+	0.106146	t414_DIS3	GET1	NO	NA	NA
ENSG00000186106.11;A5:chr8:100533311-100559038:100533311-100559532:-	0.154375	t414_DIS3	ANKRD46	NO	NA	NA
ENSG00000159322.17;SE:chr15:72752895-72755556:72755654-72760407:-	-0.112257	t414_DIS3	ADPGK	NO	NA	NA
ENSG00000136104.21;AF:chr13:50909813:50910140-50927407:50910274:50913131-50927407:+	0.129989	t414_DIS3	RNASEH2B	NO	NA	NA
ENSG00000175197.12;A3:chr12:57517595-57517706:57517424-57517706:-	0.161798	t414_DIS3	DDIT3	NO	NA	NA
ENSG00000185920.16;AF:chr9:95506599-95507229:95507417:95506599-95508161:95509266:-	0.262458	t414_DIS3	PTCH1	NO	NA	NA
ENSG00000177311.11;AF:chr3:141386446:141386937-141403927:141402349:141402449-141403927:+	-0.153353	t414_DIS3	ZBTB38	NO	NA	NA
ENSG00000010818.10;AF:chr6:142837047-142945099:142945176:142837047-142945944:142946365:-	0.271667	t414_DIS3	HIVEP2	NO	NA	NA
ENSG00000170113.16;AF:chr15:22785899:22786248-22810749:22786813:22786834-22810749:+	-0.139072	t414_DIS3	NIPA1	NO	NA	NA
ENSG00000262454.4;AF:chr16:14301389:14301531-14326013:14302288:14302597-14326013:+	-0.159342	t414_DIS3	MIR193BHG	NO	NA	NA
ENSG00000185088.14;AF:chr15:63156521-63156787:63157281:63156521-63157400:63157477:-	0.149718	t414_DIS3	RPS27L	NO	NA	NA
ENSG00000125962.14;SE:chrX:102599847-102600920:102601032-102601464:+	-0.130515	t414_DIS3	ARMCX5	NO	NA	NA
ENSG00000214367.8;SE:chr4:2241093-2241520:2241790-2242051:-	0.260785	t414_DIS3	HAUS3	NO	NA	NA
ENSG00000156587.16;AF:chr11:57560432-57567027:57567326:57560432-57567849:57568284:-	-0.226195	t414_DIS3	UBE2L6	NO	NA	NA
ENSG00000179222.18;SE:chrX:51893755-51894276:51894349-51895053:+	-0.159264	t414_DIS3	MAGED1	NO	NA	NA
ENSG00000238227.8;AF:chr9:136117024-136118072:136118431:136117024-136118485:136118534:-	-0.16395	t414_DIS3	TMEM250	NO	NA	NA
ENSG00000148444.16;AF:chr10:22316429:22316556-22317884:22316735:22316967-22317884:+	0.20099	t414_DIS3	COMMD3	NO	NA	NA
ENSG00000204186.10;A3:chr2:206281909-206292011:206281909-206292014:+	-0.157224	t414_DIS3	ZDBF2	NO	NA	NA
ENSG00000122068.13;AF:chr3:197737179:197737268-197756426:197750390:197750822-197756426:+	-0.160493	t414_DIS3	FYTTD1	NO	NA	NA
ENSG00000105085.11;AF:chr19:16578409-16627872:16628173:16578409-16628522:16629062:-	0.118608	t414_DIS3	MED26	NO	NA	NA
ENSG00000135297.16;AF:chr6:73461578:73462071-73466209:73462143:73462322-73466209:+	0.145963	t414_DIS3	MTO1	NO	NA	NA
ENSG00000196950.14;AF:chr2:195657226:195657281-195680032:195657449:195657609-195680032:+	0.215736	t414_DIS3	SLC39A10	NO	NA	NA
ENSG00000156482.11;AF:chr8:98045399-98045508:98045546:98045399-98045715:98046469:-	0.249196	t414_DIS3	RPL30	NO	NA	NA
ENSG00000065150.21;SE:chr13:97969830-97975891:97975997-97976693:+	0.134981	t414_DIS3	IPO5	NO	NA	NA
ENSG00000023572.10;AF:chr1:193101204-193105264:193105433:193101204-193105517:193106114:-	0.159591	t414_DIS3	GLRX2	NO	NA	NA
ENSG00000203666.12;AL:chr1:245083688-245091027:245091806:245083688-245121920:245127164:+	-0.101614	t414_DIS3	EFCAB2	NO	NA	NA
ENSG00000102226.10;AF:chrX:47233009:47233219-47239070:47233772:47233912-47239070:+	0.268884	t414_DIS3	USP11	NO	NA	NA
ENSG00000082438.17;SE:chr2:164722522-164727106:164727144-164727969:-	0.174813	t414_DIS3	COBLL1	NO	NA	NA
ENSG00000133460.19;AF:chr22:23856934:23856991-23862104:23857000:23857531-23862104:+	0.16793	t414_DIS3	SLC2A11	NO	NA	NA
ENSG00000133063.16;SE:chr1:203228562-203230015:203230084-203240463:-	0.342083	t414_DIS3	CHIT1	NO	NA	NA
ENSG00000236104.3;AF:chr6:33316985-33317653:33317744:33316985-33317878:33317942:-	0.156817	t414_DIS3	ZBTB22	NO	NA	NA
ENSG00000227354.7;SE:chr13:79412907-79415262:79415364-79417835:+	0.231072	t414_DIS3	RBM26-AS1	NO	NA	NA
ENSG00000166839.17;SE:chr15:64911964-64914033:64914130-64915797:+	-0.138721	t414_DIS3	ANKDD1A	NO	NA	NA
ENSG00000182473.22;A3:chr17:76090481-76091143:76090397-76091143:-	0.117357	t414_DIS3	EXOC7	NO	NA	NA
ENSG00000074657.14;AF:chr18:58862600:58863166-58865304:58864091:58864235-58865304:+	-0.250138	t414_DIS3	ZNF532	NO	NA	NA
ENSG00000242516.2;SE:chr3:75673238-75673847:75674006-75675764:+	0.127882	t414_DIS3	LINC00960	NO	NA	NA
ENSG00000123352.18;AL:chr12:49461037-49462275:49463625:49461037-49484590:49484673:+	-0.175054	t414_DIS3	SPATS2	NO	NA	NA
ENSG00000073584.20;RI:chr17:40631592:40631693-40635931:40636102:-	0.19977	t414_DIS3	SMARCE1	NO	NA	NA
ENSG00000167522.16;AF:chr16:89418368-89489038:89489193:89418368-89490245:89490319:-	-0.132155	t414_DIS3	ANKRD11	NO	NA	NA
ENSG00000116871.15;AF:chr1:36155579:36155733-36170971:36156198:36156463-36170971:+	-0.157974	t414_DIS3	MAP7D1	NO	NA	NA
ENSG00000147889.17;AF:chr9:21971208-21994139:21994624:21971208-21994821:21995301:-	0.188594	t414_DIS3	CDKN2A	NO	NA	NA
ENSG00000072849.11;AF:chr17:5485216-5486069:5486175:5485216-5486384:5486811:-	0.1293	t414_DIS3	DERL2	NO	NA	NA
ENSG00000133460.19;AF:chr22:23857000:23857531-23862104:23857961:23858029-23862104:+	-0.174655	t414_DIS3	SLC2A11	NO	NA	NA
ENSG00000089820.16;AF:chrX:153921809-153926136:153926260:153921809-153926590:153926757:-	0.144456	t414_DIS3	ARHGAP4	NO	NA	NA
ENSG00000163516.14;AF:chr2:219229806:219229900-219232490:219232182:219232362-219232490:+	-0.176562	t414_DIS3	ANKZF1	NO	NA	NA
ENSG00000214706.10;A5:chr3:50289360-50289447:50289360-50289712:-	-0.110581	t414_DIS3	IFRD2	NO	NA	NA
ENSG00000214021.16;SE:chr3:9827072-9827215:9827240-9828960:+	0.239965	t414_DIS3	TTLL3	NO	NA	NA
ENSG00000103496.15;AF:chr16:31033095:31033522-31034013:31033588:31033835-31034013:+	-0.163301	t414_DIS3	STX4	NO	NA	NA
ENSG00000197912.16;AF:chr16:89490917:89491386-89510490:89508554:89508600-89510490:+	-0.239309	t414_DIS3	SPG7	NO	NA	NA
ENSG00000178927.18;AF:chr17:82449292-82449431:82449726:82449292-82450480:82450770:-	0.109266	t414_DIS3	CYBC1	NO	NA	NA
ENSG00000171174.15;SE:chr2:27858571-27861413:27861546-27890257:-	-0.157285	t414_DIS3	RBKS	NO	NA	NA
ENSG00000149273.15;AL:chr11:75404868-75405614:75405680:75404868-75421727:75422280:+	-0.141822	t414_DIS3	RPS3	NO	NA	NA
ENSG00000111652.10;A5:chr12:6724250-6724614:6724152-6724614:+	0.129996	t414_DIS3	COPS7A	NO	NA	NA
ENSG00000071655.18;AF:chr19:1585214-1591985:1592392:1585214-1592618:1592801:-	-0.148899	t414_DIS3	MBD3	NO	NA	NA
ENSG00000143321.19;AF:chr1:156745373-156751343:156751496:156745373-156752229:156752448:-	0.148777	t414_DIS3	HDGF	NO	NA	NA
ENSG00000115884.11;AF:chr2:20205424-20223203:20223388:20205424-20224191:20224280:-	-0.189681	t414_DIS3	SDC1	NO	NA	NA
ENSG00000092199.17;AF:chr14:21234229-21262601:21262677:21234229-21269298:21269494:-	-0.183205	t414_DIS3	HNRNPC	NO	NA	NA
ENSG00000170037.14;A3:chr17:7948619-7949082:7948619-7949085:+	0.102096	t414_DIS3	CNTROB	NO	NA	NA
ENSG00000175087.10;AF:chr1:26111165:26111420-26114292:26111824:26111915-26114292:+	-0.190331	t414_DIS3	PDIK1L	NO	NA	NA
ENSG00000104964.15;AF:chr19:3061257-3062174:3062277:3061257-3062700:3063107:-	0.162021	t414_DIS3	TLE5	NO	NA	NA
ENSG00000285106.2;A3:chr7:130872758-130884317:130872639-130884317:-	0.220454	t414_DIS3	AC016831.6	NO	NA	NA
ENSG00000116584.20;AF:chr1:155969300-155978365:155978501:155969300-155978913:155979113:-	0.225076	t414_DIS3	ARHGEF2	NO	NA	NA
ENSG00000175455.16;SE:chr3:123956427-123956740:123956795-123961144:-	0.189232	t414_DIS3	CCDC14	NO	NA	NA
ENSG00000171456.20;AF:chr20:32358331:32358832-32366384:32359747:32359791-32366384:+	-0.17439	t414_DIS3	ASXL1	NO	NA	NA
ENSG00000169241.19;AF:chr1:155135357:155135598-155136299:155135897:155135991-155136299:+	0.104881	t414_DIS3	SLC50A1	NO	NA	NA
ENSG00000147421.18;AL:chr8:29049048-29050202:29050654:29049048-29051018:29053270:+	0.290636	t414_DIS3	HMBOX1	NO	NA	NA
ENSG00000114062.22;SE:chr15:25405502-25407067:25407262-25409088:-	-0.104879	t414_DIS3	UBE3A	NO	NA	NA
ENSG00000130305.17;A3:chr7:73303529-73303600:73303524-73303600:-	0.137867	t414_DIS3	NSUN5	NO	NA	NA
ENSG00000269893.8;RI:chr4:118279389:118279431-118279624:118279820:+	0.156497	t414_DIS3	SNHG8	NO	NA	NA
ENSG00000107816.17;AF:chr10:100997072:100997234-101002497:100998687:100998981-101002497:+	0.121465	t414_DIS3	LZTS2	NO	NA	NA
ENSG00000182196.13;A5:chr12:122980745-122981129:122980385-122981129:+	-0.110546	t414_DIS3	ARL6IP4	NO	NA	NA
ENSG00000251364.7;SE:chr11:7428044-7440127:7441719-7450373:-	0.122466	t414_DIS3	AC107884.1	NO	NA	NA
ENSG00000144224.17;SE:chr2:135748369-135753539:135754277-135755517:+	0.108747	t414_DIS3	UBXN4	NO	NA	NA
ENSG00000104419.17;AF:chr8:133284329-133296737:133297586:133284329-133297743:133297958:-	0.157692	t414_DIS3	NDRG1	NO	NA	NA
ENSG00000136732.16;AL:chr2:126656312-126657607:126658767:126656312-126678301:126678887:+	-0.124732	t414_DIS3	GYPC	NO	NA	NA
ENSG00000189339.12;AL:chr1:1659529:1660111-1668327:1663782:1666019-1668327:-	-0.125541	t414_DIS3	SLC35E2B	NO	NA	NA
ENSG00000172531.15;AF:chr11:67401199-67401728:67401815:67401199-67407079:67407264:-	0.206305	t414_DIS3	PPP1CA	NO	NA	NA
ENSG00000163945.18;A5:chr4:1347760-1348090:1347609-1348090:+	0.101204	t414_DIS3	UVSSA	NO	NA	NA
ENSG00000124596.17;AF:chr6:41071675-41072236:41072320:41071675-41072335:41072468:-	-0.214285	t414_DIS3	OARD1	NO	NA	NA
ENSG00000066926.12;A3:chr18:57571603-57573246:57571540-57573246:-	0.1703	t414_DIS3	FECH	NO	NA	NA
ENSG00000183283.16;AL:chr12:51241116-51246061:51246717:51241116-51270718:51271362:+	0.16698	t414_DIS3	DAZAP2	NO	NA	NA
ENSG00000102316.17;RI:chrX:54815248:54815690-54815881:54816007:+	0.11498	t414_DIS3	MAGED2	NO	NA	NA
ENSG00000197183.14;A3:chr20:32465134-32474601:32465117-32474601:-	-0.259776	t414_DIS3	NOL4L	NO	NA	NA
ENSG00000120833.14;AF:chr12:93569814:93570198-93572685:93570980:93571216-93572685:+	-0.162953	t414_DIS3	SOCS2	NO	NA	NA
ENSG00000115290.10;A3:chr2:164508603-164508742:164508550-164508742:-	0.142334	t414_DIS3	GRB14	NO	NA	NA
ENSG00000115271.11;AF:chr2:162344182:162344275-162347578:162344338:162344525-162347578:+	0.140703	t414_DIS3	GCA	NO	NA	NA
ENSG00000105393.16;AL:chr19:17274024-17274107:17274185:17274024-17276495:17276555:+	-0.251837	t414_DIS3	BABAM1	NO	NA	NA
ENSG00000011638.10;A3:chr16:21158746-21160978:21158746-21161085:+	-0.118565	t414_DIS3	TMEM159	NO	NA	NA
ENSG00000105173.14;A5:chr19:29822130-29822240:29821817-29822240:+	0.138326	t414_DIS3	CCNE1	NO	NA	NA
ENSG00000179818.14;AF:chr2:70085624-70085816:70086484:70085624-70086978:70087005:-	-0.194976	t414_DIS3	PCBP1-AS1	NO	NA	NA
ENSG00000154710.18;SE:chr7:66775393-66783675:66783841-66795511:+	0.104475	t414_DIS3	RABGEF1	NO	NA	NA
ENSG00000183354.12;SE:chr9:5929159-5944871:5944960-5954016:-	-0.138406	t414_DIS3	KIAA2026	NO	NA	NA
ENSG00000104907.12;SE:chr19:13110306-13112705:13112817-13112909:-	-0.108771	t414_DIS3	TRMT1	NO	NA	NA
ENSG00000173418.12;A5:chr20:20018200-20022456:20018041-20022456:+	0.14241	t414_DIS3	NAA20	NO	NA	NA
ENSG00000140455.17;SE:chr15:63504830-63529014:63529166-63532647:+	0.114094	t414_DIS3	USP3	NO	NA	NA
ENSG00000178149.17;AF:chr3:49018318-49018400:49018571:49018318-49020846:49021251:-	0.125292	t414_DIS3	DALRD3	NO	NA	NA
ENSG00000066117.15;AL:chr12:50099565-50099800:50099844:50099565-50100054:50100318:+	0.100118	t414_DIS3	SMARCD1	NO	NA	NA
ENSG00000134369.15;SE:chr1:201786577-201788468:201788638-201789740:+	-0.116338	t414_DIS3	NAV1	NO	NA	NA
ENSG00000112763.17;AL:chr6:26466088-26467948:26469637:26466088-26476161:26476619:+	0.122177	t414_DIS3	BTN2A1	NO	NA	NA
ENSG00000115159.16;AF:chr2:156435441:156435804-156476098:156436379:156436513-156476098:+	-0.208053	t414_DIS3	GPD2	NO	NA	NA
ENSG00000126214.21;AF:chr14:103679398:103679545-103692359:103686863:103687211-103692359:+	-0.151655	t414_DIS3	KLC1	NO	NA	NA
ENSG00000151465.14;A3:chr10:12246277-12249581:12246277-12250311:+	0.155464	t414_DIS3	CDC123	NO	NA	NA
ENSG00000155957.18;SE:chr12:66138166-66138724:66138769-66145841:-	0.102094	t414_DIS3	TMBIM4	NO	NA	NA
ENSG00000170852.11;AF:chr7:32879942-32890977:32891153:32879942-32892492:32892733:-	0.236466	t414_DIS3	KBTBD2	NO	NA	NA
ENSG00000214046.8;AL:chr19:16631124:16631724-16647120:16646364:16646800-16647120:-	-0.147109	t414_DIS3	SMIM7	NO	NA	NA
ENSG00000125347.14;SE:chr5:132487130-132487926:132488052-132489392:-	0.106236	t414_DIS3	IRF1	YES	NA	NA
ENSG00000152556.17;A5:chr12:48119462-48122767:48119406-48122767:+	-0.10044	t414_DIS3	PFKM	NO	NA	NA
ENSG00000106829.20;SE:chr9:79704902-79705889:79705942-79708118:+	0.180607	t414_DIS3	TLE4	NO	NA	NA
ENSG00000197182.14;SE:chr22:46098558-46103192:46103249-46109267:+	-0.188687	t414_DIS3	MIRLET7BHG	NO	NA	NA
ENSG00000117054.14;A3:chr1:75724817-75728389:75724817-75728401:+	0.162345	t414_DIS3	ACADM	NO	NA	NA
ENSG00000174227.16;SE:chr4:516185-521056:521249-521660:+	-0.106985	t414_DIS3	PIGG	NO	NA	NA
ENSG00000148444.16;AF:chr10:22316399:22316556-22317884:22316735:22316967-22317884:+	0.163339	t414_DIS3	COMMD3	NO	NA	NA
ENSG00000162910.19;A5:chr1:228108321-228108437:228108321-228108955:-	0.105667	t414_DIS3	MRPL55	NO	NA	NA
ENSG00000160953.16;AF:chr19:1372099:1373160-1376519:1373507:1374049-1376519:+	0.294532	t414_DIS3	PWWP3A	NO	NA	NA
ENSG00000111581.10;A3:chr12:68689619-68690603:68689619-68690631:+	0.205099	t414_DIS3	NUP107	NO	NA	NA
ENSG00000196756.13;RI:chr20:38421006:38421098-38422087:38422241:-	-0.106973	t414_DIS3	SNHG17	NO	NA	NA
ENSG00000154723.12;AF:chr21:25729801-25734939:25735033:25729801-25735315:25735646:-	-0.119892	t414_DIS3	ATP5PF	NO	NA	NA
ENSG00000104960.15;A5:chr19:49851208-49854406:49851096-49854406:+	0.10537	t414_DIS3	PTOV1	NO	NA	NA
ENSG00000117054.14;SE:chr1:75724817-75728389:75728488-75732644:+	0.285106	t414_DIS3	ACADM	NO	NA	NA
ENSG00000129187.14;AF:chr4:182915575-182916286:182916627:182915575-182916673:182916896:-	-0.115351	t414_DIS3	DCTD	NO	NA	NA
ENSG00000213015.9;A3:chr19:55641183-55642439:55641183-55642497:+	-0.101654	t414_DIS3	ZNF580	NO	NA	NA
ENSG00000131943.18;AF:chr19:29708423-29715125:29715261:29708423-29715563:29715789:-	0.341198	t414_DIS3	C19orf12	NO	NA	NA
ENSG00000122008.15;SE:chr5:75511914-75547010:75547157-75552472:+	-0.117506	t414_DIS3	POLK	NO	NA	NA
ENSG00000102984.15;AF:chr16:71883273-71884594:71884809:71883273-71894889:71895336:-	0.162088	t414_DIS3	ZNF821	NO	NA	NA
ENSG00000164022.17;AF:chr4:106316555:106316809-106324985:106320477:106320889-106324985:+	-0.107116	t414_DIS3	AIMP1	NO	NA	NA
ENSG00000072609.17;MX:chr12:132861634-132862333:132862425-132870724:132861634-132869619:132869834-132870724:-	-0.246323	t414_DIS3	CHFR	NO	NA	NA
ENSG00000228863.8;A5:chr1:160683785-160684955:160683695-160684955:+	0.226513	t414_DIS3	AL121985.1	NO	NA	NA
ENSG00000196440.11;SE:chrX:101488099-101488444:101489315-101498145:+	-0.114984	t414_DIS3	ARMCX4	NO	NA	NA
ENSG00000212694.8;AL:chr12:121795267:121796242-121799847:121799172:121799657-121799847:-	0.1241	t414_DIS3	LINC01089	NO	NA	NA
ENSG00000234684.7;A5:chr20:1325782-1373078:1325529-1373078:+	-0.128215	t414_DIS3	SDCBP2-AS1	NO	NA	NA
ENSG00000071889.17;SE:chrX:154508347-154508474:154508652-154511848:-	-0.137967	t414_DIS3	FAM3A	NO	NA	NA
ENSG00000255717.7;SE:chr11:62854064-62854519:62854938-62855133:-	-0.185417	t414_DIS3	SNHG1	NO	NA	NA
ENSG00000133612.19;AF:chr7:151085867:151086009-151116793:151086742:151087072-151116793:+	-0.15072	t414_DIS3	AGAP3	NO	NA	NA
ENSG00000010626.15;A5:chr12:6905250-6905585:6904903-6905585:+	-0.100321	t414_DIS3	LRRC23	NO	NA	NA
ENSG00000103496.15;AF:chr16:31033095:31033522-31034013:31033786:31033835-31034013:+	-0.235594	t414_DIS3	STX4	NO	NA	NA
ENSG00000104960.15;A5:chr19:49851499-49854406:49851208-49854406:+	-0.103925	t414_DIS3	PTOV1	NO	NA	NA
ENSG00000159322.17;SE:chr15:72760527-72771783:72771845-72783246:-	0.155972	t414_DIS3	ADPGK	NO	NA	NA
ENSG00000133063.16;AF:chr1:203240658-203260802:203260862:203240658-203273376:203273641:-	0.210725	t414_DIS3	CHIT1	NO	NA	NA
ENSG00000126088.14;A3:chr1:45014836-45014940:45014836-45015337:+	0.168544	t414_DIS3	UROD	NO	NA	NA
ENSG00000242086.8;AF:chr3:195681616:195681666-195683752:195681988:195682217-195683752:+	-0.221213	t414_DIS3	MUC20-OT1	NO	NA	NA
ENSG00000173575.22;AF:chr15:92900342:92900824-92924321:92904473:92905008-92924321:+	0.141467	t414_DIS3	CHD2	NO	NA	NA
ENSG00000162639.16;AF:chr1:108659962-108660963:108661093:108659962-108661184:108661526:-	0.202559	t414_DIS3	HENMT1	NO	NA	NA
ENSG00000269893.8;RI:chr4:118278755:118278792-118279107:118279137:+	0.156497	t414_DIS3	SNHG8	NO	NA	NA
ENSG00000229980.5;AL:chr17:50867217-50867496:50868307:50867217-50908836:50910774:+	-0.116467	t414_DIS3	TOB1-AS1	NO	NA	NA
ENSG00000143578.16;AF:chr1:153967892:153968184-153968522:153968261:153968310-153968522:+	-0.216691	t414_DIS3	CREB3L4	NO	NA	NA
ENSG00000255508.7;RI:chr11:62572584:62572742-62574677:62574908:-	-0.109069	t414_DIS3	AP002990.1	NO	NA	NA
ENSG00000226471.6;AF:chr22:28800683:28800737-28821972:28801892:28801994-28821972:+	0.207463	t414_DIS3	Z93930.2	NO	NA	NA
ENSG00000140365.16;A5:chr15:75339878-75339965:75339104-75339965:+	0.110322	t414_DIS3	COMMD4	NO	NA	NA
ENSG00000164924.18;A5:chr8:100948900-100951186:100948900-100951235:-	0.135654	t414_DIS3	YWHAZ	NO	NA	NA
ENSG00000153443.13;AF:chr16:4610555-4613960:4614402:4610555-4614678:4614872:-	0.154861	t414_DIS3	UBALD1	NO	NA	NA
ENSG00000071564.17;AF:chr19:1650287-1651050:1651356:1650287-1652300:1652604:-	-0.13243	t414_DIS3	TCF3	NO	NA	NA
ENSG00000183091.19;MX:chr2:151531896-151533442:151533546-151535691:151531896-151534215:151534319-151535691:-	0.117088	t414_DIS3	NEB	NO	NA	NA
ENSG00000204650.14;AL:chr17:45630158-45630485:45630605:45630158-45645901:45655156:+	0.262621	t414_DIS3	LINC02210	NO	NA	NA
ENSG00000152601.17;AF:chr3:152268920:152269092-152414941:152299683:152300367-152414941:+	0.321166	t414_DIS3	MBNL1	NO	NA	NA
ENSG00000168439.17;AF:chr11:64185272:64185974-64193078:64186234:64186270-64193078:+	-0.168767	t414_DIS3	STIP1	NO	NA	NA
ENSG00000133063.16;AF:chr1:203240658-203260802:203260862:203240658-203268518:203272809:-	0.342083	t414_DIS3	CHIT1	NO	NA	NA
ENSG00000166965.12;AF:chr15:90954881:90954948-90956612:90955393:90955883-90956612:+	0.191421	t414_DIS3	RCCD1	NO	NA	NA
ENSG00000009844.16;SE:chr6:142147399-142166228:142166322-142169550:+	-0.156139	t414_DIS3	VTA1	NO	NA	NA
ENSG00000117139.18;SE:chr1:202764145-202766397:202766504-202766926:-	-0.124865	t414_DIS3	KDM5B	NO	NA	NA
ENSG00000116871.15;AF:chr1:36155579:36155733-36170971:36155965:36156463-36170971:+	-0.184528	t414_DIS3	MAP7D1	NO	NA	NA
ENSG00000120948.18;A3:chr1:11023329-11024064:11023329-11024302:+	0.137846	t414_DIS3	TARDBP	NO	NA	NA
ENSG00000132640.15;AF:chr20:11918851:11919176-11919718:11919277:11919423-11919718:+	0.126349	t414_DIS3	BTBD3	NO	NA	NA
ENSG00000204954.10;AF:chr12:103956748-103957069:103957215:103956748-103965516:103965708:-	0.102934	t414_DIS3	C12orf73	NO	NA	NA
ENSG00000131943.18;AF:chr19:29708423-29715125:29715275:29708423-29715563:29715789:-	0.353517	t414_DIS3	C19orf12	NO	NA	NA
ENSG00000165458.14;AF:chr11:72223701:72223803-72224780:72223944:72223960-72224780:+	-0.141327	t414_DIS3	INPPL1	NO	NA	NA
ENSG00000186812.13;SE:chr18:35243293-35245262:35245351-35254232:+	-0.109403	t414_DIS3	ZNF397	NO	NA	NA
ENSG00000117616.18;AF:chr1:25247029-25247309:25247457:25247029-25337040:25338165:-	0.230943	t414_DIS3	RSRP1	NO	NA	NA
ENSG00000184164.15;MX:chr22:49922707-49923234:49923317-49925417:49922707-49924360:49924455-49925417:+	0.185951	t414_DIS3	CRELD2	NO	NA	NA
ENSG00000214941.8;RI:chr17:15977579:15977700-15977800:15977913:-	-0.152146	t414_DIS3	ZSWIM7	NO	NA	NA
ENSG00000110917.8;SE:chr12:120694269-120694824:120695000-120696316:+	-0.100819	t414_DIS3	MLEC	NO	NA	NA
ENSG00000090097.21;SE:chr3:51962088-51962810:51962892-51967326:-	0.110654	t414_DIS3	PCBP4	NO	NA	NA
ENSG00000112237.13;AL:chr6:99543475:99543609-99545112:99543780:99544273-99545112:-	0.174353	t414_DIS3	CCNC	NO	NA	NA
ENSG00000120071.14;AF:chr17:46172232-46192419:46192800:46172232-46192823:46193400:-	0.164449	t414_DIS3	KANSL1	NO	NA	NA
ENSG00000172765.17;AF:chr3:129880559-129893182:129893419:129880559-129893494:129893532:-	-0.126947	t414_DIS3	TMCC1	NO	NA	NA
ENSG00000089820.16;AF:chrX:153921809-153926136:153926244:153921809-153926590:153926757:-	0.119303	t414_DIS3	ARHGAP4	NO	NA	NA
ENSG00000204524.7;SE:chr19:57240921-57243923:57244049-57248605:+	-0.132083	t414_DIS3	ZNF805	NO	NA	NA
ENSG00000133943.20;AL:chr14:91215556-91220443:91220766:91215556-91224684:91225355:+	0.123589	t414_DIS3	DGLUCY	NO	NA	NA
ENSG00000134369.15;SE:chr1:201793875-201794172:201794246-201794466:+	-0.158193	t414_DIS3	NAV1	NO	NA	NA
ENSG00000162645.13;RI:chr1:89106132:89107052-89108023:89108291:-	-0.116246	t414_DIS3	GBP2	NO	NA	NA
ENSG00000154237.13;SE:chr15:100919451-100920031:100920255-100924511:+	-0.11755	t414_DIS3	LRRK1	NO	NA	NA
ENSG00000099326.9;AF:chr19:58571429-58572550:58572775:58571429-58573055:58573335:-	0.152634	t414_DIS3	MZF1	NO	NA	NA
ENSG00000204316.13;AF:chr17:75899674-75900308:75900473:75899674-75900774:75900924:-	-0.128075	t414_DIS3	MRPL38	NO	NA	NA
ENSG00000146872.18;AF:chr17:62477839:62478081-62481124:62479025:62479290-62481124:+	-0.204504	t414_DIS3	TLK2	NO	NA	NA
ENSG00000175727.14;AL:chr12:122138551-122138815:122138941:122138551-122140827:122140948:+	-0.2721	t414_DIS3	MLXIP	NO	NA	NA
ENSG00000205981.8;SE:chr3:180985996-180986998:180987022-180988023:-	-0.143979	t414_DIS3	DNAJC19	NO	NA	NA
ENSG00000114904.13;SE:chr3:52746904-52749692:52749829-52751932:-	-0.102611	t414_DIS3	NEK4	NO	NA	NA
ENSG00000235954.7;AL:chr22:28001658-28002217:28002640:28001658-28006529:28008581:+	0.21963	t414_DIS3	TTC28-AS1	NO	NA	NA
ENSG00000143479.17;AL:chr1:206637761-206647388:206649197:206637761-206682907:206684419:+	0.171552	t414_DIS3	DYRK3	NO	NA	NA
ENSG00000214078.12;A5:chr20:35659014-35664359:35659014-35664760:-	-0.157456	t414_DIS3	CPNE1	NO	NA	NA
ENSG00000073584.20;A3:chr17:40632367-40635931:40631693-40635931:-	0.157204	t414_DIS3	SMARCE1	NO	NA	NA
ENSG00000131446.17;AF:chr5:180809076-180809634:180809829:180809076-180810192:180810503:-	0.166011	t414_DIS3	MGAT1	NO	NA	NA
ENSG00000166261.11;A3:chr11:123740232-123740417:123740192-123740417:-	0.162901	t414_DIS3	ZNF202	NO	NA	NA
ENSG00000126088.14;A5:chr1:45015006-45015337:45014836-45015337:+	0.186891	t414_DIS3	UROD	NO	NA	NA
ENSG00000138777.20;AL:chr4:105399079:105399164-105424196:105405637:105405948-105424196:-	-0.14072	t414_DIS3	PPA2	NO	NA	NA
ENSG00000069399.15;AF:chr19:44747705:44748128-44751227:44748708:44749046-44751227:+	-0.10014	t414_DIS3	BCL3	NO	NA	NA
ENSG00000134444.15;SE:chr18:62279856-62280360:62280442-62280646:+	-0.102884	t414_DIS3	RELCH	NO	NA	NA
ENSG00000176623.12;AL:chr8:86474246:86474358-86474820:86474412:86474657-86474820:-	0.112078	t414_DIS3	RMDN1	NO	NA	NA
ENSG00000148444.16;RI:chr10:22318272:22318306-22318959:22319018:+	0.148332	t414_DIS3	COMMD3	NO	NA	NA
ENSG00000185684.15;AF:chr12:132085226:132085316-132103997:132090651:132090943-132103997:+	-0.136545	t414_DIS3	EP400P1	NO	NA	NA
ENSG00000140694.17;AF:chr16:14629674-14630107:14630247:14629674-14632390:14632728:-	0.241556	t414_DIS3	PARN	NO	NA	NA
ENSG00000123505.19;AF:chr6:110874784:110875215-110892299:110890789:110892203-110892299:+	-0.213243	t414_DIS3	AMD1	NO	NA	NA
ENSG00000182484.15;RI:chrX:156022323:156022459-156022699:156022834:+	0.122537	t414_DIS3	WASH6P	NO	NA	NA
ENSG00000214078.12;AF:chr20:35632923-35653528:35653677:35632923-35664802:35664877:-	-0.127721	t414_DIS3	CPNE1	NO	NA	NA
ENSG00000233461.6;A3:chr1:231522790-231527338:231522637-231527338:-	-0.157705	t414_DIS3	AL445524.1	NO	NA	NA
ENSG00000179021.10;AF:chr3:88149987:88150185-88153230:88150604:88151072-88153230:+	0.224177	t414_DIS3	C3orf38	NO	NA	NA
ENSG00000146457.16;AF:chr6:159725585:159727333-159736258:159727506:159727703-159736258:+	-0.165199	t414_DIS3	WTAP	NO	NA	NA
ENSG00000135916.16;AF:chr2:230864980:230865145-230873417:230865248:230865386-230873417:+	0.121402	t414_DIS3	ITM2C	NO	NA	NA
ENSG00000015676.18;AF:chr7:44485284-44489823:44490265:44485284-44490409:44490658:-	-0.11438	t414_DIS3	NUDCD3	NO	NA	NA
ENSG00000213593.10;SE:chr11:57737668-57737836:57738026-57738664:+	0.101431	t414_DIS3	TMX2	NO	NA	NA
ENSG00000126247.11;AF:chr19:36140108:36140157-36140997:36140608:36140913-36140997:+	0.215172	t414_DIS3	CAPNS1	NO	NA	NA
ENSG00000204628.12;AF:chr5:181242345-181242554:181243370:181242345-181247124:181247576:-	0.243159	t414_DIS3	RACK1	NO	NA	NA
ENSG00000198815.9;AF:chr1:42311110-42335059:42335215:42311110-42335626:42335877:-	0.20359	t414_DIS3	FOXJ3	NO	NA	NA
ENSG00000109184.15;A5:chr4:51887244-51891760:51886638-51891760:+	0.102168	t414_DIS3	DCUN1D4	NO	NA	NA
ENSG00000130749.10;SE:chr19:47094608-47110895:47110956-47112148:-	-0.125206	t414_DIS3	ZC3H4	NO	NA	NA
ENSG00000269893.8;A3:chr4:118278792-118278944:118278792-118279107:+	0.148055	t414_DIS3	SNHG8	NO	NA	NA
ENSG00000171163.16;A5:chr1:248855458-248855558:248855458-248855725:-	0.122268	t414_DIS3	ZNF692	NO	NA	NA
ENSG00000099326.9;AF:chr19:58571429-58572550:58572775:58571429-58573373:58573575:-	0.130122	t414_DIS3	MZF1	NO	NA	NA
ENSG00000103275.20;AF:chr16:1309758:1309773-1314020:1309803:1310253-1314020:+	0.135814	t414_DIS3	UBE2I	NO	NA	NA
ENSG00000073584.20;MX:chr17:40637572-40642455:40642559-40647773:40637572-40645796:40645847-40647773:-	0.242013	t414_DIS3	SMARCE1	NO	NA	NA
ENSG00000122008.15;A3:chr5:75590440-75593878:75590440-75593966:+	-0.107912	t414_DIS3	POLK	NO	NA	NA
ENSG00000160710.17;AF:chr1:154602626-154607992:154608170:154602626-154627855:154627968:-	-0.101189	t414_DIS3	ADAR	NO	NA	NA
ENSG00000198830.11;RI:chr1:26473483:26473527-26473703:26474135:+	0.100891	t414_DIS3	HMGN2	NO	NA	NA
ENSG00000006744.19;AF:chr17:13017121-13017582:13017683:13017121-13017703:13018027:-	0.148134	t414_DIS3	ELAC2	NO	NA	NA
ENSG00000182150.18;AF:chr9:95875701:95876084-95880869:95876143:95877105-95880869:+	0.16895	t414_DIS3	ERCC6L2	NO	NA	NA
ENSG00000169814.16;AL:chr3:15642057-15644316:15645797:15642057-15710060:15712776:+	-0.105259	t414_DIS3	BTD	NO	NA	NA
ENSG00000136104.21;AL:chr13:50949505-50950026:50950237:50949505-50969932:50970357:+	-0.113108	t414_DIS3	RNASEH2B	NO	NA	NA
ENSG00000076108.11;AF:chr12:56617532-56629973:56630297:56617532-56636182:56636366:-	-0.149649	t414_DIS3	BAZ2A	NO	NA	NA
ENSG00000093010.14;AL:chr22:19964299-19967164:19967694:19964299-19968536:19968998:+	-0.280074	t414_DIS3	COMT	NO	NA	NA
ENSG00000138380.18;SE:chr2:202918043-202924297:202924415-202941860:+	-0.111883	t414_DIS3	CARF	NO	NA	NA
ENSG00000169756.16;AF:chr2:108621251:108621461-108659605:108657894:108657940-108659605:+	-0.14332	t414_DIS3	LIMS1	NO	NA	NA
ENSG00000131788.16;AF:chr1:145857006-145858967:145859049:145857006-145859665:145859779:-	-0.187723	t414_DIS3	PIAS3	NO	NA	NA
ENSG00000205581.11;SE:chr21:39345958-39347247:39347292-39347379:-	-0.100179	t414_DIS3	HMGN1	NO	NA	NA
ENSG00000105971.15;SE:chr7:116499931-116500260:116500447-116505971:+	0.111239	t414_DIS3	CAV2	NO	NA	NA
ENSG00000106344.8;SE:chr7:128324694-128325818:128325891-128330819:-	0.301815	t414_DIS3	RBM28	NO	NA	NA
ENSG00000142528.16;SE:chr19:50026122-50030892:50031091-50039161:+	0.321569	SF3B1	ZNF473	NO	NA	NA
ENSG00000066855.16;AL:chr8:65719481-65720404:65720596:65719481-65770947:65771261:+	-0.200014	SF3B1	MTFR1	NO	NA	NA
ENSG00000198858.10;AF:chr19:902130-902242:902410:902130-913087:913245:-	-0.26302	SF3B1	R3HDM4	NO	NA	NA
ENSG00000104881.16;SE:chr19:45398339-45404999:45405081-45406292:-	0.228571	SF3B1	PPP1R13L	NO	NA	NA
ENSG00000153310.19;MX:chr8:129879471-129879597:129879789-129903312:129879471-129896672:129896854-129903312:-	0.355622	SF3B1	CYRIB	NO	NA	NA
ENSG00000141562.18;AF:chr17:82458185:82458508-82459992:82458697:82458830-82459992:+	0.113088	SF3B1	NARF	NO	NA	NA
ENSG00000188529.15;A3:chr1:23975080-23977911:23975051-23977911:-	0.146663	SF3B1	SRSF10	NO	NA	NA
ENSG00000120948.18;AF:chr1:11012424:11012480-11013716:11012654:11012743-11013716:+	0.3134	SF3B1	TARDBP	NO	NA	NA
ENSG00000132341.12;SE:chr12:130872126-130872584:130872629-130872836:+	0.112466	SF3B1	RAN	NO	NA	NA
ENSG00000197062.11;A5:chr6:28272336-28272670:28271934-28272670:+	0.150619	SF3B1	ZSCAN26	NO	NA	NA
ENSG00000106415.13;AF:chr7:7969687:7969807-8003908:7970441:7970505-8003908:+	-0.390843	SF3B1	GLCCI1	NO	NA	NA
ENSG00000087266.17;AF:chr4:2812291:2812477-2820614:2818185:2818390-2820614:+	-0.201428	SF3B1	SH3BP2	NO	NA	NA
ENSG00000111481.10;AF:chr12:54325151:54325181-54340547:54325584:54325682-54340547:+	0.273307	SF3B1	COPZ1	NO	NA	NA
ENSG00000004975.12;AF:chr17:7230797-7233936:7234061:7230797-7234069:7234223:-	-0.327974	SF3B1	DVL2	NO	NA	NA
ENSG00000159023.21;AF:chr1:28893371:28893837-28987431:28914601:28914768-28987431:+	-0.215999	SF3B1	EPB41	NO	NA	NA
ENSG00000140105.18;SE:chr14:100361921-100369087:100369258-100376260:-	-0.118988	SF3B1	WARS1	NO	NA	NA
ENSG00000144895.12;SE:chr3:150564381-150567693:150567766-150567902:+	0.166856	SF3B1	EIF2A	NO	NA	NA
ENSG00000249859.12;AF:chr8:127994949:127995228-128009590:127998358:127998359-128009590:+	-0.162994	SF3B1	PVT1	NO	NA	NA
ENSG00000173744.17;SE:chr2:227536993-227550059:227550106-227551959:+	0.167858	SF3B1	AGFG1	NO	NA	NA
ENSG00000125375.16;AL:chr14:50324116-50324547:50324706:50324116-50325609:50327957:+	0.119982	SF3B1	DMAC2L	NO	NA	NA
ENSG00000182247.10;SE:chr3:23217312-23499608:23499740-23532554:+	0.146973	SF3B1	UBE2E2	NO	NA	NA
ENSG00000179818.14;AF:chr2:70085624-70085816:70086483:70085624-70086978:70087015:-	0.364695	SF3B1	PCBP1-AS1	NO	NA	NA
ENSG00000079337.16;SE:chr12:47740395-47740642:47740823-47740915:-	-0.100514	SF3B1	RAPGEF3	NO	NA	NA
ENSG00000072756.17;AF:chr3:3126948:3126990-3129014:3127020:3128018-3129014:+	-0.140231	SF3B1	TRNT1	NO	NA	NA
ENSG00000047249.18;AF:chr8:53841725-53842504:53842899:53841725-53843034:53843259:-	-0.288305	SF3B1	ATP6V1H	NO	NA	NA
ENSG00000196150.13;A3:chr8:144882836-144886840:144880458-144886840:-	0.242717	SF3B1	ZNF250	NO	NA	NA
ENSG00000109775.11;AL:chr4:185400315:185400478-185403494:185402262:185402344-185403494:-	0.147621	SF3B1	UFSP2	NO	NA	NA
ENSG00000177311.11;AF:chr3:141386875:141386937-141403927:141402349:141402449-141403927:+	-0.132906	SF3B1	ZBTB38	NO	NA	NA
ENSG00000163875.16;MX:chr1:37495918-37496547:37496604-37501804:37495918-37496707:37496736-37501804:-	-0.12264	SF3B1	MEAF6	NO	NA	NA
ENSG00000156858.12;RI:chr16:30651596:30651668-30651796:30651964:+	0.131454	SF3B1	PRR14	NO	NA	NA
ENSG00000113648.16;AF:chr5:135346057-135350823:135350955:135346057-135352946:135362901:-	-0.106503	SF3B1	MACROH2A1	NO	NA	NA
ENSG00000139116.19;SE:chr12:39311553-39318073:39318201-39319906:-	0.131801	SF3B1	KIF21A	NO	NA	NA
ENSG00000197150.12;A3:chr7:151036649-151037241:151036649-151037284:+	0.119803	SF3B1	ABCB8	NO	NA	NA
ENSG00000014641.21;AF:chr2:63588973:63589046-63599170:63597548:63597574-63599170:+	-0.467174	SF3B1	MDH1	NO	NA	NA
ENSG00000166508.18;AF:chr7:100100093-100100213:100100780:100100093-100101264:100101940:-	0.254117	SF3B1	MCM7	NO	NA	NA
ENSG00000140379.8;SE:chr15:79961174-79967637:79967692-79970700:-	0.152272	SF3B1	BCL2A1	NO	NA	NA
ENSG00000133943.20;SE:chr14:91199905-91204706:91204867-91215405:+	0.10058	SF3B1	DGLUCY	NO	NA	NA
ENSG00000110074.11;AF:chr11:126269194:126269415-126272969:126270945:126271657-126272969:+	-0.158855	SF3B1	FOXRED1	NO	NA	NA
ENSG00000157193.18;SE:chr1:53271346-53272604:53272642-53275631:-	0.115351	SF3B1	LRP8	NO	NA	NA
ENSG00000063978.16;AF:chr4:2468729:2468927-2490337:2469068:2469258-2490337:+	0.359608	SF3B1	RNF4	NO	NA	NA
ENSG00000204438.11;AF:chr6:31665003-31665400:31665442:31665003-31665559:31665630:-	0.218593	SF3B1	GPANK1	NO	NA	NA
ENSG00000122481.17;A5:chr1:95244698-95246542:95244651-95246542:+	0.165875	SF3B1	RWDD3	NO	NA	NA
ENSG00000101194.18;AF:chr20:62952709:62952889-62956765:62953046:62953272-62956765:+	-0.194931	SF3B1	SLC17A9	NO	NA	NA
ENSG00000187609.16;SE:chr9:137354377-137354567:137354773-137356268:-	0.195045	SF3B1	EXD3	NO	NA	NA
ENSG00000196670.14;AF:chr5:180852060-180860528:180860663:180852060-180861219:180861285:-	-0.100872	SF3B1	ZFP62	NO	NA	NA
ENSG00000112699.11;AF:chr6:2124731-2175932:2175991:2124731-2245321:2245605:-	-0.111104	SF3B1	GMDS	NO	NA	NA
ENSG00000147679.12;SE:chr8:116766791-116770192:116770366-116779483:+	0.381797	SF3B1	UTP23	NO	NA	NA
ENSG00000215845.11;SE:chr1:161038075-161038551:161038694-161038880:-	-0.120324	SF3B1	TSTD1	NO	NA	NA
ENSG00000120832.10;A3:chr12:106985225-106986969:106985215-106986969:-	0.20868	SF3B1	MTERF2	NO	NA	NA
ENSG00000166902.5;AF:chr11:59809920-59810240:59810300:59809920-59810604:59810773:-	-0.189061	SF3B1	MRPL16	NO	NA	NA
ENSG00000182919.15;AF:chr11:93741670:93741728-93750346:93746485:93747448-93750346:+	0.425704	SF3B1	C11orf54	NO	NA	NA
ENSG00000141013.17;A3:chr16:90027722-90031176:90027722-90031299:+	-0.163686	SF3B1	GAS8	NO	NA	NA
ENSG00000105171.10;A3:chr19:29608709-29610320:29608709-29610409:+	-0.130866	SF3B1	POP4	NO	NA	NA
ENSG00000090447.12;AF:chr16:4262701-4263667:4263737:4262701-4272658:4273075:-	-0.214931	SF3B1	TFAP4	NO	NA	NA
ENSG00000006740.17;SE:chr17:12958897-12973302:12973319-12974089:+	0.293581	SF3B1	ARHGAP44	NO	NA	NA
ENSG00000153094.24;SE:chr2:111124139-111142313:111142391-111144488:+	0.314077	SF3B1	BCL2L11	NO	NA	NA
ENSG00000123600.20;SE:chr2:171360513-171392043:171392197-171414603:-	0.205493	SF3B1	METTL8	NO	NA	NA
ENSG00000163875.16;SE:chr1:37495918-37496547:37496604-37496707:-	-0.438219	SF3B1	MEAF6	NO	NA	NA
ENSG00000230943.3;A5:chr6:113623822-113627470:113623822-113627521:-	-0.139239	SF3B1	LINC02541	NO	NA	NA
ENSG00000128573.26;SE:chr7:114628677-114629592:114629642-114629805:+	-0.176167	SF3B1	FOXP2	NO	NA	NA
ENSG00000156983.16;A5:chr3:9742171-9742944:9742153-9742944:+	0.112763	SF3B1	BRPF1	NO	NA	NA
ENSG00000095951.17;SE:chr6:12125870-12129759:12129892-12130767:+	0.224005	SF3B1	HIVEP1	NO	NA	NA
ENSG00000206337.12;SE:chr6:31463279-31463371:31463508-31477027:+	-0.145032	SF3B1	HCP5	NO	NA	NA
ENSG00000003402.20;AF:chr2:201116239:201116481-201129729:201122477:201122747-201129729:+	0.160647	SF3B1	CFLAR	NO	NA	NA
ENSG00000135951.16;SE:chr2:99148348-99154291:99154427-99154693:-	0.262256	SF3B1	TSGA10	NO	NA	NA
ENSG00000143321.19;AF:chr1:156745373-156747435:156747471:156745373-156751343:156751675:-	-0.117775	SF3B1	HDGF	NO	NA	NA
ENSG00000006194.10;SE:chr16:3284205-3285681:3285754-3286023:+	-0.148993	SF3B1	ZNF263	NO	NA	NA
ENSG00000123349.14;A3:chr12:53295639-53295839:53295639-53296454:+	0.172794	SF3B1	PFDN5	NO	NA	NA
ENSG00000258818.4;A5:chr14:20684758-20699355:20684696-20699355:+	0.144837	SF3B1	RNASE4	NO	NA	NA
ENSG00000160211.19;AF:chrX:154546163-154546789:154546838:154546163-154547468:154547572:-	-0.238105	SF3B1	G6PD	NO	NA	NA
ENSG00000160408.14;SE:chr9:127896332-127897956:127898010-127899503:-	-0.277648	SF3B1	ST6GALNAC6	NO	NA	NA
ENSG00000101266.19;SE:chr20:505229-508451:508605-543672:-	0.248791	SF3B1	CSNK2A1	NO	NA	NA
ENSG00000134330.19;AF:chr2:9473658:9473899-9478222:9475674:9476039-9478222:+	0.185028	SF3B1	IAH1	NO	NA	NA
ENSG00000087460.26;AF:chr20:58889171:58889353-58895612:58891302:58891865-58895612:+	-0.105408	SF3B1	GNAS	NO	NA	NA
ENSG00000166938.13;A3:chr15:66295141-66306762:66295141-66306897:+	0.264085	SF3B1	DIS3L	NO	NA	NA
ENSG00000168781.22;SE:chr15:43558932-43564103:43564165-43564867:-	-0.115011	SF3B1	PPIP5K1	NO	NA	NA
ENSG00000099622.14;AF:chr19:1259384:1259638-1270928:1269352:1269410-1270928:+	-0.237165	SF3B1	CIRBP	NO	NA	NA
ENSG00000226752.9;AF:chr9:120845310:120845620-120847294:120846599:120846861-120847294:+	-0.151146	SF3B1	CUTALP	NO	NA	NA
ENSG00000063854.13;AF:chr16:1823037-1826712:1826802:1823037-1826941:1827157:-	0.332366	SF3B1	HAGH	NO	NA	NA
ENSG00000121310.17;A5:chr1:52914095-52921483:52914095-52921553:-	-0.176315	SF3B1	ECHDC2	NO	NA	NA
ENSG00000100997.20;MX:chr20:25300884-25301332:25301378-25302219:25300884-25301719:25302034-25302219:-	-0.22861	SF3B1	ABHD12	NO	NA	NA
ENSG00000114796.16;SE:chr3:183635793-183636221:183636311-183643480:+	-0.10413	SF3B1	KLHL24	NO	NA	NA
ENSG00000168724.17;A3:chr5:34945025-34945722:34945025-34945761:+	-0.192644	SF3B1	DNAJC21	NO	NA	NA
ENSG00000161010.15;SE:chr5:179848066-179853197:179853276-179853378:-	-0.135605	SF3B1	MRNIP	NO	NA	NA
ENSG00000153827.14;AF:chr2:229880128-229921564:229921662:229880128-229921880:229922009:-	0.106693	SF3B1	TRIP12	NO	NA	NA
ENSG00000141646.14;AF:chr18:51029614:51029744-51046920:51030213:51030623-51046920:+	-0.140418	SF3B1	SMAD4	NO	NA	NA
ENSG00000154263.17;A5:chr17:69149088-69149984:69149088-69149988:-	-0.11702	SF3B1	ABCA10	NO	NA	NA
ENSG00000104529.17;SE:chr8:143586849-143593875:143594071-143597348:-	-0.145717	SF3B1	EEF1D	NO	NA	NA
ENSG00000162576.17;RI:chr1:1354193:1354232-1354354:1354509:-	-0.165114	SF3B1	MXRA8	NO	NA	NA
ENSG00000169567.13;SE:chr5:131162676-131163331:131163492-131164305:-	0.125225	SF3B1	HINT1	NO	NA	NA
ENSG00000064490.14;A3:chr19:19197046-19197186:19197046-19197521:+	0.106216	SF3B1	RFXANK	NO	NA	NA
ENSG00000169567.13;AF:chr5:131162676-131164305:131164496:131162676-131165060:131165333:-	-0.218193	SF3B1	HINT1	NO	NA	NA
ENSG00000197530.12;AF:chr1:1616274:1616614-1623431:1617577:1617715-1623431:+	-0.207937	SF3B1	MIB2	NO	NA	NA
ENSG00000095397.16;AF:chr9:114478771-114503107:114503173:114478771-114504184:114504549:-	-0.225236	SF3B1	WHRN	NO	NA	NA
ENSG00000239779.7;SE:chr2:74459098-74459478:74459562-74459643:+	-0.102217	SF3B1	WBP1	NO	NA	NA
ENSG00000171792.11;A3:chr12:2877282-2885263:2877282-2885283:+	-0.149626	SF3B1	RHNO1	NO	NA	NA
ENSG00000166508.18;AF:chr7:100100093-100100213:100100757:100100093-100101264:100101409:-	-0.194235	SF3B1	MCM7	NO	NA	NA
ENSG00000167565.13;AF:chr19:40442086-40442327:40442598:40442086-40443855:40444062:-	-0.164538	SF3B1	SERTAD3	NO	NA	NA
ENSG00000125347.14;AF:chr5:132489483-132490050:132490262:132489483-132490545:132490765:-	0.443424	SF3B1	IRF1	YES	NA	NA
ENSG00000182919.15;SE:chr11:93741728-93747302:93747448-93750346:+	-0.171087	SF3B1	C11orf54	NO	NA	NA
ENSG00000123106.10;AF:chr12:28190438:28190641-28257202:28256004:28256078-28257202:+	0.433523	SF3B1	CCDC91	NO	NA	NA
ENSG00000149582.16;AL:chr11:118534355-118535508:118535833:118534355-118546119:118546484:+	-0.12452	SF3B1	TMEM25	NO	NA	NA
ENSG00000206503.13;RI:chr6:29942757:29942854-29943285:29943543:+	0.222552	SF3B1	HLA-A	NO	NA	NA
ENSG00000092529.25;A5:chr15:42410496-42410588:42409995-42410588:+	-0.134312	SF3B1	CAPN3	NO	NA	NA
ENSG00000247708.8;AL:chr4:4544907-4550509:4552475:4544907-4585643:4588294:+	-0.244216	SF3B1	STX18-AS1	NO	NA	NA
ENSG00000132286.12;SE:chr11:6481555-6481757:6481852-6482045:+	-0.124866	SF3B1	TIMM10B	NO	NA	NA
ENSG00000126883.17;A3:chr9:131144754-131146129:131144754-131146165:+	-0.199326	SF3B1	NUP214	NO	NA	NA
ENSG00000153113.24;SE:chr5:96740118-96740745:96740783-96741266:+	-0.282264	SF3B1	CAST	NO	NA	NA
ENSG00000170906.16;AL:chr19:54106011-54106811:54106961:54106011-54108440:54108533:+	-0.332356	SF3B1	NDUFA3	NO	NA	NA
ENSG00000175110.11;RI:chr3:139350179:139350322-139351031:139351060:+	0.11175	SF3B1	MRPS22	NO	NA	NA
ENSG00000047315.17;SE:chr4:56986426-56990748:56990898-56994404:+	-0.129884	SF3B1	POLR2B	NO	NA	NA
ENSG00000124357.13;AF:chr2:71068308:71068336-71070502:71068662:71069061-71070502:+	-0.18794	SF3B1	NAGK	NO	NA	NA
ENSG00000157349.17;SE:chr16:70299354-70312609:70312657-70314902:+	-0.103113	SF3B1	DDX19B	NO	NA	NA
ENSG00000214021.16;SE:chr3:9829395-9833104:9833245-9834681:+	0.119023	SF3B1	TTLL3	NO	NA	NA
ENSG00000182247.10;AF:chr3:23203162:23203262-23208692:23203330:23203464-23208692:+	-0.275949	SF3B1	UBE2E2	NO	NA	NA
ENSG00000167323.11;AF:chr11:3854527:3854736-3967552:3855703:3856409-3967552:+	0.177125	SF3B1	STIM1	NO	NA	NA
ENSG00000171469.11;AL:chr19:9604680:9604932-9614021:9610956:9611336-9614021:-	-0.212905	SF3B1	ZNF561	NO	NA	NA
ENSG00000145916.19;MX:chr5:178131376-178135173:178135312-178138108:178131376-178136029:178136248-178138108:+	-0.324333	SF3B1	RMND5B	NO	NA	NA
ENSG00000140876.11;SE:chr16:77725584-77735828:77735986-77741582:+	-0.286032	SF3B1	NUDT7	NO	NA	NA
ENSG00000109332.20;AF:chr4:102826636-102827427:102827566:102826636-102868715:102868875:-	0.12037	SF3B1	UBE2D3	NO	NA	NA
ENSG00000110074.11;A3:chr11:126273454-126274927:126273454-126275327:+	-0.146375	SF3B1	FOXRED1	NO	NA	NA
ENSG00000244682.7;SE:chr1:161581549-161583090:161583193-161588422:+	-0.130413	SF3B1	FCGR2C	NO	NA	NA
ENSG00000164674.15;RI:chr6:158662750:158662812-158663205:158663378:+	0.185239	SF3B1	SYTL3	NO	NA	NA
ENSG00000177853.14;AF:chr10:96129715:96129992-96132586:96130072:96130118-96132586:+	-0.409123	SF3B1	ZNF518A	NO	NA	NA
ENSG00000225470.8;SE:chrX:73944662-73984444:73984541-73994840:+	-0.135366	SF3B1	JPX	NO	NA	NA
ENSG00000122481.17;AF:chr1:95234268:95234315-95246756:95246058:95246657-95246756:+	-0.215035	SF3B1	RWDD3	NO	NA	NA
ENSG00000173531.15;A3:chr3:49684884-49685012:49684835-49685012:-	0.127656	SF3B1	MST1	NO	NA	NA
ENSG00000058799.15;SE:chr1:53852270-53855001:53855051-53860056:-	-0.118193	SF3B1	YIPF1	NO	NA	NA
ENSG00000166508.18;AF:chr7:100100093-100100213:100100757:100100093-100101264:100101940:-	-0.376646	SF3B1	MCM7	NO	NA	NA
ENSG00000070669.17;AF:chr7:97869813-97872041:97872165:97869813-97872351:97872436:-	-0.170552	SF3B1	ASNS	NO	NA	NA
ENSG00000129187.14;AF:chr4:182916539-182916673:182917253:182916539-182917288:182917477:-	-0.205431	SF3B1	DCTD	NO	NA	NA
ENSG00000203666.12;AL:chr1:245083688-245087245:245087839:245083688-245091027:245091806:+	0.200496	SF3B1	EFCAB2	NO	NA	NA
ENSG00000101608.13;AF:chr18:3247481:3247587-3253233:3252218:3252482-3253233:+	0.166614	SF3B1	MYL12A	NO	NA	NA
ENSG00000156482.11;SE:chr8:98042775-98044827:98045088-98045347:-	0.17904	SF3B1	RPL30	NO	NA	NA
ENSG00000132341.12;RI:chr12:130872584:130872629-130872836:130872920:+	-0.119052	SF3B1	RAN	NO	NA	NA
ENSG00000177731.16;RI:chr17:18245230:18245272-18245354:18245419:-	-0.121845	SF3B1	FLII	NO	NA	NA
ENSG00000153391.16;A3:chr18:35487823-35489332:35487439-35489332:-	-0.286046	SF3B1	INO80C	NO	NA	NA
ENSG00000134419.15;A5:chr16:18789118-18789897:18789118-18790244:-	-0.122101	SF3B1	RPS15A	NO	NA	NA
ENSG00000034533.12;AF:chr3:131025594-131026188:131026609:131025594-131026732:131026792:-	-0.168199	SF3B1	ASTE1	NO	NA	NA
ENSG00000107263.18;AF:chr9:131650949-131737405:131737538:131650949-131739770:131739944:-	0.169882	SF3B1	RAPGEF1	NO	NA	NA
ENSG00000153113.24;AF:chr5:96662055:96662165-96675539:96662423:96662497-96675539:+	0.296138	SF3B1	CAST	NO	NA	NA
ENSG00000172530.20;SE:chr16:87984259-88003482:88003563-88004295:+	-0.103276	SF3B1	BANP	NO	NA	NA
ENSG00000113712.19;SE:chr5:149509953-149511066:149511158-149511794:-	-0.12536	SF3B1	CSNK1A1	NO	NA	NA
ENSG00000162066.15;A5:chr16:2528718-2528994:2528559-2528994:+	0.120207	SF3B1	AMDHD2	NO	NA	NA
ENSG00000154358.21;A3:chr1:228339026-228339942:228339026-228339945:+	-0.195986	SF3B1	OBSCN	NO	NA	NA
ENSG00000100413.17;SE:chr22:41532157-41532604:41532745-41540699:-	0.175091	SF3B1	POLR3H	NO	NA	NA
ENSG00000008130.15;AF:chr1:1765446-1778289:1778470:1765446-1778746:1778790:-	0.13232	SF3B1	NADK	NO	NA	NA
ENSG00000088876.13;AF:chr20:2500742-2508881:2508922:2500742-2524455:2524522:-	-0.256082	SF3B1	ZNF343	NO	NA	NA
ENSG00000198001.14;SE:chr12:43768272-43771038:43771104-43771220:+	-0.110415	SF3B1	IRAK4	NO	NA	NA
ENSG00000072756.17;AF:chr3:3126948:3126990-3129014:3127061:3127289-3129014:+	-0.133943	SF3B1	TRNT1	NO	NA	NA
ENSG00000225470.8;AL:chrX:73998844-73998954:74000495:73998844-74004270:74004502:+	-0.322603	SF3B1	JPX	NO	NA	NA
ENSG00000113569.16;AF:chr5:37364384-37370666:37370785:37364384-37370821:37371106:-	-0.238334	SF3B1	NUP155	NO	NA	NA
ENSG00000124357.13;AF:chr2:71068592:71068712-71072641:71068978:71071827-71072641:+	-0.254006	SF3B1	NAGK	NO	NA	NA
ENSG00000111481.10;AF:chr12:54325109:54325181-54340547:54325584:54325682-54340547:+	0.207547	SF3B1	COPZ1	NO	NA	NA
ENSG00000115275.14;SE:chr2:74463012-74463190:74463219-74463380:-	-0.26246	SF3B1	MOGS	NO	NA	NA
ENSG00000140474.14;AF:chr15:74842420-74842535:74842676:74842420-74843004:74843124:-	0.371653	SF3B1	ULK3	NO	NA	NA
ENSG00000121864.10;SE:chr3:179329728-179329934:179330055-179332989:+	-0.15641	SF3B1	ZNF639	NO	NA	NA
ENSG00000205581.11;SE:chr21:39345274-39345830:39345958-39347247:-	0.214542	SF3B1	HMGN1	NO	NA	NA
ENSG00000185495.10;AL:chr1:224003654-224004725:224004792:224003654-224009320:224009703:+	-0.175967	SF3B1	SEPTIN7P13	NO	NA	NA
ENSG00000077463.15;RI:chr19:4175028:4175111-4175680:4175760:-	0.151018	SF3B1	SIRT6	NO	NA	NA
ENSG00000204564.12;RI:chr6:30652648:30652717-30652802:30653109:+	-0.170302	SF3B1	C6orf136	NO	NA	NA
ENSG00000013375.16;SE:chr6:83176060-83178673:83178756-83181736:-	0.30317	SF3B1	PGM3	NO	NA	NA
ENSG00000134419.15;SE:chr16:18784823-18788063:18788159-18788981:-	-0.257028	SF3B1	RPS15A	NO	NA	NA
ENSG00000011114.15;AF:chr14:93263993-93293858:93294617:93263993-93332820:93333039:-	0.272799	SF3B1	BTBD7	NO	NA	NA
ENSG00000205352.11;A3:chr12:53442733-53443541:53442733-53443567:+	-0.331883	SF3B1	PRR13	NO	NA	NA
ENSG00000125743.10;AF:chr19:45688566-45691412:45691771:45688566-45691887:45691917:-	0.275584	SF3B1	SNRPD2	NO	NA	NA
ENSG00000160710.17;AF:chr1:154602626-154607992:154608186:154602626-154627954:154628004:-	0.129914	SF3B1	ADAR	NO	NA	NA
ENSG00000244513.7;AL:chr3:69014201-69016804:69017507:69014201-69029865:69030679:+	-0.253967	SF3B1	AC109587.1	NO	NA	NA
ENSG00000017427.17;AL:chr12:102402328:102402566-102419509:102417491:102418003-102419509:-	-0.131622	SF3B1	IGF1	NO	NA	NA
ENSG00000159023.21;AF:chr1:28893371:28893837-28987431:28914562:28914768-28987431:+	-0.114722	SF3B1	EPB41	NO	NA	NA
ENSG00000146083.12;AF:chr5:176532516-176535996:176536330:176532516-176537731:176538025:-	-0.164354	SF3B1	RNF44	NO	NA	NA
ENSG00000100138.15;SE:chr22:41680364-41688152:41688327-41688794:-	-0.11308	SF3B1	SNU13	NO	NA	NA
ENSG00000153310.19;AF:chr8:129970995-130016370:130016405:129970995-130016607:130016697:-	-0.189192	SF3B1	CYRIB	NO	NA	NA
ENSG00000113648.16;A5:chr5:135346057-135352946:135346057-135360497:-	0.215521	SF3B1	MACROH2A1	NO	NA	NA
ENSG00000109180.14;A5:chr4:48831433-48832620:48831253-48832620:+	-0.168162	SF3B1	OCIAD1	NO	NA	NA
ENSG00000124357.13;A5:chr2:71071827-71072641:71070839-71072641:+	0.103363	SF3B1	NAGK	NO	NA	NA
ENSG00000137106.18;AL:chr9:37432138-37432533:37432811:37432138-37436661:37436989:+	-0.133972	SF3B1	GRHPR	NO	NA	NA
ENSG00000124588.21;MX:chr6:3000085-3003669:3003789-3006468:3000085-3004495:3004651-3006468:+	0.189093	SF3B1	NQO2	NO	NA	NA
ENSG00000251136.9;AL:chr8:89717428:89717728-89722015:89721337:89721374-89722015:-	0.306573	SF3B1	AF117829.1	NO	NA	NA
ENSG00000175224.16;SE:chr11:46618375-46630045:46630100-46644279:+	-0.112187	SF3B1	ATG13	NO	NA	NA
ENSG00000179344.16;SE:chr6:32660249-32660859:32660882-32661347:-	-0.202709	SF3B1	HLA-DQB1	NO	NA	NA
ENSG00000100294.13;SE:chr22:43133486-43137081:43137298-43141162:-	0.104092	SF3B1	MCAT	NO	NA	NA
ENSG00000168488.18;A5:chr16:28836485-28836728:28836122-28836728:+	-0.130632	SF3B1	ATXN2L	NO	NA	NA
ENSG00000135469.13;AF:chr12:56266858:56267252-56267794:56267283:56267433-56267794:+	-0.174649	SF3B1	COQ10A	NO	NA	NA
ENSG00000122483.17;SE:chr1:93183495-93183978:93184146-93186345:+	-0.180627	SF3B1	CCDC18	NO	NA	NA
ENSG00000167578.18;AL:chr19:40786978-40792217:40792572:40786978-40796570:40796938:+	0.161864	SF3B1	RAB4B	NO	NA	NA
ENSG00000189067.13;AF:chr16:11556735-11586146:11586373:11556735-11586886:11586919:-	-0.289784	SF3B1	LITAF	NO	NA	NA
ENSG00000204628.12;AL:chr5:181236934:181237042-181239067:181238124:181238239-181239067:-	0.222901	SF3B1	RACK1	NO	NA	NA
ENSG00000105221.18;SE:chr19:40257054-40265222:40265351-40285181:-	-0.227894	SF3B1	AKT2	NO	NA	NA
ENSG00000230606.11;AF:chr2:97423272-97425878:97428263:97423272-97429217:97429786:-	-0.143628	SF3B1	AC092683.1	NO	NA	NA
ENSG00000211460.12;AF:chr2:121755545:121755845-121757240:121756171:121756691-121757240:+	-0.258204	SF3B1	TSN	NO	NA	NA
ENSG00000174775.17;AF:chr11:534375-535416:535538:534375-536853:537287:-	-0.415698	SF3B1	HRAS	NO	NA	NA
ENSG00000125447.18;RI:chr17:75239789:75240108-75240342:75241057:-	0.11231	SF3B1	GGA3	NO	NA	NA
ENSG00000176148.16;AF:chr11:33039572:33039792-33043750:33040015:33040206-33043750:+	0.275593	SF3B1	TCP11L1	NO	NA	NA
ENSG00000251136.9;A3:chr8:89722156-89724629:89722081-89724629:-	0.195628	SF3B1	AF117829.1	NO	NA	NA
ENSG00000101247.18;SE:chr20:13808902-13814418:13814515-13816463:+	-0.103985	SF3B1	NDUFAF5	NO	NA	NA
ENSG00000213648.11;A3:chr16:29463661-29464142:29463661-29464160:+	-0.178429	SF3B1	SULT1A4	NO	NA	NA
ENSG00000155957.18;SE:chr12:66138166-66138724:66138734-66145841:-	0.218986	SF3B1	TMBIM4	NO	NA	NA
ENSG00000163875.16;SE:chr1:37495918-37496707:37496736-37501804:-	0.26734	SF3B1	MEAF6	NO	NA	NA
ENSG00000180198.16;A5:chr1:28530615-28531803:28530573-28531803:+	0.134313	SF3B1	RCC1	NO	NA	NA
ENSG00000222041.11;AF:chr2:87487502:87487618-87521207:87516716:87517660-87521207:+	-0.267373	SF3B1	CYTOR	NO	NA	NA
ENSG00000066322.15;AF:chr1:43365623-43366268:43366587:43365623-43367915:43368007:-	-0.263393	SF3B1	ELOVL1	NO	NA	NA
ENSG00000101974.14;SE:chrX:139728962-139731651:139731755-139737916:-	0.116056	SF3B1	ATP11C	NO	NA	NA
ENSG00000253710.4;SE:chr13:52019143-52024586:52024937-52028319:+	-0.332196	SF3B1	ALG11	NO	NA	NA
ENSG00000245534.7;SE:chr15:60510533-60519966:60520269-60528580:+	-0.154873	SF3B1	RORA-AS1	NO	NA	NA
ENSG00000137700.18;A5:chr11:119029564-119030170:119029564-119030232:-	0.180579	SF3B1	SLC37A4	NO	NA	NA
ENSG00000116161.18;AF:chr1:174999163:174999689-175004614:175000213:175000599-175004614:+	0.119285	SF3B1	CACYBP	NO	NA	NA
ENSG00000075785.14;A3:chr3:128798069-128806372:128798069-128807543:+	0.327059	SF3B1	RAB7A	NO	NA	NA
ENSG00000140157.15;SE:chr15:22839174-22839655:22839790-22851639:+	0.268701	SF3B1	NIPA2	NO	NA	NA
ENSG00000258366.9;A5:chr20:63695650-63695778:63695480-63695778:+	-0.264643	SF3B1	RTEL1	NO	NA	NA
ENSG00000162521.19;AL:chr1:32672901-32679640:32680053:32672901-32680526:32680657:+	0.189457	SF3B1	RBBP4	NO	NA	NA
ENSG00000132581.10;AF:chr17:28655483-28661726:28661906:28655483-28662046:28662185:-	0.135437	SF3B1	SDF2	NO	NA	NA
ENSG00000168488.18;RI:chr16:28835278:28835399-28835546:28835758:+	0.278927	SF3B1	ATXN2L	NO	NA	NA
ENSG00000140398.14;RI:chr15:75354250:75354277-75354431:75354492:+	0.146082	SF3B1	NEIL1	NO	NA	NA
ENSG00000170476.16;A3:chr5:139389420-139389680:139388601-139389680:-	0.296543	SF3B1	MZB1	NO	NA	NA
ENSG00000149091.15;AF:chr11:46345434:46345585-46367291:46347572:46347820-46367291:+	0.29188	SF3B1	DGKZ	NO	NA	NA
ENSG00000136715.19;AF:chr2:128026298-128027092:128027293:128026298-128027940:128028120:-	0.166384	SF3B1	SAP130	NO	NA	NA
ENSG00000273061.1;AL:chr9:4676600:4676749-4679387:4678819:4679165-4679387:-	-0.147694	SF3B1	CDC37L1-DT	NO	NA	NA
ENSG00000075785.14;AL:chr3:128807671-128813327:128814796:128807671-128823718:128825942:+	0.173427	SF3B1	RAB7A	NO	NA	NA
ENSG00000133961.20;AF:chr14:73410068-73457629:73457938:73410068-73458493:73458577:-	-0.299519	SF3B1	NUMB	NO	NA	NA
ENSG00000248643.5;AL:chr11:66617057-66638559:66638653:66617057-66646027:66646467:+	0.357031	SF3B1	RBM14-RBM4	NO	NA	NA
ENSG00000147789.15;AL:chr8:144837507-144841355:144841579:144837507-144845979:144847509:+	-0.193357	SF3B1	ZNF7	NO	NA	NA
ENSG00000115504.15;SE:chr2:62979335-62987931:62988038-62990716:+	0.151982	SF3B1	EHBP1	NO	NA	NA
ENSG00000177000.13;AF:chr1:11803129-11804999:11805294:11803129-11805347:11805936:-	0.128965	SF3B1	MTHFR	NO	NA	NA
ENSG00000237036.5;AL:chr10:31307717:31308152-31318896:31316534:31318540-31318896:-	-0.323671	SF3B1	ZEB1-AS1	NO	NA	NA
ENSG00000145354.12;AF:chr4:102868992:102869187-102885216:102869336:102869512-102885216:+	-0.195273	SF3B1	CISD2	NO	NA	NA
ENSG00000148187.18;A5:chr9:122285946-122286039:122285287-122286039:+	0.108733	SF3B1	MRRF	NO	NA	NA
ENSG00000174744.14;A5:chr11:66337889-66338243:66337889-66338721:-	0.167465	SF3B1	BRMS1	NO	NA	NA
ENSG00000104881.16;AF:chr19:45398339-45404999:45405069:45398339-45406292:45406349:-	0.290083	SF3B1	PPP1R13L	NO	NA	NA
ENSG00000143575.15;RI:chr1:154273336:154273598-154273750:154273961:+	0.220196	SF3B1	HAX1	NO	NA	NA
ENSG00000123562.18;AF:chrX:103685260-103686631:103686709:103685260-103687989:103688064:-	0.103143	SF3B1	MORF4L2	NO	NA	NA
ENSG00000125347.14;AF:chr5:132489483-132490050:132490262:132489483-132490545:132490754:-	0.433524	SF3B1	IRF1	YES	NA	NA
ENSG00000196268.12;AL:chr19:21405856-21407473:21408799:21405856-21422913:21422949:+	-0.201516	SF3B1	ZNF493	NO	NA	NA
ENSG00000177697.19;SE:chr11:833026-834530:834591-836063:+	-0.123677	SF3B1	CD151	NO	NA	NA
ENSG00000214022.11;SE:chr7:150369868-150370760:150370884-150371228:+	0.120483	SF3B1	REPIN1	NO	NA	NA
ENSG00000137955.16;AF:chr1:75786228:75786274-75787497:75786703:75786965-75787497:+	-0.104013	SF3B1	RABGGTB	NO	NA	NA
ENSG00000132254.12;A3:chr11:6480463-6481231:6480068-6481231:-	0.121782	SF3B1	ARFIP2	NO	NA	NA
ENSG00000108312.15;AF:chr17:44218296-44219009:44219121:44218296-44220740:44220963:-	0.296097	SF3B1	UBTF	NO	NA	NA
ENSG00000175197.12;A3:chr12:57517595-57517706:57517424-57517706:-	0.209761	SF3B1	DDIT3	NO	NA	NA
ENSG00000145349.17;A5:chr4:113454515-113457291:113454515-113457335:-	0.194592	SF3B1	CAMK2D	NO	NA	NA
ENSG00000073584.20;A3:chr17:40632367-40635931:40631693-40635931:-	0.231509	SF3B1	SMARCE1	NO	NA	NA
ENSG00000217128.12;SE:chr5:131709272-131710578:131710661-131716565:-	0.295604	SF3B1	FNIP1	NO	NA	NA
ENSG00000172349.17;SE:chr15:81293037-81295332:81295520-81296928:+	0.133744	SF3B1	IL16	NO	NA	NA
ENSG00000188243.12;MX:chr13:75526639-75530114:75530266-75537664:75526639-75530311:75530408-75537664:-	0.139029	SF3B1	COMMD6	NO	NA	NA
ENSG00000166938.13;AF:chr15:66293596:66293735-66294988:66294059:66294448-66294988:+	0.122774	SF3B1	DIS3L	NO	NA	NA
ENSG00000213523.10;A3:chr5:140557332-140557428:140557272-140557428:-	-0.13276	SF3B1	SRA1	NO	NA	NA
ENSG00000066855.16;AL:chr8:65719481-65725316:65725600:65719481-65770947:65771261:+	-0.123469	SF3B1	MTFR1	NO	NA	NA
ENSG00000101901.12;AF:chrX:111681189:111681299-111682132:111681663:111681826-111682132:+	-0.268105	SF3B1	ALG13	NO	NA	NA
ENSG00000101104.13;A3:chr20:44932432-44933057:44932432-44933072:+	0.473779	SF3B1	PABPC1L	NO	NA	NA
ENSG00000119185.13;SE:chr2:9418732-9419990:9420100-9423373:-	-0.104843	SF3B1	ITGB1BP1	NO	NA	NA
ENSG00000156976.17;SE:chr3:186787882-186788310:186788416-186789125:+	-0.132545	SF3B1	EIF4A2	NO	NA	NA
ENSG00000119185.13;AF:chr2:9420100-9422479:9423229:9420100-9423373:9423480:-	0.284945	SF3B1	ITGB1BP1	NO	NA	NA
ENSG00000140474.14;AF:chr15:74842420-74842535:74842676:74842420-74843004:74843211:-	0.296028	SF3B1	ULK3	NO	NA	NA
ENSG00000151176.8;SE:chr12:113384265-113384851:113384946-113385212:+	0.110526	SF3B1	PLBD2	NO	NA	NA
ENSG00000156976.17;SE:chr3:186784696-186784962:186785101-186785883:+	0.136797	SF3B1	EIF4A2	NO	NA	NA
ENSG00000258366.9;A5:chr20:63658466-63659233:63658459-63659233:+	-0.111364	SF3B1	RTEL1	NO	NA	NA
ENSG00000066322.15;AF:chr1:43365623-43367486:43367738:43365623-43367915:43368007:-	-0.16654	SF3B1	ELOVL1	NO	NA	NA
ENSG00000197343.11;AL:chr7:99560695-99561888:99562398:99560695-99572245:99576453:+	-0.108039	SF3B1	ZNF655	NO	NA	NA
ENSG00000095787.23;AF:chr10:28532768:28533007-28533998:28533506:28533582-28533998:+	-0.239904	SF3B1	WAC	NO	NA	NA
ENSG00000120948.18;AF:chr1:11012424:11012480-11013716:11012653:11012743-11013716:+	0.473335	SF3B1	TARDBP	NO	NA	NA
ENSG00000133706.19;SE:chr5:146172774-146177547:146177665-146182488:-	-0.12373	SF3B1	LARS1	NO	NA	NA
ENSG00000123240.17;AF:chr10:13099449:13099958-13108138:13100163:13100302-13108138:+	-0.2947	SF3B1	OPTN	NO	NA	NA
ENSG00000157216.15;SE:chr1:54257186-54258069:54258149-54281438:-	0.170523	SF3B1	SSBP3	NO	NA	NA
ENSG00000005302.19;AF:chrX:11758203:11758365-11759793:11759604:11759712-11759793:+	0.259732	SF3B1	MSL3	NO	NA	NA
ENSG00000103121.9;MX:chr16:80981877-80988540:80988596-80997314:80981877-80996923:80997020-80997314:-	0.192963	SF3B1	CMC2	NO	NA	NA
ENSG00000109775.11;AL:chr4:185399537:185400478-185403494:185402262:185402344-185403494:-	0.114522	SF3B1	UFSP2	NO	NA	NA
ENSG00000132286.12;A5:chr11:6481852-6482045:6481555-6482045:+	-0.34464	SF3B1	TIMM10B	NO	NA	NA
ENSG00000004455.17;SE:chr1:33010833-33012074:33012122-33013207:-	-0.426729	SF3B1	AK2	NO	NA	NA
ENSG00000109107.14;SE:chr17:28575544-28575965:28576020-28576801:-	-0.102604	SF3B1	ALDOC	NO	NA	NA
ENSG00000159753.14;SE:chr16:67656645-67656834:67656881-67657239:+	-0.182752	SF3B1	CARMIL2	NO	NA	NA
ENSG00000215021.9;RI:chr12:6970196:6970280-6970417:6970645:-	0.105519	SF3B1	PHB2	NO	NA	NA
ENSG00000104756.16;AF:chr8:25446250-25450380:25450611:25446250-25458199:25458476:-	-0.172506	SF3B1	KCTD9	NO	NA	NA
ENSG00000237651.6;SE:chr2:61158012-61159318:61159439-61162842:+	-0.124993	SF3B1	C2orf74	NO	NA	NA
ENSG00000139178.11;AL:chr12:7096391:7097163-7099686:7098296:7098412-7099686:-	0.231523	SF3B1	C1RL	NO	NA	NA
ENSG00000143933.19;SE:chr2:47170764-47172414:47172459-47176441:-	-0.113254	SF3B1	CALM2	NO	NA	NA
ENSG00000160961.12;AF:chr19:14689801:14689920-14693451:14690106:14690150-14693451:+	-0.104605	SF3B1	ZNF333	NO	NA	NA
ENSG00000182196.13;RI:chr12:122981129:122981299-122981571:122981879:+	-0.121788	SF3B1	ARL6IP4	NO	NA	NA
ENSG00000105856.14;AF:chr7:107168990:107169027-107174448:107169773:107170130-107174448:+	-0.315083	SF3B1	HBP1	NO	NA	NA
ENSG00000116161.18;AF:chr1:174999163:174999689-175004614:174999945:175000195-175004614:+	0.293081	SF3B1	CACYBP	NO	NA	NA
ENSG00000078304.19;AL:chr14:101786183-101797211:101797701:101786183-101824014:101824229:+	0.148585	SF3B1	PPP2R5C	NO	NA	NA
ENSG00000161533.12;SE:chr17:75957566-75973625:75973785-75978534:-	0.120176	SF3B1	ACOX1	NO	NA	NA
ENSG00000048162.21;AL:chr5:176384643:176385327-176386840:176385941:176386019-176386840:-	0.162098	SF3B1	NOP16	NO	NA	NA
ENSG00000122545.20;SE:chr7:35801270-35832798:35832900-35863552:+	-0.255287	SF3B1	SEPTIN7	NO	NA	NA
ENSG00000075826.17;SE:chr10:100496431-100497135:100497280-100497667:-	0.145421	SF3B1	SEC31B	NO	NA	NA
ENSG00000143889.16;SE:chr2:38577532-38577920:38578002-38581913:-	0.164512	SF3B1	HNRNPLL	NO	NA	NA
ENSG00000213516.10;SE:chr1:88984066-88988252:88988351-88992585:-	0.101848	SF3B1	RBMXL1	NO	NA	NA
ENSG00000100413.17;SE:chr22:41532157-41532659:41532745-41540699:-	0.115874	SF3B1	POLR3H	NO	NA	NA
ENSG00000105053.11;SE:chr19:49994919-49995191:49995275-50000790:-	0.165855	SF3B1	VRK3	NO	NA	NA
ENSG00000112739.17;A5:chr6:4062760-4063074:4062633-4063074:+	-0.100069	SF3B1	PRPF4B	NO	NA	NA
ENSG00000172530.20;SE:chr16:88038011-88065267:88065332-88072069:+	-0.126707	SF3B1	BANP	NO	NA	NA
ENSG00000142856.17;AL:chr1:63440800:63441103-63453918:63451725:63452064-63453918:-	-0.183311	SF3B1	ITGB3BP	NO	NA	NA
ENSG00000106415.13;AF:chr7:8070075:8071131-8086193:8084639:8085017-8086193:+	-0.115526	SF3B1	GLCCI1	NO	NA	NA
ENSG00000177853.14;MX:chr10:96133648-96151416:96151566-96155924:96133648-96155326:96155398-96155924:+	-0.324582	SF3B1	ZNF518A	NO	NA	NA
ENSG00000055950.16;SE:chr10:100983817-100984034:100984074-100986749:-	-0.101953	SF3B1	MRPL43	NO	NA	NA
ENSG00000197530.12;AF:chr1:1615454:1615633-1616508:1615968:1616100-1616508:+	0.264853	SF3B1	MIB2	NO	NA	NA
ENSG00000130396.20;SE:chr6:167952187-167954461:167954493-167962433:+	0.163293	SF3B1	AFDN	NO	NA	NA
ENSG00000181027.11;SE:chr19:46748088-46748515:46748884-46755412:+	-0.314039	SF3B1	FKRP	NO	NA	NA
ENSG00000147679.12;AL:chr8:116766791-116770192:116770849:116766791-116848888:116849463:+	0.194533	SF3B1	UTP23	NO	NA	NA
ENSG00000132600.17;SE:chr16:68312176-68315897:68316074-68321426:+	-0.122424	SF3B1	PRMT7	NO	NA	NA
ENSG00000177731.16;RI:chr17:18245555:18245660-18245744:18246062:-	0.121845	SF3B1	FLII	NO	NA	NA
ENSG00000143321.19;AF:chr1:156745373-156747435:156747471:156745373-156751343:156751496:-	-0.322301	SF3B1	HDGF	NO	NA	NA
ENSG00000136828.19;A5:chr9:126915012-126962225:126914975-126962225:+	0.125097	SF3B1	RALGPS1	NO	NA	NA
ENSG00000154642.11;AL:chr21:17793247:17793581-17796582:17795208:17795270-17796582:-	0.146458	SF3B1	C21orf91	NO	NA	NA
ENSG00000088808.18;SE:chr14:103736202-103737694:103737860-103738679:-	0.119292	SF3B1	PPP1R13B	NO	NA	NA
ENSG00000185838.14;AF:chr22:19854539-19854682:19854806:19854539-19854820:19854939:-	-0.248211	SF3B1	GNB1L	NO	NA	NA
ENSG00000274114.2;A3:chr17:6658914-6659862:6658914-6659925:+	0.150708	SF3B1	ALOX15P1	NO	NA	NA
ENSG00000113648.16;MX:chr5:135346057-135350823:135350913-135360497:135346057-135352946:135353045-135360497:-	0.121664	SF3B1	MACROH2A1	NO	NA	NA
ENSG00000110721.12;A5:chr11:68054047-68061493:68054047-68061600:-	0.217601	SF3B1	CHKA	NO	NA	NA
ENSG00000120963.12;AL:chr8:101177878:101178387-101199990:101197052:101199239-101199990:-	-0.135794	SF3B1	ZNF706	NO	NA	NA
ENSG00000122512.16;SE:chr7:6004058-6005892:6006026-6008997:-	-0.141596	SF3B1	PMS2	NO	NA	NA
ENSG00000143549.21;AF:chr1:154176248-154176854:154176952:154176248-154182988:154183189:-	-0.305574	SF3B1	TPM3	NO	NA	NA
ENSG00000160752.15;A3:chr1:155308965-155310043:155308965-155310064:+	-0.147121	SF3B1	FDPS	NO	NA	NA
ENSG00000177311.11;AF:chr3:141386875:141386937-141403927:141387647:141387887-141403927:+	-0.236887	SF3B1	ZBTB38	NO	NA	NA
ENSG00000148803.12;AF:chr10:133357255-133357657:133357737:133357255-133357923:133358025:-	-0.180456	SF3B1	FUOM	NO	NA	NA
ENSG00000204628.12;AF:chr5:181242345-181242554:181243370:181242345-181243692:181243880:-	-0.191128	SF3B1	RACK1	NO	NA	NA
ENSG00000205352.11;A3:chr12:53442733-53443567:53442733-53443679:+	0.296105	SF3B1	PRR13	NO	NA	NA
ENSG00000213648.11;SE:chr16:29461950-29462693:29462785-29463345:+	0.120498	SF3B1	SULT1A4	NO	NA	NA
ENSG00000089094.19;AF:chr12:121534590-121536020:121536128:121534590-121537310:121537616:-	-0.219489	SF3B1	KDM2B	NO	NA	NA
ENSG00000123562.18;AF:chrX:103685260-103686631:103686699:103685260-103687989:103688064:-	0.105257	SF3B1	MORF4L2	NO	NA	NA
ENSG00000235437.8;SE:chrX:63399903-63509944:63510079-63516910:-	0.204075	SF3B1	LINC01278	NO	NA	NA
ENSG00000157593.19;MX:chr6:44255644-44256342:44256496-44257400:44255644-44256685:44256878-44257400:-	-0.352451	SF3B1	SLC35B2	NO	NA	NA
ENSG00000036257.13;AF:chr2:224557856-224569689:224569825:224557856-224584944:224585363:-	0.509518	SF3B1	CUL3	NO	NA	NA
ENSG00000147789.15;AF:chr8:144827579:144827609-144829043:144827618:144827812-144829043:+	-0.153844	SF3B1	ZNF7	NO	NA	NA
ENSG00000083845.9;AF:chr19:58386507:58386622-58388137:58387264:58387339-58388137:+	0.130998	SF3B1	RPS5	NO	NA	NA
ENSG00000004455.17;SE:chr1:33024567-33031544:33031661-33036736:-	0.140373	SF3B1	AK2	NO	NA	NA
ENSG00000087460.26;AF:chr20:58889124:58889549-58895612:58891981:58892209-58895612:+	0.225746	SF3B1	GNAS	NO	NA	NA
ENSG00000203666.12;AL:chr1:245083688-245086733:245086961:245083688-245091027:245091806:+	0.116084	SF3B1	EFCAB2	NO	NA	NA
ENSG00000111641.12;A3:chr12:6566336-6566529:6566324-6566529:-	-0.120444	SF3B1	NOP2	NO	NA	NA
ENSG00000105393.16;SE:chr19:17271655-17273904:17274024-17276495:+	0.109406	SF3B1	BABAM1	NO	NA	NA
ENSG00000196295.12;SE:chr7:30550781-30552100:30552179-30561466:-	-0.105412	SF3B1	GARS1-DT	NO	NA	NA
[truncated: 2,047 more rows]

## Sheet: S3
Table 3. AS types of events identified in 16 comparisons
	Direction	AF	SE	AL	A5	A3	RI	MX	Total	Grand Total
t(14;16)	dPSI>0.1	106	70	50	30	19	14	7	296	587
		0.358	0.236	0.169	0.101	0.064	0.047	0.023
	dPSI<-0.1	113	58	37	29	25	19	10	291
		0.388	0.2	0.127	0.107	0.086	0.065	0.034
t(11;14)	dPSI>0.1	64	24	35	13	2	6	5	149	366
		0.429	0.161	0.235	0.082	0.013	0.038	0.031
	dPSI<-0.1	76	69	21	22	12	14	3	217
		0.35	0.318	0.097	0.101	0.055	0.064	0.014
t(4;14)	dPSI>0.1	66	23	25	10	11	1	4	140	256
		0.471	0.164	0.178	0.071	0.078	0.007	0.028
	dPSI<-0.1	48	25	16	9	9	8	1	116
		0.414	0.216	0.138	0.077	0.077	0.069	0.009
t(4;14)+DIS3	dPSI>0.1	113 (43.4%)	49 (18.8%)	32 (12.3%)	24 (9.2%)	26 (10.0%)	12 (4.6%)	4 (1.5%)	260	501
	dPSI<-0.1	92 (41.6%)	53 (24.0%)	29 (13.1%)	19 (8.6%)	18 (8.1%)	6 (2.7%)	4 (1.8%)	221
DIS3	dPSI>0.1	37 (56.9%)	9 (13.8%)	13 (20.0%)	1 (1.5%)	2 (3.1%)	3 (4.6%)	0 (0%)	65	114
	dPSI<-0.1	21 (42.9%)	9 (18.4%)	9 (18.4%)	7 (14.3%)	2 (4.1%)	1 (2.0%)	0 (0%)	49
DIS3-BI	dPSI>0.1	111 (50.7%)	31 (14.2%)	36 (16.4%)	11 (50.2%)	14 (63.9%)	10 (45.7%)	6 (2.7%)	219	404
	dPSI<-0.1	73 (39.5%)	35 (18.9%)	30 (16.2%)	22 (11.9%)	14 (7.6%)	8 (4.3%)	3 (1.6%)	185
TENT5C	dPSI>0.1	9 (47.4%)	2 (10.5%)	5 (26.3%)	1 (5.3%)	1 (5.3%)	1 (5.3%)	0 (0%)	19	35
	dPSI<-0.1	11 (31.4%)	1 (2.9%)	3 (8.6%)	0 (0%)	1 (2.9%)	0 (0%)	0 (0%)	16
TENT5C_BI	dPSI>0.1	32 (38%)	23 (27%)	14 (17%)	8 (10%)	6 (7%)	3 (4%)	1 (1%)	84	167
	dPSI<-0.1	44 (53%)	10 (12%)	12 (14%)	7 (8%)	4 (5%)	4 (5%)	3 (4%)	83
TP53	dPSI>0.1	7(29.2%)	5 (20.8%)	7 (29.2%)	1 (4.2%)	2 (8.3%)	2 (8.3%)	0 (0%)	24	56
	dPSI<-0.1	15 (46.9%)	6 (18.8%)	8 (25.0%)	1 (3.1%)	0 (0%)	2 (6.2%)	0 (0%)	32
TP53_BI	dPSI>0.1	11 (20%)	14 (25%)	12 (21%)	10 (18%)	5 (9%)	4 (7%)	1 (2%)	57	100
	dPSI<-0.1	19 (44%)	11 (26%)	5 (12%)	3 (7%)	3 (7%)	1 (2%)	1 (2%)	43
SF3B1	dPSI>0.1	71 (30%)	67 (29%)	22 (10%)	21 (9%)	24 (10%)	18 (8%)	8 (3%)	231	477
	dPSI<-0.1	96 (39%)	77 (31%)	25 (10%)	16 (7%)	18 (7%)	7 (3%)	7 (3%)	246
SF3B1_HOT	dPSI>0.1	122 (36%)	77 (23%)	35 (10%)	34 (10%)	45 (13%)	13 (4%)	14 (4%)	340	862
	dPSI<-0.1	165 (32%)	107 (20%)	60 (11%)	54 (10%)	75 (14%)	50 (10%)	11 (2%)	522
KRAS	dPSI>0.1	1 (100%)	0 (0%)	0 (0%)	0 (0%)	0 (0%)	0 (0%)	0 (0%)	1	2
	dPSI<-0.1	0 (0%)	0 (0%)	1 (100%)	0 (0%)	0 (0%)	0 (0%)	0 (0%)	1
NRAS	dPSI>0.1	2 (28.6%)	1 (14.3%)	3 (42.9%)	1 (14.3%)	0 (0%)	0 (0%)	0 (0%)	7	15
BRAF	dPSI<-0.1	7 (87.5%)	0 (0%)	0 (0%)	0 (0%)	1 (12.5%)	0 (0%)	0 (0%)	8
BRAF	dPSI>0.1	6 (42.9%)	1 (7.1%)	5 (35.7%)	0 (0%)	2 (14.3%)	0 (0%)	0 (0%)	14	23
	dPSI<-0.1	3 (33.3%)	2 (22.2%)	1 (11.1%)	1 (11.1%)	0 (0%)	1 (11.1%)	1 (11.1%)	9
Hyperdiploid	dPSI>0.1	11 (22.4%)	17 (34.7%)	10 (20.4%)	4 (8.2%)	4 (8.2%)	2 (4.1%)	1 (2.0%)	49	96
	dPSI<-0.1	27 (57.4%)	7 (14.9%)	9 (19.1%)	1 (2.1%)	1 (2.1%)	1 (2.1%)	1 (2.1%)	47

## Sheet: S4
Table 4. Events that are significantly associated with prognosis
Descriptions: samples within each comparison are divided into two groups based on the mean PSI, namely <mean and >mean group. If dPSI>0, then 'treat' group is the <mean group, else, 'treat' group is the >mean group.
Column name Descriptions: Uni_Context_HR: hazard ratio of <treat vs control> in uni-variate analysis; Multi_Context_HR: hazard ratio of <treat vs control> in multi-variate analysis;
Column name Descriptions: Uni_MMRF_HR: hazard ratio of <treat vs all_other_NDMM_MMRF_samples> in uni-variate analysis; Multi_Context_HR: hazard ratio of <treat vs all_other_NDMM_MMRF_samples> in multi-variate analysis;
event	dpsi	Uni_MMRF_HR	Uni_MMRF_Pval	Multi_MMRF_HR	Multi_MMRF_Pval	Uni_Context_HR	Uni_Context_Pval	Multi_Context_HR	Multi_Context_Pval	N(Treat)	N(Control)	Survival_type	Group
ENSG00000003402.20;AF:chr2:201116239:201116481-201129729:201116837:201116967-201129729:+	0.109645	1.37136	0.001865	1.26425	0.035131	0.909116	0.757423	0.912177	0.782441	32	32	PFS	DIS3
ENSG00000005893.16;AL:chrX:120427827:120428626-120441730:120436494:120439293-120441730:-	0.112396	1.41185	0.000676233	1.31271	0.0142833	1.19791	0.560244	1.14805	0.680666	36	28	PFS	DIS3
ENSG00000015153.15;AL:chr12:42161699:42161765-42237599:42231224:42235997-42237599:-	0.124582	1.364	0.00169789	1.29314	0.021357	0.900563	0.738878	0.899877	0.775594	35	29	PFS	DIS3
ENSG00000023572.10;AF:chr1:193101204-193105264:193105433:193101204-193105517:193106114:-	0.132084	1.42609	0.000279522	1.30792	0.0128135	1.48248	0.220035	1.4569	0.299995	36	28	PFS	DIS3
ENSG00000059377.18;AL:chr7:139787426-139789264:139789622:139787426-139797210:139797484:+	-0.127711	1.35985	0.00211123	1.27267	0.0274524	0.894772	0.719437	0.774422	0.488212	33	31	PFS	DIS3
ENSG00000064601.19;A5:chr20:45891425-45891569:45891379-45891569:+	-0.118944	1.37848	0.00295338	1.3344	0.0152584	0.86184	0.642838	1.02369	0.947841	31	33	PFS	DIS3
ENSG00000067221.14;SE:chr15:73984130-73984659:73984871-73985318:-	0.105376	1.41776	0.000390353	1.34622	0.00514802	1.3784	0.309598	1.42826	0.289634	39	25	PFS	DIS3
ENSG00000089094.19;A3:chr12:121443793-121444012:121443030-121444012:-	0.1033	0.785179	0.312959	0.746586	0.242902	0.253526	0.0920924	0.197652	0.0492051	30	34	OS	DIS3
ENSG00000089094.19;A3:chr12:121443793-121444012:121443030-121444012:-	0.1033	1.41892	0.000889417	1.32604	0.0142399	1.12849	0.695623	1.06853	0.847646	30	34	PFS	DIS3
ENSG00000089820.16;AF:chrX:153921809-153926136:153926260:153921809-153926590:153926757:-	0.135454	1.36196	0.00361131	1.23934	0.0652168	0.783065	0.43405	0.648076	0.20215	28	36	PFS	DIS3
ENSG00000093010.14;AL:chr22:19964299-19967164:19967694:19964299-19968536:19968998:+	-0.128492	1.36595	0.0011732	1.26787	0.0233561	0.966529	0.915546	0.898027	0.759687	36	28	PFS	DIS3
ENSG00000096746.17;A5:chr10:68332216-68337199:68331854-68337199:+	-0.123721	1.45353	0.000315199	1.34461	0.00896803	1.33649	0.346665	1.23254	0.562587	29	35	PFS	DIS3
ENSG00000096746.17;RI:chr10:68337199:68337333-68338503:68338687:+	-0.123721	1.45353	0.000315199	1.34461	0.00896803	1.33649	0.346665	1.23254	0.562587	29	35	PFS	DIS3
ENSG00000100209.11;AF:chr22:28742055:28742331-28743882:28742679:28742728-28743882:+	0.101794	1.43273	0.000316971	1.39118	0.003284	1.38946	0.293787	1.63135	0.161172	34	30	PFS	DIS3
ENSG00000100209.11;AF:chr22:28742055:28742331-28743882:28742701:28742728-28743882:+	0.108319	1.39768	0.000706112	1.33503	0.00700219	1.19438	0.569774	1.2146	0.557768	38	26	PFS	DIS3
ENSG00000105085.11;AF:chr19:16578409-16627872:16628204:16578409-16628522:16629062:-	0.133991	1.47594	0.000138799	1.40452	0.00237128	1.58787	0.137006	1.59325	0.194927	31	33	PFS	DIS3
ENSG00000106344.8;SE:chr7:128324694-128325818:128325891-128330819:-	0.15216	1.33166	0.00286376	1.28294	0.0214338	0.800632	0.48437	1.17454	0.716614	43	21	PFS	DIS3
ENSG00000106948.17;AF:chr9:114381446-114387860:114387982:114381446-114394357:114394405:-	-0.114136	1.45695	0.000933378	1.35208	0.0117314	1.10203	0.765963	0.888614	0.757073	20	44	PFS	DIS3
ENSG00000107614.22;AF:chr10:17174660-17201281:17201428:17174660-17201571:17201672:-	-0.109928	1.36142	0.00290289	1.26349	0.0363083	0.821403	0.524875	0.678082	0.260157	34	30	PFS	DIS3
ENSG00000108312.15;AF:chr17:44218296-44219009:44219121:44218296-44220740:44220963:-	-0.119206	1.43707	0.000215042	1.35898	0.003972	1.49105	0.214238	1.33735	0.406226	35	29	PFS	DIS3
ENSG00000109971.14;AF:chr11:123061329-123061913:123062032:123061329-123062750:123063230:-	0.119944	1.34201	0.00311238	1.27961	0.02117	0.784968	0.433865	0.706114	0.309116	39	25	PFS	DIS3
ENSG00000110315.7;AF:chr11:10534205-10540753:10540906:10534205-10541122:10541190:-	-0.138558	1.5895	1.15542e-05	1.55307	0.000156329	2.88532	0.00170222	3.62925	0.000509093	32	32	PFS	DIS3
ENSG00000110931.19;AL:chr12:121237691:121240542-121244573:121243588:121244129-121244573:-	-0.104973	1.04548	0.812554	1.06714	0.748787	7.79339	0.0521373	8.32998	0.044079	39	25	OS	DIS3
ENSG00000110931.19;AL:chr12:121237691:121240542-121244573:121243588:121244129-121244573:-	-0.104973	1.43456	0.000167755	1.36444	0.00332137	1.55532	0.180624	1.74789	0.122778	39	25	PFS	DIS3
ENSG00000111679.17;AF:chr12:6946577:6946739-6951609:6951435:6951520-6951609:+	0.199275	1.48101	0.0002524	1.37748	0.00718092	1.42172	0.259943	1.52295	0.248517	28	36	PFS	DIS3
ENSG00000116871.15;AF:chr1:36155579:36155733-36170971:36155965:36156463-36170971:+	-0.171055	1.51075	4.41412e-05	1.45393	0.000615366	1.96748	0.0334104	2.08295	0.0428104	33	31	PFS	DIS3
ENSG00000116871.15;AF:chr1:36155579:36155733-36170971:36156198:36156463-36170971:+	-0.132478	1.46909	0.000379592	1.40217	0.00401881	1.29158	0.410708	1.28257	0.475452	25	39	PFS	DIS3
ENSG00000117616.18;AF:chr1:25247029-25247309:25247457:25247029-25337040:25338165:-	0.122577	1.4758	0.000166101	1.36105	0.00849842	1.54754	0.162559	1.68406	0.138371	30	34	PFS	DIS3
ENSG00000117616.18;SE:chr1:25244224-25244454:25244498-25245150:-	-0.122577	1.4758	0.000166101	1.36105	0.00849842	1.54754	0.162559	1.68406	0.138371	30	34	PFS	DIS3
ENSG00000119335.17;AF:chr9:128685083:128685213-128691170:128690250:128690727-128691170:+	-0.149127	1.33995	0.00324107	1.27831	0.0249747	0.825575	0.535548	0.845338	0.614987	37	27	PFS	DIS3
ENSG00000120694.20;AF:chr13:31158863-31161476:31161904:31158863-31161982:31162388:-	-0.133796	1.42337	0.000195486	1.33552	0.00681075	1.59689	0.166567	2.09439	0.0464991	39	25	PFS	DIS3
ENSG00000120833.14;AF:chr12:93569814:93570198-93572685:93570980:93571216-93572685:+	-0.136134	1.47389	0.000292391	1.37565	0.00580432	1.3938	0.287074	1.4215	0.308828	28	36	PFS	DIS3
ENSG00000122034.16;A5:chr13:27425165-27427092:27424853-27427092:+	-0.10204	1.43466	0.000303479	1.37809	0.00431758	1.38051	0.303536	1.40931	0.314362	32	32	PFS	DIS3
ENSG00000123352.18;AL:chr12:49461037-49462275:49463625:49461037-49484590:49484673:+	-0.146931	1.47095	0.000262826	1.34151	0.0104096	1.3907	0.292115	1.28824	0.472863	27	37	PFS	DIS3
ENSG00000123352.18;SE:chr12:49367587-49371228:49371290-49441730:+	-0.124742	1.41877	0.0009021	1.30646	0.0192917	1.06505	0.838743	0.979882	0.951315	28	36	PFS	DIS3
ENSG00000125347.14;AF:chr5:132489483-132490050:132490262:132489483-132490545:132490754:-	0.144159	1.3591	0.00300354	1.2546	0.051919	0.842932	0.580068	0.973718	0.940574	33	31	PFS	DIS3
ENSG00000125347.14;AF:chr5:132489483-132490050:132490262:132489483-132490545:132490773:-	0.105613	1.3591	0.00300354	1.2546	0.051919	0.842932	0.580068	0.973718	0.940574	33	31	PFS	DIS3
ENSG00000129187.14;SE:chr4:182915575-182916419:182916539-182916673:-	-0.101372	1.44213	0.000258227	1.32347	0.0102155	1.46541	0.225913	1.46889	0.264917	35	29	PFS	DIS3
ENSG00000129657.16;AF:chr17:77140932:77141054-77142646:77141070:77141107-77142646:+	0.14013	1.43142	0.000285141	1.34915	0.00446287	1.3608	0.330574	1.27566	0.487282	34	30	PFS	DIS3
ENSG00000129657.16;AF:chr17:77140932:77141054-77142646:77141386:77141721-77142646:+	0.17549	1.43403	0.000309786	1.34738	0.00511303	1.33081	0.362196	1.21382	0.574818	32	32	PFS	DIS3
ENSG00000129667.13;AF:chr17:76487909-76493062:76493202:76487909-76500936:76501360:-	-0.120025	1.36515	0.00188068	1.26705	0.0296245	0.894007	0.717378	0.72176	0.34521	32	32	PFS	DIS3
ENSG00000131943.18;AF:chr19:29708423-29715125:29715261:29708423-29715563:29715789:-	0.305966	1.46515	0.000493697	1.34044	0.0133194	1.25045	0.480079	1.06981	0.857062	25	39	PFS	DIS3
ENSG00000132341.12;SE:chr12:130872126-130872584:130872617-130872836:+	0.135654	1.4008	0.000183738	1.32112	0.00414157	1.7977	0.149542	2.14329	0.0962772	51	13	PFS	DIS3
ENSG00000133063.16;AF:chr1:203240658-203260802:203260862:203240658-203268518:203272809:-	0.159141	1.40061	0.00051145	1.31046	0.010731	1.20713	0.555841	1.24334	0.538859	38	26	PFS	DIS3
ENSG00000133063.16;SE:chr1:203222325-203223135:203223259-203223495:-	0.1588	1.36386	0.00192739	1.31942	0.0129285	0.904919	0.746557	1.10635	0.775701	34	30	PFS	DIS3
ENSG00000133063.16;SE:chr1:203228562-203230015:203230084-203240463:-	0.159141	1.40061	0.00051145	1.31046	0.010731	1.20713	0.555841	1.24334	0.538859	38	26	PFS	DIS3
ENSG00000134369.15;AF:chr1:201739317:201739844-201780421:201739868:201740076-201780421:+	-0.101204	1.38939	0.00210217	1.31926	0.0194597	0.884787	0.698202	0.852125	0.680542	26	38	PFS	DIS3
ENSG00000136104.21;AF:chr13:50909747:50910140-50927407:50910274:50913131-50927407:+	0.12169	1.39789	0.00120813	1.29468	0.0218527	1.00199	0.994861	0.918663	0.817151	32	32	PFS	DIS3
ENSG00000136104.21;AF:chr13:50909780:50910140-50927407:50910274:50913131-50927407:+	0.111787	0.795698	0.348722	0.768853	0.304503	0.2811	0.122322	0.111893	0.013963	29	35	OS	DIS3
ENSG00000136104.21;AF:chr13:50909780:50910140-50927407:50910274:50913131-50927407:+	0.111787	1.36703	0.0036928	1.25534	0.0472901	0.808213	0.49969	0.58326	0.158447	29	35	PFS	DIS3
ENSG00000136104.21;AF:chr13:50909813:50910140-50927407:50910274:50913131-50927407:+	0.12096	1.34132	0.00430267	1.25774	0.0388324	0.746343	0.349603	0.695499	0.294042	31	33	PFS	DIS3
ENSG00000137842.7;AF:chr15:43133843:43133982-43135512:43134282:43134368-43135512:+	0.102334	1.47437	0.000285501	1.35107	0.00871159	1.35676	0.324404	1.26273	0.521652	27	37	PFS	DIS3
ENSG00000138757.14;SE:chr4:75662049-75724056:75724176-75724276:-	-0.135245	1.45465	0.000267277	1.3518	0.00628101	1.39911	0.280315	1.3223	0.433818	33	31	PFS	DIS3
ENSG00000140043.11;A5:chr14:73852004-73858816:73851943-73858816:+	0.176066	1.34065	0.00259217	1.24826	0.0339476	0.814656	0.512932	0.624625	0.213259	39	25	PFS	DIS3
ENSG00000142541.17;A5:chr19:49490090-49490232:49489912-49490232:+	-0.124973	1.40212	0.000564365	1.2899	0.0210358	1.21426	0.538905	1.31676	0.47172	35	29	PFS	DIS3
ENSG00000143321.19;AF:chr1:156745373-156751343:156751496:156745373-156752229:156752448:-	0.11333	1.5285	6.38579e-05	1.42748	0.00262959	1.83008	0.0524396	2.00567	0.0445089	29	35	PFS	DIS3
ENSG00000143458.12;SE:chr1:151070934-151073039:151073157-151088190:+	-0.126958	1.49957	0.000172302	1.36518	0.00818894	1.54541	0.163195	1.44626	0.316583	26	38	PFS	DIS3
ENSG00000148356.14;A3:chr9:127494662-127494997:127494662-127495217:+	-0.108306	1.40868	0.000552685	1.37518	0.00334258	1.2461	0.482165	1.423	0.314954	34	30	PFS	DIS3
ENSG00000148358.19;SE:chr9:130107539-130110370:130110426-130124915:+	0.124111	1.40535	0.00117668	1.28637	0.0266331	1.0454	0.885722	0.877058	0.725639	30	34	PFS	DIS3
ENSG00000148444.16;AF:chr10:22316441:22316556-22317884:22316735:22316967-22317884:+	0.139609	1.42749	0.000360846	1.28457	0.0246919	1.30633	0.393861	1.27525	0.509148	32	32	PFS	DIS3
ENSG00000151422.13;SE:chr5:108748000-108768093:108768238-108798124:+	0.191383	1.42322	0.000617076	1.34992	0.00901826	1.19002	0.575022	1.31033	0.421861	33	31	PFS	DIS3
ENSG00000151702.17;AF:chr11:128692982:128693143-128758115:128694072:128694276-128758115:+	0.140445	1.41911	0.000579421	1.34862	0.0100343	1.23222	0.502186	1.64313	0.19123	35	29	PFS	DIS3
ENSG00000156482.11;AF:chr8:98045399-98045508:98045546:98045399-98045715:98046469:-	0.167328	1.47956	0.000128237	1.3873	0.00349916	1.60144	0.129897	1.62416	0.150018	32	32	PFS	DIS3
ENSG00000156482.11;AF:chr8:98045399-98045508:98045548:98045399-98045715:98046469:-	0.115598	1.46309	0.000305261	1.32574	0.0142736	1.30425	0.389389	1.15967	0.664454	26	38	PFS	DIS3
ENSG00000156482.11;AF:chr8:98045399-98045508:98045550:98045399-98045715:98046469:-	0.103192	1.46601	0.000285867	1.38203	0.00581453	1.33023	0.354363	1.54378	0.228062	25	39	PFS	DIS3
ENSG00000156831.8;SE:chr8:125091958-125102014:125102146-125102317:+	-0.113759	1.42573	0.00121314	1.30452	0.0239668	1.0081	0.979622	1.00542	0.988068	25	39	PFS	DIS3
ENSG00000158985.13;AF:chr5:131263666:131263900-131315976:131264062:131264166-131315976:+	-0.2047	1.4974	0.000151413	1.39853	0.00330185	1.63676	0.118876	1.5458	0.217985	28	36	PFS	DIS3
ENSG00000160991.16;AF:chr7:102433106:102433355-102436225:102433575:102433661-102436225:+	-0.1838	1.40931	0.000821463	1.31811	0.0140131	1.1349	0.681314	1.09477	0.795146	31	33	PFS	DIS3
ENSG00000163453.11;AF:chr4:57040933-57065489:57065603:57040933-57109877:57110385:-	0.140074	1.3755	0.000831145	1.33102	0.00695175	1.11853	0.731109	1.20211	0.60755	41	23	PFS	DIS3
ENSG00000163902.12;AF:chr3:128644983-128650540:128650821:128644983-128680754:128681075:-	0.137632	1.52885	2.79139e-05	1.44423	0.00063708	2.10499	0.0183055	2.0304	0.0462133	32	32	PFS	DIS3
ENSG00000165516.11;AF:chr14:49768153:49768621-49771594:49768801:49769091-49771594:+	0.145307	1.4444	0.000540492	1.35999	0.00759452	1.23712	0.497754	1.26347	0.486994	28	36	PFS	DIS3
ENSG00000165671.21;AF:chr5:177133773:177133952-177135087:177134173:177134245-177135087:+	0.100291	1.48802	0.000126702	1.32035	0.0132172	1.54838	0.157326	1.41415	0.354674	28	36	PFS	DIS3
ENSG00000167522.16;AF:chr16:89418368-89489038:89489193:89418368-89490245:89490319:-	-0.114361	1.39378	0.000895378	1.27329	0.0278216	1.07902	0.808052	0.976796	0.944425	33	31	PFS	DIS3
ENSG00000167522.16;AL:chr16:89291728:89291777-89305206:89301324:89301636-89305206:-	-0.128299	1.43269	0.000238714	1.30743	0.0126057	1.42569	0.26699	1.39588	0.35998	35	29	PFS	DIS3
ENSG00000167523.13;AL:chr16:89658421-89660540:89661483:89658421-89669286:89670456:+	-0.147703	1.36944	0.00216156	1.31217	0.014908	0.905114	0.746515	0.943808	0.879255	33	31	PFS	DIS3
ENSG00000168439.17;AF:chr11:64185272:64185974-64193078:64186234:64186270-64193078:+	-0.130228	1.39459	0.00128068	1.31281	0.0183455	1.04013	0.898434	0.906643	0.792896	31	33	PFS	DIS3
ENSG00000169814.16;AF:chr3:15601726:15601770-15635424:15601969:15602310-15635424:+	0.109727	1.4584	0.00017354	1.38673	0.00346194	1.53632	0.169069	1.69103	0.134707	34	30	PFS	DIS3
ENSG00000170473.17;AF:chr12:55914366-55927076:55927111:55914366-55927725:55927756:-	0.108886	1.43985	0.000272927	1.30834	0.0118317	1.36889	0.316799	1.16262	0.727851	37	27	PFS	DIS3
ENSG00000172992.12;A3:chr17:45035002-45060888:45034999-45060888:-	-0.146133	1.47372	0.000346786	1.34498	0.0135145	1.38369	0.298991	1.35684	0.386234	27	37	PFS	DIS3
ENSG00000173264.14;AF:chr11:64270062:64270661-64286510:64285859:64286134-64286510:+	-0.105716	1.40568	0.00117524	1.34489	0.00909772	1.02462	0.937336	0.904174	0.774304	31	33	PFS	DIS3
ENSG00000177311.11;AF:chr3:141386446:141386937-141403927:141387812:141387887-141403927:+	-0.13431	1.54202	7.28395e-05	1.43956	0.00199321	1.83142	0.0554642	1.819	0.0732986	28	36	PFS	DIS3
ENSG00000177311.11;AF:chr3:141386446:141386937-141403927:141402349:141402449-141403927:+	-0.188409	1.46894	0.000194142	1.34667	0.00718845	1.4682	0.215413	1.41911	0.320416	32	32	PFS	DIS3
ENSG00000177311.11;AL:chr3:141386937-141394200:141394457:141386937-141403927:141404006:+	0.18152	1.44289	0.000398852	1.40218	0.00336059	1.25062	0.46818	1.40917	0.311696	30	34	PFS	DIS3
ENSG00000182150.18;AF:chr9:95875701:95876084-95880869:95876143:95877105-95880869:+	0.114137	1.38146	0.00131812	1.26239	0.0374993	0.994699	0.986266	0.980626	0.958093	35	29	PFS	DIS3
ENSG00000183283.16;AL:chr12:51241116-51242330:51243931:51241116-51270718:51271362:+	0.114906	1.45996	0.000146116	1.41326	0.00134503	1.6064	0.135967	1.77192	0.0988082	35	29	PFS	DIS3
ENSG00000183283.16;AL:chr12:51241116-51246061:51246717:51241116-51270718:51271362:+	0.134742	1.34809	0.00301261	1.27481	0.0281607	0.805684	0.485162	0.856154	0.661076	31	33	PFS	DIS3
ENSG00000186020.13;SE:chr19:36548322-36551877:36551977-36554670:-	-0.119816	1.4726	0.000298305	1.36915	0.00750294	1.43365	0.247971	1.37834	0.333268	30	34	PFS	DIS3
ENSG00000188690.15;AL:chr10:125788583:125789005-125794880:125791520:125794388-125794880:-	-0.123559	1.39664	0.000434435	1.33584	0.00620777	1.29392	0.435844	1.33095	0.454099	40	24	PFS	DIS3
ENSG00000196352.16;AL:chr1:207339417-207340391:207340766:207339417-207359546:207359713:+	0.124447	1.36032	0.000961822	1.24576	0.0297578	1.01335	0.968762	0.727597	0.436486	42	22	PFS	DIS3
ENSG00000198843.13;AF:chr3:150602875:150603004-150622385:150603321:150603499-150622385:+	-0.109703	1.31616	0.00256832	1.24324	0.0306464	0.720091	0.347033	0.63575	0.270751	48	16	PFS	DIS3
ENSG00000204569.10;SE:chr6:30609955-30614549:30614602-30616478:-	-0.217471	1.43688	0.000393393	1.37362	0.00392768	1.29795	0.399808	1.1517	0.678149	31	33	PFS	DIS3
ENSG00000204628.12;AF:chr5:181242345-181242554:181243370:181242345-181247124:181247576:-	0.16905	1.53074	3.27685e-05	2.11119	0.00109182	1.9786	0.0291205	1.88703	0.081911	30	34	PFS	DIS3
ENSG00000212694.8;A5:chr12:121801808-121802631:121801808-121802879:-	-0.194906	1.46013	0.000237891	1.32049	0.0139501	1.41037	0.271303	1.20185	0.610784	30	34	PFS	DIS3
ENSG00000212694.8;AL:chr12:121795267:121796242-121799847:121799172:121799657-121799847:-	0.118005	1.46761	0.000242079	1.34498	0.0109019	1.45946	0.231131	1.49063	0.259695	31	33	PFS	DIS3
ENSG00000212694.8;RI:chr12:121795267:121795726-121796191:121796242:-	0.155866	1.44972	0.000778812	1.28377	0.0396824	1.10714	0.74906	0.896584	0.766967	22	42	PFS	DIS3
ENSG00000212694.8;SE:chr12:121801808-121802631:121802784-121802879:-	-0.173281	1.46302	0.000366312	1.32275	0.0148234	1.28632	0.419116	1.01619	0.965249	25	39	PFS	DIS3
ENSG00000213462.5;AL:chr7:64990356:64993414-65006541:65006084:65006322-65006541:-	0.114099	1.34407	0.00568531	1.24339	0.0556787	0.719981	0.298366	0.398109	0.0236498	30	34	PFS	DIS3
ENSG00000225484.7;AF:chr10:79814716-79825288:79825381:79814716-79826198:79826299:-	0.125257	1.31095	0.00266815	1.24793	0.0237187	0.61627	0.18823	0.584373	0.219202	49	15	PFS	DIS3
ENSG00000225484.7;AF:chr10:79814716-79825288:79825381:79814716-79826198:79826359:-	0.135996	1.31095	0.00266815	1.24793	0.0237187	0.61627	0.18823	0.584373	0.219202	49	15	PFS	DIS3
ENSG00000225484.7;AL:chr10:79765796:79766324-79804485:79795691:79798027-79804485:-	0.135996	1.31095	0.00266815	1.24793	0.0237187	0.61627	0.18823	0.584373	0.219202	49	15	PFS	DIS3
ENSG00000226950.8;SE:chr4:52712959-52713494:52713702-52714199:+	0.109291	1.33019	0.00220032	1.25162	0.029347	0.807245	0.520017	0.778182	0.508829	45	19	PFS	DIS3
ENSG00000229809.8;AL:chr16:30569346:30570436-30571010:30570734:30570940-30571010:-	0.102588	1.36442	0.000964074	1.2953	0.0123721	1.06074	0.858913	0.997075	0.993305	43	21	PFS	DIS3
ENSG00000231074.9;AL:chr6:30286703:30289494-30296132:30290818:30294964-30296132:-	-0.109839	1.44881	0.000299504	1.3822	0.00344805	1.42429	0.253051	1.34469	0.365534	32	32	PFS	DIS3
ENSG00000235453.10;AL:chr9:32552479-32552801:32552913:32552479-32566391:32568621:+	0.155083	1.31559	0.00343044	1.28015	0.0154326	0.695762	0.265425	0.566073	0.198491	43	21	PFS	DIS3
ENSG00000238227.8;AF:chr9:136117024-136118072:136118431:136117024-136118485:136118534:-	-0.100137	1.43478	0.000412286	1.35098	0.00896112	1.37066	0.311984	1.46772	0.286322	35	29	PFS	DIS3
ENSG00000244462.8;A5:chr20:35659014-35664760:35659014-35664802:-	-0.107607	1.39933	0.00174418	1.27924	0.0317874	0.98437	0.959858	0.763758	0.448978	27	37	PFS	DIS3
ENSG00000254873.1;AF:chr11:118399061-118401203:118401309:118399061-118401575:118401895:-	-0.110902	1.39273	0.00226701	1.29831	0.022611	0.893647	0.724373	0.748053	0.415373	27	37	PFS	DIS3
ENSG00000259583.3;AL:chr15:100892343:100896066-100918804:100913203:100915980-100918804:-	0.102234	1.37858	0.00109841	1.30358	0.0118204	1.02737	0.931184	0.954302	0.898412	38	26	PFS	DIS3
ENSG00000269439.6;AF:chr19:17491197-17492356:17492389:17491197-17511343:17511889:-	0.146666	1.36755	0.00200496	1.26627	0.0292234	0.934161	0.825349	0.737182	0.413838	35	29	PFS	DIS3
ENSG00000269439.6;AL:chr19:17488990:17489095-17491076:17489801:17490120-17491076:-	-0.146666	1.36755	0.00200496	1.26627	0.0292234	0.934161	0.825349	0.737182	0.413838	35	29	PFS	DIS3
ENSG00000269893.8;A3:chr4:118278792-118278944:118278792-118279107:+	0.132749	1.47181	0.000219879	1.33498	0.0104808	1.43415	0.249069	1.37312	0.391237	28	36	PFS	DIS3
ENSG00000269893.8;RI:chr4:118278755:118278792-118279107:118279137:+	0.149182	1.45642	0.000137426	1.32423	0.00811761	1.59832	0.148396	1.44063	0.3427	34	30	PFS	DIS3
ENSG00000269893.8;RI:chr4:118279389:118279431-118279624:118279820:+	0.149182	1.45642	0.000137426	1.32423	0.00811761	1.59832	0.148396	1.44063	0.3427	34	30	PFS	DIS3
ENSG00000269893.8;SE:chr4:118278792-118278944:118279137-118279389:+	0.137463	1.44063	0.000168934	1.36854	0.00305784	1.4849	0.224133	1.5032	0.237141	36	28	PFS	DIS3
ENSG00000273061.1;AL:chr9:4676600:4676749-4679387:4678819:4679165-4679387:-	0.1236	1.41812	0.00105224	1.31742	0.0166681	1.07093	0.825465	0.948178	0.879217	28	36	PFS	DIS3
ENSG00000277161.2;A5:chr17:36535601-36537094:36535592-36537094:+	-0.126282	1.4332	0.00011344	1.30949	0.00765521	1.80391	0.097567	1.62527	0.266966	42	22	PFS	DIS3
ENSG00000278540.5;AF:chr17:37339850-37358999:37359116:37339850-37406262:37406836:-	0.175388	1.39394	0.00172541	1.29983	0.0229783	0.9367	0.834529	0.906955	0.79297	30	34	PFS	DIS3
ENSG00000003402.20;AF:chr2:201116164:201116481-201129729:201129329:201129520-201129729:+	0.122539	1.91537	0.0214707	1.29368	0.443016	1.21819	0.614675	1.62803	0.37136	17	19	PFS	DIS3_BI
ENSG00000003402.20;AF:chr2:201116239:201116481-201129729:201122477:201122747-201129729:+	0.15732	1.92513	0.0132191	1.33809	0.334406	1.27847	0.538727	1.7028	0.310063	21	15	PFS	DIS3_BI
ENSG00000003402.20;AF:chr2:201116239:201116481-201129729:201129329:201129520-201129729:+	0.135377	1.69093	0.0397668	1.22101	0.504465	0.914271	0.823482	1.02957	0.962494	23	13	PFS	DIS3_BI
ENSG00000003402.20;AF:chr2:201118664:201118901-201129729:201129329:201129520-201129729:+	0.200375	1.74731	0.0210847	1.31348	0.309412	0.929797	0.863657	1.10642	0.830644	24	12	PFS	DIS3_BI
ENSG00000005801.18;MX:chr11:3360565-3360720:3360788-3370975:3360565-3361743:3368855-3370975:-	0.131319	1.7538	0.0329668	1.41842	0.229694	0.955079	0.906898	1.13094	0.784959	20	16	PFS	DIS3_BI
ENSG00000005893.16;AL:chrX:120427827:120428626-120441730:120436494:120439293-120441730:-	0.161744	2.04633	0.0113185	1.67663	0.0825028	1.36945	0.420749	1.41942	0.426585	19	17	PFS	DIS3_BI
ENSG00000008838.20;A3:chr17:40053768-40054361:40053657-40054361:-	0.120488	0.762268	0.674046	0.66666	0.535742	0.431819	0.277198	0.163798	0.0409473	18	18	OS	DIS3_BI
ENSG00000008838.20;A3:chr17:40053768-40054361:40053657-40054361:-	0.120488	1.20261	0.560766	0.831755	0.579134	0.482653	0.0675379	0.335747	0.0403933	18	18	PFS	DIS3_BI
ENSG00000008988.10;A3:chr8:56073768-56074060:56073272-56074060:-	-0.120508	1.73836	0.0421156	1.5403	0.140954	0.94782	0.891161	0.79549	0.631394	18	18	PFS	DIS3_BI
ENSG00000010244.18;SE:chr17:32365487-32366665:32366757-32367772:+	0.100902	2.08278	0.00949916	1.30103	0.445262	1.33145	0.464493	2.05828	0.297183	17	19	PFS	DIS3_BI
ENSG00000013561.18;AF:chr5:141969136:141969167-141970704:141969269:141969617-141970704:+	0.171574	0.498961	0.38742	0.406706	0.268341	0.260751	0.139272	0.11638	0.0456532	17	19	OS	DIS3_BI
ENSG00000013561.18;AF:chr5:141969136:141969167-141970704:141969269:141969617-141970704:+	0.171574	1.84453	0.0369893	1.37933	0.308234	1.08164	0.841561	0.65752	0.415562	17	19	PFS	DIS3_BI
ENSG00000014216.16;A5:chr11:65181843-65182701:65181782-65182701:+	-0.131746	2.27031	0.0497729	2.29608	0.0568751	4.03208	0.125725	4.18221	0.143115	21	15	OS	DIS3_BI
ENSG00000014216.16;A5:chr11:65181843-65182701:65181782-65182701:+	-0.131746	2.18137	0.00322059	1.76234	0.0414167	1.52648	0.284256	1.99827	0.156217	21	15	PFS	DIS3_BI
ENSG00000023572.10;AF:chr1:193101204-193105264:193105433:193101204-193105517:193106114:-	0.176426	1.88831	0.0196829	1.43277	0.24079	1.14979	0.721341	0.911338	0.843891	19	17	PFS	DIS3_BI
ENSG00000033030.15;SE:chr12:122482695-122483279:122483563-122489386:-	0.102274	1.987	0.0196352	1.22884	0.53762	1.26498	0.558296	1.72554	0.27264	17	19	PFS	DIS3_BI
ENSG00000033170.17;AF:chr14:65410592:65411993-65455621:65412730:65413214-65455621:+	-0.141748	2.21058	0.00710288	1.76359	0.068352	1.49244	0.315906	2.19771	0.110311	15	21	PFS	DIS3_BI
ENSG00000035115.22;AF:chr2:253115-263211:263983:253115-263984:264032:-	-0.128529	4.39662	0.0130276	6.71195	0.00223008	3.7691	0.0756356	5.77236	0.0450792	8	28	OS	DIS3_BI
ENSG00000035115.22;AF:chr2:253115-263211:263983:253115-263984:264032:-	-0.128529	2.53487	0.039545	2.96094	0.0185911	1.8653	0.221694	2.52684	0.154335	8	28	PFS	DIS3_BI
ENSG00000059377.18;AL:chr7:139787426-139789264:139789622:139787426-139797210:139797484:+	-0.216993	1.37189	0.260009	1.07044	0.818231	0.503463	0.0849027	0.314315	0.010414	19	17	PFS	DIS3_BI
ENSG00000060642.11;A5:chr1:26788819-26790759:26788268-26790759:+	-0.144316	1.99968	0.014324	1.56527	0.140905	1.25281	0.563454	1.22951	0.66755	17	19	PFS	DIS3_BI
ENSG00000065150.21;SE:chr13:97969830-97975891:97975997-97976693:+	0.128836	0.713893	0.524365	0.754251	0.609974	0.276222	0.0788623	0.139746	0.02642	26	10	OS	DIS3_BI
ENSG00000065150.21;SE:chr13:97969830-97975891:97975997-97976693:+	0.128836	1.43602	0.143442	1.23035	0.438528	0.415331	0.0366817	0.218767	0.0117663	26	10	PFS	DIS3_BI
ENSG00000067221.14;SE:chr15:73984130-73984659:73984871-73985318:-	0.109435	1.79793	0.0258656	1.59422	0.0944132	1.04627	0.908887	0.802057	0.653707	22	14	PFS	DIS3_BI
ENSG00000070081.17;AF:chr11:17276739:17276828-17282789:17277023:17277095-17282789:+	0.133122	1.94683	0.00255432	1.53487	0.0881438	1.52928	0.429183	1.27838	0.683815	27	9	PFS	DIS3_BI
ENSG00000070081.17;AF:chr11:17276741:17276828-17282789:17277023:17277095-17282789:+	0.131392	1.86962	0.00551778	1.45343	0.144907	1.20333	0.708668	1.02089	0.970486	26	10	PFS	DIS3_BI
ENSG00000075151.20;MX:chr1:20981227-20982388:20982408-21002713:20981227-21001199:21001312-21002713:-	0.137928	1.69384	0.0391076	1.26026	0.4261	0.905002	0.80274	0.95689	0.926862	23	13	PFS	DIS3_BI
ENSG00000075413.18;MX:chr14:103492034-103498502:103498528-103502882:103492034-103500156:103500200-103502882:+	0.100882	2.06412	0.0815086	2.44072	0.0475096	3.85503	0.139427	4.93144	0.0820593	21	15	OS	DIS3_BI
ENSG00000075413.18;MX:chr14:103492034-103498502:103498528-103502882:103492034-103500156:103500200-103502882:+	0.100882	2.29671	0.000872789	2.09551	0.00618819	1.88657	0.124154	1.54783	0.356066	21	15	PFS	DIS3_BI
ENSG00000079150.18;SE:chr2:178465931-178469652:178469785-178477062:-	0.105782	1.92323	0.0105877	1.3016	0.36872	1.14128	0.741484	1.75747	0.249744	21	15	PFS	DIS3_BI
ENSG00000081189.16;AF:chr5:88887598-88889051:88889324:88887598-88903916:88904257:-	-0.159692	2.33348	0.00141231	1.75958	0.0504062	1.79571	0.144854	1.78033	0.218318	18	18	PFS	DIS3_BI
ENSG00000089006.16;A3:chr20:17954231-17955365:17954223-17955365:-	0.116745	2.39608	0.0014381	2.07845	0.0112429	1.88216	0.122507	1.81596	0.210062	16	20	PFS	DIS3_BI
ENSG00000089094.19;A3:chr12:121443793-121444012:121443030-121444012:-	0.143879	0.407958	0.249976	0.41109	0.263415	0.214564	0.0878525	0.14112	0.0362838	18	18	OS	DIS3_BI
ENSG00000089094.19;A3:chr12:121443793-121444012:121443030-121444012:-	0.143879	1.97224	0.0128157	1.6013	0.110287	1.2637	0.549249	1.24533	0.65877	18	18	PFS	DIS3_BI
ENSG00000091490.11;AL:chr4:25748064:25748564-25757534:25755922:25756908-25757534:-	-0.120801	1.87407	0.0400772	1.88298	0.0438048	1.15516	0.714998	1.13459	0.814451	16	20	PFS	DIS3_BI
ENSG00000093010.14;AL:chr22:19964299-19967164:19967694:19964299-19968536:19968998:+	-0.201329	2.0137	0.00393014	1.71943	0.0344429	1.37007	0.459689	0.824469	0.712665	22	14	PFS	DIS3_BI
ENSG00000096746.17;A5:chr10:68332216-68337199:68331854-68337199:+	-0.1328	2.28327	0.00256412	1.63688	0.101537	1.63406	0.213082	1.71945	0.316692	16	20	PFS	DIS3_BI
ENSG00000096746.17;RI:chr10:68337199:68337333-68338503:68338687:+	-0.1328	2.28327	0.00256412	1.63688	0.101537	1.63406	0.213082	1.71945	0.316692	16	20	PFS	DIS3_BI
ENSG00000100109.17;SE:chr22:26510702-26511119:26511195-26512099:-	0.127472	1.71583	0.0471322	1.43948	0.207683	0.932958	0.858793	0.814721	0.647208	20	16	PFS	DIS3_BI
ENSG00000100209.11;AF:chr22:28742039:28742331-28743882:28742679:28742728-28743882:+	0.123391	2.01353	0.0132559	1.48867	0.188201	1.23627	0.585561	1.30259	0.579068	17	19	PFS	DIS3_BI
ENSG00000100209.11;AF:chr22:28742055:28742331-28743882:28742679:28742728-28743882:+	0.167553	2.31398	0.000771821	2.00544	0.0145074	1.8002	0.147606	1.89717	0.163535	19	17	PFS	DIS3_BI
ENSG00000100209.11;AF:chr22:28742055:28742331-28743882:28742701:28742728-28743882:+	0.147261	1.65643	0.0478998	1.48924	0.137573	0.829412	0.641857	0.616168	0.279419	22	14	PFS	DIS3_BI
ENSG00000101040.19;AF:chr20:47347926-47356380:47356414:47347926-47356657:47356889:-	0.157016	2.22028	0.00671121	1.96367	0.0259286	1.38356	0.404624	1.03861	0.930061	15	21	PFS	DIS3_BI
ENSG00000101040.19;SE:chr20:47236516-47238758:47239138-47246008:-	0.11599	2.0851	0.007167	1.3986	0.253538	1.26382	0.549404	1.45601	0.469024	18	18	PFS	DIS3_BI
ENSG00000101444.13;AF:chr20:34295585-34302345:34302675:34295585-34303243:34303317:-	-0.177617	2.01761	0.0080371	1.59419	0.093755	1.32339	0.486185	0.810734	0.674216	20	16	PFS	DIS3_BI
ENSG00000102226.10;AF:chrX:47233392:47233533-47239070:47233772:47233912-47239070:+	0.112236	1.99443	0.0114629	1.72625	0.0609873	1.39437	0.400227	1.58754	0.321392	20	16	PFS	DIS3_BI
ENSG00000103496.15;AF:chr16:31033095:31033522-31034013:31033786:31033835-31034013:+	-0.138362	2.3055	0.00329354	2.21155	0.00660773	1.75506	0.170793	1.47052	0.42164	16	20	PFS	DIS3_BI
ENSG00000104852.15;A5:chr19:49102185-49104634:49102173-49104634:+	0.154527	0.521168	0.283305	0.439218	0.196484	0.178347	0.025312	0.174552	0.0437545	24	12	OS	DIS3_BI
ENSG00000104960.15;AF:chr19:49850828:49850955-49854406:49851159:49851499-49854406:+	-0.103907	2.28684	0.00130722	1.99789	0.0138333	1.85121	0.139036	2.11432	0.157616	19	17	PFS	DIS3_BI
ENSG00000104964.15;AF:chr19:3061257-3062174:3062277:3061257-3062700:3063107:-	0.122391	1.72753	0.0447308	1.33596	0.319013	0.879301	0.741181	0.644804	0.361059	19	17	PFS	DIS3_BI
ENSG00000105085.11;AF:chr19:16578409-16627872:16628204:16578409-16628522:16629062:-	0.161544	1.93694	0.0122243	1.6876	0.0632972	1.13586	0.745886	0.710015	0.475364	18	18	PFS	DIS3_BI
ENSG00000105287.12;A3:chr19:46716535-46716951:46716259-46716951:-	-0.157481	2.14606	0.00221549	1.60433	0.0938556	1.60638	0.258047	1.60369	0.430347	21	15	PFS	DIS3_BI
ENSG00000106105.15;RI:chr7:30628560:30631541-30632247:30632437:+	-0.199033	1.678	0.0425623	1.35461	0.262796	0.863048	0.713753	0.589495	0.349538	24	12	PFS	DIS3_BI
ENSG00000106603.19;MX:chr7:43657269-43658712:43659144-43729429:43657269-43665658:43665722-43729429:-	-0.115951	1.81866	0.0413241	1.39827	0.272599	1.0147	0.970154	1.02813	0.950237	17	19	PFS	DIS3_BI
ENSG00000108312.15;AF:chr17:44218296-44219009:44219121:44218296-44220740:44220963:-	-0.168987	2.43038	0.000382045	2.01204	0.0102919	2.00284	0.0909726	2.12736	0.121029	21	15	PFS	DIS3_BI
ENSG00000108312.15;AF:chr17:44218296-44219445:44219675:44218296-44221201:44221626:-	0.133126	2.24446	0.01184	2.14255	0.0206615	1.43669	0.37127	1.51789	0.435272	12	24	PFS	DIS3_BI
ENSG00000109332.20;AF:chr4:102826636-102827427:102827566:102826636-102868715:102868875:-	0.102848	2.30075	0.00238008	2.00942	0.0147723	1.71068	0.176697	1.16284	0.749501	18	18	PFS	DIS3_BI
ENSG00000109971.14;AF:chr11:123061329-123061913:123062032:123061329-123062750:123063230:-	0.108501	1.73487	0.0430961	1.43741	0.198768	0.958412	0.913811	0.60703	0.321129	21	15	PFS	DIS3_BI
ENSG00000110200.8;AF:chr11:72111496-72111924:72112232:72111496-72112650:72112774:-	-0.13383	1.88112	0.0253397	1.34561	0.345291	1.1472	0.725257	1.37746	0.492046	18	18	PFS	DIS3_BI
ENSG00000110315.7;AF:chr11:10534205-10540753:10540906:10534205-10541122:10541190:-	-0.212645	2.84159	5.5177e-05	2.46477	0.000926047	3.22365	0.00747866	3.04711	0.02306	20	16	PFS	DIS3_BI
ENSG00000110429.14;AL:chr11:33740939:33742084-33747130:33745937:33746059-33747130:-	0.123086	2.32771	0.00205345	1.6654	0.0979913	1.82912	0.134628	3.0429	0.0204468	19	17	PFS	DIS3_BI
ENSG00000110429.14;AL:chr11:33740956:33742084-33747130:33745937:33746059-33747130:-	0.137819	2.06304	0.00373437	1.40814	0.229445	1.43215	0.389403	1.45718	0.458442	21	15	PFS	DIS3_BI
ENSG00000110931.19;AL:chr12:121237691:121240542-121244573:121243588:121244129-121244573:-	-0.150926	2.05995	0.00224836	1.6221	0.0590906	1.52721	0.333042	1.4544	0.4526	24	12	PFS	DIS3_BI
ENSG00000111237.19;AL:chr12:110491731:110492122-110496012:110492921:110493231-110496012:-	0.108414	1.63077	0.0484386	1.41827	0.19955	0.781881	0.553419	0.506182	0.197533	25	11	PFS	DIS3_BI
ENSG00000111481.10;AF:chr12:54325109:54325181-54340547:54325584:54325682-54340547:+	0.142411	0.366077	0.178282	0.280998	0.0966431	0.157339	0.0380419	0.0652782	0.0244467	21	15	OS	DIS3_BI
ENSG00000111540.16;AF:chr12:55973913:55974000-55986869:55974078:55974139-55986869:+	-0.300348	1.84451	0.00948649	1.52639	0.118755	1.2326	0.637272	1.59142	0.409413	27	9	PFS	DIS3_BI
ENSG00000111540.16;SE:chr12:55987123-55989947:55990098-55990682:+	-0.165431	1.8944	0.00680298	1.60009	0.0847179	1.31734	0.532311	1.81978	0.278666	26	10	PFS	DIS3_BI
ENSG00000111676.15;AF:chr12:6924463:6924537-6933840:6927959:6928384-6933840:+	-0.137131	1.69311	0.0294731	1.35003	0.24457	0.811703	0.62173	0.603448	0.304531	25	11	PFS	DIS3_BI
ENSG00000112237.13;AL:chr6:99543475:99543609-99545112:99543780:99544273-99545112:-	0.101626	1.83026	0.0266227	1.81717	0.040066	1.07451	0.854339	1.21787	0.686918	18	18	PFS	DIS3_BI
ENSG00000112679.14;AF:chr6:325167:326158-345854:337039:337187-345854:+	-0.141783	1.98379	0.0200536	1.27022	0.479959	1.26829	0.557189	1.57862	0.361834	16	20	PFS	DIS3_BI
ENSG00000112763.17;AL:chr6:26466088-26467948:26469637:26466088-26476161:26476619:+	0.120725	2.01836	0.022155	1.28535	0.440784	1.19989	0.64748	1.07545	0.889537	15	21	PFS	DIS3_BI
ENSG00000113558.19;AL:chr5:134148935:134157768-134158455:134157941:134157960-134158455:-	-0.187528	2.12626	0.00783739	1.9304	0.0287332	1.48725	0.324113	2.29891	0.0903909	16	20	PFS	DIS3_BI
ENSG00000115042.10;AF:chr2:95402708:95402872-95405553:95405274:95405402-95405553:+	0.102819	1.80864	0.0357431	1.44533	0.222772	1.07539	0.851889	1.30184	0.61871	18	18	PFS	DIS3_BI
ENSG00000115415.20;AF:chr2:191013678-191014018:191014197:191013678-191020758:191020960:-	0.150224	2.13466	0.00739859	1.85426	0.0374242	1.36865	0.419237	1.15305	0.762414	17	19	PFS	DIS3_BI
ENSG00000115875.19;AF:chr2:38750194-38750824:38751138:38750194-38751229:38751494:-	-0.111837	0.935437	0.889018	0.80979	0.677942	0.440609	0.267237	0.154684	0.043379	26	10	OS	DIS3_BI
ENSG00000115875.19;AF:chr2:38750194-38750824:38751138:38750194-38751229:38751494:-	-0.111837	1.67555	0.028506	1.21082	0.462073	0.776972	0.563909	0.670139	0.475428	26	10	PFS	DIS3_BI
ENSG00000115998.7;AF:chr2:70182935-70190184:70190699:70182935-70190973:70191071:-	-0.102016	1.72502	0.0452281	1.35906	0.295117	0.933283	0.859434	0.710119	0.458642	19	17	PFS	DIS3_BI
ENSG00000116584.20;AF:chr1:155969300-155969969:155971063:155969300-155978913:155979099:-	0.121473	2.24522	0.00162634	1.97892	0.0102803	1.62775	0.220695	1.10035	0.866319	19	17	PFS	DIS3_BI
ENSG00000116584.20;AF:chr1:155969300-155978067:155978160:155969300-155978913:155979113:-	0.16052	2.13059	0.00759701	1.59436	0.118692	1.42349	0.375295	1.33721	0.593628	17	19	PFS	DIS3_BI
ENSG00000116871.15;AF:chr1:36155579:36155733-36170971:36155965:36156463-36170971:+	-0.209441	2.14505	0.00703053	1.99378	0.0165803	1.39038	0.397521	0.918403	0.868416	16	20	PFS	DIS3_BI
ENSG00000116871.15;AF:chr1:36155579:36155733-36170971:36156198:36156463-36170971:+	-0.181013	2.00711	0.0230985	1.81524	0.0576181	1.28271	0.534234	0.904913	0.847808	14	22	PFS	DIS3_BI
ENSG00000117616.18;A5:chr1:25243633-25244177:25243633-25245150:-	0.108219	1.74096	0.0414561	1.3893	0.287524	0.986699	0.972661	1.25617	0.690693	21	15	PFS	DIS3_BI
ENSG00000117616.18;AF:chr1:25247029-25247309:25247457:25247029-25337040:25338165:-	0.208972	2.00878	0.00828112	1.44222	0.233252	1.29525	0.51399	1.12617	0.808667	19	17	PFS	DIS3_BI
ENSG00000117616.18;AL:chr1:25246577:25247029-25267740:25253114:25253937-25267740:-	0.125474	2.30162	0.0033523	1.81012	0.048949	1.72771	0.175271	2.14659	0.109436	17	19	PFS	DIS3_BI
ENSG00000117616.18;RI:chr1:25243550:25244224-25245150:25245301:-	-0.118366	1.71902	0.033856	1.25748	0.428982	0.891795	0.777438	0.787082	0.612998	23	13	PFS	DIS3_BI
ENSG00000117616.18;SE:chr1:25243633-25244454:25244498-25245150:-	0.10299	2.12395	0.0077113	1.79374	0.0707114	1.4215	0.36487	1.72958	0.329252	17	19	PFS	DIS3_BI
ENSG00000117616.18;SE:chr1:25244224-25244454:25244498-25245150:-	-0.208972	2.00878	0.00828112	1.44222	0.233252	1.29525	0.51399	1.12617	0.808667	19	17	PFS	DIS3_BI
ENSG00000117713.20;A3:chr1:26772632-26772812:26772632-26772815:+	-0.147386	1.89431	0.0239292	1.32708	0.349243	1.05566	0.890227	0.731771	0.518121	17	19	PFS	DIS3_BI
ENSG00000119185.13;AF:chr2:9420100-9422479:9423229:9420100-9423373:9423480:-	0.113017	1.88884	0.0159111	1.34118	0.351281	1.19724	0.647993	2.79776	0.0504469	21	15	PFS	DIS3_BI
ENSG00000119397.16;AF:chr9:121118469:121118540-121123931:121121801:121121951-121123931:+	0.111902	1.6025	0.0450378	1.17349	0.542575	0.578727	0.221732	0.463085	0.129641	28	8	PFS	DIS3_BI
ENSG00000120662.16;SE:chr13:41260915-41262411:41262481-41263485:-	0.114344	1.71398	0.0406117	1.40317	0.256009	0.986662	0.972854	1.01813	0.973318	23	13	PFS	DIS3_BI
ENSG00000120694.20;AF:chr13:31158863-31161476:31161904:31158863-31161982:31162388:-	-0.235518	1.9197	0.00710588	1.47497	0.15751	1.34132	0.487899	1.69285	0.25466	25	11	PFS	DIS3_BI
ENSG00000120833.14;AF:chr12:93569814:93570198-93572685:93570980:93571216-93572685:+	-0.159894	1.94057	0.0240446	1.48792	0.192205	1.16647	0.692955	0.858709	0.743484	16	20	PFS	DIS3_BI
ENSG00000121940.16;AF:chr1:108949921-108950309:108951926:108949921-108963361:108963476:-	0.123903	1.70013	0.0437463	1.31431	0.354004	0.843312	0.665952	0.869685	0.768677	21	15	PFS	DIS3_BI
ENSG00000123352.18;AL:chr12:49461037-49462275:49463625:49461037-49484590:49484673:+	-0.247352	2.2686	0.00200257	1.61433	0.0920398	1.57285	0.252601	1.45529	0.418588	17	19	PFS	DIS3_BI
ENSG00000123352.18;SE:chr12:49367587-49371228:49371290-49441730:+	-0.21428	2.2686	0.00200257	1.61433	0.0920398	1.57285	0.252601	1.45529	0.418588	17	19	PFS	DIS3_BI
ENSG00000123815.12;AF:chr19:40714635-40715325:40715616:40714635-40716587:40716885:-	-0.241164	2.33059	0.00052225	1.90063	0.0150339	2.15134	0.0883969	3.41592	0.0520627	22	14	PFS	DIS3_BI
ENSG00000126457.21;AF:chr19:49675786:49676439-49680487:49677277:49677316-49680487:+	-0.203285	2.33745	0.00393589	2.14993	0.0109742	1.562	0.253241	1.33403	0.522245	16	20	PFS	DIS3_BI
ENSG00000127824.14;AF:chr2:219252230-219252996:219253145:219252230-219254095:219254608:-	-0.135494	2.05474	0.00231892	1.87517	0.0200424	1.54874	0.31725	1.25204	0.741502	22	14	PFS	DIS3_BI
ENSG00000127952.17;A5:chr7:76030527-76047662:76030527-76047812:-	-0.1044	2.00847	0.0136962	1.42223	0.260571	1.27585	0.534303	0.777701	0.662342	18	18	PFS	DIS3_BI
ENSG00000128335.14;SE:chr22:36233455-36237061:36237185-36239441:-	0.101664	1.75551	0.0235216	1.29947	0.363772	0.947855	0.896445	0.768585	0.729144	22	14	PFS	DIS3_BI
ENSG00000128699.14;A3:chr2:189783123-189784269:189782602-189784269:-	0.133511	1.81624	0.0419033	1.45568	0.22248	1.04069	0.918507	1.19307	0.694152	17	19	PFS	DIS3_BI
ENSG00000129187.14;SE:chr4:182915575-182916419:182916539-182916673:-	-0.123715	1.82951	0.0268505	1.27027	0.430078	1.05452	0.893716	0.689952	0.464874	19	17	PFS	DIS3_BI
ENSG00000129657.16;AF:chr17:77140932:77141054-77142646:77141070:77141107-77142646:+	0.170042	2.25393	0.0516234	2.49437	0.0358944	4.46885	0.0981886	3.25703	0.221001	20	16	OS	DIS3_BI
ENSG00000129657.16;AF:chr17:77140932:77141054-77142646:77141070:77141107-77142646:+	0.170042	2.12846	0.00324208	1.94726	0.0119225	1.48385	0.325611	1.05189	0.919433	20	16	PFS	DIS3_BI
ENSG00000129657.16;AF:chr17:77140932:77141054-77142646:77141386:77141721-77142646:+	0.234177	2.25393	0.0516234	2.49437	0.0358944	4.46885	0.0981886	3.25703	0.221001	20	16	OS	DIS3_BI
ENSG00000129657.16;AF:chr17:77140932:77141054-77142646:77141386:77141721-77142646:+	0.234177	2.12846	0.00324208	1.94726	0.0119225	1.48385	0.325611	1.05189	0.919433	20	16	PFS	DIS3_BI
ENSG00000129667.13;AF:chr17:76487909-76493062:76493202:76487909-76500936:76501360:-	-0.181585	1.50397	0.146926	1.27715	0.402688	0.61088	0.212876	0.305332	0.0238972	17	19	PFS	DIS3_BI
ENSG00000130305.17;A3:chr7:73303529-73303600:73303524-73303600:-	0.109118	1.91527	0.117535	2.32733	0.0785418	4.08781	0.120346	6.26706	0.0461304	19	17	OS	DIS3_BI
ENSG00000130305.17;A3:chr7:73303529-73303600:73303524-73303600:-	0.109118	2.2154	0.00195441	1.83503	0.0457401	1.71699	0.1835	2.14713	0.114914	19	17	PFS	DIS3_BI
ENSG00000131943.18;AF:chr19:29708423-29715125:29715261:29708423-29715563:29715789:-	0.368843	0.485734	0.367972	0.407358	0.26096	0.272859	0.154291	0.134787	0.0348624	17	19	OS	DIS3_BI
ENSG00000132341.12;SE:chr12:130872126-130872584:130872617-130872836:+	0.11372	1.9162	0.0039143	1.63317	0.0410101	1.28698	0.606979	2.14042	0.236225	29	7	PFS	DIS3_BI
ENSG00000132470.14;SE:chr17:75752577-75753765:75753974-75754576:+	-0.104648	0.983422	0.975636	0.946398	0.921082	0.549966	0.409564	0.160496	0.046323	22	14	OS	DIS3_BI
ENSG00000132470.14;SE:chr17:75752577-75753765:75753974-75754576:+	-0.104648	1.52179	0.121636	1.3092	0.336981	0.647053	0.274379	0.115487	0.00252105	22	14	PFS	DIS3_BI
ENSG00000132471.12;A5:chr17:75846787-75846908:75846787-75847487:-	-0.105375	2.15468	0.0320514	1.50978	0.27056	1.41692	0.418607	1.15244	0.79219	12	24	PFS	DIS3_BI
ENSG00000133063.16;AF:chr1:203240658-203260802:203260862:203240658-203268518:203272809:-	0.164698	1.91905	0.008822	1.64913	0.0673017	1.25152	0.586541	1.68862	0.363971	22	14	PFS	DIS3_BI
ENSG00000133063.16;SE:chr1:203222325-203223135:203223259-203223495:-	0.218821	2.07684	0.00441028	1.63853	0.0805862	1.42055	0.383235	1.19347	0.72426	20	16	PFS	DIS3_BI
ENSG00000133063.16;SE:chr1:203228562-203230015:203230084-203240463:-	0.164698	1.91905	0.008822	1.64913	0.0673017	1.25152	0.586541	1.68862	0.363971	22	14	PFS	DIS3_BI
ENSG00000133460.19;AF:chr22:23857000:23857531-23862104:23857961:23858029-23862104:+	-0.141238	1.74293	0.041301	1.13478	0.674677	0.928696	0.849221	0.643147	0.407716	18	18	PFS	DIS3_BI
ENSG00000133943.20;A5:chr14:91170201-91173289:91170186-91173289:+	0.11424	1.76543	0.0439301	1.29618	0.379419	0.958826	0.913637	0.544048	0.246491	18	18	PFS	DIS3_BI
ENSG00000133943.20;AL:chr14:91215556-91220443:91220766:91215556-91224684:91225355:+	0.113859	1.43913	0.252835	1.1494	0.671272	0.683342	0.338863	0.352128	0.0493298	17	19	PFS	DIS3_BI
ENSG00000134369.15;AF:chr1:201739317:201739844-201780421:201739868:201740076-201780421:+	-0.125993	2.11532	0.0195887	1.64985	0.156418	1.34144	0.465871	2.54946	0.132739	14	22	PFS	DIS3_BI
ENSG00000134369.15;SE:chr1:201793875-201794172:201794246-201794466:+	-0.110784	1.87575	0.0494109	1.42637	0.311755	1.07256	0.861442	2.14097	0.23421	14	22	PFS	DIS3_BI
ENSG00000135506.16;A5:chr12:57696373-57715760:57695981-57715760:+	-0.165071	2.03091	0.00134062	1.90234	0.0108811	1.96571	0.206298	3.51349	0.0667476	28	8	PFS	DIS3_BI
ENSG00000135916.16;AF:chr2:230864980:230865145-230873417:230873231:230873338-230873417:+	-0.121247	1.33483	0.341704	1.23556	0.497498	0.567793	0.151555	0.289264	0.0272567	18	18	PFS	DIS3_BI
ENSG00000136104.21;AF:chr13:50909747:50910140-50927407:50910274:50913131-50927407:+	0.17164	0.821999	0.762595	0.632119	0.481387	0.519677	0.399307	0.117431	0.0237131	18	18	OS	DIS3_BI
ENSG00000136104.21;AF:chr13:50909747:50910140-50927407:50910274:50913131-50927407:+	0.17164	1.84327	0.030297	1.23697	0.473553	1.00877	0.982059	0.385311	0.137375	18	18	PFS	DIS3_BI
ENSG00000136104.21;AF:chr13:50909780:50910140-50927407:50910274:50913131-50927407:+	0.167516	0.200486	0.175055	0.168134	0.121254	0.0983714	0.0825547	0.022899	0.00334373	14	22	OS	DIS3_BI
ENSG00000136104.21;AF:chr13:50909813:50910140-50927407:50910274:50913131-50927407:+	0.20305	0.439302	0.294985	0.458215	0.326001	0.209752	0.0825474	0.0772911	0.011717	18	18	OS	DIS3_BI
ENSG00000136104.21;AF:chr13:50909813:50910140-50927407:50910274:50913131-50927407:+	0.20305	1.19959	0.548351	1.02366	0.94021	0.41753	0.0311431	0.17548	0.002036	18	18	PFS	DIS3_BI
ENSG00000136104.21;AF:chr13:50910007:50910140-50927407:50910274:50913131-50927407:+	0.189172	2.12664	0.0043561	1.34014	0.323899	1.42865	0.366246	1.08347	0.886486	20	16	PFS	DIS3_BI
ENSG00000136104.21;AF:chr13:50910051:50910140-50927407:50910274:50913131-50927407:+	0.112183	1.42887	0.262251	1.10052	0.77009	0.65973	0.298146	0.304975	0.0452194	17	19	PFS	DIS3_BI
ENSG00000136381.13;AF:chr15:78438284:78438356-78439795:78438422:78438856-78439795:+	0.123051	1.12861	0.731236	0.916153	0.809076	0.462168	0.0676015	0.322113	0.0282819	16	20	PFS	DIS3_BI
ENSG00000136603.14;AF:chr3:170357678:170357856-170359699:170358509:170358645-170359699:+	-0.140652	0.409441	0.247047	0.371664	0.201667	0.199841	0.072838	0.0992872	0.0146612	19	17	OS	DIS3_BI
ENSG00000136603.14;AF:chr3:170357678:170357856-170359699:170358509:170358645-170359699:+	-0.140652	1.52112	0.135864	1.13218	0.673348	0.633353	0.243459	0.320816	0.0368125	19	17	PFS	DIS3_BI
ENSG00000137500.9;AF:chr11:83280260-83285127:83285998:83280260-83286100:83286390:-	-0.128799	1.80373	0.240022	1.79737	0.330809	2.1517	0.291953	6.44676	0.0404591	15	21	OS	DIS3_BI
ENSG00000138081.21;AF:chr2:47839769-47888626:47888719:47839769-47905489:47905568:-	0.139269	2.41127	0.00421718	2.10554	0.0184749	1.62708	0.220376	1.23203	0.673289	13	23	PFS	DIS3_BI
ENSG00000138081.21;AF:chr2:47839769-47888626:47888719:47839769-47905489:47906498:-	0.185207	1.94414	0.0188273	1.50698	0.16573	1.1639	0.697832	1.03414	0.937863	17	19	PFS	DIS3_BI
ENSG00000138757.14;SE:chr4:75662049-75724056:75724176-75724276:-	-0.144467	1.88632	0.0246933	1.49756	0.16713	1.0858	0.832468	0.770816	0.614339	18	18	PFS	DIS3_BI
ENSG00000139163.16;AL:chr12:22644022-22644211:22644587:22644022-22659014:22660027:+	0.149329	1.87049	0.0217807	1.56782	0.139997	1.23345	0.600987	1.9807	0.143687	21	15	PFS	DIS3_BI
ENSG00000139218.18;AF:chr12:45964188-45990353:45990576:45964188-45991885:45992120:-	0.114902	1.37393	0.275995	1.21184	0.540023	0.595719	0.185209	0.387008	0.0488512	18	18	PFS	DIS3_BI
ENSG00000139613.12;AL:chr12:56171394:56171432-56172428:56171877:56171937-56172428:-	-0.107745	1.7527	0.020224	1.41878	0.195615	1.02838	0.947048	1.11943	0.82833	26	10	PFS	DIS3_BI
ENSG00000140043.11;A5:chr14:73852004-73858816:73851943-73858816:+	0.175084	1.75991	0.0270063	1.43023	0.182505	0.931296	0.858461	0.620524	0.340715	22	14	PFS	DIS3_BI
ENSG00000140299.13;AF:chr15:59682514-59688732:59688926:59682514-59689135:59689309:-	-0.121652	1.74994	0.0242692	1.29422	0.344467	0.867752	0.728682	0.508068	0.217426	23	13	PFS	DIS3_BI
ENSG00000142082.15;SE:chr11:233534-233911:234004-236616:-	0.10246	1.09127	0.816233	0.734224	0.429989	0.454994	0.0702699	0.183554	0.00842845	14	22	PFS	DIS3_BI
ENSG00000142252.11;AL:chr19:45080029-45088509:45088699:45080029-45090107:45091518:+	-0.115705	2.17917	0.00322322	1.72804	0.0774329	1.53345	0.277242	1.75522	0.305962	16	20	PFS	DIS3_BI
ENSG00000142733.17;RI:chr1:27356590:27356749-27357009:27357114:-	0.127396	2.06088	0.0139179	2.17765	0.00976192	1.34616	0.448392	1.10188	0.846007	16	20	PFS	DIS3_BI
ENSG00000142937.12;AF:chr1:44775251:44775473-44776034:44775578:44775600-44776034:+	-0.141974	2.05067	0.011137	1.81779	0.03857	1.28397	0.520686	0.696212	0.477156	17	19	PFS	DIS3_BI
ENSG00000143321.19;AF:chr1:156745373-156751343:156751496:156745373-156752229:156752448:-	0.156908	2.79573	0.000309033	2.62716	0.00250782	2.4441	0.0318642	2.81965	0.0440208	16	20	PFS	DIS3_BI
ENSG00000143515.18;AF:chr1:154325553:154325702-154328105:154327747:154327861-154328105:+	0.103665	1.90242	0.0149054	1.40961	0.225053	1.11892	0.776498	1.21474	0.688658	20	16	PFS	DIS3_BI
ENSG00000143569.19;A5:chr1:154234792-154235196:154234738-154235196:+	-0.150134	1.76147	0.0446993	1.46518	0.20387	0.967464	0.932065	0.62764	0.307266	17	19	PFS	DIS3_BI
ENSG00000144199.12;SE:chr2:97090325-97091462:97091712-97094701:-	-0.132676	0.622469	0.451353	0.563824	0.369491	0.271436	0.0902322	0.0642165	0.00933771	20	16	OS	DIS3_BI
ENSG00000144199.12;SE:chr2:97090325-97091462:97091712-97094701:-	-0.132676	1.6778	0.0493657	1.28575	0.36545	0.819723	0.61335	0.541533	0.27793	20	16	PFS	DIS3_BI
ENSG00000144224.17;SE:chr2:135748369-135753539:135754277-135755517:+	0.110932	1.81093	0.0242989	1.43349	0.225727	1.01547	0.968898	0.802604	0.620489	19	17	PFS	DIS3_BI
ENSG00000144504.15;SE:chr2:240507691-240509348:240509455-240512802:-	0.110178	1.713	0.0482982	1.27689	0.410284	0.93849	0.87188	0.758014	0.631509	20	16	PFS	DIS3_BI
ENSG00000145425.10;SE:chr4:151099714-151100485:151100588-151102871:+	-0.165528	1.87511	0.026031	1.33819	0.373915	1.1255	0.761176	1.17103	0.774539	16	20	PFS	DIS3_BI
ENSG00000148444.16;AF:chr10:22316415:22316556-22317884:22316735:22316967-22317884:+	0.111528	2.09305	0.00688564	1.58348	0.125192	1.25264	0.563463	1.28188	0.649408	17	19	PFS	DIS3_BI
ENSG00000148444.16;AF:chr10:22316420:22316556-22317884:22316735:22316967-22317884:+	0.152828	2.10306	0.00220126	1.51859	0.110022	1.45947	0.370005	1.5735	0.483995	22	14	PFS	DIS3_BI
ENSG00000148444.16;AF:chr10:22316441:22316556-22317884:22316735:22316967-22317884:+	0.21399	1.77735	0.0497463	1.12228	0.715772	0.940502	0.875707	0.505217	0.226335	16	20	PFS	DIS3_BI
ENSG00000152601.17;AF:chr3:152268040:152269092-152299405:152298982:152299254-152299405:+	-0.279416	1.6304	0.0487056	1.38482	0.229167	0.771408	0.525954	0.434031	0.124049	23	13	PFS	DIS3_BI
ENSG00000153443.13;AF:chr16:4610555-4613960:4614402:4610555-4614678:4614872:-	0.176659	2.02093	0.0168519	1.31732	0.384628	1.31484	0.490257	2.22561	0.154786	18	18	PFS	DIS3_BI
ENSG00000154237.13;SE:chr15:100919451-100920031:100920255-100924511:+	-0.167289	2.35879	0.00774379	1.68988	0.124552	1.64674	0.223704	1.92143	0.200865	15	21	PFS	DIS3_BI
ENSG00000154723.12;AF:chr21:25729801-25734939:25735033:25729801-25735315:25735646:-	-0.139666	2.01774	0.00621317	1.59045	0.104057	1.26382	0.563267	1.18895	0.760562	18	18	PFS	DIS3_BI
ENSG00000154978.13;AL:chr7:55436056:55436174-55492282:55472754:55473045-55492282:-	0.128024	2.03532	0.00341366	1.53304	0.130322	1.46032	0.370464	1.10515	0.861841	22	14	PFS	DIS3_BI
ENSG00000155465.20;AF:chr14:22813440-22815320:22815435:22813440-22819638:22819796:-	-0.103183	1.69863	0.0440619	1.33404	0.309133	0.881229	0.748889	0.715907	0.460484	22	14	PFS	DIS3_BI
ENSG00000155957.18;AF:chr12:66153448-66168915:66169511:66153448-66169855:66169996:-	0.139971	2.04774	0.00871325	1.73699	0.0547928	1.28747	0.517424	0.691451	0.540127	17	19	PFS	DIS3_BI
ENSG00000156482.11;AF:chr8:98045399-98045508:98045546:98045399-98045715:98046469:-	0.173273	2.00718	0.0107297	1.54558	0.138724	1.24018	0.581825	0.88678	0.810424	17	19	PFS	DIS3_BI
ENSG00000156482.11;AF:chr8:98045399-98045508:98045548:98045399-98045715:98046469:-	0.163222	2.45858	0.00103544	2.00064	0.0235532	1.85938	0.124132	2.09262	0.138404	17	19	PFS	DIS3_BI
ENSG00000156482.11;AF:chr8:98045399-98045508:98045550:98045399-98045715:98046469:-	0.150538	2.12335	0.00441855	1.71795	0.0600462	1.36456	0.43127	0.902267	0.832596	17	19	PFS	DIS3_BI
ENSG00000156831.8;SE:chr8:125091958-125102014:125102146-125102317:+	-0.144161	1.90625	0.0441734	1.31629	0.410918	1.03863	0.924391	1.03538	0.940925	12	24	PFS	DIS3_BI
ENSG00000156958.15;AF:chr15:49170260:49170358-49201162:49170478:49170577-49201162:+	0.229319	1.80001	0.0107196	1.4854	0.134324	1.08494	0.860365	0.764407	0.662735	28	8	PFS	DIS3_BI
ENSG00000158985.13;AF:chr5:131263666:131263900-131315976:131264062:131264166-131315976:+	-0.241672	2.06793	0.0103212	1.5945	0.1126	1.35559	0.438692	0.808451	0.688697	18	18	PFS	DIS3_BI
ENSG00000159352.16;AF:chr1:151254758:151254808-151262161:151259063:151259221-151262161:+	0.108825	2.16261	0.0088184	1.50151	0.228648	1.51124	0.296533	1.51998	0.391644	16	20	PFS	DIS3_BI
ENSG00000159352.16;AF:chr1:151254763:151254808-151262161:151259063:151259221-151262161:+	0.116906	2.42038	0.00128668	1.69373	0.116213	1.96623	0.0954974	5.84861	0.0147187	18	18	PFS	DIS3_BI
ENSG00000160014.17;AF:chr19:46601074:46601176-46605827:46601276:46601437-46605827:+	-0.126367	2.08196	0.00558401	1.76284	0.0515818	1.46705	0.334995	1.69331	0.229572	19	17	PFS	DIS3_BI
ENSG00000160326.14;A5:chr9:133473250-133473415:133473250-133473980:-	0.126699	1.90381	0.0181712	1.47894	0.178022	1.19591	0.645968	1.09904	0.837324	20	16	PFS	DIS3_BI
ENSG00000160326.14;RI:chr9:133478254:133478416-133478968:133479096:-	0.126699	1.90381	0.0181712	1.47894	0.178022	1.19591	0.645968	1.09904	0.837324	20	16	PFS	DIS3_BI
ENSG00000161960.16;AF:chr17:7572837:7572864-7574260:7573235:7573547-7574260:+	-0.121745	1.61186	0.0376663	1.28095	0.340953	0.518536	0.164983	0.611839	0.354348	29	7	PFS	DIS3_BI
ENSG00000162639.16;AF:chr1:108659962-108660963:108661093:108659962-108661184:108661526:-	0.147419	1.44058	0.25202	1.05965	0.860431	0.66327	0.301966	0.334911	0.0395324	16	20	PFS	DIS3_BI
ENSG00000162843.17;SE:chr1:241780062-241783272:241783381-241787849:+	-0.147645	1.82677	0.027184	1.3012	0.419861	1.11154	0.79141	1.82682	0.314815	18	18	PFS	DIS3_BI
ENSG00000162910.19;AF:chr1:228108318-228108437:228109254:228108318-228109261:228109299:-	0.110323	1.69433	0.0451677	1.31153	0.353047	0.958676	0.914615	1.12469	0.804849	23	13	PFS	DIS3_BI
ENSG00000163660.12;AL:chr3:157146508:157146607-157149287:157148241:157148589-157149287:-	-0.124959	1.78585	0.0196114	1.28344	0.367227	0.951968	0.904048	0.747008	0.529693	22	14	PFS	DIS3_BI
ENSG00000163660.12;AL:chr3:157146508:157146607-157149287:157148316:157148589-157149287:-	-0.13364	1.78517	0.0401867	1.13659	0.688071	1.0361	0.928612	0.955351	0.924129	19	17	PFS	DIS3_BI
ENSG00000163902.12;AF:chr3:128644983-128650540:128650821:128644983-128680754:128681075:-	0.19951	2.00169	0.0140548	2.01564	0.0143555	1.2021	0.636397	0.823131	0.703692	16	20	PFS	DIS3_BI
ENSG00000164022.17;A5:chr4:106321451-106324985:106320889-106324985:+	-0.138059	2.25977	0.00150691	1.70784	0.0579946	1.77272	0.156066	1.86077	0.224778	22	14	PFS	DIS3_BI
ENSG00000164022.17;SE:chr4:106316594-106320866:106321451-106324985:+	-0.107634	2.58627	0.000151235	1.83019	0.038144	2.33724	0.041883	3.90857	0.0305961	20	16	PFS	DIS3_BI
ENSG00000164405.11;A3:chr5:132866687-132866869:132866687-132867488:+	0.103001	1.93165	0.025093	1.41213	0.258252	1.1534	0.716507	0.79789	0.662224	16	20	PFS	DIS3_BI
ENSG00000164405.11;A5:chr5:132867035-132867488:132866687-132867488:+	0.111726	2.49874	0.00085089	1.89462	0.0251753	1.95431	0.0893333	1.90174	0.275549	18	18	PFS	DIS3_BI
ENSG00000164405.11;SE:chr5:132866687-132866869:132867035-132867488:+	0.107979	1.80635	0.0300214	1.46085	0.179602	1.04704	0.906222	0.590346	0.305947	20	16	PFS	DIS3_BI
ENSG00000164924.18;AF:chr8:100948900-100951235:100951449:100948900-100951929:100952020:-	-0.1114	0.172782	0.115194	0.153296	0.087467	0.0765912	0.0446165	0.0454457	0.0159218	15	21	OS	DIS3_BI
ENSG00000165516.11;AF:chr14:49768153:49768621-49771594:49768801:49769091-49771594:+	0.1969	1.94208	0.0190032	1.41052	0.244852	1.19477	0.650976	0.602391	0.336946	18	18	PFS	DIS3_BI
ENSG00000165671.21;AF:chr5:177133773:177133952-177135087:177134173:177134245-177135087:+	0.147672	2.32171	0.00300031	1.48785	0.198344	1.5543	0.261422	1.59149	0.361101	16	20	PFS	DIS3_BI
ENSG00000166839.17;SE:chr15:64911964-64914033:64914130-64915797:+	-0.100653	2.01143	0.0385751	1.27865	0.493103	1.2152	0.636448	2.66441	0.119282	13	23	PFS	DIS3_BI
ENSG00000166839.17;SE:chr15:64917514-64919819:64919976-64921921:+	-0.117611	1.9025	0.04499	1.1243	0.734662	1.11114	0.794068	2.00859	0.303314	15	21	PFS	DIS3_BI
ENSG00000167522.16;AF:chr16:89418368-89489038:89489193:89418368-89490245:89490319:-	-0.174305	1.9439	0.00951249	1.46189	0.199319	1.26162	0.563905	2.21205	0.139924	21	15	PFS	DIS3_BI
ENSG00000167522.16;AL:chr16:89291728:89291777-89305206:89301324:89301636-89305206:-	-0.188541	2.12247	0.00338285	1.76344	0.0428261	1.5001	0.313705	1.82776	0.264523	20	16	PFS	DIS3_BI
ENSG00000167523.13;AL:chr16:89658421-89660540:89661483:89658421-89669286:89670456:+	-0.110636	1.85497	0.0233457	1.50041	0.167775	1.08266	0.83831	0.695468	0.515811	19	17	PFS	DIS3_BI
ENSG00000167671.12;A3:chr19:4446413-4446500:4446197-4446500:-	0.147254	2.03524	0.00562249	1.61408	0.0798959	1.50128	0.328743	2.16837	0.148706	22	14	PFS	DIS3_BI
ENSG00000168216.13;AF:chr6:69790472-69796414:69796608:69790472-69796813:69797010:-	-0.139595	1.68387	0.0410295	1.39241	0.216068	0.839686	0.668597	0.674903	0.43436	23	13	PFS	DIS3_BI
ENSG00000168385.18;MX:chr2:241315982-241324216:241324241-241335126:241315982-241325993:241326113-241335126:+	-0.107097	2.01568	0.0048573	1.72603	0.0474652	1.42321	0.385932	1.08256	0.868029	21	15	PFS	DIS3_BI
ENSG00000168395.16;AL:chr2:241723271-241723791:241724036:241723271-241724989:241729478:+	0.104241	2.08916	0.00933833	1.84106	0.0443748	1.4044	0.387868	2.60312	0.0757022	18	18	PFS	DIS3_BI
ENSG00000168517.10;AF:chr17:45160700:45160943-45162488:45161845:45162031-45162488:+	-0.103248	1.85886	0.0154619	1.38189	0.230991	1.05855	0.88652	0.704561	0.557909	22	14	PFS	DIS3_BI
ENSG00000168803.16;SE:chr15:43330859-43331900:43332000-43333311:+	-0.104177	2.51793	0.000151342	2.13614	0.0046841	2.38844	0.0410949	1.98287	0.159457	20	16	PFS	DIS3_BI
ENSG00000169756.16;AF:chr2:108621251:108621461-108659605:108657894:108657940-108659605:+	-0.20498	1.93992	0.0097462	1.5008	0.177556	1.28325	0.536338	2.17735	0.196038	20	16	PFS	DIS3_BI
ENSG00000169814.16;AF:chr3:15601726:15601770-15635424:15601969:15602310-15635424:+	0.188137	2.04977	0.00851564	1.69381	0.078695	1.33716	0.455489	2.08792	0.13932	19	17	PFS	DIS3_BI
ENSG00000169814.16;AL:chr3:15642057-15644316:15653714:15642057-15671610:15672955:+	-0.110426	1.81403	0.0288041	1.49256	0.180488	1.01018	0.979236	1.25162	0.656861	18	18	PFS	DIS3_BI
ENSG00000169814.16;AL:chr3:15642057-15644316:15653714:15642057-15710060:15712776:+	-0.167842	1.83884	0.017253	1.7037	0.0541092	1.05964	0.884393	0.976876	0.961363	21	15	PFS	DIS3_BI
ENSG00000170469.10;A3:chr5:139396955-139397041:139396929-139397041:-	-0.158504	1.86129	0.0186263	1.33417	0.348016	1.15788	0.716158	1.17032	0.754276	21	15	PFS	DIS3_BI
ENSG00000170473.17;AF:chr12:55914366-55927076:55927111:55914366-55927725:55927756:-	0.131806	1.83733	0.0210616	1.37641	0.247064	1.03145	0.937238	0.554553	0.355816	22	14	PFS	DIS3_BI
ENSG00000170476.16;A3:chr5:139389420-139389680:139388601-139389680:-	0.101645	1.81593	0.0419421	1.42405	0.274671	1.08392	0.836717	2.06965	0.154501	17	19	PFS	DIS3_BI
ENSG00000170919.16;A3:chr13:45341630-45344305:45341630-45344329:+	-0.158474	1.94201	0.0188772	1.39741	0.307556	1.25465	0.563171	1.44507	0.418093	17	19	PFS	DIS3_BI
ENSG00000172765.17;AF:chr3:129880559-129893182:129893419:129880559-129893494:129893576:-	-0.128223	2.28395	0.0146005	2.00749	0.045566	1.47826	0.344833	1.3209	0.589708	12	24	PFS	DIS3_BI
ENSG00000173264.14;AF:chr11:64270062:64270661-64286510:64285057:64285380-64286510:+	-0.103292	1.96994	0.016428	1.83233	0.0390474	1.15898	0.70576	1.00688	0.990006	16	20	PFS	DIS3_BI
ENSG00000173264.14;AF:chr11:64270062:64270661-64286510:64285859:64286134-64286510:+	-0.14977	2.05502	0.010959	1.73489	0.065946	1.3217	0.476117	1.35038	0.532112	18	18	PFS	DIS3_BI
ENSG00000173846.13;SE:chr1:44804501-44804650:44804779-44805266:+	0.100668	2.38688	0.00103785	1.68982	0.0694485	1.93378	0.104042	2.45645	0.0506042	19	17	PFS	DIS3_BI
ENSG00000174227.16;SE:chr4:516185-521056:521249-521660:+	-0.123341	1.88611	0.0161279	1.55037	0.138221	1.11235	0.786236	1.08057	0.863239	19	17	PFS	DIS3_BI
ENSG00000175087.10;AF:chr1:26111165:26111420-26114292:26111824:26111915-26114292:+	-0.105329	2.43363	0.00883829	1.49225	0.269031	1.67672	0.230718	1.5005	0.525254	12	24	PFS	DIS3_BI
ENSG00000175106.16;AF:chr17:15555364-15562193:15563428:15555364-15563437:15563544:-	-0.222449	1.94736	0.0146114	1.45224	0.236364	1.24611	0.575308	1.1434	0.817626	18	18	PFS	DIS3_BI
ENSG00000177311.11;AF:chr3:141386446:141386937-141403927:141387812:141387887-141403927:+	-0.159558	1.93018	0.0317046	1.45495	0.235836	1.14262	0.735392	0.56924	0.296061	16	20	PFS	DIS3_BI
ENSG00000177311.11;AF:chr3:141386446:141386937-141403927:141402349:141402449-141403927:+	-0.238577	2.34516	0.000914279	1.99798	0.00970746	1.76899	0.154253	1.26526	0.673597	19	17	PFS	DIS3_BI
ENSG00000177311.11;AL:chr3:141386937-141394200:141394457:141386937-141403927:141404006:+	0.201632	2.50713	0.000238471	2.11032	0.00613279	2.11347	0.0693155	1.42445	0.488393	19	17	PFS	DIS3_BI
ENSG00000179083.6;A3:chrX:93674274-93674681:93674274-93674701:+	-0.111051	2.37187	0.0362842	1.53209	0.329031	1.45149	0.425371	1.87546	0.33091	7	29	PFS	DIS3_BI
ENSG00000179083.6;SE:chrX:93674752-93698397:93698485-93709317:+	0.111051	2.37187	0.0362842	1.53209	0.329031	1.45149	0.425371	1.87546	0.33091	7	29	PFS	DIS3_BI
ENSG00000179818.14;AF:chr2:70085624-70085816:70086698:70085624-70086978:70087005:-	0.129748	1.81677	0.00680288	1.44032	0.138456	1.10169	0.860932	1.50406	0.526913	31	5	PFS	DIS3_BI
ENSG00000181722.17;SE:chr3:114380404-114380777:114380940-114389005:-	-0.133244	1.99973	0.0183998	1.61075	0.120267	1.23486	0.595296	1.30083	0.559332	16	20	PFS	DIS3_BI
ENSG00000181852.18;AF:chr12:56216613-56221591:56221701:56216613-56221760:56221860:-	-0.162101	2.22401	0.00351257	1.57363	0.13835	1.52005	0.29121	1.53091	0.342762	17	19	PFS	DIS3_BI
ENSG00000182158.15;AF:chr7:137928366-137933763:137933890:137928366-138001604:138002067:-	-0.127918	1.74185	0.025421	1.49101	0.132301	0.934406	0.868215	0.986665	0.977669	24	12	PFS	DIS3_BI
ENSG00000183283.16;AL:chr12:51241116-51242330:51243784:51241116-51270718:51271362:+	0.103983	2.36605	0.00519267	2.17775	0.0165422	1.75907	0.175863	1.53683	0.379052	15	21	PFS	DIS3_BI
ENSG00000183283.16;AL:chr12:51241116-51242330:51243931:51241116-51270718:51271362:+	0.1177	2.27129	0.00142183	2.31262	0.00159412	1.83324	0.135994	1.86019	0.246185	20	16	PFS	DIS3_BI
ENSG00000183283.16;AL:chr12:51241116-51246061:51246717:51241116-51270718:51271362:+	0.156194	1.48282	0.177405	1.22637	0.511371	0.667864	0.302675	0.309649	0.0231609	17	19	PFS	DIS3_BI
ENSG00000183354.12;SE:chr9:5929159-5944871:5944960-5954016:-	-0.149725	1.93822	0.0306194	1.34308	0.362198	1.1379	0.743313	1.03664	0.938439	16	20	PFS	DIS3_BI
ENSG00000184719.12;AL:chr10:88273864:88275032-88314466:88284102:88285506-88314466:-	-0.120763	1.91832	0.0136162	1.54682	0.132627	1.13198	0.754128	0.950757	0.918123	19	17	PFS	DIS3_BI
ENSG00000185619.18;A3:chr4:733789-733884:733789-734931:+	0.118793	2.33618	0.0292066	2.48812	0.0299865	11.0025	0.0696281	9.04061	0.10899	22	14	OS	DIS3_BI
ENSG00000185619.18;A3:chr4:733789-733884:733789-734931:+	0.118793	2.48285	0.00012751	2.19114	0.00218232	2.46231	0.0392321	2.26167	0.108302	22	14	PFS	DIS3_BI
ENSG00000187091.14;AF:chr3:38020352-38024337:38024787:38020352-38029506:38029642:-	0.109874	1.73753	0.0306258	1.39272	0.220301	0.928424	0.853181	1.19976	0.714521	24	12	PFS	DIS3_BI
ENSG00000188735.13;SE:chr12:121776444-121776822:121777897-121778077:+	-0.127364	1.86665	0.0272187	1.33343	0.356578	1.12837	0.757468	1.5367	0.318738	17	19	PFS	DIS3_BI
ENSG00000196352.16;AL:chr1:207339417-207340391:207340766:207339417-207359546:207359713:+	0.192438	2.2873	0.0009473	1.61581	0.0777984	1.74947	0.177382	2.17458	0.173125	21	15	PFS	DIS3_BI
ENSG00000197111.16;AL:chr12:53471807-53474869:53476070:53471807-53479406:53479683:+	0.10789	2.0122	0.00495598	2.23264	0.00166962	1.39537	0.416821	1.63073	0.576539	22	14	PFS	DIS3_BI
ENSG00000197620.11;AF:chrX:149540630:149540799-149542019:149541012:149541343-149542019:+	-0.112449	0.755377	0.662166	0.762969	0.676393	0.395183	0.228597	0.120775	0.027099	19	17	OS	DIS3_BI
ENSG00000197620.11;AF:chrX:149540630:149540799-149542019:149541012:149541343-149542019:+	-0.112449	1.42942	0.220767	1.32016	0.351361	0.639949	0.254162	0.181895	0.00732576	19	17	PFS	DIS3_BI
ENSG00000198625.13;SE:chr1:204532246-204537430:204537497-204538209:+	0.130116	1.75646	0.211494	2.30157	0.101798	2.39615	0.257694	6.01171	0.045275	18	18	OS	DIS3_BI
ENSG00000198794.12;AF:chr15:74995584:74995673-75011792:74995967:74996259-75011792:+	0.145989	2.02958	0.0274762	1.40598	0.310351	1.24318	0.590635	0.989299	0.985275	13	23	PFS	DIS3_BI
ENSG00000198843.13;AF:chr3:150602875:150603004-150622385:150603321:150603499-150622385:+	-0.147025	1.72925	0.0234626	1.33129	0.294371	0.917101	0.837364	0.596665	0.315601	26	10	PFS	DIS3_BI
ENSG00000203875.13;SE:chr6:85677492-85677795:85678032-85678136:-	-0.147883	1.75965	0.0452557	1.36462	0.30118	0.949455	0.894988	0.957526	0.938532	16	20	PFS	DIS3_BI
ENSG00000204569.10;SE:chr6:30609955-30614549:30614602-30616478:-	-0.245126	2.1297	0.00427625	1.81221	0.0315107	1.37807	0.416011	0.80799	0.671457	18	18	PFS	DIS3_BI
ENSG00000204628.12;AF:chr5:181242345-181242554:181243370:181242345-181247124:181247576:-	0.194069	2.81611	0.0139722	2.77773	0.0211511	6.09975	0.0431269	5.02266	0.0865874	18	18	OS	DIS3_BI
ENSG00000204628.12;AF:chr5:181242345-181242554:181243370:181242345-181247124:181247576:-	0.194069	3.23853	5.73618e-06	2.59413	0.000500797	3.2297	0.0039681	3.48133	0.0188812	18	18	PFS	DIS3_BI
ENSG00000204628.12;AF:chr5:181242345-181243692:181243880:181242345-181247124:181247576:-	0.209743	1.82254	0.0406324	1.62585	0.109708	1.0469	0.906479	0.717909	0.450586	15	21	PFS	DIS3_BI
ENSG00000204628.12;AF:chr5:181242345-181243692:181243889:181242345-181247124:181247576:-	0.230678	2.80985	0.00143023	2.58148	0.00489569	2.38845	0.0446927	2.44097	0.103286	13	23	PFS	DIS3_BI
ENSG00000204628.12;AL:chr5:181236934:181237042-181239067:181238120:181238239-181239067:-	0.257463	1.97385	0.0262997	1.72392	0.0971333	1.17262	0.686464	1.0844	0.852081	13	23	PFS	DIS3_BI
ENSG00000205352.11;AF:chr12:53441745:53441792-53442695:53441795:53442586-53442695:+	-0.114304	1.98793	0.00185033	1.88621	0.0110139	1.72862	0.306162	2.64979	0.202868	27	9	PFS	DIS3_BI
ENSG00000212694.8;A5:chr12:121801808-121802631:121801808-121802879:-	-0.241659	1.88213	0.0136337	1.31223	0.339564	1.07224	0.863533	0.610346	0.36382	20	16	PFS	DIS3_BI
ENSG00000212694.8;RI:chr12:121795267:121795726-121796191:121796242:-	0.207081	2.03228	0.0159902	1.41059	0.269468	1.25337	0.569363	0.737781	0.544468	17	19	PFS	DIS3_BI
ENSG00000212694.8;SE:chr12:121801808-121802631:121802784-121802879:-	-0.223347	1.95294	0.0180154	1.40418	0.253878	1.17629	0.680039	0.501975	0.216545	18	18	PFS	DIS3_BI
ENSG00000213722.9;SE:chr6:31728745-31728865:31729225-31730051:-	0.152287	1.76627	0.0366946	1.42049	0.228612	1.04909	0.902756	1.17291	0.742192	20	16	PFS	DIS3_BI
ENSG00000213741.11;AL:chr14:49570984:49577853-49585950:49583579:49583675-49585950:-	0.107689	1.9986	0.0958629	1.83582	0.19831	4.13381	0.117761	7.40608	0.0474624	19	17	OS	DIS3_BI
ENSG00000213741.11;AL:chr14:49570984:49577853-49585950:49583579:49583675-49585950:-	0.107689	1.74618	0.0404956	1.12498	0.7041	0.910574	0.813874	0.910684	0.861784	19	17	PFS	DIS3_BI
ENSG00000214021.16;SE:chr3:9827072-9827215:9827240-9828960:+	0.168901	1.74239	0.00865587	1.43576	0.122572	0.560004	0.43747	1.05612	0.955724	34	2	PFS	DIS3_BI
ENSG00000214078.12;A5:chr20:35659014-35664359:35659014-35664760:-	-0.166114	2.0099	0.0296831	1.42555	0.295469	1.24317	0.592696	1.20899	0.685859	14	22	PFS	DIS3_BI
ENSG00000215301.11;RI:chrX:41347312:41347451-41347640:41349886:+	-0.100284	1.64183	0.0400433	1.29803	0.338789	0.799175	0.596396	0.997999	0.996923	27	9	PFS	DIS3_BI
ENSG00000216937.13;A5:chr10:32446631-32451592:32446397-32451592:+	-0.10806	1.99159	0.0116408	1.57526	0.124524	1.32677	0.480816	1.54211	0.364754	19	17	PFS	DIS3_BI
ENSG00000220804.8;SE:chr2:242122455-242130655:242130866-242138784:+	-0.108032	1.94476	0.0117665	1.68549	0.0649464	1.17926	0.67505	0.873826	0.766809	18	18	PFS	DIS3_BI
ENSG00000225484.7;AF:chr10:79814716-79825288:79825381:79814716-79826198:79826299:-	0.163313	1.62132	0.0354176	1.38184	0.18801	0.556392	0.218117	0.342195	0.111838	29	7	PFS	DIS3_BI
ENSG00000225484.7;AF:chr10:79814716-79825288:79825381:79814716-79826198:79826359:-	0.163138	1.62132	0.0354176	1.38184	0.18801	0.556392	0.218117	0.342195	0.111838	29	7	PFS	DIS3_BI
ENSG00000225484.7;AL:chr10:79765796:79766324-79804485:79795691:79798027-79804485:-	0.163138	1.62132	0.0354176	1.38184	0.18801	0.556392	0.218117	0.342195	0.111838	29	7	PFS	DIS3_BI
ENSG00000226471.6;AF:chr22:28800683:28800737-28821972:28801892:28801994-28821972:+	0.243494	2.05534	0.00495446	1.73924	0.0394931	1.32165	0.484012	0.852754	0.7718	20	16	PFS	DIS3_BI
ENSG00000227543.5;SE:chr17:28599839-28606296:28606460-28616285:+	-0.132632	1.99767	0.00693168	1.7325	0.0495344	1.23495	0.596358	1.03996	0.927826	18	18	PFS	DIS3_BI
ENSG00000227855.3;AF:chr7:29684642:29685022-29687279:29685154:29685865-29687279:+	0.113938	1.74297	0.0413265	1.23125	0.494128	0.965045	0.927377	0.71093	0.474614	19	17	PFS	DIS3_BI
ENSG00000229809.8;AL:chr16:30569346:30570436-30571010:30570734:30570940-30571010:-	0.100154	1.84662	0.00938511	1.41951	0.18562	1.10385	0.82216	0.863549	0.761741	25	11	PFS	DIS3_BI
ENSG00000231074.9;AL:chr6:30286703:30289494-30296132:30290818:30294964-30296132:-	-0.114702	1.92696	0.0129708	1.71523	0.0508539	1.26862	0.545006	1.11181	0.82092	19	17	PFS	DIS3_BI
ENSG00000231721.7;AL:chr7:130938963:130941858-130945720:130944168:130944447-130945720:-	-0.106122	2.06327	0.0181167	1.43092	0.316927	1.33435	0.465298	2.2539	0.120511	14	22	PFS	DIS3_BI
ENSG00000234912.12;RI:chr17:77088749:77088949-77089153:77089271:+	0.13573	1.28539	0.35352	0.962489	0.896563	0.305734	0.00694115	0.323533	0.0225355	21	15	PFS	DIS3_BI
ENSG00000237765.8;A5:chr4:15681901-15686236:15681784-15686236:+	-0.101953	1.99524	0.00548947	1.62822	0.0714467	1.24925	0.587346	0.979075	0.968999	22	14	PFS	DIS3_BI
ENSG00000238164.6;AL:chr1:2550074:2550274-2550992:2550283:2550731-2550992:-	0.121038	1.93451	0.0394905	1.44898	0.29327	1.13832	0.746548	1.60003	0.425861	13	23	PFS	DIS3_BI
ENSG00000241370.6;RI:chr6:30345298:30345398-30345467:30345573:+	0.125815	2.38919	0.0372456	3.01105	0.0181365	5.67906	0.0516677	11.5584	0.0142433	17	19	OS	DIS3_BI
ENSG00000241370.6;RI:chr6:30345298:30345398-30345467:30345573:+	0.125815	2.50379	0.000802218	2.28948	0.00875577	1.98364	0.0798002	2.29217	0.0703557	17	19	PFS	DIS3_BI
ENSG00000244625.7;AF:chr22:26672805:26672987-26717253:26677662:26677792-26717253:+	0.122121	2.04582	0.0259042	1.1104	0.771645	1.31251	0.503575	1.75577	0.311246	15	21	PFS	DIS3_BI
ENSG00000244625.7;AF:chr22:26672805:26672987-26717253:26693693:26693836-26717253:+	0.12775	2.6718	0.00022299	2.03626	0.0183806	2.39503	0.0310937	3.95865	0.0098678	18	18	PFS	DIS3_BI
ENSG00000244754.9;A5:chr13:32537027-32538683:32537027-32538778:-	0.122698	1.79738	0.0453698	1.59334	0.129169	0.999822	0.999643	1.05946	0.898778	17	19	PFS	DIS3_BI
ENSG00000244879.8;A5:chr15:50355765-50356100:50355545-50356100:+	-0.135511	1.05301	0.898321	0.841785	0.676841	0.452228	0.0828267	0.31585	0.0273627	13	23	PFS	DIS3_BI
ENSG00000247092.7;A5:chr14:95533061-95534035:95533061-95534514:-	0.110796	2.31886	0.0649047	2.72	0.0360694	3.16784	0.134588	5.3692	0.0444934	16	20	OS	DIS3_BI
ENSG00000247092.7;A5:chr14:95533061-95534035:95533061-95534514:-	0.110796	2.5666	0.000907227	2.22932	0.00764942	1.85436	0.116497	1.83762	0.176674	16	20	PFS	DIS3_BI
ENSG00000248309.7;AF:chr5:88883328:88883485-88905209:88889460:88889480-88905209:+	-0.119326	1.78328	0.0281859	1.49486	0.190984	1.05129	0.899809	1.1746	0.764872	21	15	PFS	DIS3_BI
ENSG00000248309.7;AL:chr5:88905773-88940813:88941370:88905773-89031758:89032293:+	0.119326	1.78328	0.0281859	1.49486	0.190984	1.05129	0.899809	1.1746	0.764872	21	15	PFS	DIS3_BI
ENSG00000248932.6;A5:chr3:139390429-139423016:139390237-139423016:+	-0.179809	1.91191	0.0112881	1.52173	0.115239	1.11322	0.789194	0.81627	0.730905	22	14	PFS	DIS3_BI
ENSG00000249592.6;AL:chr4:760202:762740-781772:780246:780717-781772:-	0.192817	1.82813	0.0266904	1.82543	0.0312153	1.05474	0.891304	0.7653	0.58409	20	16	PFS	DIS3_BI
ENSG00000255284.2;AL:chr11:777695-778113:778715:777695-783530:784180:+	-0.123608	2.55028	0.000186259	2.09904	0.00468322	2.23212	0.0507635	1.9622	0.274132	20	16	PFS	DIS3_BI
ENSG00000257727.6;AF:chr12:56314966-56315130:56315206:56314966-56315821:56315930:-	0.169806	2.02138	0.0047329	1.54215	0.134671	1.43073	0.380669	1.23957	0.658365	21	15	PFS	DIS3_BI
ENSG00000265681.7;AF:chr18:49491584-49492131:49492430:49491584-49492458:49492485:-	0.157292	1.91787	0.0109523	1.48137	0.166395	1.19137	0.659707	0.765336	0.569472	19	17	PFS	DIS3_BI
ENSG00000267871.6;A3:chr19:57267712-57276935:57267709-57276935:-	0.14509	1.18814	0.586737	0.884094	0.721353	0.462702	0.0558508	0.29628	0.0339271	17	19	PFS	DIS3_BI
ENSG00000269439.6;AF:chr19:17491197-17492356:17492389:17491197-17511343:17511889:-	0.176337	1.50381	0.162101	1.24164	0.479011	0.713411	0.387872	0.240128	0.0192699	20	16	PFS	DIS3_BI
ENSG00000269439.6;AL:chr19:17488990:17489095-17491076:17489801:17490120-17491076:-	-0.176337	1.50381	0.162101	1.24164	0.479011	0.713411	0.387872	0.240128	0.0192699	20	16	PFS	DIS3_BI
ENSG00000269893.8;A3:chr4:118278792-118278944:118278792-118279107:+	0.173752	1.95071	0.0144229	1.50716	0.14979	1.18037	0.671711	0.866247	0.778897	18	18	PFS	DIS3_BI
ENSG00000269893.8;A5:chr4:118279137-118279389:118278792-118279389:+	0.11675	2.64712	4.30877e-05	2.15497	0.00382845	2.73796	0.021555	3.43883	0.0202799	23	13	PFS	DIS3_BI
ENSG00000269893.8;RI:chr4:118278755:118278792-118279107:118279137:+	0.204942	2.39676	0.00023744	1.79038	0.0228335	2.17475	0.0795012	2.39321	0.169121	22	14	PFS	DIS3_BI
ENSG00000269893.8;RI:chr4:118279389:118279431-118279624:118279820:+	0.204942	2.39676	0.00023744	1.79038	0.0228335	2.17475	0.0795012	2.39321	0.169121	22	14	PFS	DIS3_BI
ENSG00000269893.8;SE:chr4:118278792-118278944:118279137-118279389:+	0.167143	2.32545	0.000727659	1.89334	0.0183217	1.80736	0.145986	1.78309	0.217909	20	16	PFS	DIS3_BI
ENSG00000273061.1;AL:chr9:4676600:4676749-4679387:4678819:4679165-4679387:-	0.154481	1.39014	0.258677	1.12969	0.68519	0.566081	0.14655	0.230404	0.00534161	19	17	PFS	DIS3_BI
ENSG00000277161.2;A5:chr17:36535601-36537094:36535592-36537094:+	-0.160965	2.13128	0.00182019	1.94259	0.00880644	1.57416	0.278782	0.888188	0.84927	22	14	PFS	DIS3_BI
ENSG00000091490.11;AL:chr4:25748266:25748564-25757534:25755922:25756908-25757534:-	0.101222	1.95777	0.0643779	2.14495	0.0385793	4.27267	0.0338141	2.79352	0.189521	25	36	OS	TENT5C
ENSG00000091490.11;AL:chr4:25748266:25748564-25757534:25755922:25756908-25757534:-	0.101222	1.38879	0.196366	1.36582	0.224763	2.56361	0.0144712	2.39309	0.045383	25	36	PFS	TENT5C
ENSG00000125347.14;AF:chr5:132489483-132490050:132490262:132489483-132490545:132490773:-	-0.126173	1.15919	0.481165	1.32364	0.186277	4.08425	0.0117275	4.74765	0.0150518	41	20	PFS	TENT5C
ENSG00000129657.16;AF:chr17:77209861:77212201-77213314:77212715:77212752-77213314:+	0.121476	1.54134	0.290814	2.11622	0.0761193	2.18252	0.198044	4.37933	0.043782	28	33	OS	TENT5C
ENSG00000134285.11;AL:chr12:48921959:48922201-48923782:48922565:48923145-48923782:-	-0.105305	0.821375	0.677197	0.901579	0.828696	0.668618	0.510685	0.220006	0.0443093	28	33	OS	TENT5C
ENSG00000076685.19;AF:chr10:103174982-103176486:103176899:103174982-103193236:103193268:-	0.104513	2.7755	0.0150725	2.74586	0.0182153	14.6635	0.0638495	11.7962	0.109925	13	13	OS	TENT5C_BI
ENSG00000078304.19;AF:chr14:101809835:101810036-101836169:101823878:101823941-101836169:+	0.104625	0.724152	0.385124	0.859296	0.687116	0.313411	0.0253908	0.375126	0.232113	16	10	PFS	TENT5C_BI
ENSG00000085063.17;SE:chr11:33722463-33731424:33731468-33736382:-	0.106743	2.49319	0.0454847	2.84095	0.0249716	4.57833	0.111846	6.87322	0.0903648	14	12	OS	TENT5C_BI
ENSG00000089009.15;AF:chr12:112408656-112409041:112409574:112408656-112409587:112409614:-	0.103743	0.679788	0.33457	0.738315	0.451001	0.321563	0.0315096	0.112523	0.00250139	14	12	PFS	TENT5C_BI
ENSG00000093072.18;AF:chr22:17207290-17209356:17209504:17207290-17219356:17219585:-	-0.12309	0.651139	0.501443	0.775313	0.694965	0.206087	0.053098	0.0820994	0.0366531	18	8	OS	TENT5C_BI
ENSG00000112561.18;AF:chr6:41691235-41705647:41705940:41691235-41732649:41733853:-	0.104949	2.35307	0.0603769	3.42862	0.00908481	4.08572	0.142503	20.7849	0.0225302	14	12	OS	TENT5C_BI
ENSG00000112561.18;AF:chr6:41691235-41705647:41705940:41691235-41732649:41733853:-	0.104949	1.53415	0.202077	1.81388	0.0811671	2.11504	0.152882	6.5989	0.00847652	14	12	PFS	TENT5C_BI
ENSG00000128973.13;AF:chr15:68209759-68211263:68213332:68209759-68229502:68229672:-	-0.238201	0.579118	0.525341	0.549547	0.485915	0.326575	0.248458	0.0518526	0.0291131	12	14	OS	TENT5C_BI
ENSG00000133063.16;SE:chr1:203222325-203223135:203223259-203223495:-	0.103961	2.1172	0.138071	3.01408	0.0329217	2.48632	0.267686	6.16666	0.0730808	11	15	OS	TENT5C_BI
ENSG00000133063.16;SE:chr1:203222325-203223135:203223259-203223495:-	0.103961	1.69743	0.137204	2.21006	0.0283843	2.23212	0.117495	8.29914	0.00597182	11	15	PFS	TENT5C_BI
ENSG00000134324.12;SE:chr2:11773745-11776086:11776193-11779519:+	0.107278	0.686151	0.309396	0.766128	0.476476	0.26233	0.0110186	0.213514	0.0135466	17	9	PFS	TENT5C_BI
ENSG00000135124.15;SE:chr12:121210298-121217134:121217281-121221913:+	-0.117466	2.22692	0.0549605	2.52771	0.0300832	12.8586	0.108755	12.9308	0.122272	18	8	OS	TENT5C_BI
ENSG00000135124.15;SE:chr12:121210298-121217134:121217281-121221913:+	-0.117466	1.48833	0.191082	1.65307	0.104029	2.59351	0.0986312	5.88131	0.0196447	18	8	PFS	TENT5C_BI
ENSG00000136490.9;AF:chr17:63699348-63699803:63699861:63699348-63700032:63700125:-	-0.105536	0.667916	0.352967	0.679249	0.375709	0.409135	0.0947506	0.133632	0.0097969	14	12	PFS	TENT5C_BI
ENSG00000138614.15;SE:chr15:65605236-65607159:65607425-65611098:-	0.109079	2.44465	0.0502746	3.1205	0.0149124	4.20385	0.133902	8.98387	0.0784326	13	13	OS	TENT5C_BI
ENSG00000142541.17;A5:chr19:49490090-49490232:49489912-49490232:+	0.103752	0.729444	0.395181	0.809848	0.574745	0.335045	0.0355447	0.501167	0.313469	17	9	PFS	TENT5C_BI
ENSG00000148356.14;A3:chr9:127494662-127494997:127494662-127495217:+	0.155419	2.31158	0.0658919	2.81129	0.0259221	3.80119	0.164855	4.50673	0.177142	13	13	OS	TENT5C_BI
ENSG00000156587.16;AF:chr11:57560432-57567027:57567326:57560432-57567849:57568284:-	-0.130846	0.767369	0.510599	0.838428	0.663333	0.480652	0.158393	0.274629	0.0366894	12	14	PFS	TENT5C_BI
ENSG00000160953.16;AF:chr19:1354972:1355020-1357009:1356390:1356449-1357009:+	0.17273	0.709298	0.35448	0.821723	0.600572	0.243801	0.015305	0.240109	0.0565891	17	9	PFS	TENT5C_BI
ENSG00000161912.18;A5:chr6:41140205-41140598:41140069-41140598:+	-0.13501	2.90833	0.0198282	2.51922	0.0467046	5.54249	0.0711103	4.19487	0.267251	12	14	OS	TENT5C_BI
ENSG00000162910.19;AF:chr1:228108318-228108437:228108744:228108318-228109261:228109299:-	-0.114049	0.775782	0.525939	0.835601	0.655961	0.479414	0.159178	0.206378	0.0379286	15	11	PFS	TENT5C_BI
ENSG00000164924.18;AF:chr8:100948900-100951235:100951449:100948900-100951929:100952020:-	0.137994	0.65866	0.296146	0.665392	0.312722	0.298403	0.0220757	0.127575	0.0101692	14	12	PFS	TENT5C_BI
ENSG00000177200.17;AF:chr16:53207989:53208347-53209482:53208451:53208709-53209482:+	0.111168	1.23221	0.579262	1.4903	0.298576	1.34672	0.561161	5.01009	0.0285015	14	12	PFS	TENT5C_BI
ENSG00000178177.16;AF:chr4:17972885-18020531:18020734:17972885-18021598:18021757:-	-0.162153	2.00476	0.124792	2.60705	0.038528	3.11251	0.243765	4.92115	0.185484	16	10	OS	TENT5C_BI
ENSG00000179630.11;AF:chr13:43879284:43879734-43880952:43879904:43880119-43880952:+	0.109603	2.12255	0.0484562	1.89438	0.0980355	2.84287	0.0435138	2.41103	0.239007	9	17	PFS	TENT5C_BI
ENSG00000180879.14;AF:chrX:153794191:153794334-153794674:153794449:153794585-153794674:+	0.153474	0.814903	0.756849	0.883181	0.852393	0.384398	0.250546	0.0682615	0.0420946	14	12	OS	TENT5C_BI
ENSG00000187257.16;AF:chr7:77696459:77697055-77736410:77697151:77697348-77736410:+	0.11974	0.456313	0.335312	0.483637	0.37629	0.173844	0.0655006	0.058585	0.0311626	15	11	OS	TENT5C_BI
ENSG00000187257.16;AF:chr7:77696459:77697055-77736410:77697151:77697348-77736410:+	0.11974	0.807218	0.565962	0.86897	0.708727	0.441754	0.116951	0.250178	0.0273115	15	11	PFS	TENT5C_BI
ENSG00000205702.11;A5:chr22:42141339-42141512:42141339-42141625:-	0.151043	2.72744	0.0285694	3.13851	0.0144358	5.07726	0.0888959	6.05378	0.0794772	13	13	OS	TENT5C_BI
ENSG00000258388.7;RI:chr6:32166138:32166232-32166498:32166620:+	-0.155495	2.47924	0.046872	2.71588	0.0322976	4.68443	0.108584	22.3963	0.0286015	15	11	OS	TENT5C_BI
ENSG00000052723.12;A5:chr1:114779284-114780110:114779284-114780449:-	0.106974	3.26255	0.000702749	0.977954	0.966575	1.17984	0.76588	1.11318	0.877174	21	14	OS	TP53
ENSG00000052723.12;A5:chr1:114779284-114780110:114779284-114780449:-	0.106974	2.14518	0.00215854	0.964066	0.927326	1.41643	0.393786	1.53293	0.397957	21	14	PFS	TP53
ENSG00000061676.15;SE:chr2:183023916-183024978:183024995-183037992:-	0.182685	2.72314	0.00250167	0.693595	0.515143	0.738105	0.606781	0.47297	0.281702	25	10	OS	TP53
ENSG00000061676.15;SE:chr2:183023916-183024978:183024995-183037992:-	0.182685	1.69457	0.0288569	0.583001	0.196022	0.740728	0.477232	0.573354	0.277808	25	10	PFS	TP53
ENSG00000077454.16;AL:chr7:100574011:100574356-100575705:100574709:100575304-100575705:-	-0.145257	3.6035	0.000528317	1.56522	0.392674	1.7253	0.325171	2.58934	0.160688	18	17	OS	TP53
ENSG00000077454.16;AL:chr7:100574011:100574356-100575705:100574709:100575304-100575705:-	-0.145257	1.88714	0.0301888	0.913017	0.8175	1.03138	0.937023	0.813788	0.685666	18	17	PFS	TP53
ENSG00000079616.13;A3:chr16:29804065-29804576:29804065-29804814:+	0.120994	3.54486	0.000620073	1.10498	0.847481	1.73628	0.320285	1.32035	0.641164	20	15	OS	TP53
ENSG00000079616.13;A3:chr16:29804065-29804576:29804065-29804814:+	0.120994	2.10906	0.00470199	0.963839	0.926181	1.31328	0.488451	0.865229	0.761764	20	15	PFS	TP53
ENSG00000088038.19;AL:chr19:54153840-54153944:54154455:54153840-54155309:54155680:+	-0.144052	3.63393	0.000110228	1.20563	0.735147	1.5527	0.449303	1.48942	0.538723	21	14	OS	TP53
ENSG00000088038.19;AL:chr19:54153840-54153944:54154455:54153840-54155309:54155680:+	-0.144052	2.2519	0.00111464	1.16	0.716162	1.47169	0.343175	1.56127	0.378164	21	14	PFS	TP53
ENSG00000093010.14;AL:chr22:19964299-19967164:19967694:19964299-19968536:19969016:+	0.104588	2.7027	0.00422662	1.22358	0.700168	0.700096	0.522711	1.0426	0.944594	24	11	OS	TP53
ENSG00000093010.14;AL:chr22:19964299-19967164:19967694:19964299-19968536:19969016:+	0.104588	2.0291	0.00346572	1.5953	0.256469	1.19884	0.665892	1.87336	0.198293	24	11	PFS	TP53
ENSG00000100614.18;AF:chr14:60245785:60246046-60282684:60249221:60249677-60282684:+	-0.168786	2.85169	0.00260855	0.614021	0.388249	0.875966	0.816605	0.359874	0.141726	23	12	OS	TP53
ENSG00000100614.18;AF:chr14:60245785:60246046-60282684:60249221:60249677-60282684:+	-0.168786	2.01929	0.00471228	0.749258	0.492254	1.1736	0.695736	0.841425	0.771632	23	12	PFS	TP53
ENSG00000102034.17;AF:chrX:130081539-130110325:130110497:130081539-130110620:130110716:-	0.11428	3.46682	5.17993e-05	1.0246	0.970662	1.97535	0.351665	1.26105	0.810345	25	10	OS	TP53
ENSG00000102034.17;AF:chrX:130081539-130110325:130110497:130081539-130110620:130110716:-	0.11428	2.06386	0.00166387	0.83585	0.686111	1.34906	0.518396	0.983698	0.97624	25	10	PFS	TP53
ENSG00000105926.15;SE:chr7:24573593-24623666:24623784-24641716:+	0.101824	3.78126	3.24546e-05	2.35364	0.131603	1.93329	0.296756	1.7455	0.45094	24	11	OS	TP53
ENSG00000105926.15;SE:chr7:24573593-24623666:24623784-24641716:+	0.101824	2.59387	5.85714e-05	2.92633	0.00969766	2.15835	0.0816792	4.00183	0.0202907	24	11	PFS	TP53
ENSG00000108107.15;AL:chr19:55388048-55388243:55388343:55388048-55402943:55403250:+	0.118361	4.16423	2.02106e-05	2.98084	0.040782	2.72776	0.107035	3.05671	0.120795	18	17	OS	TP53
ENSG00000115053.16;AF:chr2:231463316-231464160:231464199:231463316-231482684:231483641:-	-0.138722	2.48374	0.0461563	0.648271	0.430299	0.726445	0.582703	0.560936	0.387618	14	21	OS	TP53
ENSG00000115053.16;AF:chr2:231463316-231464160:231464199:231463316-231482684:231483641:-	-0.138722	1.25854	0.49163	0.423019	0.0374023	0.538424	0.135425	0.449829	0.119881	14	21	PFS	TP53
ENSG00000115677.17;AF:chr2:241248348-241249358:241249396:241248348-241249841:241250937:-	-0.148153	2.28265	0.0237568	0.826226	0.71492	0.522158	0.23868	0.6134	0.402121	23	12	OS	TP53
ENSG00000115677.17;AF:chr2:241248348-241249358:241249396:241248348-241249841:241250937:-	-0.148153	1.79361	0.0185897	1.17844	0.687736	0.846101	0.682905	1.19899	0.71264	23	12	PFS	TP53
ENSG00000127314.18;SE:chr12:68611043-68648699:68648781-68654112:+	-0.106834	2.99795	0.00163661	1.60965	0.368874	1.31092	0.64262	1.64699	0.454684	21	14	OS	TP53
ENSG00000127314.18;SE:chr12:68611043-68648699:68648781-68654112:+	-0.106834	2.15551	0.00204811	1.74742	0.172464	1.36414	0.450877	2.31602	0.132422	21	14	PFS	TP53
ENSG00000128609.15;SE:chr7:123545676-123550470:123550586-123557404:-	-0.127525	2.8956	0.00136186	0.708511	0.542869	0.796291	0.699267	0.580732	0.40811	26	9	OS	TP53
ENSG00000128609.15;SE:chr7:123545676-123550470:123550586-123557404:-	-0.127525	1.97376	0.00396	0.858384	0.719229	1.16276	0.731871	0.997198	0.995693	26	9	PFS	TP53
ENSG00000128951.14;AF:chr15:48331095:48331191-48332268:48331429:48331795-48332268:+	-0.142711	3.26969	0.00129935	0.926555	0.892236	1.18984	0.749497	0.742614	0.703067	16	19	OS	TP53
ENSG00000128951.14;AF:chr15:48331095:48331191-48332268:48331429:48331795-48332268:+	-0.142711	1.89057	0.0297819	0.784003	0.550941	1.02146	0.956503	1.20427	0.738312	16	19	PFS	TP53
ENSG00000131089.17;AL:chrX:63634967:63638209-63643980:63639524:63642910-63643980:-	-0.121205	3.21086	0.000830059	1.08136	0.883973	1.12334	0.834038	0.495759	0.287032	20	15	OS	TP53
ENSG00000131089.17;AL:chrX:63634967:63638209-63643980:63639524:63642910-63643980:-	-0.121205	2.08303	0.004179	1.30706	0.501089	1.28096	0.539015	1.18176	0.735803	20	15	PFS	TP53
ENSG00000134508.12;AF:chr18:23134564:23134651-23188838:23135763:23136607-23188838:+	-0.11086	3.32741	0.000585715	0.947249	0.918272	1.13542	0.820933	1.29585	0.69232	22	13	OS	TP53
ENSG00000134508.12;AF:chr18:23134564:23134651-23188838:23135763:23136607-23188838:+	-0.11086	2.47475	0.000130897	1.49269	0.340141	2.03415	0.107306	1.49773	0.451104	22	13	PFS	TP53
ENSG00000135441.7;AF:chr12:55716038:55716196-55716933:55716292:55716717-55716933:+	0.112494	3.56408	0.001221	1.07736	0.887031	1.18112	0.759403	0.611103	0.515276	16	19	OS	TP53
ENSG00000135441.7;AF:chr12:55716038:55716196-55716933:55716292:55716717-55716933:+	0.112494	2.06876	0.0133155	1.08105	0.843872	1.19804	0.64422	1.02196	0.966559	16	19	PFS	TP53
ENSG00000135916.16;AF:chr2:230864980:230865145-230873417:230873231:230873338-230873417:+	0.111522	2.64472	0.0127267	1.06764	0.900016	1.02497	0.963903	0.999579	0.999414	18	17	OS	TP53
ENSG00000135916.16;AF:chr2:230864980:230865145-230873417:230873231:230873338-230873417:+	0.111522	1.75737	0.0453666	1.10171	0.805404	0.890157	0.764294	0.86013	0.747378	18	17	PFS	TP53
ENSG00000136104.21;AL:chr13:50949505-50956358:50956460:50949505-50969932:50970456:+	-0.14331	1.75494	0.0386418	0.904029	0.795916	0.858051	0.69511	0.994702	0.991274	20	15	PFS	TP53
ENSG00000136104.21;AL:chr13:50949505-50956358:50956460:50949505-50969932:50973745:+	-0.121217	2.64224	0.00517427	0.981799	0.971851	0.88868	0.840704	1.39465	0.603609	25	10	OS	TP53
ENSG00000136104.21;AL:chr13:50949505-50956358:50956460:50949505-50969932:50973745:+	-0.121217	2.23481	0.000494915	1.51154	0.339768	1.68595	0.255346	2.21878	0.140956	25	10	PFS	TP53
ENSG00000136754.17;SE:chr10:26751783-26759062:26759238-26765218:-	0.117518	5.83492	6.28901e-07	3.04398	0.0322862	3.8903	0.0189595	3.57963	0.0475988	16	19	OS	TP53
ENSG00000136754.17;SE:chr10:26751783-26759062:26759238-26765218:-	0.117518	3.02329	0.000101237	2.20797	0.0409731	2.19111	0.0488775	3.03477	0.0178327	16	19	PFS	TP53
ENSG00000136856.18;AL:chr9:127404991-127405420:127405447:127404991-127407112:127407898:+	0.113454	2.74075	0.00604603	0.945133	0.914646	0.887709	0.828594	0.734686	0.636798	17	18	OS	TP53
ENSG00000136856.18;AL:chr9:127404991-127405420:127405447:127404991-127407112:127407898:+	0.113454	1.78121	0.0405801	0.957909	0.913045	0.883853	0.750367	0.994868	0.991365	17	18	PFS	TP53
ENSG00000136856.18;AL:chr9:127404991-127405420:127405469:127404991-127407112:127407898:+	0.112746	4.01054	7.34859e-05	1.58384	0.389059	1.68121	0.354479	1.17184	0.822694	15	20	OS	TP53
ENSG00000136856.18;AL:chr9:127404991-127405420:127405469:127404991-127407112:127407898:+	0.112746	2.16648	0.00850168	1.21677	0.613706	1.29965	0.500848	1.5967	0.282518	15	20	PFS	TP53
ENSG00000137216.19;AF:chr6:44126914:44127072-44134561:44127554:44127678-44134561:+	-0.113557	4.44512	2.36325e-05	3.27538	0.0275238	3.07289	0.0767226	7.67736	0.0104424	19	16	OS	TP53
ENSG00000137216.19;AF:chr6:44126914:44127072-44134561:44127554:44127678-44134561:+	-0.113557	2.12437	0.00573449	1.80895	0.137803	1.27476	0.534035	2.5391	0.103126	19	16	PFS	TP53
ENSG00000138032.21;AL:chr2:44218537-44229993:44231471:44218537-44232316:44232721:+	0.125419	4.65118	1.72915e-06	2.64741	0.0898489	2.77845	0.102148	2.89583	0.191089	21	14	OS	TP53
ENSG00000138032.21;AL:chr2:44218537-44229993:44231471:44218537-44232316:44232721:+	0.125419	2.38814	0.000689365	1.89742	0.104618	1.61393	0.231122	3.14399	0.0427831	21	14	PFS	TP53
ENSG00000138668.19;AF:chr4:82371584-82373119:82373150:82371584-82373446:82373991:-	-0.159394	3.54171	7.46055e-05	1.65959	0.388006	1.72739	0.385948	1.4295	0.604635	22	13	OS	TP53
ENSG00000138668.19;AF:chr4:82371584-82373119:82373150:82371584-82373446:82373991:-	-0.159394	1.70867	0.0357402	0.70358	0.392976	0.730064	0.437798	0.665086	0.425528	22	13	PFS	TP53
ENSG00000143549.21;AF:chr1:154173201-154176115:154176242:154173201-154182988:154183147:-	-0.143127	2.90786	0.00368261	0.993989	0.990819	0.884705	0.821451	0.624021	0.457832	21	14	OS	TP53
ENSG00000143761.16;AF:chr1:228082741:228082850-228097078:228083085:228083512-228097078:+	-0.120754	4.15469	0.000758418	1.02708	0.963075	1.54613	0.436819	0.881636	0.83829	10	25	OS	TP53
ENSG00000143761.16;AF:chr1:228082741:228082850-228097078:228083085:228083512-228097078:+	-0.120754	2.37367	0.010519	0.960498	0.930229	1.34793	0.465592	1.17169	0.768441	10	25	PFS	TP53
ENSG00000143761.16;AF:chr1:228082741:228082850-228097078:228088116:228088277-228097078:+	-0.121172	4.28381	0.000580606	1.11563	0.849723	1.62053	0.389832	0.97599	0.968219	9	26	OS	TP53
ENSG00000143761.16;AF:chr1:228082741:228082850-228097078:228088116:228088277-228097078:+	-0.121172	2.19372	0.0279515	0.870621	0.767088	1.21142	0.649531	1.00438	0.993551	9	26	PFS	TP53
ENSG00000143761.16;AF:chr1:228082741:228082850-228097078:228090488:228091071-228097078:+	-0.119542	4.28381	0.000580606	1.11563	0.849723	1.62053	0.389832	0.97599	0.968219	9	26	OS	TP53
ENSG00000143761.16;AF:chr1:228082741:228082850-228097078:228090488:228091071-228097078:+	-0.119542	2.19372	0.0279515	0.870621	0.767088	1.21142	0.649531	1.00438	0.993551	9	26	PFS	TP53
ENSG00000150967.18;SE:chr12:122940284-122940807:122940995-122944391:-	-0.140108	2.76206	0.0056607	0.663712	0.480889	0.855367	0.774196	0.320639	0.113632	18	17	OS	TP53
ENSG00000153048.11;AF:chr16:8859335-8868327:8868361:8859335-8868966:8869006:-	0.134808	3.20414	0.000150976	1.45794	0.532769	2.79315	0.299611	5.0098	0.117218	31	4	OS	TP53
ENSG00000153048.11;AF:chr16:8859335-8868327:8868361:8859335-8868966:8869006:-	0.134808	2.04525	0.000923848	1.29486	0.61862	1.59506	0.440204	1.85676	0.379805	31	4	PFS	TP53
ENSG00000156313.15;RI:chrX:38287094:38287245-38287861:38288041:-	-0.139766	3.62455	0.00105818	1.79448	0.25489	1.35389	0.581274	1.42589	0.550594	15	20	OS	TP53
ENSG00000156313.15;RI:chrX:38287094:38287245-38287861:38288041:-	-0.139766	1.82297	0.0493062	1.22748	0.599486	0.925076	0.842533	1.00746	0.986207	15	20	PFS	TP53
ENSG00000156384.14;AF:chr10:104122058:104122154-104122965:104122165:104122196-104122965:+	0.129156	4.92391	6.06798e-06	3.9354	0.00871151	3.2916	0.0392146	8.27934	0.00765594	17	18	OS	TP53
ENSG00000156384.14;AF:chr10:104122058:104122154-104122965:104122165:104122196-104122965:+	0.129156	2.33953	0.00385937	1.8773	0.109819	1.38789	0.404273	2.13295	0.139724	17	18	PFS	TP53
ENSG00000158604.15;AL:chr7:44577894:44579628-44581449:44579897:44581239-44581449:-	0.106009	2.29261	0.032762	0.969607	0.95364	0.722765	0.549975	0.792767	0.72068	21	14	OS	TP53
ENSG00000160050.15;RI:chr1:32204598:32204620-32205194:32205387:+	0.160745	5.15351	3.38254e-06	3.59118	0.0160106	3.28302	0.0396557	5.40626	0.0127925	17	18	OS	TP53
ENSG00000160050.15;RI:chr1:32204598:32204620-32205194:32205387:+	0.160745	3.32067	6.50141e-06	3.1537	0.00523668	2.55287	0.0207697	4.70547	0.00587629	17	18	PFS	TP53
ENSG00000166803.14;SE:chr15:64366075-64373698:64373764-64376743:-	-0.109249	4.1833	4.54727e-05	1.79259	0.274758	1.90241	0.246072	1.48781	0.539398	18	17	OS	TP53
ENSG00000166803.14;SE:chr15:64366075-64373698:64373764-64376743:-	-0.109249	2.75961	0.000127789	2.04436	0.0667394	1.81875	0.12983	1.99775	0.176056	18	17	PFS	TP53
ENSG00000168214.20;AF:chr4:26320725:26320815-26386353:26362436:26362628-26386353:+	0.181393	2.28348	0.0236268	0.397427	0.0832095	0.504801	0.210097	0.410283	0.2307	25	10	OS	TP53
ENSG00000168214.20;AF:chr4:26320725:26320815-26386353:26362436:26362628-26386353:+	0.181393	2.04206	0.00194664	0.820033	0.657108	1.28205	0.588022	0.923646	0.903925	25	10	PFS	TP53
ENSG00000171928.14;AF:chr17:18781314:18782549-18789353:18789035:18789051-18789353:+	-0.151223	3.49842	0.00304503	1.26047	0.66033	1.47573	0.47412	0.980675	0.974469	13	22	OS	TP53
ENSG00000171928.14;AF:chr17:18781314:18782549-18789353:18789035:18789051-18789353:+	-0.151223	2.87047	0.000350536	2.05598	0.0657335	1.83566	0.120255	2.21623	0.0903393	13	22	PFS	TP53
ENSG00000173221.14;AL:chr5:95813979:95814389-95816507:95814563:95814807-95816507:-	0.125469	4.32774	2.9588e-05	2.41585	0.0920856	1.95003	0.229481	1.90537	0.311468	16	19	OS	TP53
ENSG00000173221.14;AL:chr5:95813979:95814389-95816507:95814563:95814807-95816507:-	0.125469	2.33947	0.00384547	1.53068	0.276196	1.42907	0.359916	1.91913	0.175358	16	19	PFS	TP53
ENSG00000187231.14;A5:chr2:179115256-179116574:179115256-179116668:-	-0.145116	3.30927	0.000323295	1.47925	0.471106	1.29175	0.660481	1.96424	0.309859	23	12	OS	TP53
ENSG00000187231.14;A5:chr2:179115256-179116574:179115256-179116668:-	-0.145116	1.89257	0.0102	0.904355	0.804874	1.01201	0.976673	0.749935	0.585358	23	12	PFS	TP53
ENSG00000196642.19;AL:chr9:136832370-136833720:136834340:136832370-136835742:136836998:+	-0.122669	2.40586	0.0240339	0.669321	0.44614	0.61574	0.371198	0.281475	0.103791	19	16	OS	TP53
ENSG00000197841.15;RI:chr19:34739148:34739268-34739523:34739621:+	-0.106093	5.02788	0.000506831	1.60932	0.408539	2.43699	0.123488	3.46428	0.0781058	10	25	OS	TP53
ENSG00000197841.15;RI:chr19:34739148:34739268-34739523:34739621:+	-0.106093	2.39243	0.0223522	0.96151	0.932337	1.32746	0.520506	0.97925	0.970025	10	25	PFS	TP53
ENSG00000198791.12;SE:chr8:17230848-17232427:17232537-17234716:-	0.106861	2.27637	0.024162	0.511785	0.203	0.498568	0.202557	0.333179	0.113371	24	11	OS	TP53
ENSG00000198791.12;SE:chr8:17230848-17232427:17232537-17234716:-	0.106861	1.59802	0.0584582	0.478697	0.0774137	0.596113	0.211237	0.296305	0.0375542	24	11	PFS	TP53
ENSG00000205352.11;AF:chr12:53441732:53441792-53442695:53441795:53442586-53442695:+	-0.170796	2.64923	0.012504	0.611975	0.347668	0.777544	0.643096	0.662946	0.521335	20	15	OS	TP53
ENSG00000205352.11;AF:chr12:53441732:53441792-53442695:53441795:53442586-53442695:+	-0.170796	1.47458	0.166642	0.429776	0.0379151	0.578581	0.171727	0.379372	0.059686	20	15	PFS	TP53
ENSG00000217128.12;SE:chr5:131709272-131710578:131710661-131716565:-	0.130525	2.46331	0.0205883	0.988529	0.98235	0.712064	0.532275	0.840846	0.767449	18	17	OS	TP53
ENSG00000217128.12;SE:chr5:131709272-131710578:131710661-131716565:-	0.130525	1.79664	0.0313421	1.15086	0.723381	0.871501	0.724932	0.878305	0.792986	18	17	PFS	TP53
ENSG00000223482.8;SE:chr10:87203936-87246115:87246212-87288442:-	-0.152371	2.93271	0.0106917	1.16112	0.783065	1.02137	0.969342	2.7036	0.231402	17	18	OS	TP53
ENSG00000223482.8;SE:chr10:87203936-87246115:87246212-87288442:-	-0.152371	1.77929	0.0490107	0.887885	0.763313	0.97506	0.948258	1.46821	0.483801	17	18	PFS	TP53
ENSG00000230590.11;AL:chrX:74028251:74031813-74280394:74067483:74069584-74280394:-	-0.153738	5.44768	1.56277e-06	5.72658	0.000947407	3.41872	0.0338551	16.1872	0.000724306	15	20	OS	TP53
ENSG00000230590.11;AL:chrX:74028251:74031813-74280394:74067483:74069584-74280394:-	-0.153738	2.6508	0.000946585	2.46309	0.027087	1.77512	0.149671	3.74987	0.0120351	15	20	PFS	TP53
ENSG00000230989.7;A3:chr16:83809425-83811421:83809425-83817786:+	0.120469	2.83389	0.00104829	0.775148	0.667257	0.864232	0.822734	0.784127	0.744503	27	8	OS	TP53
ENSG00000230989.7;A3:chr16:83809425-83811421:83809425-83817786:+	0.120469	1.95529	0.00289071	0.881338	0.784184	1.08452	0.869119	0.95774	0.936247	27	8	PFS	TP53
ENSG00000234912.12;AF:chr17:77088631:77088682-77089153:77088778:77088949-77089153:+	0.102781	2.43154	0.010324	0.620329	0.374287	0.496735	0.22459	0.452539	0.27124	25	10	OS	TP53
ENSG00000241370.6;RI:chr6:30345298:30345398-30345467:30345573:+	0.121339	1.27697	0.401342	0.295471	0.00177482	0.409913	0.040682	0.199711	0.00566674	18	17	PFS	TP53
ENSG00000273841.5;AF:chr5:69366595-69369387:69369477:69366595-69369657:69370013:-	-0.128134	3.45152	0.000390107	1.99593	0.192891	1.32309	0.613707	1.58582	0.468139	18	17	OS	TP53
ENSG00000273841.5;AF:chr5:69366595-69369387:69369477:69366595-69369657:69370013:-	-0.128134	1.94916	0.0142686	1.45366	0.340997	1.06809	0.866103	1.7741	0.254376	18	17	PFS	TP53
ENSG00000066136.20;A3:chr1:40769415-40770397:40769415-40770712:+	0.108995	2.36601	3.10229e-05	1.52625	0.0795501	4.98872	0.0267436	8.02316	0.0182641	6	15	OS	TP53_BI
ENSG00000074603.19;AF:chr15:65512564-65515656:65517273:65512564-65517486:65517663:-	0.102145	2.1916	6.66244e-06	1.50435	0.0759538	3.04478	0.0734059	5.17279	0.0281173	10	11	OS	TP53_BI
ENSG00000108107.15;AL:chr19:55388048-55388243:55388343:55388048-55402943:55403250:+	0.131217	2.25009	1.13979e-06	1.77437	0.0157218	5.56744	0.020451	17.2707	0.00551137	10	11	OS	TP53_BI
ENSG00000108107.15;AL:chr19:55388048-55388243:55388343:55388048-55402943:55403250:+	0.131217	1.39256	0.00711118	1.27841	0.0914053	2.12201	0.126094	12.7395	0.00340518	10	11	PFS	TP53_BI
ENSG00000122359.18;SE:chr10:80176155-80180941:80181455-80205343:-	-0.102718	2.3511	2.86553e-06	1.67277	0.0303496	4.05605	0.0231381	4.67479	0.0215251	9	12	OS	TP53_BI
ENSG00000122359.18;SE:chr10:80176155-80180941:80181455-80205343:-	-0.102718	1.47266	0.00406188	1.31071	0.0695714	12.7296	0.000891429	29.3646	0.000656607	9	12	PFS	TP53_BI
ENSG00000136450.13;AL:chr17:58003493:58003718-58004923:58003802:58004001-58004923:-	0.168159	2.24311	1.29823e-06	1.54871	0.0474774	5.17974	0.029075	6.63629	0.033308	12	9	OS	TP53_BI
ENSG00000173221.14;AL:chr5:95813979:95814389-95816507:95814563:95814807-95816507:-	0.165899	2.1197	1.02936e-05	1.60857	0.0420283	2.36357	0.164058	3.80658	0.0851829	10	11	OS	TP53_BI
ENSG00000171552.13;AF:chr20:31722348-31722444:31722548:31722348-31722618:31722860:-	0.1917	2.14317	8.87532e-06	1.60585	0.0427365	2.37381	0.16192	4.73919	0.0625872	10	11	OS	TP53_BI
ENSG00000136450.13;AL:chr17:58003493:58003718-58004923:58003802:58004001-58004923:-	0.168159	1.41586	0.0039716	1.25173	0.105244	4.18262	0.0265199	5.09108	0.0422165	12	9	PFS	TP53_BI
ENSG00000137216.19;AF:chr6:44126914:44127072-44134561:44127554:44127678-44134561:+	-0.139253	2.20788	3.22679e-06	1.62728	0.0363853	4.82208	0.0381089	31.0791	0.0018632	12	9	OS	TP53_BI
ENSG00000178982.10;AL:chr19:38626102-38630702:38630968:38626102-38632430:38632900:+	-0.126889	2.18236	1.34517e-05	1.50853	0.0747262	2.13543	0.2035	2.86312	0.134972	8	13	OS	TP53_BI
ENSG00000137216.19;AF:chr6:44126914:44127072-44134561:44127554:44127678-44134561:+	-0.139253	1.36103	0.00875643	1.23314	0.139879	1.75635	0.252459	9.74115	0.00948123	12	9	PFS	TP53_BI
ENSG00000160050.15;RI:chr1:32204598:32204620-32205194:32205387:+	0.141219	2.16065	4.15972e-06	1.47825	0.0764457	2.98527	0.0950618	3.36185	0.130921	11	10	OS	TP53_BI
ENSG00000219200.11;A5:chr17:7012761-7013666:7012757-7013666:+	0.102965	2.04319	9.9978e-06	1.47827	0.0773709	2.24201	0.21963	3.20989	0.164314	12	9	OS	TP53_BI
ENSG00000105926.15;SE:chr7:24573593-24623666:24623784-24641716:+	0.171527	2.07557	1.39596e-05	1.4873	0.0782961	2.07426	0.242424	3.39043	0.159534	11	10	OS	TP53_BI
ENSG00000154309.9;SE:chr1:222823945-222827428:222827601-222835119:+	0.102205	2.2992	7.81723e-06	1.64665	0.0372576	4.17995	0.0276502	26.3398	0.00224103	8	13	OS	TP53_BI
ENSG00000231074.9;A5:chr6:30296237-30326009:30296237-30326151:-	-0.146005	2.01012	7.60507e-06	1.47162	0.0821821	2.40926	0.241768	5.50388	0.0948851	14	7	OS	TP53_BI
ENSG00000154309.9;SE:chr1:222823945-222827428:222827601-222835119:+	0.102205	1.37508	0.0116091	1.24254	0.135253	2.00291	0.15878	27.4302	0.00103127	8	13	PFS	TP53_BI
ENSG00000136754.17;SE:chr10:26751783-26759062:26759238-26765218:-	0.124893	2.20875	6.122e-06	1.4542	0.0886259	2.78483	0.0982207	2.94012	0.128967	10	11	OS	TP53_BI
ENSG00000156384.14;AF:chr10:104122058:104122154-104122965:104122165:104122196-104122965:+	0.145571	2.22642	2.64739e-06	1.73255	0.021531	3.48482	0.0563898	7.65575	0.0190877	10	11	OS	TP53_BI
ENSG00000156384.14;AF:chr10:104122058:104122154-104122965:104122165:104122196-104122965:+	0.145571	1.38078	0.00941144	1.25153	0.119736	1.99142	0.160951	12.7786	0.00360462	10	11	PFS	TP53_BI
ENSG00000285437.1;AL:chr7:102562656:102567083-102569835:102567484:102568184-102569835:-	0.119819	2.03384	5.89498e-06	1.43886	0.0951814	1.69976	0.422101	1.66037	0.539159	11	10	OS	TP53_BI
ENSG00000182858.14;A3:chr22:49904066-49904179:49903879-49904179:-	0.108336	2.09155	2.06381e-06	1.43247	0.0988869	2.86668	0.158337	2.66742	0.211293	13	8	OS	TP53_BI
ENSG00000273841.5;AF:chr5:69366595-69369387:69369477:69366595-69369657:69370013:-	-0.135158	2.01376	1.21714e-05	1.43233	0.100088	1.24771	0.719933	1.54006	0.537179	11	10	OS	TP53_BI
ENSG00000160050.15;RI:chr1:32204598:32204620-32205194:32205387:+	0.141219	1.43748	0.00311156	1.2674	0.0922687	3.71275	0.0149783	5.24388	0.0337725	11	10	PFS	TP53_BI
ENSG00000035115.22;MX:chr2:242871-243503:243562-247538:242871-244627:244738-247538:-	-0.138668	1.99245	2.45627e-05	1.42783	0.106666	1.19517	0.764115	1.50609	0.536899	10	11	OS	TP53_BI
ENSG00000166508.18;RI:chr7:100099023:100099403-100099589:100099753:-	-0.104675	2.2217	1.08686e-05	1.42156	0.109924	2.20814	0.189839	2.4835	0.188898	8	13	OS	TP53_BI
ENSG00000163945.18;A5:chr4:1347887-1348090:1347760-1348090:+	0.101799	1.3874	0.0064436	1.1613	0.269223	2.31814	0.0991996	4.33119	0.0340883	11	10	PFS	TP53_BI
ENSG00000136856.18;AL:chr9:127404991-127405420:127405469:127404991-127407112:127407898:+	0.115317	2.00899	7.31783e-06	1.40899	0.111857	1.48166	0.553311	1.62129	0.564039	11	10	OS	TP53_BI
ENSG00000143761.16;AF:chr1:228082741:228082850-228097078:228090488:228091071-228097078:+	-0.211253	2.10816	1.95172e-05	1.4237	0.112844	1.48138	0.511138	1.3386	0.651327	7	14	OS	TP53_BI
ENSG00000106603.19;AL:chr7:43609233:43609641-43639449:43631152:43633408-43639449:-	0.109208	2.03553	3.23127e-05	1.41467	0.117309	1.51709	0.49031	1.74483	0.426582	10	11	OS	TP53_BI
ENSG00000171552.13;AF:chr20:31722348-31722444:31722548:31722348-31722618:31722860:-	0.1917	1.36822	0.0107653	1.23843	0.136616	1.59094	0.347108	4.39213	0.043899	10	11	PFS	TP53_BI
ENSG00000169592.15;A5:chr16:30004657-30005221:30001530-30005221:+	0.106523	2.0244	1.95659e-05	1.40336	0.122374	1.1524	0.815009	1.09934	0.891462	10	11	OS	TP53_BI
ENSG00000184220.12;SE:chr3:99818043-100051232:100051306-100146973:+	-0.137427	1.96042	1.96463e-05	1.39462	0.124211	0.979652	0.973561	0.966633	0.963948	14	7	OS	TP53_BI
ENSG00000138032.21;AL:chr2:44218537-44229993:44231471:44218537-44232316:44232721:+	0.179182	2.05827	4.94057e-06	1.38565	0.124548	1.9183	0.323147	1.91288	0.466859	13	8	OS	TP53_BI
ENSG00000173915.16;SE:chr10:103394394-103395746:103396032-103396409:-	-0.113422	1.9837	4.56955e-05	1.40356	0.125328	1.33293	0.6293	1.64492	0.476789	10	11	OS	TP53_BI
ENSG00000187231.14;A5:chr2:179115256-179116574:179115256-179116668:-	-0.154523	2.06215	4.84415e-06	1.39425	0.126759	1.94646	0.315654	1.9095	0.389799	14	7	OS	TP53_BI
ENSG00000173221.14;A3:chr5:95814957-95816507:95814807-95816507:-	0.114162	2.17889	1.35236e-05	1.6414	0.0397096	2.62647	0.10626	7.0783	0.0193208	8	13	OS	TP53_BI
ENSG00000196655.12;AF:chr11:119018766:119018970-119021760:119019392:119020253-119021760:+	-0.127531	2.0475	5.34345e-06	1.37419	0.135783	1.58262	0.487299	1.29391	0.757231	13	8	OS	TP53_BI
ENSG00000173221.14;A3:chr5:95814957-95816507:95814807-95816507:-	0.114162	1.34956	0.0173089	1.22853	0.160816	1.44749	0.466349	8.04324	0.00986811	8	13	PFS	TP53_BI
ENSG00000136754.17;SE:chr10:26751783-26759062:26759238-26765218:-	0.124893	1.40736	0.00611379	1.23061	0.137585	3.33231	0.0324224	3.42169	0.0667464	10	11	PFS	TP53_BI
ENSG00000116678.20;AL:chr1:65622981-65633152:65635428:65622981-65636191:65641559:+	0.129736	2.09708	0.000136876	1.42142	0.139625	1.28752	0.706828	1.8024	0.46071	4	17	OS	TP53_BI
ENSG00000173221.14;AL:chr5:95813979:95814389-95816507:95814563:95814807-95816507:-	0.165899	1.33844	0.0170238	1.22031	0.166882	1.28475	0.613667	6.37372	0.0202844	10	11	PFS	TP53_BI
ENSG00000166803.14;SE:chr15:64366075-64373698:64373764-64376743:-	-0.164091	2.03968	1.00239e-05	1.36692	0.143517	1.54087	0.485786	1.32689	0.677954	12	9	OS	TP53_BI
ENSG00000153029.14;SE:chr1:181034074-181036997:181037112-181049052:+	-0.105295	2.04926	5.29661e-06	1.37021	0.143874	1.81985	0.364351	2.07433	0.292813	13	8	OS	TP53_BI
ENSG00000163945.18;A5:chr4:1347887-1348090:1347760-1348090:+	0.101799	2.08167	1.3536e-05	1.37137	0.148477	2.04143	0.250393	2.71593	0.152489	11	10	OS	TP53_BI
ENSG00000219200.11;A5:chr17:7012761-7013666:7012757-7013666:+	0.102965	1.36101	0.00878289	1.22036	0.149619	1.58318	0.360559	2.75948	0.128615	12	9	PFS	TP53_BI
ENSG00000115310.18;AF:chr2:54987698-55010087:55010449:54987698-55049745:55050544:-	0.100431	1.98725	4.45839e-05	1.38111	0.149878	1.44233	0.538251	2.17477	0.280229	10	11	OS	TP53_BI
ENSG00000077454.16;AL:chr7:100574011:100574356-100575705:100574709:100575304-100575705:-	-0.173442	1.92598	4.30564e-05	1.37464	0.15176	1.10623	0.87003	1.76007	0.486564	12	9	OS	TP53_BI
ENSG00000249859.12;SE:chr8:127939676-127982360:127982479-127983904:+	0.166661	2.07601	2.40861e-06	1.35967	0.153023	2.65907	0.192986	3.3379	0.207683	14	7	OS	TP53_BI
ENSG00000213999.17;A3:chr19:19146384-19146555:19146022-19146555:-	0.115771	2.04665	1.69475e-05	1.37132	0.153549	1.97344	0.310475	2.99426	0.172327	10	11	OS	TP53_BI
ENSG00000196655.12;AF:chr11:119018766:119018970-119021760:119019392:119020253-119021760:+	-0.127531	1.39712	0.00418696	1.21186	0.156133	2.80818	0.0716029	2.90893	0.265186	13	8	PFS	TP53_BI
ENSG00000105926.15;SE:chr7:24573593-24623666:24623784-24641716:+	0.171527	1.37106	0.0090031	1.21724	0.157681	1.66723	0.29552	2.29162	0.269037	11	10	PFS	TP53_BI
ENSG00000148484.18;SE:chr10:16782084-16816973:16817084-16817315:-	0.122626	2.02824	6.48256e-06	1.34946	0.160115	1.93779	0.329589	1.9955	0.319877	14	7	OS	TP53_BI
ENSG00000178982.10;AL:chr19:38626102-38630702:38630968:38626102-38632430:38632900:+	-0.126889	1.41881	0.00646803	1.26181	0.111535	3.14712	0.0250938	8.51717	0.00591816	8	13	PFS	TP53_BI
ENSG00000285437.1;AL:chr7:102562656:102567083-102569835:102569200:102569543-102569835:-	0.102865	2.32259	1.60321e-06	1.76837	0.0176742	5.76431	0.0106672	18.6226	0.00213037	10	11	OS	TP53_BI
ENSG00000066136.20;A3:chr1:40769415-40770397:40769415-40770712:+	0.108995	1.39782	0.0110552	1.22058	0.167005	2.65257	0.0808956	3.05609	0.165009	6	15	PFS	TP53_BI
ENSG00000128951.14;AF:chr15:48331095:48331191-48332268:48331429:48331795-48332268:+	-0.184106	2.05664	1.56086e-05	1.35222	0.167204	1.83449	0.32299	2.95072	0.196063	10	11	OS	TP53_BI
ENSG00000166803.14;SE:chr15:64366075-64373698:64373764-64376743:-	-0.164091	1.3838	0.00576131	1.20006	0.1772	2.1551	0.152713	1.57964	0.543322	12	9	PFS	TP53_BI
ENSG00000168958.20;MX:chr2:227340380-227347226:227347384-227355677:227340380-227352514:227352573-227355677:+	0.11058	1.95762	1.20583e-05	1.33408	0.178793	1.33155	0.666351	1.46065	0.591157	14	7	OS	TP53_BI
ENSG00000285437.1;AL:chr7:102562656:102567083-102569835:102567484:102568184-102569835:-	0.119819	1.35574	0.00935128	1.20115	0.180139	1.51757	0.397511	1.93377	0.366863	11	10	PFS	TP53_BI
ENSG00000135916.16;AF:chr2:230864980:230865145-230873417:230873231:230873338-230873417:+	0.143809	1.9713	5.02114e-05	1.33507	0.181435	1.18723	0.775878	1.17307	0.802763	11	10	OS	TP53_BI
ENSG00000137343.18;SE:chr6:30640422-30640535:30640603-30642176:+	0.121184	2.08321	1.31416e-05	1.33335	0.184628	1.68225	0.390409	2.01087	0.330646	11	10	OS	TP53_BI
ENSG00000168273.8;AL:chr3:52536906-52540424:52541890:52536906-52579018:52579237:+	0.109723	1.97464	1.00461e-05	1.31949	0.196172	1.37569	0.636035	1.53966	0.658405	12	9	OS	TP53_BI
ENSG00000149091.15;RI:chr11:46378457:46378500-46378894:46379111:+	0.133819	2.02044	1.18285e-05	1.3154	0.197035	1.44947	0.554293	1.43787	0.590979	13	8	OS	TP53_BI
ENSG00000088038.19;AL:chr19:54153840-54153944:54154455:54153840-54155309:54155680:+	-0.143367	1.98563	9.30729e-06	1.31442	0.197515	1.29215	0.700646	1.29834	0.706136	13	8	OS	TP53_BI
ENSG00000105810.10;AF:chr7:92833690-92833873:92833917:92833690-92836478:92836573:-	-0.133669	1.96141	5.34454e-05	1.32067	0.197547	0.805298	0.719864	0.795035	0.726391	10	11	OS	TP53_BI
ENSG00000136856.18;AL:chr9:127404991-127405420:127405469:127404991-127407112:127407898:+	0.115317	1.34581	0.0105681	1.19122	0.199359	1.47869	0.427716	3.14904	0.150557	11	10	PFS	TP53_BI
ENSG00000137070.18;AF:chr9:34650702:34652057-34655218:34652185:34652233-34655218:+	-0.130995	1.89678	5.41135e-05	1.31647	0.199828	0.740574	0.628561	0.646538	0.580404	12	9	OS	TP53_BI
ENSG00000162804.14;SE:chr2:241082364-241087392:241087475-241088365:+	0.181279	1.98521	1.59433e-05	1.3067	0.199991	1.28259	0.687475	1.55272	0.634796	14	7	OS	TP53_BI
ENSG00000112977.16;AL:chr5:10683096:10683571-10748175:10733772:10734268-10748175:-	0.136202	2.02247	1.12941e-05	1.31487	0.202629	1.40594	0.587829	1.55258	0.600938	11	10	OS	TP53_BI
ENSG00000166508.18;RI:chr7:100099023:100099403-100099589:100099753:-	-0.104675	1.38166	0.00936353	1.18928	0.207821	2.14918	0.139704	1.32475	0.643811	8	13	PFS	TP53_BI
ENSG00000049323.16;SE:chr2:33315269-33342838:33342963-33347367:+	0.103877	2.03715	5.69567e-05	1.32529	0.209657	1.36118	0.606312	1.60471	0.557806	9	12	OS	TP53_BI
ENSG00000100811.14;SE:chr14:100274758-100276490:100276648-100277418:+	0.105564	1.94035	3.76453e-05	1.30175	0.210168	0.921892	0.892011	1.01942	0.97742	12	9	OS	TP53_BI
ENSG00000138032.21;AL:chr2:44218537-44229993:44231471:44218537-44232316:44232721:+	0.179182	1.35215	0.00854401	1.18186	0.212353	1.55543	0.389102	1.34201	0.708735	13	8	PFS	TP53_BI
ENSG00000156030.13;AF:chr14:73740255-73759763:73760298:73740255-73787102:73787258:-	-0.146869	1.9511	9.64502e-05	1.31938	0.214355	1.12113	0.848579	1.91153	0.401494	10	11	OS	TP53_BI
ENSG00000106603.19;AL:chr7:43609233:43609641-43639449:43631152:43633408-43639449:-	0.109208	1.34847	0.0133663	1.18658	0.214628	1.28406	0.608242	1.41927	0.581928	10	11	PFS	TP53_BI
ENSG00000217128.12;SE:chr5:131709272-131710578:131710661-131716565:-	0.145036	1.93306	6.48242e-05	1.30112	0.217196	0.754375	0.636784	0.778478	0.705434	10	11	OS	TP53_BI
ENSG00000143321.19;AF:chr1:156745373-156751343:156751544:156745373-156752229:156752272:-	0.211546	1.89026	9.43442e-06	1.29087	0.227323	0.738474	0.775837	0.59653	0.649751	18	3	OS	TP53_BI
ENSG00000135916.16;AF:chr2:230864980:230865145-230873417:230873231:230873338-230873417:+	0.143809	1.34019	0.0128742	1.17584	0.237455	1.24688	0.647107	1.08634	0.888169	11	10	PFS	TP53_BI
ENSG00000136856.18;AL:chr9:127404991-127405420:127405447:127404991-127407112:127407898:+	0.112161	1.92032	4.3697e-05	1.28066	0.240172	0.789611	0.694566	0.65081	0.553496	10	11	OS	TP53_BI
ENSG00000142188.17;AL:chr21:33432798:33432802-33439214:33436884:33436992-33439214:-	-0.10376	1.97802	1.00423e-05	1.28282	0.242194	1.38624	0.622695	0.930044	0.937091	14	7	OS	TP53_BI
ENSG00000133460.19;AF:chr22:23857000:23857531-23862104:23857895:23858029-23862104:+	0.11634	2.07315	4.6431e-05	1.28284	0.245673	1.13387	0.840053	0.51719	0.522794	9	12	OS	TP53_BI
ENSG00000148019.14;A3:chr9:78248873-78251905:78248873-78251908:+	-0.103288	1.89635	0.000139877	1.28612	0.245753	0.724435	0.592459	0.754542	0.660318	9	12	OS	TP53_BI
ENSG00000162804.14;SE:chr2:241082364-241087392:241087475-241088365:+	0.181279	1.33886	0.00893857	1.16658	0.246531	1.46983	0.469253	0.878052	0.8863	14	7	PFS	TP53_BI
ENSG00000133460.19;AF:chr22:23857000:23857531-23862104:23857895:23858029-23862104:+	0.11634	1.37143	0.0104144	1.172	0.246718	1.77537	0.250663	0.632675	0.589376	9	12	PFS	TP53_BI
ENSG00000102034.17;AF:chrX:130081539-130110325:130110497:130081539-130110620:130110716:-	0.145904	1.94367	8.36902e-06	1.27778	0.247242	1.26028	0.765126	0.652025	0.677075	15	6	OS	TP53_BI
ENSG00000073060.16;RI:chr12:124782683:124782811-124786357:124786503:-	0.124258	1.98193	4.52652e-05	1.27868	0.248121	0.882261	0.835539	0.440524	0.3053	9	12	OS	TP53_BI
ENSG00000143761.16;AF:chr1:228082741:228082850-228097078:228083085:228083512-228097078:+	-0.215816	2.00739	3.74459e-05	1.28163	0.251717	1.10636	0.866333	0.968651	0.959963	8	13	OS	TP53_BI
ENSG00000143761.16;AF:chr1:228082741:228082850-228097078:228088116:228088277-228097078:+	-0.214092	2.00739	3.74459e-05	1.28163	0.251717	1.10636	0.866333	0.968651	0.959963	8	13	OS	TP53_BI
ENSG00000229117.9;A5:chr12:56117211-56117482:56116799-56117482:+	0.108827	1.9635	3.21557e-05	1.2752	0.253929	1.31926	0.659914	1.2343	0.747154	12	9	OS	TP53_BI
ENSG00000106615.10;AF:chr7:151491014-151519460:151519895:151491014-151519898:151520120:-	-0.117024	1.9191	1.10582e-05	1.26985	0.255804	1.15538	0.851891	0.855869	0.862063	18	3	OS	TP53_BI
ENSG00000073060.16;RI:chr12:124782683:124782811-124786357:124786503:-	0.124258	1.35946	0.0118833	1.16663	0.25608	1.54178	0.405501	0.563954	0.493398	9	12	PFS	TP53_BI
ENSG00000143549.21;AF:chr1:154173201-154176115:154176242:154173201-154182988:154183147:-	-0.165908	1.92321	4.38517e-05	1.26785	0.256313	0.752805	0.634879	0.592277	0.429146	13	8	OS	TP53_BI
ENSG00000100811.14;SE:chr14:100274758-100276490:100276648-100277418:+	0.105564	1.33693	0.0118128	1.16285	0.258865	1.20996	0.702255	0.929095	0.910769	12	9	PFS	TP53_BI
ENSG00000143761.16;AF:chr1:228082741:228082850-228097078:228090488:228091071-228097078:+	-0.211253	1.32209	0.0229997	1.17012	0.263123	1.15836	0.770485	1.43409	0.539864	7	14	PFS	TP53_BI
ENSG00000273841.5;AF:chr5:69366595-69369387:69369477:69366595-69369657:69370013:-	-0.135158	1.31969	0.0165223	1.16433	0.26495	1.09965	0.844099	1.55358	0.472562	11	10	PFS	TP53_BI
ENSG00000173915.16;SE:chr10:103394394-103395746:103396032-103396409:-	-0.113422	1.30746	0.0240929	1.1673	0.266187	0.857674	0.758409	1.36002	0.601103	10	11	PFS	TP53_BI
ENSG00000113851.14;SE:chr3:3174261-3175163:3175266-3179621:-	-0.135586	1.90288	2.01178e-05	1.267	0.266916	0.747671	0.671428	0.39178	0.324394	13	8	OS	TP53_BI
ENSG00000285437.1;AL:chr7:102562656:102567083-102569835:102569200:102569543-102569835:-	0.102865	1.42539	0.00509705	1.28524	0.0836535	4.04543	0.0195224	13.7309	0.00139414	10	11	PFS	TP53_BI
ENSG00000135655.16;SE:chr12:62393202-62396295:62396398-62401187:+	0.113187	1.98037	2.74838e-05	1.26359	0.269304	1.05867	0.923817	1.16101	0.811975	11	10	OS	TP53_BI
ENSG00000035115.22;MX:chr2:242871-243503:243562-247538:242871-244627:244738-247538:-	-0.138668	1.30546	0.022042	1.16424	0.270927	0.942478	0.902463	1.53848	0.459546	10	11	PFS	TP53_BI
ENSG00000217128.12;SE:chr5:131709272-131710578:131710661-131716565:-	0.145036	1.32446	0.0155962	1.16119	0.271484	1.12274	0.811086	1.21639	0.735206	10	11	PFS	TP53_BI
ENSG00000135441.7;AF:chr12:55716038:55716196-55716933:55716292:55716717-55716933:+	0.155061	1.35765	0.0120818	1.1616	0.272048	1.56818	0.365921	0.572198	0.434347	9	12	PFS	TP53_BI
ENSG00000115694.15;A5:chr2:241497687-241498235:241497687-241498639:-	0.128101	1.90888	1.88026e-05	1.26112	0.273684	0.873592	0.843098	0.676132	0.602612	13	8	OS	TP53_BI
ENSG00000136856.18;AL:chr9:127404991-127405420:127405447:127404991-127407112:127407898:+	0.112161	1.32724	0.0150857	1.1582	0.275247	1.14249	0.78477	1.16455	0.831429	10	11	PFS	TP53_BI
ENSG00000162804.14;SE:chr2:241071878-241073266:241073364-241081677:+	0.179162	1.93815	3.89753e-05	1.25302	0.276685	0.902715	0.864157	0.674979	0.685139	13	8	OS	TP53_BI
ENSG00000182858.14;A3:chr22:49904066-49904179:49903879-49904179:-	0.108336	1.37226	0.00573455	1.15483	0.279702	2.16418	0.152319	2.19891	0.242367	13	8	PFS	TP53_BI
ENSG00000163584.18;A3:chr3:170868201-170868298:170868134-170868298:-	-0.102892	1.92703	4.15443e-05	1.2592	0.280654	0.850057	0.786521	0.701755	0.588508	11	10	OS	TP53_BI
ENSG00000249859.12;SE:chr8:127939676-127982360:127982479-127983904:+	0.166661	1.37619	0.00470223	1.15178	0.284524	2.75857	0.0766801	4.40696	0.102951	14	7	PFS	TP53_BI
ENSG00000135441.7;AF:chr12:55716038:55716196-55716933:55716292:55716717-55716933:+	0.155061	2.02443	6.02963e-05	1.25454	0.286463	0.886011	0.844532	0.608555	0.500655	9	12	OS	TP53_BI
ENSG00000133460.19;A3:chr22:23868641-23875085:23868641-23875121:+	-0.110707	1.33164	0.0126201	1.14993	0.295087	1.10991	0.832289	0.332065	0.206851	12	9	PFS	TP53_BI
ENSG00000162804.14;SE:chr2:241071878-241073266:241073364-241081677:+	0.179162	1.32264	0.0125863	1.14661	0.302504	1.13511	0.803099	0.391643	0.307741	13	8	PFS	TP53_BI
ENSG00000143549.21;AF:chr1:154173201-154176115:154176242:154173201-154182988:154183147:-	-0.165908	1.31153	0.016345	1.1474	0.303312	1.01323	0.978725	1.00766	0.990165	13	8	PFS	TP53_BI
ENSG00000128951.14;AF:chr15:48331095:48331191-48332268:48331429:48331795-48332268:+	-0.184106	1.36747	0.00937982	1.14844	0.308484	1.75646	0.246766	4.21368	0.0723844	10	11	PFS	TP53_BI
ENSG00000169592.15;A5:chr16:30004657-30005221:30001530-30005221:+	0.106523	1.29795	0.0241693	1.14933	0.310101	0.828416	0.696572	0.975627	0.967528	10	11	PFS	TP53_BI
ENSG00000140983.14;AF:chr16:668105:668154-668353:668180:668236-668353:+	-0.103562	1.86276	0.000112141	1.23775	0.311866	0.524258	0.282428	0.390233	0.248828	10	11	OS	TP53_BI
ENSG00000142188.17;AL:chr21:33432798:33432802-33439214:33436884:33436992-33439214:-	-0.10376	1.37338	0.00489401	1.14173	0.312093	2.28645	0.155769	1.26012	0.813826	14	7	PFS	TP53_BI
ENSG00000110066.15;AF:chr11:68190152-68213138:68213286:68190152-68213477:68213828:-	-0.121459	1.90753	5.11897e-05	1.23799	0.313129	0.895743	0.863776	0.868951	0.852983	14	7	OS	TP53_BI
ENSG00000079616.13;A3:chr16:29804065-29804576:29804065-29804814:+	0.166035	1.97001	5.11003e-05	1.23684	0.316806	1.2491	0.709664	1.1396	0.84156	12	9	OS	TP53_BI
ENSG00000131089.17;AL:chrX:63634967:63638209-63643980:63639524:63642910-63643980:-	-0.11089	1.8486	8.25377e-05	1.2318	0.31747	0.506575	0.257708	0.331591	0.104776	13	8	OS	TP53_BI
ENSG00000105810.10;AF:chr7:92833690-92833873:92833917:92833690-92836478:92836573:-	-0.133669	1.29955	0.023699	1.14635	0.31777	0.909877	0.844951	1.09036	0.880507	10	11	PFS	TP53_BI
ENSG00000137070.18;AF:chr9:34650702:34652057-34655218:34652185:34652233-34655218:+	-0.130995	1.29987	0.0211761	1.14249	0.319923	0.77745	0.602024	0.509552	0.353024	12	9	PFS	TP53_BI
ENSG00000106615.10;AF:chr7:151491014-151519460:151519895:151491014-151519898:151520120:-	-0.117024	1.34966	0.00519524	1.13786	0.322217	2.17367	0.293848	1.37077	0.718531	18	3	PFS	TP53_BI
ENSG00000105443.15;A5:chr19:48474953-48478069:48474949-48478069:+	0.15564	1.83455	4.07097e-05	1.22742	0.330574	0.376908	0.1594	0.208189	0.116116	16	5	OS	TP53_BI
ENSG00000153029.14;SE:chr1:181034074-181036997:181037112-181049052:+	-0.105295	1.35899	0.00681548	1.13761	0.331765	1.75271	0.289075	1.64944	0.443104	13	8	PFS	TP53_BI
ENSG00000184220.12;SE:chr3:99818043-100051232:100051306-100146973:+	-0.137427	1.28597	0.0229304	1.13902	0.331943	0.667038	0.409215	0.655311	0.565788	14	7	PFS	TP53_BI
ENSG00000054654.19;SE:chr14:64081580-64087419:64087487-64087671:+	-0.10266	1.82168	0.000161127	1.22844	0.336044	0.622663	0.429573	0.722299	0.670147	12	9	OS	TP53_BI
ENSG00000074603.19;AF:chr15:65512564-65515656:65517273:65512564-65517486:65517663:-	0.102145	1.34122	0.014456	1.13983	0.338872	1.3292	0.559265	2.86087	0.128042	10	11	PFS	TP53_BI
ENSG00000052723.12;A5:chr1:114779284-114780110:114779284-114780449:-	0.100256	1.95575	3.32576e-05	1.22165	0.341258	0.94898	0.929966	0.722201	0.673492	12	9	OS	TP53_BI
ENSG00000164104.12;A5:chr4:173333669-173334246:173333669-173334272:-	0.113608	1.92918	2.61075e-05	1.21868	0.34188	0.933756	0.912924	0.754053	0.694232	16	5	OS	TP53_BI
ENSG00000148019.14;A3:chr9:78248873-78251905:78248873-78251908:+	-0.103288	1.29458	0.0279841	1.13775	0.34684	0.743097	0.545883	0.782829	0.668756	9	12	PFS	TP53_BI
ENSG00000182165.18;A5:chr7:87341684-87345043:87341684-87345305:-	-0.104845	1.86473	0.000111906	1.21558	0.349265	0.555594	0.326163	0.460622	0.249154	12	9	OS	TP53_BI
ENSG00000116678.20;AL:chr1:65622981-65633152:65635428:65622981-65636191:65641559:+	0.129736	1.2894	0.0450805	1.14256	0.353636	0.711126	0.588438	1.31148	0.733049	4	17	PFS	TP53_BI
ENSG00000131089.17;AL:chrX:63634967:63638209-63643980:63639524:63642910-63643980:-	-0.11089	1.29452	0.0204951	1.13109	0.355244	0.777132	0.61191	0.624448	0.474333	13	8	PFS	TP53_BI
ENSG00000249915.8;AF:chr5:271661:271821-304177:272712:272772-304177:+	0.116553	1.87453	6.6e-05	1.21011	0.36003	0.652481	0.47582	0.844501	0.819412	13	8	OS	TP53_BI
ENSG00000130731.16;SE:chr16:634797-634889:634956-635612:-	0.116719	1.87297	0.000105679	1.21416	0.362035	0.71312	0.573957	0.599401	0.459625	12	9	OS	TP53_BI
ENSG00000168958.20;MX:chr2:227340380-227347226:227347384-227355677:227340380-227352514:227352573-227355677:+	0.11058	1.33425	0.00949454	1.12704	0.36323	1.27653	0.650709	1.23431	0.734346	14	7	PFS	TP53_BI
ENSG00000102034.17;AF:chrX:130081539-130110325:130110497:130081539-130110620:130110716:-	0.145904	1.34595	0.00625114	1.12596	0.364219	1.7959	0.347163	0.678383	0.713002	15	6	PFS	TP53_BI
ENSG00000088038.19;AL:chr19:54153840-54153944:54154455:54153840-54155309:54155680:+	-0.143367	1.34414	0.00832575	1.12695	0.364506	1.5818	0.387953	1.83983	0.328541	13	8	PFS	TP53_BI
ENSG00000135655.16;SE:chr12:62393202-62396295:62396398-62401187:+	0.113187	1.35783	0.0079414	1.1262	0.368941	1.60604	0.346895	1.19818	0.757153	11	10	PFS	TP53_BI
ENSG00000148484.18;SE:chr10:16782084-16816973:16817084-16817315:-	0.122626	1.33458	0.0094655	1.12515	0.36948	1.37179	0.549271	1.33571	0.618017	14	7	PFS	TP53_BI
ENSG00000241370.6;RI:chr6:30345298:30345398-30345467:30345573:+	0.157028	1.92601	6.94012e-05	1.20468	0.372111	0.736869	0.608108	0.771277	0.71166	12	9	OS	TP53_BI
ENSG00000114062.22;SE:chr15:25405502-25407067:25407262-25409088:-	0.11346	1.98591	2.6385e-05	1.20435	0.3772	1.06661	0.91409	0.16554	0.165338	12	9	OS	TP53_BI
ENSG00000133460.19;A3:chr22:23868641-23875085:23868641-23875121:+	-0.110707	1.866	0.000110736	1.19884	0.381039	0.568142	0.349748	0.159094	0.0723243	12	9	OS	TP53_BI
ENSG00000128609.15;SE:chr7:123545676-123550470:123550586-123557404:-	-0.176554	1.873	4.28162e-05	1.19908	0.38129	0.660016	0.502085	0.576395	0.433975	15	6	OS	TP53_BI
ENSG00000231074.9;A5:chr6:30296237-30326009:30296237-30326151:-	-0.146005	1.30548	0.0176515	1.12453	0.382054	0.832551	0.71581	2.38013	0.230357	14	7	PFS	TP53_BI
ENSG00000013561.18;AF:chr5:141969151:141969167-141970704:141969269:141969617-141970704:+	-0.102959	1.88918	0.000147521	1.20474	0.382576	0.750182	0.633464	0.688499	0.559293	10	11	OS	TP53_BI
ENSG00000150967.18;SE:chr12:122940284-122940807:122940995-122944391:-	-0.207393	1.8369	9.08499e-05	1.20154	0.384755	0.460243	0.226024	0.268948	0.0925969	12	9	OS	TP53_BI
ENSG00000185104.20;SE:chr1:50441523-50451793:50452193-50475464:-	-0.155635	1.84354	8.59256e-05	1.19789	0.388395	0.550886	0.338522	0.394859	0.251411	12	9	OS	TP53_BI
ENSG00000114062.22;SE:chr15:25405502-25407067:25407262-25409088:-	0.11346	1.36233	0.00748913	1.11939	0.392871	1.74765	0.269185	0.249291	0.234507	12	9	PFS	TP53_BI
ENSG00000140983.14;AF:chr16:668105:668154-668353:668180:668236-668353:+	-0.103562	1.28507	0.028358	1.12144	0.395712	0.722001	0.502085	0.56913	0.482061	10	11	PFS	TP53_BI
ENSG00000187231.14;A5:chr2:179115256-179116574:179115256-179116668:-	-0.154523	1.33052	0.0113011	1.11805	0.396658	1.22419	0.687963	1.19091	0.806183	14	7	PFS	TP53_BI
ENSG00000073060.16;A5:chr12:124778586-124782683:124778586-124786357:-	0.108968	1.84686	8.38504e-05	1.18989	0.402578	0.464194	0.204138	0.479295	0.24774	13	8	OS	TP53_BI
ENSG00000249915.8;A5:chr5:306754-311293:304221-311293:+	0.117159	1.92603	0.000112737	1.19041	0.406167	0.74209	0.629339	0.829781	0.818078	9	12	OS	TP53_BI
ENSG00000205352.11;AF:chr12:53441732:53441792-53442695:53441795:53442586-53442695:+	-0.173476	1.89715	8.77747e-05	1.18842	0.406691	0.660975	0.494433	0.684215	0.63663	13	8	OS	TP53_BI
ENSG00000213999.17;A3:chr19:19146384-19146555:19146022-19146555:-	0.115771	1.31217	0.0181296	1.11834	0.40999	0.964704	0.941019	2.21158	0.296935	10	11	PFS	TP53_BI
ENSG00000137343.18;SE:chr6:30640422-30640535:30640603-30642176:+	0.121184	1.33965	0.0129673	1.11528	0.413343	1.4624	0.434345	1.47304	0.542811	11	10	PFS	TP53_BI
ENSG00000143321.19;AF:chr1:156745373-156751343:156751544:156745373-156752229:156752272:-	0.211546	1.31043	0.00952821	1.11061	0.419038	0.74791	0.705903	0.775851	0.815868	18	3	PFS	TP53_BI
ENSG00000100614.18;AF:chr14:60245785:60246046-60282684:60249221:60249677-60282684:+	-0.259578	1.82577	6.73448e-05	1.18119	0.420297	0.427728	0.190834	0.321491	0.133686	16	5	OS	TP53_BI
ENSG00000168273.8;AL:chr3:52536906-52540424:52541890:52536906-52579018:52579237:+	0.109723	1.32537	0.0121133	1.10992	0.427386	1.15214	0.779159	0.860023	0.862052	12	9	PFS	TP53_BI
ENSG00000182165.18;A5:chr7:87341684-87345043:87341684-87345305:-	-0.104845	1.2806	0.0271534	1.11064	0.429625	0.626927	0.340299	0.260302	0.0559151	12	9	PFS	TP53_BI
ENSG00000049323.16;SE:chr2:33315269-33342838:33342963-33347367:+	0.103877	1.32243	0.0202724	1.11325	0.430262	1.11296	0.829163	1.84453	0.457304	9	12	PFS	TP53_BI
ENSG00000229117.9;A5:chr12:56117211-56117482:56116799-56117482:+	0.108827	1.31242	0.0161651	1.10979	0.43274	0.972986	0.95559	1.06452	0.912837	12	9	PFS	TP53_BI
ENSG00000130731.16;SE:chr16:634797-634889:634956-635612:-	0.116719	1.31908	0.0147896	1.1099	0.432789	1.04459	0.929312	1.12855	0.833451	12	9	PFS	TP53_BI
ENSG00000164104.12;A5:chr4:173333669-173334246:173333669-173334272:-	0.113608	1.33126	0.00876003	1.10574	0.43838	1.34923	0.597374	0.534608	0.37175	16	5	PFS	TP53_BI
ENSG00000128609.15;SE:chr7:123545676-123550470:123550586-123557404:-	-0.176554	1.32501	0.0108131	1.10437	0.444996	1.18417	0.749941	0.921723	0.908665	15	6	PFS	TP53_BI
ENSG00000149091.15;RI:chr11:46378457:46378500-46378894:46379111:+	0.133819	1.31966	0.0146825	1.10484	0.44913	1.057	0.909865	1.05638	0.923726	13	8	PFS	TP53_BI
ENSG00000079616.13;A3:chr16:29804065-29804576:29804065-29804814:+	0.166035	1.3246	0.0137675	1.10452	0.453216	1.12686	0.808179	0.805094	0.713773	12	9	PFS	TP53_BI
ENSG00000156030.13;AF:chr14:73740255-73759763:73760298:73740255-73787102:73787258:-	-0.146869	1.29868	0.0265851	1.1075	0.455735	0.831647	0.712065	2.8277	0.173783	10	11	PFS	TP53_BI
ENSG00000112977.16;AL:chr5:10683096:10683571-10748175:10733772:10734268-10748175:-	0.136202	1.31563	0.0154699	1.10447	0.455789	1.04801	0.924359	1.08204	0.911682	11	10	PFS	TP53_BI
ENSG00000115053.16;AF:chr2:231463316-231464160:231464199:231463316-231482684:231483641:-	-0.157387	1.89043	0.000232484	1.17159	0.456916	0.57162	0.398224	0.523697	0.40145	9	12	OS	TP53_BI
ENSG00000115694.15;A5:chr2:241497687-241498235:241497687-241498639:-	0.128101	1.31037	0.0132819	1.10238	0.457939	0.909672	0.859299	0.738606	0.696033	13	8	PFS	TP53_BI
ENSG00000066136.20;AF:chr1:40692290:40692347-40738836:40709357:40709616-40738836:+	-0.112694	1.84688	0.000202731	1.16869	0.459579	0.657513	0.482256	0.717096	0.623422	11	10	OS	TP53_BI
ENSG00000115310.18;AF:chr2:54987698-55010087:55010449:54987698-55049745:55050544:-	0.100431	1.29527	0.0276698	1.10541	0.460777	0.708222	0.505984	1.32463	0.675394	10	11	PFS	TP53_BI
ENSG00000179454.14;SE:chr14:44945928-44953623:44953709-44961846:-	-0.100709	1.86566	0.000281006	1.16165	0.479791	0.64524	0.478673	0.659141	0.569259	11	10	OS	TP53_BI
ENSG00000077454.16;AL:chr7:100574011:100574356-100575705:100574709:100575304-100575705:-	-0.173442	1.27788	0.0309335	1.09962	0.480484	0.609295	0.322418	2.75453	0.221576	12	9	PFS	TP53_BI
ENSG00000110066.15;AF:chr11:68190152-68213138:68213286:68190152-68213477:68213828:-	-0.121459	1.29888	0.0173793	1.09769	0.480731	0.787573	0.636013	0.934069	0.919517	14	7	PFS	TP53_BI
ENSG00000113851.14;SE:chr3:3174261-3175163:3175266-3179621:-	-0.135586	1.30468	0.0160558	1.09438	0.490206	0.921917	0.872075	0.775591	0.769182	13	8	PFS	TP53_BI
ENSG00000052723.12;A5:chr1:114779284-114780110:114779284-114780449:-	0.100256	1.31411	0.0158119	1.0909	0.507997	1.11093	0.8327	0.845103	0.823763	12	9	PFS	TP53_BI
ENSG00000143761.16;AF:chr1:228082741:228082850-228097078:228083085:228083512-228097078:+	-0.215816	1.3006	0.0260397	1.0914	0.514724	0.907394	0.844547	1.03709	0.950686	8	13	PFS	TP53_BI
ENSG00000143761.16;AF:chr1:228082741:228082850-228097078:228088116:228088277-228097078:+	-0.214092	1.3006	0.0260397	1.0914	0.514724	0.907394	0.844547	1.03709	0.950686	8	13	PFS	TP53_BI
ENSG00000013561.18;AF:chr5:141969151:141969167-141970704:141969269:141969617-141970704:+	-0.102959	1.30494	0.0221508	1.0907	0.515394	0.826654	0.69715	0.763771	0.639728	10	11	PFS	TP53_BI
ENSG00000179454.14;SE:chr14:44945928-44953623:44953709-44961846:-	-0.100709	1.29323	0.0255531	1.0853	0.540052	0.813103	0.672349	0.951822	0.937184	11	10	PFS	TP53_BI
ENSG00000163584.18;A3:chr3:170868201-170868298:170868134-170868298:-	-0.102892	1.30249	0.020503	1.0839	0.540264	0.84964	0.73615	0.580773	0.365031	11	10	PFS	TP53_BI
ENSG00000105443.15;A5:chr19:48474953-48478069:48474949-48478069:+	0.15564	1.28169	0.0200557	1.08092	0.548753	0.545867	0.260165	0.41338	0.346143	16	5	PFS	TP53_BI
ENSG00000064225.12;AF:chr3:98732255:98732532-98768430:98763321:98763431-98768430:+	0.260685	1.82653	0.000100845	1.13025	0.550167	0.457886	0.202711	0.0871773	0.0248762	14	7	OS	TP53_BI
ENSG00000100614.18;AF:chr14:60245785:60246046-60282684:60249221:60249677-60282684:+	-0.259578	1.29219	0.0172086	1.07945	0.553208	0.669244	0.453908	0.366435	0.205219	16	5	PFS	TP53_BI
ENSG00000241370.6;RI:chr6:30345298:30345398-30345467:30345573:+	0.157028	1.30031	0.0189253	1.0761	0.573565	0.885434	0.805057	0.692997	0.542946	12	9	PFS	TP53_BI
ENSG00000249915.8;A5:chr5:306754-311293:304221-311293:+	0.117159	1.29725	0.0243664	1.07611	0.577423	0.866769	0.767408	0.731969	0.657402	9	12	PFS	TP53_BI
ENSG00000073060.16;A5:chr12:124778586-124782683:124778586-124786357:-	0.108968	1.29034	0.0195813	1.07406	0.581953	0.720015	0.51676	0.687887	0.511386	13	8	PFS	TP53_BI
ENSG00000185104.20;SE:chr1:50441523-50451793:50452193-50475464:-	-0.155635	1.28334	0.0237689	1.07361	0.584469	0.57203	0.272024	0.289543	0.112996	12	9	PFS	TP53_BI
ENSG00000054654.19;SE:chr14:64081580-64087419:64087487-64087671:+	-0.10266	1.26207	0.0346795	1.0744	0.587722	0.440587	0.12061	0.917997	0.895088	12	9	PFS	TP53_BI
ENSG00000205352.11;AF:chr12:53441732:53441792-53442695:53441795:53442586-53442695:+	-0.173476	1.29215	0.0211084	1.07272	0.590886	0.728426	0.51797	0.497202	0.311951	13	8	PFS	TP53_BI
ENSG00000249915.8;AF:chr5:271661:271821-304177:272712:272772-304177:+	0.116553	1.27978	0.0226717	1.07154	0.595398	0.59313	0.334771	0.673911	0.5635	13	8	PFS	TP53_BI
ENSG00000066136.20;AF:chr1:40692290:40692347-40738836:40709357:40709616-40738836:+	-0.112694	1.27663	0.0285979	1.07091	0.603985	0.558371	0.266988	0.546948	0.343387	11	10	PFS	TP53_BI
ENSG00000150967.18;SE:chr12:122940284-122940807:122940995-122944391:-	-0.207393	1.27103	0.0307865	1.06614	0.624066	0.527188	0.206636	0.41008	0.214521	12	9	PFS	TP53_BI
ENSG00000115053.16;AF:chr2:231463316-231464160:231464199:231463316-231482684:231483641:-	-0.157387	1.27361	0.0359021	1.0588	0.666512	0.631087	0.363531	0.550946	0.355946	9	12	PFS	TP53_BI
ENSG00000064225.12;AF:chr3:98732255:98732532-98768430:98763321:98763431-98768430:+	0.260685	1.27565	0.0240239	1.05592	0.672995	0.442009	0.141383	0.036335	0.00266319	14	7	PFS	TP53_BI
ENSG00000005801.18;MX:chr11:3360565-3360720:3360788-3370975:3360565-3361743:3368855-3370975:-	0.100468	0.431672	0.299799	0.273042	0.154785	0.22751	0.147315	0.0570298	0.0306734	15	11	OS	t(14;16)
ENSG00000006125.18;SE:chr17:35657791-35670857:35670898-35671754:+	-0.104043	0.89827	0.774155	0.422743	0.0875839	0.28413	0.0226751	0.265011	0.0539164	15	11	PFS	t(14;16)
ENSG00000054654.19;A3:chr14:64220637-64221534:64220637-64221576:+	0.187592	0.183355	0.145442	0.0888376	0.0281407	0.0717549	0.0749573	0.025446	0.0193319	14	12	OS	t(14;16)
ENSG00000064225.12;AF:chr3:98732704:98733011-98768430:98763321:98763431-98768430:+	0.176413	1.98475	0.042301	1.38568	0.505968	2.21784	0.126599	2.71039	0.110435	13	13	PFS	t(14;16)
ENSG00000070081.17;AF:chr11:17276739:17276828-17282789:17277023:17277095-17282789:+	0.169042	2.0073	0.00835244	3.43558	0.0594263	6.29558	0.0434389	7.16509	0.0375413	19	7	PFS	t(14;16)
ENSG00000070081.17;AF:chr11:17276741:17276828-17282789:17277023:17277095-17282789:+	0.125332	1.93662	0.0193092	2.08452	0.187164	2.71664	0.105255	2.50268	0.176229	16	10	PFS	t(14;16)
ENSG00000077380.16;AF:chr2:171687409:171687627-171690147:171687672:171687873-171690147:+	0.10053	2.08201	0.0222629	2.43014	0.0721116	2.42534	0.0824577	2.59287	0.117152	13	13	PFS	t(14;16)
ENSG00000077684.16;AF:chr4:128809703:128809877-128831733:128811326:128811403-128831733:+	-0.15835	1.01115	0.972003	0.223504	0.0037202	0.242818	0.00825623	0.102158	0.00487314	19	7	PFS	t(14;16)
ENSG00000079805.17;AL:chr19:10830378-10830978:10831884:10830378-10832304:10833484:+	0.152037	2.21881	0.170475	3.79235	0.11898	4.7668	0.124584	16.0168	0.0464839	11	15	OS	t(14;16)
ENSG00000088367.23;SE:chr20:36112480-36125423:36125527-36175551:+	0.137976	2.15341	0.129543	4.65251	0.0919063	13.0453	0.0876253	52.0609	0.0129179	11	15	OS	t(14;16)
ENSG00000100083.19;AF:chr22:37608845:37608903-37614190:37612536:37613191-37614190:+	0.100965	1.85794	0.0428114	2.40364	0.081339	1.77457	0.282137	2.36475	0.205533	14	12	PFS	t(14;16)
ENSG00000100364.18;AF:chr22:45212107-45226780:45226903:45212107-45235249:45235413:-	0.181321	1.655	0.0639522	1.33329	0.645403	2.57202	0.201808	15.7316	0.0171368	22	4	PFS	t(14;16)
ENSG00000100364.18;AF:chr22:45212107-45226780:45226903:45212107-45240640:45240769:-	0.176444	1.655	0.0639522	1.33329	0.645403	2.57202	0.201808	15.7316	0.0171368	22	4	PFS	t(14;16)
ENSG00000100445.17;MX:chr14:24440926-24441674:24441795-24442346:24440926-24442178:24442260-24442346:-	-0.102082	0.952733	0.890366	0.315074	0.0193893	0.281831	0.0184751	0.158137	0.00953607	16	10	PFS	t(14;16)
ENSG00000100650.16;AF:chr14:69767116:69767255-69768138:69767940:69767987-69768138:+	0.107084	2.3801	0.0873534	4.81182	0.0849102	15.2754	0.0627331	29.8536	0.0271741	12	14	OS	t(14;16)
ENSG00000100650.16;AF:chr14:69767116:69767255-69768138:69767940:69767987-69768138:+	0.107084	2.26125	0.0158342	1.78402	0.248422	2.60305	0.0571052	4.822	0.0591767	12	14	PFS	t(14;16)
ENSG00000100650.16;AF:chr14:69767182:69767380-69768138:69767940:69767987-69768138:+	0.214116	1.80191	0.240003	2.60425	0.293824	11.2008	0.12073	27.0277	0.043285	16	10	OS	t(14;16)
ENSG00000100650.16;AF:chr14:69767240:69767380-69768138:69767940:69767987-69768138:+	0.115952	2.12774	0.034721	1.49017	0.428826	2.14525	0.125178	3.61995	0.167255	11	15	PFS	t(14;16)
ENSG00000100804.19;AL:chr14:23016543:23016635-23033368:23026297:23026375-23033368:-	0.127422	1.90082	0.0359842	1.59356	0.358942	1.91802	0.219626	1.94696	0.325677	13	13	PFS	t(14;16)
ENSG00000101294.18;AL:chr20:31566295-31568078:31568211:31566295-31569120:31569308:+	-0.118165	1.85785	0.0349838	2.24781	0.126077	2.84813	0.0985955	2.77197	0.182624	16	10	PFS	t(14;16)
ENSG00000101751.10;AF:chr18:54269592:54271485-54273926:54272170:54272242-54273926:+	-0.162219	1.89188	0.0740759	1.33489	0.559002	1.89443	0.20153	6.75947	0.0157207	12	14	PFS	t(14;16)
ENSG00000102349.18;SE:chrX:56265744-56268913:56268991-56269378:+	-0.115313	1.93149	0.0199172	2.80551	0.063437	2.88639	0.0882755	7.46693	0.0401309	15	11	PFS	t(14;16)
ENSG00000102901.13;SE:chr16:67832108-67832228:67832354-67832455:-	0.101799	0.191406	0.174554	0.0981079	0.043503	0.0887545	0.109965	0.0552368	0.0953766	13	13	OS	t(14;16)
ENSG00000108312.15;AF:chr17:44218296-44219009:44219121:44218296-44220740:44220963:-	-0.139935	0.182725	0.144387	0.146349	0.101028	0.0740726	0.0799567	0.0282657	0.0216264	14	12	OS	t(14;16)
ENSG00000108946.15;AF:chr17:68512379:68512579-68515394:68512882:68512978-68515394:+	0.160475	1.18094	0.600126	0.683364	0.452227	0.497687	0.200784	0.241483	0.0427245	17	9	PFS	t(14;16)
ENSG00000111481.10;AF:chr12:54325151:54325181-54340547:54325584:54325682-54340547:+	0.103999	1.70833	0.284941	3.2382	0.191681	9.44856	0.152236	32.2591	0.0406163	15	11	OS	t(14;16)
ENSG00000112715.24;AF:chr6:43771083:43771312-43774341:43771992:43772101-43774341:+	-0.197031	0.185077	0.148367	0.100643	0.0400006	0.0717549	0.0749573	0.0242412	0.0213322	14	12	OS	t(14;16)
ENSG00000114956.20;A3:chr2:73946906-73950601:73946906-73950627:+	-0.126604	1.98259	0.0156869	2.87593	0.0571242	3.51459	0.0474734	5.15117	0.0519768	16	10	PFS	t(14;16)
ENSG00000117118.10;AF:chr1:17044888-17045141:17045219:17044888-17053948:17054032:-	-0.145222	0.179468	0.153413	0.144323	0.109622	0.08029	0.0917287	0.0247764	0.0186099	13	13	OS	t(14;16)
ENSG00000117616.18;AF:chr1:25247029-25247309:25247457:25247029-25337040:25338165:-	0.238909	0.192824	0.17709	0.0962219	0.041462	0.0920114	0.117036	0.0264927	0.0322934	13	13	OS	t(14;16)
ENSG00000117616.18;SE:chr1:25244224-25244454:25244498-25245150:-	-0.238909	0.192824	0.17709	0.0962219	0.041462	0.0920114	0.117036	0.0264927	0.0322934	13	13	OS	t(14;16)
ENSG00000121350.16;SE:chr12:21456095-21456865:21457086-21461025:+	-0.109855	0.185356	0.180536	0.116245	0.0773671	0.081952	0.0962506	0.0238915	0.0380756	12	14	OS	t(14;16)
ENSG00000123349.14;A5:chr12:53296551-53297850:53296467-53297850:+	0.10525	2.00097	0.169108	5.74681	0.0469092	12.4549	0.0917287	39.3657	0.039431	13	13	OS	t(14;16)
ENSG00000124523.16;A5:chr6:13574744-13579451:13574624-13579451:+	-0.102241	0.176643	0.148484	0.0844199	0.028907	0.0744131	0.0798244	0.0203517	0.0202038	13	13	OS	t(14;16)
ENSG00000125821.13;SE:chr20:18596241-18620067:18620113-18628127:+	0.120033	0.178384	0.151515	0.131771	0.0896855	0.0761459	0.0835416	0.0312396	0.029945	13	13	OS	t(14;16)
ENSG00000128915.12;AF:chr15:60478069-60478568:60478929:60478069-60479003:60479073:-	-0.111715	1.67058	0.371006	2.01215	0.413018	3.06232	0.276416	14.0817	0.0455411	13	13	OS	t(14;16)
ENSG00000129197.14;AL:chr17:5426299-5428071:5431484:5426299-5432542:5432876:+	-0.103062	0.205404	0.199702	0.111858	0.0610578	0.0998339	0.134567	0.0297502	0.0373217	13	13	OS	t(14;16)
ENSG00000129625.13;AF:chr5:112921256-112921720:112921997:112921256-112922073:112922227:-	-0.100886	3.39488	0.0385443	4.83649	0.0718546	6.68412	0.0643042	38.3703	0.014631	8	18	OS	t(14;16)
ENSG00000131018.24;SE:chr6:152294127-152300641:152300781-152301869:-	0.123202	0.186039	0.181825	0.097592	0.0507832	0.0905546	0.114994	0.0225624	0.041209	12	14	OS	t(14;16)
ENSG00000131018.24;SE:chr6:152294127-152300641:152300781-152301869:-	0.123202	0.832575	0.676425	0.308518	0.0244	0.409891	0.0956586	0.29571	0.0694266	12	14	PFS	t(14;16)
ENSG00000132376.20;SE:chr17:1509799-1513453:1513554-1513872:-	0.141949	2.08827	0.0219096	1.63569	0.316985	3.14173	0.0480806	3.51017	0.0661188	15	11	PFS	t(14;16)
ENSG00000132507.18;AF:chr17:7307993:7308133-7309615:7308371:7308575-7309615:+	-0.118291	0.17487	0.131156	0.0923799	0.0312698	0.0622091	0.0570958	0.0449035	0.0592334	14	12	OS	t(14;16)
ENSG00000135090.14;AF:chr12:118266759-118359506:118359720:118266759-118372648:118372907:-	0.100546	0.914092	0.823716	0.32559	0.0264778	0.383034	0.0763424	0.228095	0.0948817	13	13	PFS	t(14;16)
ENSG00000135341.18;SE:chr6:90536401-90544552:90544632-90547258:-	0.131092	2.27824	0.104123	4.97248	0.0703825	12.4549	0.0917287	34.8806	0.0341657	13	13	OS	t(14;16)
ENSG00000135390.21;AF:chr12:53672645-53676053:53676082:53672645-53676176:53676728:-	-0.162561	2.14832	0.0126947	1.64534	0.328888	3.15492	0.0331694	4.25365	0.0418787	15	11	PFS	t(14;16)
ENSG00000135506.16;SE:chr12:57719182-57720099:57720263-57720406:+	-0.127004	2.20613	0.117865	5.53344	0.0521134	13.4385	0.0798244	44.4901	0.02081	13	13	OS	t(14;16)
ENSG00000137074.20;SE:chr9:32987731-32988083:32988129-32989759:-	0.137688	0.425676	0.285726	0.16037	0.0399977	0.211861	0.128014	0.208253	0.192826	16	10	OS	t(14;16)
ENSG00000137504.13;A5:chr11:85663601-85663698:85663601-85663815:-	0.173102	0.178618	0.151935	0.108113	0.0564207	0.0756658	0.0823554	0.0253145	0.0338731	13	13	OS	t(14;16)
ENSG00000137504.13;A5:chr11:85663601-85663698:85663601-85663815:-	0.173102	0.794109	0.566408	0.354159	0.0399783	0.24226	0.00985831	0.132165	0.00743641	13	13	PFS	t(14;16)
ENSG00000138286.15;A5:chr10:73235318-73239312:73234940-73239312:+	0.100544	0.192492	0.176485	0.103107	0.0497249	0.08029	0.0917287	0.0269389	0.0441122	13	13	OS	t(14;16)
ENSG00000139132.14;AF:chr12:32502160:32502338-32564137:32534324:32534498-32564137:+	0.107319	3.78739	0.0100095	7.64707	0.0241881	28.6937	0.0199159	51.5756	0.0132051	10	16	OS	t(14;16)
ENSG00000140043.11;A5:chr14:73852004-73858816:73851943-73858816:+	0.163625	0.195303	0.18154	0.1729	0.156982	0.0920114	0.117036	0.0447952	0.0467046	13	13	OS	t(14;16)
ENSG00000145545.12;SE:chr5:6633869-6651842:6652008-6656078:+	0.167708	0.666425	0.401622	0.29746	0.0288884	0.313398	0.0392022	0.307301	0.069631	12	14	PFS	t(14;16)
ENSG00000145779.8;AF:chr5:119268692:119268907-119392816:119356019:119356121-119392816:+	-0.139759	2.17979	0.0211513	1.64325	0.319706	2.22497	0.108678	8.5618	0.010757	11	15	PFS	t(14;16)
ENSG00000148484.18;SE:chr10:16782084-16816973:16817084-16817315:-	0.118981	0.199919	0.159807	0.123992	0.0606977	0.0766562	0.0876253	0.0275838	0.034196	15	11	OS	t(14;16)
ENSG00000149929.16;A5:chr16:29993808-29993906:29993808-29994648:-	-0.10224	2.09645	0.011926	2.21063	0.132474	3.7816	0.0341991	6.77786	0.0390572	16	10	PFS	t(14;16)
ENSG00000152601.17;AF:chr3:152268040:152269092-152299405:152298982:152299254-152299405:+	-0.34727	2.14008	0.0133385	2.39887	0.0843538	4.23198	0.0244136	4.84144	0.0413344	15	11	PFS	t(14;16)
ENSG00000154978.13;AL:chr7:55436056:55436174-55492282:55472754:55473045-55492282:-	0.123053	1.6719	0.0791011	1.27676	0.647438	1.81802	0.29159	9.56559	0.0110017	18	8	PFS	t(14;16)
ENSG00000155974.12;SE:chr12:66371927-66377017:66377061-66377174:-	-0.165323	1.10748	0.759613	0.409607	0.0708855	0.469291	0.149948	0.176173	0.0422817	15	11	PFS	t(14;16)
ENSG00000160226.16;AF:chr21:44337667-44338234:44338784:44337667-44339118:44339393:-	0.153118	1.8274	0.295527	2.19122	0.364325	3.41576	0.229494	28.4904	0.020654	12	14	OS	t(14;16)
ENSG00000160226.16;RI:chr21:44330463:44330916-44331843:44332014:-	0.153118	1.8274	0.295527	2.19122	0.364325	3.41576	0.229494	28.4904	0.020654	12	14	OS	t(14;16)
ENSG00000160953.16;AF:chr19:1354972:1355020-1357009:1356290:1356449-1357009:+	-0.107715	1.01297	0.97461	0.641452	0.385222	0.544112	0.23625	0.217643	0.0451161	12	14	PFS	t(14;16)
ENSG00000160991.16;AF:chr7:102433106:102433355-102436225:102433575:102433661-102436225:+	-0.117155	0.207625	0.221583	0.118079	0.0802101	0.1015	0.139071	0.0244258	0.0427578	12	14	OS	t(14;16)
ENSG00000161265.15;A3:chr19:35744981-35745125:35744421-35745125:-	-0.12289	1.99533	0.171221	6.34514	0.034709	13.4385	0.0798244	40.2259	0.0376999	13	13	OS	t(14;16)
ENSG00000163660.12;AL:chr3:157146508:157146607-157149287:157148316:157148589-157149287:-	-0.166801	0.188131	0.140049	0.10435	0.0383514	0.0628563	0.0597477	0.0220135	0.0267076	15	11	OS	t(14;16)
ENSG00000163660.12;AL:chr3:157146508:157146607-157149287:157148316:157148589-157149287:-	-0.166801	0.928759	0.843438	0.386351	0.054875	0.399312	0.0659937	0.174116	0.0418802	15	11	PFS	t(14;16)
ENSG00000163812.15;A3:chr3:44926847-44929306:44918143-44929306:-	-0.112705	1.94339	0.250604	3.07575	0.186698	3.78808	0.194937	22.4002	0.0338454	12	14	OS	t(14;16)
ENSG00000164924.18;SE:chr8:100925039-100948596:100948900-100951929:-	0.112229	1.25321	0.477492	0.540887	0.226152	0.779862	0.633903	0.136106	0.0256784	17	9	PFS	t(14;16)
ENSG00000164941.14;A3:chr8:94836631-94838463:94836631-94838494:+	-0.157346	0.194604	0.138268	0.0850819	0.0177708	0.0608484	0.0592775	0.0214691	0.0367336	16	10	OS	t(14;16)
ENSG00000164941.14;A3:chr8:94836631-94838463:94836631-94838494:+	-0.157346	1	1	0.310621	0.0168767	0.37573	0.0614206	0.143896	0.0206929	16	10	PFS	t(14;16)
ENSG00000164941.14;A5:chr8:94865700-94866158:94865690-94866158:+	0.121482	0.188887	0.141299	0.0838799	0.0200134	0.0643192	0.0624015	0.0227564	0.0378668	15	11	OS	t(14;16)
ENSG00000164941.14;A5:chr8:94865700-94866158:94865690-94866158:+	0.121482	1.01911	0.957127	0.332757	0.0245841	0.39419	0.0763874	0.172426	0.0268251	15	11	PFS	t(14;16)
ENSG00000164941.14;RI:chr8:94867140:94867196-94867276:94867337:+	0.127906	0.188887	0.141299	0.0838799	0.0200134	0.0643192	0.0624015	0.0227564	0.0378668	15	11	OS	t(14;16)
ENSG00000164941.14;RI:chr8:94867140:94867196-94867276:94867337:+	0.127906	1.01911	0.957127	0.332757	0.0245841	0.39419	0.0763874	0.172426	0.0268251	15	11	PFS	t(14;16)
ENSG00000165046.13;A3:chr8:38388030-38392542:38388030-38392613:+	-0.10683	0.192858	0.147923	0.120713	0.0566225	0.0707598	0.07537	0.0228923	0.0153359	15	11	OS	t(14;16)
ENSG00000165417.12;AF:chr14:81216514-81220489:81220952:81216514-81221144:81221377:-	-0.158169	0.42835	0.284248	0.173319	0.047194	0.202084	0.117897	0.0811564	0.0902326	17	9	OS	t(14;16)
ENSG00000167460.17;AL:chr19:16093753-16095264:16096744:16093753-16101264:16102952:+	0.118262	1.2457	0.534965	1.11661	0.823155	0.758561	0.578308	0.130236	0.0307718	13	13	PFS	t(14;16)
ENSG00000168488.18;A3:chr16:28836485-28836728:28836485-28836748:+	0.106222	1.89837	0.0288961	1.63502	0.352493	2.2672	0.145671	3.37594	0.0956127	16	10	PFS	t(14;16)
ENSG00000169592.15;A5:chr16:30004657-30005221:30001530-30005221:+	0.13861	2.22493	0.169164	3.16766	0.175072	5.59626	0.09363	12.6783	0.0311074	11	15	OS	t(14;16)
ENSG00000175061.18;A3:chr17:16439414-16439528:16439414-16439581:+	-0.101681	0.784709	0.514909	0.237172	0.00336476	0.0884411	0.00107605	0.0489726	0.000333169	16	10	PFS	t(14;16)
ENSG00000176731.12;AF:chr8:85217502-85218707:85219322:85217502-85220306:85220367:-	0.153015	1.8205	0.0499526	1.88509	0.209825	2.2303	0.134818	2.78921	0.125531	16	10	PFS	t(14;16)
ENSG00000176731.12;AL:chr8:85214077:85214631-85217386:85215015:85215037-85217386:-	-0.153015	1.8205	0.0499526	1.88509	0.209825	2.2303	0.134818	2.78921	0.125531	16	10	PFS	t(14;16)
ENSG00000177311.11;AF:chr3:141384810:141384875-141386872:141386442:141386755-141386872:+	0.31819	0.195826	0.18247	0.160584	0.13612	0.0920114	0.117036	0.0256433	0.0215984	13	13	OS	t(14;16)
ENSG00000177311.11;AF:chr3:141384810:141384875-141386872:141386442:141386755-141386872:+	0.31819	0.748925	0.50817	0.390985	0.0761738	0.298172	0.0238811	0.156646	0.0218492	13	13	PFS	t(14;16)
ENSG00000179222.18;AF:chrX:51803007:51803117-51894269:51893649:51893755-51894269:+	-0.117611	1.15878	0.626554	0.432472	0.111259	0.326762	0.0642896	0.165012	0.0251326	19	7	PFS	t(14;16)
ENSG00000179818.14;AF:chr2:70085624-70085816:70086717:70085624-70086978:70087005:-	0.199884	1.63449	0.325097	3.24421	0.185323	9.66318	0.152853	34.2537	0.0486007	16	10	OS	t(14;16)
ENSG00000180822.12;AL:chr6:3259196-3263684:3268050:3259196-3289799:3291984:+	0.25283	0.183361	0.160268	0.0976562	0.0430781	0.08029	0.0917287	0.0246083	0.0231246	13	13	OS	t(14;16)
ENSG00000181027.11;AL:chr19:46748665-46755412:46755463:46748665-46776652:46776988:+	-0.144848	0.206981	0.220393	0.130641	0.100067	0.110824	0.160022	0.0310807	0.048538	12	14	OS	t(14;16)
ENSG00000188554.15;AF:chr17:43170494:43170943-43175791:43171202:43171302-43175791:+	0.138512	0.775764	0.56153	0.414038	0.0952896	0.349974	0.0482407	0.263313	0.0645116	13	13	PFS	t(14;16)
ENSG00000189403.15;AF:chr13:30463694-30464161:30464310:30463694-30465073:30465242:-	0.163404	0.878426	0.728741	0.278644	0.00931675	0.314628	0.025658	0.133087	0.0171662	15	11	PFS	t(14;16)
ENSG00000196562.14;A5:chr20:47658392-47659399:47658392-47659697:-	-0.437417	0.171625	0.125787	0.115541	0.0586062	0.0608842	0.0544275	0.0487129	0.0468454	14	12	OS	t(14;16)
ENSG00000196562.14;A5:chr20:47658392-47659399:47658392-47659697:-	-0.437417	1.14537	0.684522	0.841009	0.733098	0.42153	0.123724	0.147409	0.0135189	14	12	PFS	t(14;16)
ENSG00000196562.14;A5:chr20:47757463-47785835:47757463-47786048:-	-0.526998	0.186632	0.137572	0.129988	0.0689327	0.0643192	0.0624015	0.0315711	0.0275184	15	11	OS	t(14;16)
ENSG00000196562.14;SE:chr20:47658392-47659399:47659452-47659697:-	-0.126471	0.173857	0.105716	0.102247	0.0326573	0.0471545	0.0343409	0.0384157	0.0288798	16	10	OS	t(14;16)
ENSG00000196562.14;SE:chr20:47658392-47659399:47659452-47659697:-	-0.126471	0.999244	0.998186	0.477737	0.159705	0.242527	0.0114897	0.0700571	0.00222784	16	10	PFS	t(14;16)
ENSG00000196655.12;AF:chr11:119018766:119018970-119021760:119019392:119020253-119021760:+	-0.122444	1.96471	0.0277369	1.99209	0.174885	3.59378	0.044913	8.21442	0.0241356	17	9	PFS	t(14;16)
ENSG00000196922.10;SE:chr8:144994592-144996507:144996607-144999603:-	-0.177263	2.17581	0.124414	3.92139	0.133576	12.4549	0.0917287	33.7198	0.0212214	13	13	OS	t(14;16)
ENSG00000197111.16;AL:chr12:53471807-53474869:53476070:53471807-53479406:53480807:+	0.110634	0.462716	0.344618	0.347415	0.252696	0.264981	0.193311	0.044765	0.0317663	15	11	OS	t(14;16)
ENSG00000197150.12;A5:chr7:151044221-151045209:151044146-151045209:+	0.113428	0.192292	0.193291	0.138832	0.113555	0.0968338	0.128697	0.0325564	0.0372572	12	14	OS	t(14;16)
ENSG00000197969.14;SE:chr9:77282274-77283355:77283471-77283547:+	-0.101515	0.189851	0.156564	0.13111	0.0790739	0.0799274	0.091863	0.0267995	0.020638	14	12	OS	t(14;16)
ENSG00000204152.13;SE:chr10:49942300-49943235:49943358-49945032:+	0.118933	1.02663	0.937016	0.45671	0.118626	0.328478	0.0366261	0.233953	0.0262998	17	9	PFS	t(14;16)
ENSG00000204256.13;AF:chr6:32968594:32969056-32971595:32970888:32971197-32971595:+	0.103844	1.74759	0.331812	2.17782	0.371619	3.6709	0.203424	39.3507	0.0257852	12	14	OS	t(14;16)
ENSG00000204256.13;AF:chr6:32968594:32969056-32971595:32970888:32971197-32971595:+	0.103844	2.61113	0.0029124	2.54644	0.0665205	4.49583	0.00921831	11.9067	0.00887119	12	14	PFS	t(14;16)
ENSG00000204514.10;AL:chr19:57850315:57850561-57876916:57869381:57875226-57876916:-	-0.161794	0.175311	0.146163	0.12469	0.0791442	0.0739577	0.0787083	0.0225052	0.0131998	13	13	OS	t(14;16)
ENSG00000204852.16;SE:chr12:110632559-110634670:110634779-110636481:+	0.148494	0.198646	0.157648	0.134883	0.0746947	0.0766562	0.0876253	0.0312324	0.0276058	15	11	OS	t(14;16)
ENSG00000205981.8;AF:chr3:180988229-180989332:180989518:180988229-180989600:180989736:-	-0.121115	2.21096	0.00980147	2.61603	0.0561973	3.43026	0.0316654	4.19437	0.0281463	15	11	PFS	t(14;16)
ENSG00000214160.10;AF:chr3:184245812-184248782:184248949:184245812-184249226:184249548:-	-0.225122	1.06184	0.856881	0.591874	0.307043	0.35551	0.0620164	0.14865	0.0379472	17	9	PFS	t(14;16)
ENSG00000214279.13;SE:chr10:133460170-133464606:133464930-133465106:+	0.162884	0.188965	0.155032	0.0997338	0.0387503	0.0777216	0.0872085	0.0549092	0.0600092	14	12	OS	t(14;16)
ENSG00000228863.8;SE:chr1:160685101-160686609:160686693-160698955:+	0.122135	0.199684	0.159417	0.113574	0.0479596	0.0811093	0.0973643	0.0542386	0.0612717	15	11	OS	t(14;16)
ENSG00000231721.7;A3:chr7:130944906-130945720:130944889-130945720:-	0.102111	0.815072	0.609968	0.375511	0.0511176	0.352174	0.0399222	0.26177	0.0839311	15	11	PFS	t(14;16)
ENSG00000231721.7;MX:chr7:130945835-130959869:130959970-130984053:130945835-130978508:130978528-130984053:-	-0.117261	1.83711	0.292494	5.53326	0.0471102	3.70621	0.201439	31.4299	0.0564011	10	16	OS	t(14;16)
ENSG00000231721.7;MX:chr7:130945835-130967389:130967517-130984053:130945835-130978508:130978528-130984053:-	-0.113387	2.122	0.136373	6.08512	0.0391223	12.4549	0.0917287	38.4901	0.0240244	13	13	OS	t(14;16)
ENSG00000231721.7;MX:chr7:130945835-130967389:130967517-130984053:130945835-130978508:130978528-130984053:-	-0.113387	2.24065	0.0121085	2.9654	0.0262065	2.61899	0.0602923	6.61323	0.0167913	13	13	PFS	t(14;16)
ENSG00000248309.7;AF:chr5:88883328:88883485-88905209:88889460:88889480-88905209:+	-0.162577	0.170581	0.124072	0.117529	0.0601952	0.0608842	0.0544275	0.0280928	0.020316	14	12	OS	t(14;16)
ENSG00000248309.7;AF:chr5:88883328:88883485-88905209:88889460:88889480-88905209:+	-0.162577	1.01261	0.971644	0.584802	0.272563	0.431628	0.0968132	0.289132	0.0436583	14	12	PFS	t(14;16)
ENSG00000248309.7;AF:chr5:88883417:88883485-88905209:88889460:88889480-88905209:+	-0.131921	0.181473	0.173451	0.135015	0.107166	0.0905546	0.114994	0.0307407	0.0309247	12	14	OS	t(14;16)
ENSG00000248309.7;AL:chr5:88905773-88940813:88941370:88905773-89031758:89032293:+	0.162577	0.170581	0.124072	0.117529	0.0601952	0.0608842	0.0544275	0.0280928	0.020316	14	12	OS	t(14;16)
ENSG00000248309.7;AL:chr5:88905773-88940813:88941370:88905773-89031758:89032293:+	0.162577	1.01261	0.971644	0.584802	0.272563	0.431628	0.0968132	0.289132	0.0436583	14	12	PFS	t(14;16)
ENSG00000249437.8;SE:chr5:71011374-71011712:71011786-71012348:-	0.138927	2.64293	0.0113802	1.50597	0.419907	3.4791	0.0259236	7.21725	0.00677115	10	16	PFS	t(14;16)
ENSG00000255026.1;A5:chr11:288811-288950:288799-288950:+	-0.130353	0.174615	0.118101	0.0708606	0.0116981	0.0495155	0.0357811	0.015357	0.0224967	15	11	OS	t(14;16)
ENSG00000003402.20;AF:chr2:201118664:201118901-201129729:201129329:201129520-201129729:+	-0.263134	0.800969	0.223138	0.870537	0.456284	0.782659	0.367309	0.535802	0.0336358	75	42	PFS	t(11;14)
ENSG00000065357.20;RI:chr12:55939415:55939529-55940082:55940433:+	0.127747	1.27665	0.158089	1.4883	0.0280366	2.09715	0.00960846	2.47907	0.00386904	66	51	PFS	t(11;14)
ENSG00000075420.13;AF:chr3:172039578:172039771-172112452:172040554:172040624-172112452:+	0.125719	1.51847	0.134913	1.52322	0.146421	2.57421	0.034766	1.86343	0.217048	57	60	OS	t(11;14)
ENSG00000104660.19;AL:chr8:30104486-30105746:30108524:30104486-30137272:30138348:+	-0.140305	1.18703	0.320948	1.33181	0.106643	1.88496	0.026182	1.82002	0.0430417	68	49	PFS	t(11;14)
ENSG00000104872.11;A3:chr19:49446794-49447024:49446595-49447024:-	-0.120647	0.658939	0.0469618	0.760095	0.201626	0.59687	0.0554981	0.510413	0.0174797	60	57	PFS	t(11;14)
ENSG00000105185.12;AF:chr19:32581190:32581327-32582195:32581526:32581700-32582195:+	-0.187046	0.516615	0.0709593	0.702375	0.35321	0.335791	0.0149118	0.526732	0.198631	65	52	OS	t(11;14)
ENSG00000113648.16;A5:chr5:135346057-135352946:135346057-135360497:-	-0.107121	1.14709	0.629893	1.57012	0.137654	1.49504	0.359038	2.8466	0.031446	61	56	OS	t(11;14)
ENSG00000116584.20;AF:chr1:155969300-155969969:155971063:155969300-155978913:155979099:-	-0.124615	0.683735	0.0600692	0.816468	0.327522	0.616311	0.0711599	0.486365	0.0161783	68	49	PFS	t(11;14)
ENSG00000117411.16;AF:chr1:43979202:43979511-43981109:43979877:43980614-43981109:+	0.182401	1.58724	0.0897596	1.71711	0.0536164	2.92816	0.0207404	2.26742	0.0914175	56	61	OS	t(11;14)
ENSG00000119729.12;AF:chr2:46542736:46543188-46576087:46543400:46543812-46576087:+	0.152636	1.61063	0.0513446	1.60276	0.0600229	3.89162	0.00931548	1.90328	0.039103	63	54	OS	t(11;14)
ENSG00000119729.12;AF:chr2:46542736:46543188-46576087:46543400:46543812-46576087:+	0.152636	1.18497	0.343486	1.39535	0.0726519	1.73977	0.0444234	1.73357	0.0570388	63	54	PFS	t(11;14)
ENSG00000122565.19;AF:chr7:26201162:26201561-26202971:26201757:26202609-26202971:+	-0.120318	0.655799	0.207631	0.757094	0.421939	0.494402	0.100595	0.349001	0.0304982	64	53	OS	t(11;14)
ENSG00000131153.9;AF:chr16:85687574-85688809:85688954:85687574-85689796:85690073:-	0.132622	0.45758	0.0652689	0.552008	0.171164	0.336387	0.0265186	0.413005	0.0861823	55	62	OS	t(11;14)
ENSG00000133961.20;SE:chr14:73297285-73316390:73316422-73323130:-	-0.110818	0.655441	0.0487899	0.784888	0.269109	0.616941	0.075494	0.613161	0.0885083	57	60	PFS	t(11;14)
ENSG00000134851.13;AL:chr4:55424643-55425376:55425631:55424643-55452239:55453397:+	-0.126177	1.47234	0.153262	1.64464	0.0784889	2.6735	0.0349359	3.47211	0.0128916	63	54	OS	t(11;14)
ENSG00000147535.17;SE:chr8:38267960-38268371:38268407-38268882:-	0.121073	1.31572	0.136863	1.69737	0.00550889	1.95571	0.0134413	2.4632	0.00139085	58	59	PFS	t(11;14)
ENSG00000151702.17;AF:chr11:128692982:128693143-128758115:128694072:128694276-128758115:+	0.122602	0.469805	0.0770419	0.524531	0.137749	0.355948	0.0359839	0.357775	0.0503127	53	64	OS	t(11;14)
ENSG00000153551.14;SE:chr3:32442013-32452392:32452473-32454241:+	-0.118825	0.541366	0.029413	0.632213	0.110791	0.519657	0.0387832	0.625054	0.159974	37	80	PFS	t(11;14)
ENSG00000154237.13;A5:chr15:101022597-101024803:101022478-101024803:+	-0.13382	1.30329	0.183052	1.55287	0.0302535	1.75145	0.0364214	1.59517	0.0912836	49	68	PFS	t(11;14)
ENSG00000160752.15;A5:chr1:155310205-155312255:155308965-155312255:+	-0.148337	0.539162	0.0938312	0.634052	0.227164	0.378214	0.0307781	0.420984	0.0865839	62	55	OS	t(11;14)
ENSG00000166167.18;SE:chr10:101354228-101430345:101430452-101461981:+	-0.111494	1.27432	0.166113	1.46269	0.0359167	2.04089	0.011221	2.43238	0.00288526	64	53	PFS	t(11;14)
ENSG00000169592.15;SE:chr16:30001040-30001212:30001530-30005221:+	-0.10649	0.611546	0.137056	0.715134	0.327124	0.412485	0.038977	0.316114	0.0192261	71	46	OS	t(11;14)
ENSG00000169592.15;SE:chr16:30001040-30001212:30001530-30005221:+	-0.10649	0.626052	0.0163834	0.709066	0.0884742	0.482266	0.00654573	0.416434	0.00278584	71	46	PFS	t(11;14)
ENSG00000179335.18;AL:chr15:74629032-74629707:74629962:74629032-74635098:74645414:+	0.112264	1.20272	0.291226	1.42387	0.0488122	1.86066	0.0272898	2.11122	0.011888	65	52	PFS	t(11;14)
ENSG00000183283.16;AL:chr12:51241116-51246061:51246717:51241116-51270718:51271362:+	0.132502	0.524687	0.101807	0.601059	0.20635	0.396396	0.0473597	0.419804	0.0968398	59	58	OS	t(11;14)
ENSG00000188938.17;AF:chr9:93450599-93450945:93451208:93450599-93452147:93453581:-	-0.111053	1.49996	0.125544	1.77005	0.039321	3.08214	0.0216631	2.97963	0.0372677	60	57	OS	t(11;14)
ENSG00000203667.10;AF:chr1:244835656:244835756-244842195:244839747:244842058-244842195:+	0.111756	0.409988	0.0577005	0.541642	0.208221	0.307341	0.0259497	0.574442	0.353268	48	69	OS	t(11;14)
ENSG00000204463.12;AF:chr6:31651776-31651902:31652153:31651776-31652400:31652700:-	0.132346	0.754605	0.380569	0.799388	0.493758	0.648405	0.308996	0.352087	0.0289892	68	49	OS	t(11;14)
ENSG00000204628.12;AL:chr5:181239539:181239582-181241492:181240957:181241418-181241492:-	0.112573	0.612248	0.137503	0.688852	0.269486	0.415519	0.0407105	0.377404	0.0536647	72	45	OS	t(11;14)
ENSG00000204628.12;AL:chr5:181239539:181239582-181241492:181240957:181241418-181241492:-	0.112573	0.676775	0.0424368	0.748516	0.142261	0.575319	0.039281	0.522942	0.0252424	72	45	PFS	t(11;14)
ENSG00000214022.11;SE:chr7:150369868-150370714:150370884-150371228:+	0.107739	0.704463	0.0732652	0.779687	0.215915	0.646012	0.101865	0.549024	0.0298875	70	47	PFS	t(11;14)
ENSG00000214279.13;SE:chr10:133460170-133464606:133464930-133465106:+	0.118688	1.33107	0.289902	1.57046	0.106855	2.15454	0.101637	3.66151	0.0177105	63	54	OS	t(11;14)
ENSG00000244682.7;SE:chr1:161592242-161595553:161595590-161599630:+	0.107423	0.601406	0.124786	0.679243	0.252934	0.393984	0.0301574	0.431735	0.0766337	69	48	OS	t(11;14)
ENSG00000003402.20;AF:chr2:201116164:201116481-201129729:201129329:201129520-201129729:+	0.172114	1.69071	0.00999907	1.43714	0.196131	1.43396	0.203193	1.58541	0.149659	39	39	PFS	t(4;14)
ENSG00000004961.15;A5:chrX:11111518-11112019:11111423-11112019:+	0.109496	1.52031	0.0173057	1.07441	0.811869	1.16681	0.628377	1.1535	0.662759	56	22	PFS	t(4;14)
ENSG00000007541.17;AF:chr16:570062:570096-574066:572506:572601-574066:+	-0.110272	1.78229	0.0469674	3.33956	0.010872	4.15681	0.0246138	4.73331	0.0271872	45	33	OS	t(4;14)
ENSG00000007541.17;AF:chr16:570062:570096-574066:572506:572601-574066:+	-0.110272	1.71363	0.00429403	1.58788	0.105141	1.54969	0.13547	1.87766	0.0546892	45	33	PFS	t(4;14)
ENSG00000012822.16;SE:chr12:53712121-53712775:53712846-53713100:-	-0.105286	1.90641	0.000530129	1.57209	0.114988	1.89958	0.0298777	1.88587	0.0376291	44	34	PFS	t(4;14)
ENSG00000016864.18;AF:chr3:52700496-52703504:52703619:52700496-52705447:52705682:-	-0.116462	1.88628	0.000659218	1.91474	0.0233432	1.75637	0.0571091	1.84712	0.0536119	43	35	PFS	t(4;14)
ENSG00000048740.18;AF:chr10:11017930:11018163-11165486:11165030:11165317-11165486:+	-0.229113	1.66316	0.0234228	1.41982	0.214555	1.33645	0.308671	1.68886	0.0873974	34	44	PFS	t(4;14)
ENSG00000057608.17;A3:chr10:5766638-5768213:5766295-5768213:-	0.108005	1.46321	0.0456447	1.0201	0.943795	1.07772	0.79593	1.03575	0.91103	48	30	PFS	t(4;14)
ENSG00000058799.15;SE:chr1:53852270-53855001:53855051-53860056:-	-0.140271	1.96849	0.000786626	1.826	0.031678	1.87232	0.0300626	2.09963	0.0149108	38	40	PFS	t(4;14)
ENSG00000064225.12;AF:chr3:98732704:98733011-98768430:98763348:98763439-98768430:+	0.102679	1.68457	0.0179106	1.32325	0.32067	1.41048	0.228225	1.40193	0.257838	33	45	PFS	t(4;14)
ENSG00000067225.18;AF:chr15:72219110-72229547:72229722:72219110-72231116:72231386:-	0.123969	1.44167	0.0450856	0.861081	0.610651	1.00906	0.976019	0.819155	0.558726	53	25	PFS	t(4;14)
ENSG00000067365.15;AL:chr16:8644725-8645908:8646027:8644725-8646108:8646222:+	-0.103468	0.75502	0.469108	0.388862	0.0447984	0.51027	0.177245	0.355935	0.0624604	43	35	OS	t(4;14)
ENSG00000072310.17;SE:chr17:17820521-17823518:17823607-17836727:-	0.161524	1.52252	0.014504	1.21266	0.536338	1.23026	0.538467	1.18832	0.624246	59	19	PFS	t(4;14)
ENSG00000075711.21;SE:chr3:197149796-197161640:197161738-197194425:-	-0.123815	1.5952	0.0242979	1.31316	0.333623	1.30011	0.352741	1.42813	0.256507	40	38	PFS	t(4;14)
ENSG00000078304.19;AF:chr14:101809835:101810036-101836169:101823878:101823941-101836169:+	-0.157317	1.57348	0.0212689	1.16517	0.586107	1.20322	0.515287	1.23253	0.490744	40	38	PFS	t(4;14)
ENSG00000080822.17;AL:chr3:98515483:98515832-98517052:98516711:98516879-98517052:-	-0.1063	1.0283	0.90228	0.541142	0.0312247	0.523744	0.0243068	0.441151	0.00833641	38	40	PFS	t(4;14)
ENSG00000082805.20;SE:chr12:1110347-1112215:1112298-1115866:+	-0.10184	0.701106	0.392958	0.369754	0.0405136	0.458794	0.12794	0.281802	0.0293377	42	36	OS	t(4;14)
ENSG00000089009.15;AF:chr12:112408656-112409041:112409574:112408656-112409587:112409614:-	-0.112505	1.5585	0.0265251	0.957598	0.876375	1.21416	0.494119	0.946542	0.857205	44	34	PFS	t(4;14)
ENSG00000091490.11;AL:chr4:25748064:25748564-25757534:25755922:25756908-25757534:-	-0.107568	1.55324	0.0452064	1.01337	0.963278	1.12784	0.67326	1.16925	0.62718	34	44	PFS	t(4;14)
ENSG00000091592.16;A5:chr17:5532984-5533292:5532984-5533304:-	0.104236	1.59755	0.029783	1.02422	0.932922	1.21841	0.485972	1.09889	0.765358	36	42	PFS	t(4;14)
ENSG00000100209.11;AF:chr22:28742039:28742331-28743882:28742679:28742728-28743882:+	0.143547	1.61563	0.0148058	1.3826	0.252969	1.30125	0.35489	1.55392	0.184887	43	35	PFS	t(4;14)
ENSG00000100209.11;AF:chr22:28742055:28742331-28743882:28742679:28742728-28743882:+	0.142135	1.87369	0.00104004	1.69568	0.0650729	1.82487	0.038246	2.11117	0.0264101	43	35	PFS	t(4;14)
ENSG00000101040.19;SE:chr20:47236516-47238758:47239138-47246008:-	0.104726	1.52107	0.0280075	0.948465	0.853551	1.10058	0.740615	0.956289	0.890451	42	36	PFS	t(4;14)
ENSG00000101294.18;AL:chr20:31566295-31568078:31568211:31566295-31569120:31569308:+	-0.17767	1.5985	0.0213251	1.37187	0.256409	1.33957	0.302774	1.56177	0.136895	43	35	PFS	t(4;14)
ENSG00000102316.17;AF:chrX:54807745:54807802-54809303:54808371:54808433-54809303:+	-0.172062	1.54371	0.0228369	1.14224	0.638318	1.25227	0.438135	1.33735	0.352026	48	30	PFS	t(4;14)
ENSG00000104852.15;A5:chr19:49102185-49104634:49102173-49104634:+	0.153668	1.53149	0.0359372	0.995432	0.987039	1.14997	0.620536	0.851497	0.626762	41	37	PFS	t(4;14)
ENSG00000105221.18;AF:chr19:40265351-40279107:40279330:40265351-40285181:40285345:-	0.103232	1.59909	0.0126787	1.1296	0.670352	1.30186	0.367874	1.18616	0.593061	47	31	PFS	t(4;14)
ENSG00000108312.15;AF:chr17:44218296-44219009:44219121:44218296-44220740:44220963:-	-0.144393	1.64954	0.0141158	1.30577	0.349883	1.28083	0.384886	1.09445	0.791891	40	38	PFS	t(4;14)
ENSG00000110429.14;AL:chr11:33740956:33742084-33747130:33745937:33746059-33747130:-	0.117995	1.71868	0.00363563	1.75663	0.0513704	1.55907	0.136077	1.93521	0.0508081	45	33	PFS	t(4;14)
ENSG00000111481.10;AF:chr12:54325109:54325181-54340547:54325584:54325682-54340547:+	0.117632	1.79632	0.00223436	1.87013	0.0282015	1.64653	0.0859121	1.84893	0.0555901	43	35	PFS	t(4;14)
ENSG00000115677.17;AF:chr2:241268541-241272761:241272863:241268541-241315570:241315672:-	0.209102	1.52564	0.049504	0.968482	0.909256	1.13421	0.656181	0.917001	0.778283	36	42	PFS	t(4;14)
ENSG00000115935.17;AF:chr2:174585611-174597601:174597765:174585611-174682774:174682899:-	-0.108339	1.71089	0.00501383	1.55373	0.121281	1.47856	0.177978	1.69857	0.0905856	39	39	PFS	t(4;14)
ENSG00000115998.7;AF:chr2:70182935-70190184:70190699:70182935-70190973:70191071:-	-0.166397	1.8008	0.00545422	1.13857	0.647095	1.52335	0.136469	1.20235	0.554968	35	43	PFS	t(4;14)
ENSG00000118363.12;AF:chr11:74949271:74949399-74965034:74949524:74949649-74965034:+	0.133127	1.5138	0.049271	1.21309	0.490498	1.13028	0.664773	1.30925	0.381859	38	40	PFS	t(4;14)
ENSG00000119185.13;A3:chr2:9407598-9408113:9406905-9408113:-	0.122131	1.48309	0.0447649	1.02268	0.93638	1.07427	0.801313	1.01444	0.962709	45	33	PFS	t(4;14)
ENSG00000122565.19;AF:chr7:26201162:26201561-26202971:26201757:26202609-26202971:+	-0.112039	0.583586	0.231565	0.469083	0.137046	0.345021	0.0464118	0.35465	0.080911	39	39	OS	t(4;14)
ENSG00000127415.13;AF:chr4:987044:987242-1000612:991825:991940-1000612:+	-0.133166	1.61401	0.0167698	1.06775	0.81748	1.34942	0.290727	1.40991	0.27293	40	38	PFS	t(4;14)
ENSG00000128928.10;AL:chr15:40416362-40418130:40419157:40416362-40435417:40435765:+	0.151161	1.85299	0.0025369	1.62504	0.080393	1.66294	0.0731024	1.86315	0.0369453	38	40	PFS	t(4;14)
ENSG00000128973.13;AF:chr15:68218650-68229502:68229716:68218650-68256697:68257211:-	0.142301	1.46566	0.0243558	1.055	0.868726	1.08055	0.824606	1.1545	0.699216	61	17	PFS	t(4;14)
ENSG00000129484.13;A3:chr14:20357149-20357396:20357149-20357638:+	0.10654	1.77484	0.00788705	1.56606	0.112026	1.50687	0.14995	1.54309	0.1536	36	42	PFS	t(4;14)
ENSG00000129657.16;AF:chr17:77140932:77141054-77142646:77141386:77141721-77142646:+	0.110388	1.75381	0.0125877	1.22821	0.475758	1.36644	0.275456	1.34224	0.359707	29	49	PFS	t(4;14)
ENSG00000131143.10;RI:chr16:85804937:85805153-85805733:85805864:+	-0.100275	1.71841	0.0715338	1.70015	0.265606	3.19006	0.0433982	2.45552	0.139644	45	33	OS	t(4;14)
ENSG00000131368.8;A5:chr3:15052633-15053291:15052633-15053380:-	0.110137	1.6252	0.021579	1.29458	0.357099	1.19725	0.525204	1.1452	0.654802	36	42	PFS	t(4;14)
ENSG00000131446.17;AL:chr5:180784780:180793097-180802680:180795430:180795875-180802680:-	-0.108038	2.24918	0.0192156	2.69923	0.0404347	3.20387	0.0200874	3.97978	0.0108714	23	55	OS	t(4;14)
ENSG00000131446.17;AL:chr5:180784780:180793097-180802680:180795430:180795875-180802680:-	-0.108038	1.88873	0.0085914	1.33239	0.334533	1.59126	0.114385	1.56184	0.17814	23	55	PFS	t(4;14)
ENSG00000132341.12;SE:chr12:130872126-130872584:130872617-130872836:+	0.130448	1.57553	0.00635657	1.26492	0.487104	1.44692	0.329376	1.40233	0.392767	63	15	PFS	t(4;14)
ENSG00000132522.16;AF:chr17:7315119-7315252:7315328:7315119-7315331:7315564:-	-0.153072	1.59281	0.0200848	1.31856	0.322312	1.22549	0.473009	1.26889	0.426395	39	39	PFS	t(4;14)
ENSG00000132635.17;AF:chr20:2839933-2840211:2840671:2839933-2840866:2841190:-	0.137763	1.51883	0.0397566	1.26246	0.405889	1.13542	0.652656	1.25719	0.460472	40	38	PFS	t(4;14)
ENSG00000135473.15;AF:chr12:56333208-56333487:56333693:56333208-56333862:56334006:-	-0.120244	1.95424	0.00197382	1.83946	0.031844	1.68103	0.0687751	2.24814	0.0167144	33	45	PFS	t(4;14)
ENSG00000135506.16;A5:chr12:57696373-57715760:57695981-57715760:+	-0.100077	1.86774	0.00040817	1.99167	0.0233942	2.03054	0.0255557	2.24591	0.0270434	51	27	PFS	t(4;14)
ENSG00000135905.19;AF:chr2:224931668-224946847:224947065:224931668-225042252:225042442:-	0.301551	1.72086	0.0102103	1.41424	0.2195	1.42511	0.209636	1.65038	0.131895	36	42	PFS	t(4;14)
ENSG00000136104.21;AF:chr13:50910126:50910140-50927407:50910274:50913131-50927407:+	0.190996	1.72564	0.00858431	1.45786	0.176879	1.45971	0.180449	1.84761	0.0538585	38	40	PFS	t(4;14)
ENSG00000137804.14;A3:chr15:41349241-41350988:41349241-41351033:+	-0.101287	1.61054	0.0172123	1.48762	0.154707	1.26127	0.412003	2.05726	0.0366172	41	37	PFS	t(4;14)
ENSG00000137955.16;A5:chr1:75790517-75791285:75790057-75791285:+	-0.125332	1.89406	0.00102257	1.41561	0.21737	1.76582	0.0474013	1.46877	0.21667	40	38	PFS	t(4;14)
ENSG00000137955.16;AF:chr1:75786228:75786274-75787497:75786700:75786865-75787497:+	-0.103937	1.53885	0.0340328	0.970295	0.91455	1.14978	0.620903	1.05862	0.84787	39	39	PFS	t(4;14)
ENSG00000140263.15;A3:chr15:45043421-45060982:45043421-45061067:+	0.10085	0.817193	0.535304	0.441705	0.0786873	0.366036	0.0499378	0.372552	0.0807273	58	20	OS	t(4;14)
ENSG00000140443.15;A3:chr15:98924684-98929558:98924684-98929561:+	-0.219456	0.520875	0.136859	0.222035	0.00202946	0.269251	0.0137848	0.186518	0.0039949	46	32	OS	t(4;14)
ENSG00000140474.14;AF:chr15:74842420-74842535:74842676:74842420-74843004:74843211:-	-0.117035	0.400925	0.107732	0.280341	0.0322444	0.247729	0.0278096	0.273865	0.0436051	32	46	OS	t(4;14)
ENSG00000141337.12;AF:chr17:68259182:68259426-68306943:68291491:68291568-68306943:+	-0.168835	1.42768	0.0453731	0.907219	0.748304	0.931693	0.820907	0.734795	0.408957	54	24	PFS	t(4;14)
ENSG00000141562.18;AF:chr17:82458180:82458517-82459992:82458703:82458830-82459992:+	0.139651	1.44148	0.0451046	1.20209	0.531716	1.0309	0.919297	1.26287	0.518032	54	24	PFS	t(4;14)
ENSG00000142541.17;A5:chr19:49490090-49490232:49489912-49490232:+	-0.254866	1.63425	0.0140963	1.19656	0.530088	1.33189	0.310859	1.16007	0.65609	40	38	PFS	t(4;14)
ENSG00000143164.15;AF:chr1:167936274:167936509-167951800:167936673:167937008-167951800:+	0.135854	1.54384	0.181451	2.53866	0.0422499	1.96132	0.188776	2.96675	0.0605044	37	41	OS	t(4;14)
ENSG00000144711.16;AF:chr3:12941865-12986971:12987036:12941865-13022033:13022596:-	-0.244925	1.54221	0.0231388	1.35725	0.284171	1.23207	0.470875	1.42628	0.280933	48	30	PFS	t(4;14)
ENSG00000147677.11;AL:chr8:116658545:116658980-116755666:116726055:116726172-116755666:-	0.161481	1.55642	0.0244933	1.39799	0.23399	1.18154	0.557299	1.31744	0.369623	40	38	PFS	t(4;14)
ENSG00000148444.16;AF:chr10:22316386:22316556-22317884:22316735:22316967-22317884:+	0.118159	2.11237	0.000165901	1.51435	0.139946	2.13341	0.00869045	1.70912	0.0886396	37	41	PFS	t(4;14)
ENSG00000148444.16;AF:chr10:22316415:22316556-22317884:22316735:22316967-22317884:+	0.10571	1.61326	0.0151168	0.977145	0.934297	1.38015	0.258326	1.00377	0.990844	43	35	PFS	t(4;14)
ENSG00000148444.16;AF:chr10:22316420:22316556-22317884:22316735:22316967-22317884:+	0.132186	1.45124	0.0415183	0.901835	0.721801	0.997775	0.994077	0.8549	0.615221	48	30	PFS	t(4;14)
ENSG00000148824.19;A5:chr10:133394332-133395713:133394184-133395713:+	0.114031	1.49397	0.019447	1.12427	0.708751	1.13036	0.716093	1.20027	0.601047	57	21	PFS	t(4;14)
ENSG00000150527.17;AF:chr14:39265292:39265421-39276934:39265968:39266527-39276934:+	-0.108387	1.49658	0.0272859	0.956378	0.879328	1.10531	0.738706	0.993633	0.984974	49	29	PFS	t(4;14)
ENSG00000150527.17;AF:chr14:39265292:39265421-39276934:39267411:39267522-39276934:+	-0.119478	1.53601	0.0189043	1.33994	0.323977	1.2185	0.509446	1.36989	0.411661	48	30	PFS	t(4;14)
ENSG00000150527.17;AF:chr14:39265292:39265421-39276934:39267414:39267522-39276934:+	-0.102789	1.48279	0.0290043	1.24065	0.471621	1.08146	0.797568	1.1772	0.648348	50	28	PFS	t(4;14)
ENSG00000150967.18;SE:chr12:122940284-122940807:122940995-122944391:-	0.149434	1.53126	0.014323	1.59195	0.135283	1.25699	0.484495	1.68163	0.181242	58	20	PFS	t(4;14)
ENSG00000152556.17;SE:chr12:48135038-48135291:48135383-48137721:+	-0.104067	1.61978	0.011603	1.43505	0.204395	1.32338	0.334165	1.44661	0.251608	44	34	PFS	t(4;14)
ENSG00000152767.17;AF:chr13:98142562:98142777-98213220:98143094:98143492-98213220:+	-0.603866	1.50437	0.0201628	1.01	0.97372	1.16607	0.629674	1.12663	0.716511	57	21	PFS	t(4;14)
[truncated: 375 more rows]

## Sheet: S5
Table 5. Overlapped correlation network among three translocation comparisons
[truncated: 573 more rows]
